# Supplementary material for: Characteristics of gauged abrupt wave fronts (walls of water) in flash floods in Scotland
Source: Copernicus journal article supplement (doi:10.5194/hess-29-5777-2025), 2025-10-28
Supplement: Supplementary file 1 [file Supplementary data B.xlsx]

## Sheet: seasonality
id	top1_l	top2_l	top3_l	top4_l	top5_l	median_l		std_l	top1_f	top2_f	top3_f	top4_f	top5_f	median_f	Season	std_f
1001	2010-12-28 06:45:00	2012-10-20 04:30:00	1999-04-21 04:00:00	2020-02-29 08:00:00	1996-01-01 18:15:00	1900-07-09	wwwws	95	2006-10-12 01:45:00	1997-07-01 09:30:00	2010-08-05 23:30:00	2012-10-20 04:30:00	2016-06-24 15:45:00	1900-10-07	wssws	89
17015	1992-11-01 03:45:00	2007-06-23 17:45:00	1997-09-16 13:00:00	2003-05-24 17:00:00	1998-07-06 22:15:00	1900-07-26	wssss	82	1998-07-06 22:15:00	1993-01-23 20:45:00	2002-09-10 01:30:00	1997-09-16 13:00:00	2000-09-22 10:00:00	1900-09-16	swsss	93
19004	2016-06-07 12:30:00	2009-07-06 14:30:00	2019-06-24 16:15:00	2010-09-23 03:00:00	2012-08-29 14:45:00	1900-07-16	sssss	76	2016-06-07 12:30:00	2006-05-22 22:45:00	2012-08-29 14:45:00	2000-08-20 17:00:00	2010-09-23 03:00:00	1900-07-06	sssss	90
14001	2002-07-31 01:30:00	2008-08-10 02:30:00	2000-10-09 18:00:00	1999-12-24 21:45:00	1995-11-15 10:30:00	1900-07-17 12:00:00	sswww	93	2009-07-06 11:30:00	2008-08-10 02:30:00	2002-07-31 01:30:00	2013-05-20 16:30:00	2009-11-01 15:30:00	1900-07-12 12:00:00	ssssw	103
8007	2000-08-02 20:00:00	2001-01-22 20:30:00	2004-10-19 16:30:00	1991-09-21 17:00:00	2001-10-01 01:45:00	1900-09-21	swwsw	106	2021-11-09 13:15:00	1998-10-16 15:45:00	2009-07-02 19:30:00	2001-10-01 01:45:00	2011-10-29 18:15:00	1900-08-21 12:00:00	wwsww	124
77002	2019-08-06 06:00:00	2009-07-15 23:15:00	2002-07-30 17:30:00	1996-10-12 06:30:00	1995-10-03 06:30:00	1900-08-02	sssww	85	2002-07-30 17:30:00	2005-10-11 22:30:00	1995-10-03 06:30:00	2002-10-27 07:45:00	1991-07-20 18:15:00	1900-08-24	swwws	115
21006	2004-08-04 04:30:00	1986-07-31 01:00:00	1987-07-10 17:30:00	1988-07-10 09:45:00	1989-09-18 20:15:00	1900-07-22	sssss	78	2004-08-04 04:30:00	2002-03-04 06:45:00	2003-05-30 16:15:00	2007-02-27 09:45:00	2000-09-11 10:00:00	1900-08-04	swsws	118
15023	2020-08-11 18:45:00	1996-01-01 19:45:00	2002-08-06 21:30:00	2007-07-01 19:00:00	2010-12-10 15:30:00	1900-09-01	swssw	89	2004-08-11 08:15:00	1996-01-01 19:45:00	2010-12-10 15:30:00	1997-02-19 15:15:00	2001-10-20 16:45:00	1900-08-05 12:00:00	swsws	112
89003	2018-12-18 15:15:00	1994-08-03 20:00:00	1995-03-23 09:00:00	1996-10-04 10:30:00	2015-08-10 14:30:00	1900-08-08 12:00:00	wswws	102	1996-10-04 10:30:00	2018-12-18 15:15:00	1983-01-01 08:00:00	1995-03-23 09:00:00	1991-04-01 08:30:00	1900-09-27	wwwww	102
96002	2010-01-14 11:15:00	1998-06-27 16:30:00	1996-01-02 11:00:00	1985-12-01 06:30:00	2013-05-13 23:00:00	1900-07-30	wswws	100	2010-01-14 11:15:00	1998-06-27 16:30:00	1983-10-04 18:30:00	2006-10-26 18:00:00	1985-12-01 06:30:00	1900-09-07 12:00:00	wswww	121
6007	2013-02-04 13:45:00	1977-11-08 19:45:00	2020-10-24 07:30:00	2002-03-10 22:00:00	2020-02-09 15:15:00	1900-10-06	wwwww	130	2016-05-05 12:30:00	1976-01-27 07:00:00	1995-10-25 01:30:00	1977-11-08 19:45:00	1972-12-04 21:45:00	1900-08-31	swwww	136
11002	1973-12-03 09:45:00	1982-08-07 10:45:00	1999-07-11 00:30:00	1986-03-04 22:00:00	1979-01-15 00:15:00	1900-08-06 12:00:00	wssww	97	1973-12-03 09:45:00	1981-12-31 01:30:00	1979-01-15 00:15:00	1999-07-11 00:30:00	1984-09-24 01:30:00	1900-08-19 12:00:00	wwwwss	109
83005	1999-11-28 09:00:00	2015-07-17 07:30:00	2012-08-06 16:15:00	1986-05-10 05:45:00	2016-05-02 10:45:00	1900-08-19	wssss	77	1986-05-10 05:45:00	1982-11-23 10:45:00	2012-08-06 16:15:00	1999-11-28 09:00:00	1991-11-11 09:00:00	1900-09-16	swsww	91
84018	1995-03-25 09:00:00	1995-11-16 02:15:00	1988-07-22 10:30:00	2012-01-05 00:15:00	2007-01-03 15:30:00	1900-08-24 12:00:00	wwsww	139	1995-03-25 09:00:00	1992-05-13 00:45:00	2012-01-05 00:15:00	2012-11-22 19:15:00	1995-11-16 02:15:00	1900-03-28	wswww	142
17018	2000-12-12 07:00:00	2014-10-28 11:00:00	2013-10-22 03:15:00	2019-08-09 14:30:00	2002-09-08 12:00:00	1900-10-22	wwwss	125	2000-12-12 07:00:00	2009-11-01 15:30:00	2013-10-22 03:30:00	2014-10-28 11:00:00	2002-09-08 12:00:00	1900-10-22	wwwwss	126
19005	2021-07-04 15:45:00	2000-07-28 18:45:00	2009-06-14 16:45:00	2013-07-23 19:00:00	2002-07-30 13:00:00	1900-07-29	sssss	76	2002-07-30 14:45:00	2021-07-04 15:45:00	2008-08-10	2000-08-02 16:00:00	2009-06-14 16:45:00	1900-08-10	sssss	107
14002	2021-07-28 00:15:00	1991-11-18 20:30:00	2002-07-30 23:15:00	2004-08-16 17:00:00	2008-08-13	1900-08-15 12:00:00	swsss	77	2021-07-28 00:15:00	2004-08-16 17:00:00	2019-08-10 22:45:00	2009-09-04 08:30:00	2002-07-30 23:15:00	1900-08-17	sssss	109
79002	2001-05-14 14:30:00	1999-01-13 11:45:00	2000-02-10 11:00:00	1988-12-18 20:30:00	1963-09-26 04:45:00	1900-09-21 12:00:00	swwws	118	2000-02-10 11:00:00	1967-02-27 14:15:00	1999-01-13 11:45:00	1972-12-11 18:45:00	1962-08-03 17:30:00	1900-10-01	wwwws	121
8008	2005-01-01 14:15:00	2009-08-20 10:00:00	2018-09-18 00:30:00	2007-06-22 17:15:00	2015-06-01 21:15:00	1900-09-07 12:00:00	wssss	97	1993-01-17 09:00:00	2002-07-30 18:45:00	2009-08-20 10:00:00	2005-11-07 23:00:00	2005-01-01 14:15:00	1900-08-24	wssww	110
77003	1993-11-09 17:45:00	2002-08-02 14:30:00	1997-11-18 11:00:00	2012-08-04 17:15:00	2019-07-27 16:30:00	1900-08-10	wswss	94	2002-08-02 14:30:00	1988-07-22 05:15:00	2004-08-09 17:45:00	2008-08-01 09:30:00	2000-07-09 20:45:00	1900-08-05	sssss	115
2001	1980-07-26 04:45:00	1978-02-23 02:45:00	1981-12-13 16:30:00	2001-02-11 14:30:00	1988-10-26 04:15:00	1900-08-31	swwww	118	1980-07-26 05:00:00	1978-02-23 02:45:00	2001-02-11 14:30:00	1988-01-20 11:45:00	1980-11-24 17:15:00	1900-10-04	swwww	120
15024	1994-08-03 21:30:00	1997-11-16 16:00:00	1992-02-12 13:45:00	2002-07-30 15:30:00	2011-09-21 12:15:00	1900-08-07 12:00:00	swwss	73	2007-07-14 01:30:00	2004-08-18 17:15:00	1992-02-12 13:45:00	2002-07-30 15:30:00	1997-05-18 16:00:00	1900-09-04	sswss	98
96003	1998-06-27 18:15:00	2010-12-28 13:30:00	1996-01-02 06:45:00	1985-12-31 15:00:00	2005-06-13 04:15:00	1900-07-01	swwws	100	1998-06-27 18:30:00	2010-12-28 13:30:00	1996-01-02 06:45:00	1985-12-31 15:00:00	1989-04-12 04:30:00	1900-08-01	swwww	108
83006	2001-07-04 05:30:00	2008-08-01 12:30:00	1987-06-06 08:45:00	2012-06-22 13:30:00	2007-07-26 10:15:00	1900-08-24	sssss	70	2001-07-04 05:30:00	2007-07-26 10:15:00	2007-10-04 01:45:00	2000-09-20 06:00:00	2012-06-22 13:30:00	1900-10-03	sswss	76
18001	2003-03-02 07:15:00	1997-05-04 11:45:00	2015-07-17 05:45:00	2011-09-25 20:00:00	2015-10-28 16:45:00	1900-08-10	wsssw	88	2003-03-02 07:15:00	2015-07-17 05:45:00	1994-12-28 18:45:00	2004-10-21 08:15:00	2015-10-28 16:45:00	1900-09-08	wswww	97
89004	2004-05-10 19:00:00	2003-04-01 01:30:00	2010-04-05 06:30:00	2013-10-03 01:30:00	2006-01-09 19:15:00	1900-07-22 12:00:00	swwww	93	1995-07-20 05:30:00	1997-04-23 15:45:00	1995-10-02 19:15:00	1999-06-19 14:30:00	1997-12-05 22:15:00	1900-08-30	swwsw	112
19006	2004-08-11 22:00:00	2000-08-02 17:00:00	2009-07-16 19:30:00	2014-05-25 12:45:00	2007-07-23 21:45:00	1900-07-23	sssss	74	2004-08-11 22:00:00	2011-07-16 19:00:00	2019-06-24 15:30:00	2000-08-02 17:15:00	2021-07-04 16:45:00	1900-07-16	sssss	91
6008	1981-11-20 06:45:00	1992-01-06 11:15:00	2015-12-04 19:15:00	1990-12-28 12:00:00	1999-01-15 11:45:00	1900-08-19	wwwww	126	1980-07-27 09:00:00	2015-03-07 05:30:00	2006-12-01 01:15:00	1990-02-05 02:15:00	1994-03-05 01:00:00	1900-10-01	swwww	133
14005	1993-10-07 12:30:00	1998-04-03 11:45:00	1992-03-31 16:15:00	2009-11-01 17:45:00	2002-12-01 11:15:00	1900-10-11 12:00:00	wwwww	122	1993-10-07 12:30:00	1993-01-15 17:00:00	1992-04-01 04:15:00	2008-08-13 19:00:00	2012-12-21 04:15:00	1900-10-06	wwwsw	124
21007	1967-07-14 15:45:00	1963-03-05 19:45:00	2008-05-10 18:45:00	2020-03-03 17:15:00	1983-10-04 07:45:00	1900-08-06 12:00:00	swsww	84	2003-05-30 16:45:00	1963-03-05 19:45:00	1976-01-02 20:15:00	1967-07-14 15:45:00	1975-05-13 19:45:00	1900-08-14 12:00:00	swwss	111
84019	2001-07-03 22:45:00	2005-06-30 17:00:00	2020-08-12 05:15:00	2016-07-20 08:45:00	1995-07-14 12:30:00	1900-08-06	sssss	60	2000-09-12 08:45:00	2001-07-03 22:45:00	1992-05-21 08:00:00	2003-11-29 19:15:00	2020-08-12 05:15:00	1900-08-06	sssws	95
11003	1982-08-07 06:15:00	1999-07-10 19:15:00	1995-12-30 19:15:00	1985-01-27 18:15:00	1984-09-23 21:45:00	1900-08-06 12:00:00	sswws	80	1995-12-30 19:15:00	1982-08-07 06:15:00	1999-07-10 19:15:00	2004-08-19 03:30:00	1985-01-27 18:15:00	1900-09-04	wsssw	88
79003	1993-03-18 14:30:00	1988-12-18 16:45:00	1988-02-01 09:00:00	2005-11-07 20:45:00	2015-06-01 18:45:00	1900-08-10	wwwws	109	1993-03-31 13:30:00	2013-12-30 11:00:00	1988-02-01 09:00:00	1988-12-18 16:45:00	2015-12-30 12:00:00	1900-08-22	wwwww	119
2002	2013-02-05 15:15:00	2014-08-11 08:30:00	2006-10-02 05:30:00	2014-10-07 18:00:00	2002-02-22 00:45:00	1900-09-24 12:00:00	wswww	105	2013-02-05 15:15:00	2014-08-11 10:00:00	2005-11-26 02:15:00	2006-10-26 07:15:00	2002-01-28 14:15:00	1900-08-31 12:00:00	wswww	131
77004	2002-09-07 07:15:00	2010-08-10 13:45:00	1995-10-03 06:00:00	2009-07-27 07:30:00	1989-09-21 07:15:00	1900-08-14	sswss	73	2007-06-28 19:30:00	2004-08-08 23:30:00	2002-08-02 15:15:00	2000-08-18 02:00:00	2011-07-16 09:00:00	1900-08-19	sssss	94
15025	2007-10-28 06:45:00	2005-06-19 09:30:00	2020-07-27 18:30:00	1995-10-03 03:00:00	2018-06-16 22:30:00	1900-08-19	wssws	79	2014-10-06 12:15:00	1995-10-03 03:00:00	2004-12-23 08:30:00	2007-11-28 20:00:00	2004-05-09 20:45:00	1900-09-05 12:00:00	wwwws	94
18002	2002-07-30 20:00:00	2004-08-09 18:00:00	2009-09-10 09:30:00	1992-10-01 08:45:00	2020-08-04 18:30:00	1900-09-10	sssws	90	2004-08-09 18:00:00	2002-07-30 20:45:00	2020-08-04 18:30:00	2012-08-29 18:00:00	2009-11-19 08:45:00	1900-08-30	ssssw	116
96004	2002-09-25 14:15:00	2013-06-22 18:00:00	2006-07-11 07:15:00	2011-07-16 13:30:00	2007-07-03 14:45:00	1900-08-25	sssss	78	2016-07-20 04:45:00	2017-08-25 16:00:00	1995-09-08	2015-08-10 18:15:00	2014-08-11 04:45:00	1900-08-25	sssss	95
19007	2004-08-09 22:00:00	2012-08-29 17:45:00	2011-07-16 20:45:00	2014-06-04 17:15:00	1993-10-06 04:45:00	1900-07-16	ssssw	73	2012-08-29 17:45:00	2004-08-09 22:00:00	2000-04-26 22:15:00	1993-10-07 17:00:00	2001-02-06 18:45:00	1900-07-16	sswww	113
6011	2018-06-02 18:30:00	2012-06-28 18:30:00	2004-05-09 19:30:00	2006-09-01 08:00:00	2016-08-07 17:30:00	1900-08-10 12:00:00	sssss	84	2012-06-28 18:45:00	2016-08-07 17:30:00	2000-08-02 18:30:00	2018-06-02 18:30:00	2004-08-17 20:00:00	1900-08-05 12:00:00	sssss	104
14009	2009-07-06 10:30:00	2016-08-03 07:00:00	2005-06-04 16:00:00	2005-10-24 13:00:00	2001-10-08 00:30:00	1900-08-17	sssww	103	2000-04-26 21:15:00	2005-10-24 13:00:00	1999-09-23 05:00:00	1993-01-15 09:45:00	2005-06-04 16:00:00	1900-08-26 12:00:00	wwsws	116
83007	2005-09-23 08:30:00	2014-05-19 21:45:00	1992-08-30 14:30:00	2004-05-10 00:30:00	2010-01-15 20:45:00	1900-06-29	ssssw	88	1992-08-30 14:30:00	2005-09-23 08:30:00	2019-07-31 18:45:00	2014-05-19 21:45:00	2011-02-07 07:15:00	1900-06-19	sssss	111
21008	2005-06-28 04:00:00	2013-04-14 12:15:00	2009-03-08 03:00:00	2007-06-16 22:15:00	2016-12-23 17:00:00	1900-08-20	swwsw	108	2005-06-28 04:00:00	1991-02-24 03:00:00	2020-02-15 23:15:00	2007-06-16 22:15:00	2016-12-23 17:00:00	1900-03-10	swwsw	128
89005	2000-09-06 04:45:00	2004-10-06 05:45:00	1995-03-23 09:00:00	2006-09-01 05:30:00	2011-02-03 18:00:00	1900-08-11 12:00:00	swwsw	101	2014-10-28 05:45:00	2004-10-06 05:45:00	2010-10-29 18:00:00	1983-12-27 12:45:00	2010-09-13 15:30:00	1900-10-09	wwwws	127
11004	1990-11-18 03:00:00	2002-09-07 17:30:00	2013-11-03 06:45:00	2020-10-22 06:30:00	2010-11-19 06:15:00	1900-09-09	wswww	90	1995-09-08 09:00:00	2009-11-02 00:15:00	2016-01-08 00:30:00	1990-11-18 03:00:00	2015-07-07 16:45:00	1900-09-04	swwws	98
6012	2009-07-06 18:45:00	2016-07-20 05:00:00	2011-06-07 20:45:00	2012-02-04 15:30:00	2021-02-15 04:30:00	1900-07-08 12:00:00	sssww	90	2016-07-20 05:00:00	2009-02-15 03:45:00	2011-01-13 09:15:00	2010-01-16 12:00:00	2014-02-26 14:45:00	1900-05-09 12:00:00	swwww	138
96005	2015-08-10 19:00:00	2010-12-10 15:00:00	2016-11-16 03:45:00	2010-09-20 03:00:00	2011-11-23 05:15:00	1900-08-17	swwsw	77	2010-12-10 15:00:00	2016-11-16 03:45:00	2015-08-10 19:15:00	2011-11-23 05:15:00	2007-12-07 04:30:00	1900-09-15 12:00:00	wwsww	78
79004	2007-06-12 15:30:00	2008-05-10 18:45:00	2015-07-17 05:15:00	2013-10-03 00:45:00	1988-07-10 03:45:00	1900-08-04	sssws	75	1990-06-06 16:45:00	2001-07-03 23:45:00	2015-07-17 05:15:00	2014-03-20 11:45:00	2007-06-12 15:30:00	1900-08-23	sssws	100
15028	2013-05-03 17:45:00	2021-05-12 19:00:00	2015-07-17 05:45:00	2020-02-08 22:00:00	2008-12-12 21:30:00	1900-07-24	sssww	122	2004-08-11 11:15:00	1993-01-15 10:30:00	2005-01-08 09:30:00	2002-02-01 13:15:00	1999-12-25 01:30:00	1900-07-25 12:00:00	swwww	130
8009	1981-09-18 10:15:00	2016-06-07 19:00:00	1990-06-07 01:30:00	2005-09-01 00:15:00	1998-08-10 22:00:00	1900-08-30	sssss	103	1981-09-20 10:30:00	1958-08-11 02:45:00	1985-12-01 07:15:00	1990-06-07 01:30:00	1963-03-05 22:15:00	1900-08-10 12:00:00	sswsw	115
78003	1989-08-21 01:00:00	2016-12-23 15:00:00	1990-10-03 00:15:00	2005-10-24 11:45:00	2000-10-25 00:15:00	1900-07-31	swwww	73	2013-04-14 12:30:00	1999-07-10 18:15:00	2015-06-01 22:00:00	2007-10-28 11:45:00	2004-08-18 20:00:00	1900-09-06	wssws	109
18003	2001-07-04 02:30:00	2004-08-18 18:30:00	1992-08-03 04:00:00	2019-08-09 14:00:00	2016-09-13 04:30:00	1900-08-09	sssss	82	2004-08-18 18:45:00	2001-07-04 02:30:00	2010-09-09 12:15:00	2005-11-11 06:15:00	2008-08-01 11:00:00	1900-08-15	sssws	97
96006	2019-07-11 16:00:00	2012-01-21 05:30:00	2014-10-28 05:30:00	2017-06-06 21:30:00	2016-01-08 03:00:00	1900-08-28	swwsw	109	2014-08-11 06:00:00	2019-07-11 16:00:00	2012-01-21 05:30:00	2021-08-04 23:15:00	2008-09-01 15:30:00	1900-08-11	sswss	117
3002	2004-09-12 06:15:00	2017-11-07 00:30:00	2016-08-08 02:45:00	2011-09-06 12:00:00	1975-07-15 01:00:00	1900-09-06	swsss	86	2018-10-23 04:45:00	2017-11-07 00:30:00	2014-10-07 14:00:00	2016-08-08 02:45:00	2005-12-15 19:45:00	1900-09-26	wwwsw	98
84020	2019-07-31 20:00:00	2015-10-06 10:30:00	2007-06-22 19:15:00	2009-05-09 14:00:00	2002-08-15 04:00:00	1900-08-26	swsss	68	2002-07-30 16:45:00	1991-01-01 16:45:00	1984-10-29 10:00:00	1986-08-16 03:00:00	2009-05-09 14:00:00	1900-09-20	swwss	77
19010	2011-07-08 13:45:00	2018-07-28 10:00:00	2013-07-27 16:45:00	2016-06-10 04:45:00	2000-07-27 15:00:00	1900-07-28	sssss	42	2021-07-04 17:00:00	2011-07-08 13:45:00	2014-05-25 12:30:00	2020-08-11 22:00:00	2012-08-29 14:00:00	1900-07-26	sssss	62
15003	2002-07-30 04:30:00	2010-09-29 16:15:00	2009-08-20 14:15:00	2005-11-11 12:00:00	1997-11-18 06:30:00	1900-09-21 12:00:00	sssww	92	2005-11-11 12:00:00	1993-01-17 06:15:00	1997-02-17 23:30:00	2003-11-29 18:30:00	2002-07-30 04:30:00	1900-09-25 12:00:00	wwwws	105
6013	2013-06-22 13:45:00	2020-06-26 15:30:00	2019-08-07 01:15:00	2021-07-04 15:30:00	2004-06-20 14:00:00	1900-07-21	sssss	64	2002-09-08 03:00:00	2019-08-07 01:15:00	1998-11-14 15:30:00	2009-07-02 15:30:00	2016-05-21 12:00:00	1900-07-13	sswss	88
11006	2007-06-21 19:00:00	2011-06-21 04:45:00	2004-01-01 09:00:00	1999-07-10 14:45:00	2019-07-10 19:45:00	1900-07-22 12:00:00	sswss	84	2009-11-02 01:15:00	2021-02-21 00:30:00	1999-07-10 14:45:00	2007-06-22 19:00:00	2001-08-19 21:30:00	1900-08-04	wwsss	89
15030	1992-08-31 10:45:00	2020-10-04	2002-07-31 04:30:00	2001-01-22 18:15:00	2006-10-26 07:30:00	1900-08-29 12:00:00	swsww	119	2016-01-07 15:45:00	2020-10-04	1992-08-31 10:45:00	1994-01-03 21:45:00	1993-01-15 12:00:00	1900-06-23	wwsww	125
83008	2005-05-19 13:15:00	2012-08-06 18:00:00	2016-11-16 08:15:00	2007-09-16 12:30:00	2004-04-15 11:15:00	1900-08-20 12:00:00	sswsw	96	1985-10-01 08:00:00	2000-07-29 21:15:00	1999-03-28 18:30:00	2005-05-19 13:15:00	2012-08-06 18:15:00	1900-08-17	wswss	103
8010	1989-01-13 22:00:00	1992-10-01 08:00:00	2012-10-12 16:15:00	2002-11-15 12:30:00	1988-08-13 01:00:00	1900-09-03	wwwws	76	1990-06-07 03:30:00	1989-01-13 22:00:00	1993-01-16 21:15:00	2015-12-05 05:45:00	2007-06-21 18:45:00	1900-09-01	swwws	109
78004	1989-05-03 10:15:00	2002-05-13 20:45:00	1996-05-22 17:00:00	1998-09-08 04:15:00	2005-04-06 04:00:00	1900-06-19	ssssw	87	1992-01-01 18:15:00	1989-05-03 10:15:00	2015-06-01 20:00:00	2014-03-20 14:45:00	2000-08-14 00:45:00	1900-07-23	wssws	101
89006	1991-04-11 05:00:00	1992-05-05 22:00:00	1998-02-12 11:15:00	2012-11-19 05:15:00	1980-08-11 14:45:00	1900-08-10	wswws	87	1991-04-11 05:00:00	1998-02-12 11:15:00	2018-09-15 12:30:00	1992-05-05 22:00:00	2019-09-08 10:15:00	1900-09-18	wwsss	111
18005	2011-09-25 21:00:00	1998-09-01 15:30:00	1998-12-08 05:00:00	2012-08-29 15:45:00	2008-08-01 12:00:00	1900-07-17	sswss	72	2011-09-25 21:00:00	2012-08-29 15:45:00	2006-06-20 22:15:00	1998-09-01 15:30:00	2016-04-01 19:30:00	1900-08-10	ssssw	88
19012	2000-08-02 17:00:00	2011-07-16 18:15:00	2004-08-11 21:00:00	2007-07-01 12:15:00	2005-03-30 13:45:00	1900-07-03 12:00:00	ssssw	84	2011-07-16 18:15:00	2004-08-11 21:00:00	2019-06-24 14:30:00	2000-08-02 17:15:00	2007-07-01 12:15:00	1900-08-07 12:00:00	sssss	113
79005	1979-10-19 08:45:00	1982-11-12 09:15:00	1970-08-16 10:00:00	1971-10-17 13:45:00	1987-04-10 19:00:00	1900-08-16	wwsww	80	1982-11-12 09:30:00	2018-08-12 22:30:00	1985-09-21 07:30:00	2020-06-16 21:45:00	1990-08-29 14:45:00	1900-09-20 12:00:00	wssss	100
21009	1985-12-21 09:30:00	2001-03-07 12:45:00	2011-10-18 01:30:00	1982-12-19 17:45:00	2016-12-23 22:15:00	1900-09-19	wwwww	106	1985-12-21 09:30:00	1982-01-11 11:30:00	1959-10-27 12:15:00	1962-08-04 06:45:00	1985-07-27 02:30:00	1900-10-11	wwwss	128
84022	1992-11-12 10:45:00	2020-06-17 22:00:00	2000-08-09 15:30:00	1994-08-24 18:30:00	1988-08-18 06:00:00	1900-08-09	wssss	80	2007-06-22 17:45:00	2010-12-28 13:00:00	1988-08-18 06:00:00	2010-01-15 19:30:00	1999-05-12 17:15:00	1900-08-05	swsws	108
3003	2014-08-29 15:30:00	2015-08-10 17:30:00	2012-08-21 20:30:00	2013-07-29 19:30:00	2001-01-24 14:15:00	1900-08-10	ssssw	92	2015-08-10 17:45:00	1978-10-05 11:30:00	1990-03-10 13:15:00	2013-07-29 19:30:00	2014-08-29 15:30:00	1900-09-11	swwss	96
15034	2009-07-02 19:30:00	2014-07-06 22:30:00	2005-09-01 00:15:00	2019-07-24 07:30:00	2018-09-16 06:00:00	1900-09-05	sssss	69	2002-07-30 20:00:00	2018-09-16 06:00:00	2010-10-29 21:15:00	2011-10-29 18:00:00	2015-12-22 09:15:00	1900-09-21	sswww	69
97002	2010-12-28 10:15:00	1978-02-23 05:00:00	1985-12-31 15:15:00	2010-01-14 12:30:00	2014-08-11 04:45:00	1900-09-24	wwwws	125	2006-10-26 14:00:00	1978-02-23 05:00:00	2010-01-14 12:30:00	2010-12-28 10:15:00	1985-12-31 15:15:00	1900-08-14 12:00:00	wwwww	137
8011	2016-06-24 16:45:00	2001-06-27 19:30:00	2002-08-06 13:45:00	2005-06-03 20:45:00	1999-07-10 15:45:00	1900-08-08	sssss	46	2002-08-06 13:45:00	2004-08-19 02:00:00	2014-08-11 06:00:00	2001-06-27 19:30:00	1999-07-10 15:45:00	1900-08-11 12:00:00	sssss	62
18008	2016-01-29 06:45:00	2020-01-07 20:15:00	2021-10-26 22:30:00	2008-12-19 16:45:00	1993-01-17 02:45:00	1900-10-05	wwwww	137	1993-01-17 03:00:00	2016-01-29 06:45:00	2000-06-13 06:15:00	2013-05-09 08:45:00	2011-12-08 10:00:00	1900-06-14	wwssw	133
78005	2012-08-27 15:15:00	2004-08-08 23:30:00	2015-06-01 21:00:00	1990-06-06 18:15:00	1994-09-06 13:15:00	1900-08-04	sssss	81	1992-08-03 06:00:00	2012-08-27 15:15:00	1990-06-06 18:30:00	2015-06-01 21:00:00	2004-08-08 23:30:00	1900-08-02	sssss	93
15006	1962-09-30 10:30:00	2014-10-06 16:30:00	1952-11-07 00:45:00	1981-09-18 12:30:00	2000-09-20 08:45:00	1900-10-05	swwss	97	1993-01-17 13:30:00	2003-11-29 19:15:00	1990-01-10 15:15:00	2005-11-11 14:30:00	2006-12-13 18:45:00	1900-10-03	wwwww	94
19014	2013-07-23 19:30:00	2010-06-05 17:45:00	2016-07-20 08:30:00	2006-07-26 06:15:00	2002-07-30 13:45:00	1900-07-27 12:00:00	sssss	43	2002-07-30 13:45:00	2008-08-10 00:15:00	2013-07-23 19:30:00	2020-08-27 17:30:00	2014-05-25 13:15:00	1900-08-06 12:00:00	sssss	58
12001	2007-10-28 12:30:00	1989-09-20 17:45:00	2019-07-24 20:00:00	1993-10-01 13:00:00	1990-01-10 18:45:00	1900-09-18	wssww	88	2015-12-30 14:30:00	1981-10-03 01:30:00	1989-09-20 17:45:00	2002-07-31 03:45:00	1990-01-10 18:45:00	1900-09-24	swwssw	93
89007	2007-06-12 18:45:00	1991-10-16 01:45:00	2000-09-06 04:15:00	1994-02-01 09:00:00	1986-08-13 22:30:00	1900-08-17	swsws	76	1983-10-15 06:45:00	2007-06-12 18:45:00	2017-08-23 04:15:00	1988-09-06 18:45:00	1991-10-16 01:45:00	1900-09-07	wsssw	98
83009	2020-09-30 11:15:00	1991-08-08 07:00:00	2019-08-30 02:45:00	2016-03-01 01:15:00	2005-09-19 16:30:00	1900-08-15	sssws	77	1987-12-27 13:45:00	1983-10-15 08:00:00	1986-08-13 23:15:00	2020-09-30 11:15:00	2016-03-01 01:15:00	1900-08-14	wwssw	93
7001	1994-08-04 02:15:00	2019-08-01 02:15:00	1986-08-14 07:15:00	2016-07-20 07:45:00	2005-08-31 22:30:00	1900-09-17	sssss	86	2014-08-11 07:45:00	2014-11-14 18:15:00	2005-08-31 22:30:00	1980-07-26 04:30:00	2019-08-01 02:15:00	1900-09-09 12:00:00	swsss	96
105001	2010-01-15 08:30:00	2008-04-25 23:30:00	2016-02-16 11:15:00	2019-02-15 22:15:00	2012-02-04 13:30:00	1900-05-27	wwwww	115	2010-01-15 08:30:00	2016-09-24 09:00:00	2001-06-19 12:30:00	2010-12-04 21:00:00	2001-10-29 03:30:00	1900-09-14	wssww	123
21011	2008-05-10 17:30:00	2003-05-30 15:45:00	1997-06-13 16:15:00	2007-06-22 18:00:00	2004-08-09 17:15:00	1900-08-06	sssss	74	2003-05-30 15:45:00	2008-05-10 17:30:00	2005-01-08 06:45:00	2015-12-30 12:00:00	2009-11-19 20:45:00	1900-07-11 12:00:00	sswww	134
15039	2014-07-06 21:00:00	2018-06-03 15:30:00	2002-08-06 20:00:00	2021-08-06 12:00:00	2005-06-19 06:00:00	1900-08-06	sssss	63	2019-07-24 07:15:00	2014-07-06 21:00:00	2015-08-10 17:00:00	2004-08-06 03:00:00	2005-06-19 06:00:00	1900-08-28 12:00:00	sssss	82
8013	2015-07-17 08:30:00	2005-08-24 07:15:00	2015-10-24 09:00:00	2020-07-27 17:45:00	2012-08-05 22:30:00	1900-08-26	sswss	51	2015-12-30 12:15:00	2016-12-23 19:30:00	2019-07-24 08:45:00	2015-07-17 08:30:00	2002-07-30 20:30:00	1900-08-29 12:00:00	wwsss	101
18010	2018-09-18 23:30:00	2017-09-25 09:00:00	2018-10-10 10:00:00	2019-10-07 21:30:00	2012-12-28 12:00:00	1900-09-16	sswww	100	2018-10-10 10:00:00	2018-09-18 23:30:00	2017-09-25 09:00:00	2008-02-21 22:45:00	2006-09-07 11:00:00	1900-09-07	wssws	106
3004	2006-07-11 09:15:00	2013-04-16 20:45:00	2011-07-16 15:15:00	2019-07-31 10:45:00	2001-05-29 03:00:00	1900-08-02	swsss	90	2014-08-06 18:00:00	2019-07-31 10:45:00	2006-07-11 09:15:00	2001-05-29 03:00:00	2010-12-30 11:45:00	1900-08-02	ssssw	95
15007	2009-08-20 11:15:00	1997-11-18 03:15:00	1991-12-22 10:45:00	2004-10-21 11:00:00	2005-11-11 08:30:00	1900-08-23	swwww	102	2004-08-11 10:30:00	1993-01-16 23:00:00	2002-07-30 19:00:00	2015-07-17 07:30:00	2004-10-21 11:00:00	1900-09-20 12:00:00	swssw	119
78006	2002-07-30 18:15:00	1995-01-31 07:00:00	2015-06-01 19:15:00	1988-02-01 11:30:00	2005-08-24 07:15:00	1900-08-09	swsws	104	1995-01-31 07:00:00	1997-11-18 06:45:00	1991-11-10 20:30:00	1996-10-27 05:15:00	1995-10-24 21:15:00	1900-10-21	wwwww	125
79006	1968-09-12 09:45:00	2001-07-04 00:45:00	1972-11-09 15:00:00	1982-10-26 13:30:00	2015-06-01 20:00:00	1900-09-15 12:00:00	sswws	93	2001-07-04 01:00:00	1985-09-21 07:45:00	2018-11-29 12:15:00	2003-01-17 05:30:00	1967-10-20 09:15:00	1900-10-04 12:00:00	sswww	114
15046	2019-07-11 21:30:00	2011-07-16 16:15:00	2012-08-21 18:15:00	2015-07-17 04:30:00	2010-07-14 23:45:00	1900-07-17	sssss	88	2015-12-04 23:30:00	2019-07-11 21:30:00	2011-01-15 13:45:00	2013-01-29 00:30:00	2020-02-15 18:30:00	1900-07-14	wswww	121
84023	1991-08-09 04:00:00	2000-08-02 16:45:00	1989-10-31 07:45:00	2003-01-26 05:00:00	1998-04-29 21:00:00	1900-08-09	sswww	81	2019-08-31 10:00:00	2005-06-30 17:15:00	1988-08-18 16:00:00	1993-03-17 04:00:00	1992-08-12 23:15:00	1900-08-07	sssws	86
106001	1998-07-21 20:15:00	2011-10-24 01:15:00	2000-10-03 20:45:00	1998-11-06 18:30:00	2013-12-05 05:00:00	1900-10-04	swwww	118	1998-07-21 21:00:00	2010-01-16 07:45:00	2007-08-06 22:00:00	2011-10-24 01:15:00	2000-02-10 03:45:00	1900-10-15	swsww	126
19017	2021-07-04 16:15:00	2016-06-25 00:45:00	2006-07-02 14:30:00	2000-08-02 16:30:00	1995-07-14 13:30:00	1900-07-29 12:00:00	sssss	52	2021-07-04 16:15:00	2019-06-24 14:00:00	2000-08-02 16:30:00	2016-06-25 00:45:00	2011-07-08 14:15:00	1900-07-11	sssss	83
3006	2014-08-11 06:15:00	2013-09-03 10:00:00	2008-03-21 14:30:00	2021-11-18 04:45:00	2016-12-23 20:15:00	1900-08-22 12:00:00	sswww	122	2014-08-11 06:15:00	2013-09-03 10:00:00	2018-10-23 03:00:00	2012-01-12 01:00:00	2021-11-18 04:45:00	1900-09-15	sswww	129
89008	2018-06-03 17:30:00	2003-07-19 13:00:00	2012-06-26 16:15:00	2014-08-03 15:00:00	2021-08-08 14:45:00	1900-08-27	sssss	76	2012-06-26 16:15:00	2002-08-15 02:00:00	2004-08-09 08:30:00	1985-10-04 03:45:00	2005-08-31 17:30:00	1900-08-20	sssws	98
12002	1982-08-07 04:00:00	1993-10-01 15:30:00	1990-01-10 20:15:00	1989-09-20 19:30:00	2000-01-31 04:00:00	1900-09-10 12:00:00	swwsw	99	1982-09-25 02:30:00	1993-10-01 15:30:00	2002-07-31 05:30:00	2014-10-06 17:45:00	1992-02-27 20:45:00	1900-09-22 12:00:00	swsww	107
106002	2021-09-09 12:45:00	2014-10-03 01:30:00	2013-08-02	2016-09-23 16:45:00	2007-10-26 07:15:00	1900-09-26	swssw	67	2013-10-22 19:45:00	2011-11-22 23:45:00	2015-03-28 07:00:00	2019-08-28 02:45:00	2013-08-02	1900-09-17	wwwss	59
83010	2003-05-30 15:30:00	1995-09-13 16:30:00	1997-09-14 04:30:00	2002-08-06 23:45:00	2001-07-04 00:30:00	1900-09-09	sssss	79	1987-12-26 06:45:00	2007-12-02 00:30:00	1990-03-06 03:45:00	2003-09-22 00:15:00	1985-09-21 03:30:00	1900-09-21	wwwss	102
18011	2012-07-18 10:15:00	2004-10-21 08:30:00	2002-07-30 19:00:00	2018-01-03 16:45:00	1993-01-15 09:30:00	1900-08-05	swsww	84	2004-08-18 19:30:00	2008-08-01 11:45:00	2002-07-30 19:00:00	2001-07-04 03:45:00	2016-03-01 02:15:00	1900-08-04	ssssw	102
21012	2000-07-09 18:30:00	1988-07-10 07:30:00	2013-04-14 08:15:00	2002-08-30 15:15:00	2004-08-09 17:30:00	1900-08-15	sswss	66	2007-06-16 18:15:00	2013-04-14 08:15:00	2000-07-09 18:30:00	2004-08-09 17:45:00	2016-01-27 09:15:00	1900-08-18	swssw	115
15010	2021-08-06 13:15:00	2007-10-28 07:00:00	2014-10-06 13:00:00	2009-06-17 14:45:00	2013-12-05 11:30:00	1900-09-21 12:00:00	swwsw	57	2020-08-12 06:15:00	2021-08-06 13:15:00	2021-10-31 16:30:00	2015-07-17 08:00:00	2007-10-28 07:00:00	1900-09-23 12:00:00	sswsw	65
16001	2004-09-13 03:30:00	2012-08-04 22:00:00	2020-09-30 15:45:00	2019-02-08 11:15:00	2015-07-17 06:45:00	1900-08-04	sssws	77	1991-01-01 19:45:00	2005-06-19 09:30:00	2004-09-13 03:30:00	1992-05-12 01:30:00	2012-08-04 22:00:00	1900-08-05	wssss	77
106003	2011-08-04 08:30:00	2013-07-26 14:15:00	2012-08-07 12:15:00	2014-07-31 07:30:00	2010-07-01 09:00:00	1900-08-08	sssss	37	2017-08-23 00:30:00	2021-11-12 10:30:00	2019-08-28 01:00:00	2014-10-19 04:00:00	2020-10-31 08:15:00	1900-08-23	swsww	51
19020	1998-09-02 16:45:00	2021-08-09 13:30:00	2019-08-07 18:30:00	2008-08-19 22:00:00	2018-09-19 11:00:00	1900-08-04	sssss	64	1997-08-13 16:30:00	2020-08-04 15:30:00	2003-09-21 23:30:00	1998-09-02 16:45:00	2010-10-30 01:15:00	1900-08-10	ssssw	83
80001	1999-07-10 21:30:00	1995-03-01 06:15:00	2003-01-17 07:15:00	1992-03-09 12:15:00	1995-10-13 00:15:00	1900-06-22	swwww	95	1999-07-10 21:30:00	2015-12-30 12:00:00	2001-07-04 02:45:00	2019-12-10 18:00:00	2011-01-11 04:00:00	1900-07-10	swsww	121
7002	1990-06-07 03:30:00	1980-07-26 09:00:00	2011-07-07 03:15:00	2005-09-01 03:15:00	2006-07-03 10:00:00	1900-09-21	sssss	89	1990-06-07 03:30:00	2014-08-17 21:30:00	1980-07-26 09:00:00	2016-01-26 16:30:00	1958-09-07 02:00:00	1900-09-18	sssws	97
84025	2000-08-02 15:45:00	2001-07-04 01:15:00	2010-12-28 06:30:00	2002-07-30 16:00:00	2016-07-20 10:30:00	1900-08-14	sswss	67	2010-12-28 06:30:00	1986-12-30 11:45:00	2002-07-30 16:00:00	1988-11-30 01:45:00	2001-07-04 01:15:00	1900-08-14	wwsws	100
83011	2000-09-11 07:45:00	2001-07-03 23:15:00	2021-12-08 12:45:00	1999-05-12 12:45:00	2017-10-04 09:45:00	1900-10-09	sswsw	67	2010-01-16 08:30:00	2000-10-25 02:15:00	1994-01-14 01:00:00	2000-09-20 05:30:00	1994-12-08 07:15:00	1900-10-09	wwwsw	87
90003	2021-08-11 16:45:00	2012-06-28 19:30:00	2013-04-14 01:45:00	2014-10-03 05:30:00	2007-07-14 02:30:00	1900-08-23 12:00:00	sswws	78	2008-07-31 04:30:00	2001-09-12 11:30:00	2001-10-01	1995-07-19 17:00:00	2020-01-02 13:15:00	1900-09-10	sswsw	87
18013	1998-07-31 22:30:00	1996-03-12 00:45:00	2011-02-04 20:30:00	2004-10-25 01:00:00	2020-08-12 07:45:00	1900-08-13	swwws	70	2011-02-04 20:30:00	2004-10-25 01:00:00	2020-08-12 07:45:00	1999-11-28 11:45:00	1993-01-23 21:15:00	1900-09-24	wwsww	95
9001	2009-07-06 23:00:00	1977-08-26 14:30:00	2013-10-10 01:30:00	1992-08-30 17:00:00	2007-06-24 00:30:00	1900-08-26	sswss	78	1962-01-05 20:15:00	1970-08-16 14:00:00	2009-07-06 23:00:00	1972-05-27 16:15:00	1977-08-26 14:30:00	1900-08-26	wssss	79
4001	1979-02-26 15:30:00	2010-11-03 12:45:00	1982-10-01 09:00:00	1987-01-13 17:00:00	2016-01-29 09:30:00	1900-06-18	wwwww	130	1979-02-26 15:30:00	1980-12-14 18:30:00	1981-10-28 17:30:00	1979-10-22 07:45:00	1982-10-01 09:00:00	1900-05-04	wwwww	141
107001	2007-12-03 12:00:00	2017-06-07 12:30:00	2015-01-13 00:15:00	2012-10-20 05:15:00	2006-10-26 15:15:00	1900-09-01 12:00:00	wswww	112	2005-03-16 09:00:00	2017-06-07 12:30:00	2006-10-26 15:15:00	2013-11-03 06:45:00	2011-08-28 13:00:00	1900-09-15	wswws	115
15011	2007-06-22 16:15:00	2015-11-08 15:00:00	2009-07-03 20:15:00	1994-08-23 10:15:00	2012-08-17 09:45:00	1900-07-23 12:00:00	swsss	84	2002-07-30 17:00:00	1997-02-19 16:45:00	2007-06-22 16:15:00	2004-08-09 11:45:00	2010-10-29 20:00:00	1900-08-23	swssw	109
16003	2001-07-04 01:15:00	2012-08-04 18:15:00	1992-08-03 02:45:00	1994-08-23 07:45:00	2014-08-02 20:30:00	1900-08-03	sssss	91	2012-08-04 18:30:00	2001-07-04 01:15:00	2015-11-08 15:00:00	2002-02-01 09:15:00	2015-07-17 03:15:00	1900-08-23	sswws	91
19021	2012-08-05 12:00:00	2013-05-20 18:15:00	2018-06-19 22:30:00	2006-07-02 14:45:00	2008-07-29 21:00:00	1900-07-16	sssss	57	1993-10-07 17:45:00	2000-04-26 20:00:00	2014-12-22 03:30:00	2011-10-17 15:45:00	2014-06-04 16:15:00	1900-08-10	wwwws	90
12003	1991-09-21 23:00:00	1990-09-07 00:15:00	1999-09-09 01:00:00	2020-07-27 21:15:00	2019-07-24 13:45:00	1900-08-25 12:00:00	sssss	90	1982-08-06 20:15:00	2021-02-20 20:00:00	2018-12-18 12:45:00	1990-09-07 00:15:00	2014-10-06 12:15:00	1900-09-08	swwsw	103
80002	1994-04-05 04:45:00	1988-02-24 15:30:00	1989-02-12 06:15:00	1990-08-23 05:30:00	1990-11-03 06:15:00	1900-06-05	wwwsw	117	1994-04-05 04:45:00	2007-12-27 08:30:00	2009-11-05 17:00:00	2008-12-05 08:30:00	2013-11-20 07:45:00	1900-08-04	wwwww	121
83013	2010-12-28 10:00:00	2012-08-06 14:30:00	2005-05-26 09:30:00	2015-11-12 18:00:00	2009-11-25 13:15:00	1900-10-08	wssww	74	2012-08-06 14:30:00	2005-05-26 09:30:00	2010-12-28 10:00:00	2009-11-25 13:15:00	2007-07-18 17:30:00	1900-09-30	sswws	101
7003	2004-08-19 11:30:00	2009-07-24 14:45:00	2015-09-02 01:15:00	2002-07-30 18:45:00	2014-08-11 03:30:00	1900-08-26	sssss	68	2004-08-19 11:30:00	2014-08-11 07:00:00	2004-10-17 16:45:00	2009-11-01 23:15:00	1997-07-01 10:30:00	1900-09-02	sswws	73
108001	2002-06-26 06:15:00	2006-05-24 19:15:00	2009-10-27 11:30:00	2008-11-04 15:30:00	2003-10-22 10:30:00	1900-09-07	sswww	94	2007-08-20 10:45:00	2005-08-31 23:45:00	2008-10-04 10:45:00	2010-07-11 06:15:00	2011-12-08 14:00:00	1900-09-25	sswsw	101
18014	2009-03-10 12:45:00	2004-01-11 06:15:00	2013-12-14 12:45:00	2002-07-30 19:00:00	1996-08-23 18:30:00	1900-07-02 12:00:00	wwwss	108	1993-01-16 12:30:00	2016-01-26 09:30:00	2008-01-05 21:15:00	1995-01-31 05:00:00	2002-07-30 19:00:00	1900-07-28 12:00:00	wwwws	127
21013	2002-01-03 16:45:00	1972-12-12 02:15:00	2012-08-29 15:00:00	1988-07-22 04:15:00	1974-01-05 17:15:00	1900-07-30	wwssw	92	1984-11-03 21:45:00	1972-12-12 02:15:00	2012-08-29 15:00:00	2002-01-03 16:45:00	1986-03-04 19:45:00	1900-09-24	wwsww	116
15012	2020-11-05 19:45:00	2000-02-27 06:45:00	2001-02-11 14:30:00	2015-12-30 04:00:00	1997-02-17 19:45:00	1900-10-16	wwwww	116	2006-11-20 01:00:00	1995-10-26 08:00:00	2001-10-15 19:00:00	2000-01-30 21:45:00	2008-03-08 13:30:00	1900-10-25	wwwww	121
84026	2021-07-04 14:00:00	1980-07-26 01:15:00	2004-08-17 14:30:00	2011-07-17 17:30:00	2008-07-03 15:30:00	1900-08-14	sssss	71	1998-09-02 17:30:00	2002-07-30 15:30:00	2000-09-24 17:30:00	1987-08-16	2011-07-17 17:30:00	1900-08-15	sssss	91
12004	2000-07-29 16:00:00	2020-08-12 06:00:00	2004-08-04 04:30:00	1996-07-23 16:30:00	1999-05-12 14:00:00	1900-08-04	sssss	101	1995-09-09 22:15:00	1993-01-15 05:15:00	1998-06-07 14:00:00	1996-01-08 23:15:00	2002-07-31 00:30:00	1900-07-17	swsws	113
20001	2020-08-12 02:15:00	2008-04-28 00:15:00	2000-08-28 11:45:00	2021-10-05 17:45:00	2014-06-04 18:15:00	1900-09-03	swsws	106	2020-08-12 02:15:00	1993-10-06 07:00:00	2014-06-04 18:30:00	2021-10-05 19:15:00	2000-10-09 22:00:00	1900-09-23	swsww	87
16004	1998-10-21 00:15:00	2015-07-17 08:45:00	2008-12-13 01:45:00	1993-03-29 22:15:00	2002-10-12 05:45:00	1900-08-20	wswww	86	2020-08-12 02:15:00	1999-11-28 11:30:00	1998-10-21 00:15:00	2000-10-29 13:00:00	2006-12-13 19:30:00	1900-08-15	swwww	121
91002	1998-12-15 05:45:00	1998-03-01 06:30:00	2006-10-06 02:45:00	1980-10-28 13:15:00	1992-01-01 04:45:00	1900-08-09	wwwww	87	2012-06-28 21:45:00	1998-12-15 06:00:00	1980-07-26 02:00:00	1998-03-01 06:30:00	2017-12-06 10:15:00	1900-09-27 12:00:00	swsww	115
80003	2006-07-31 18:45:00	2012-08-04 14:30:00	2007-07-19 13:45:00	2000-09-11 04:30:00	1991-09-21 14:15:00	1900-09-07	sssss	53	2012-08-04 14:30:00	2006-07-31 18:45:00	1992-08-02 23:45:00	1991-09-21 14:15:00	2002-09-07 14:30:00	1900-08-27	sssss	60
4003	1975-07-15	1977-08-25 08:15:00	1974-07-12 21:30:00	2019-07-10 14:30:00	1980-06-06 19:45:00	1900-08-06	sssss	64	1975-07-15	2019-07-10 14:30:00	1977-08-25 08:15:00	2012-08-06 23:15:00	2006-10-26 08:15:00	1900-08-17 12:00:00	ssssw	85
18020	2018-09-16 10:30:00	1997-12-10 14:00:00	2019-09-25 09:30:00	2009-07-03 15:15:00	2000-03-04 10:45:00	1900-08-17 12:00:00	swssw	93	2002-07-30 15:00:00	2019-08-09 12:45:00	2006-12-13 11:15:00	1998-10-20 20:15:00	1993-01-09 04:30:00	1900-08-01	sswww	108
9002	2009-07-07 04:00:00	1984-09-24 00:30:00	1977-08-26 19:15:00	1967-10-04 13:45:00	1972-05-27 23:30:00	1900-08-21	sssws	72	2009-11-01 21:45:00	1960-08-25 21:45:00	1972-05-27 23:30:00	1970-08-16 18:30:00	1960-11-04 07:30:00	1900-08-26	wsssw	76
7004	2006-08-01 21:45:00	2000-08-28 03:45:00	2011-07-16 16:45:00	1990-06-07 01:30:00	1981-09-20 08:15:00	1900-08-12	sssss	78	2006-08-01 21:45:00	1981-09-20 13:15:00	1981-10-03 03:30:00	1990-06-07 01:30:00	1990-10-28 19:30:00	1900-08-12 12:00:00	sswsw	97
21014	2004-08-09	2011-05-07 02:30:00	1996-07-03 11:30:00	2002-08-07 08:30:00	1997-10-10 04:15:00	1900-07-26	ssssw	48	2004-08-09	2015-12-30 08:45:00	1987-10-18 06:45:00	2013-12-30 10:45:00	1996-10-24 21:15:00	1900-08-15	swwww	123
15013	2006-09-01 12:30:00	2015-06-01 22:30:00	2021-03-10 01:15:00	1994-10-20 08:00:00	1993-10-01 12:15:00	1900-09-13	sswww	92	1993-10-01 12:15:00	2015-06-01 22:30:00	2006-11-19 22:30:00	2020-02-08 22:00:00	1993-01-15 09:30:00	1900-09-28	wswww	94
92001	2015-01-09 01:30:00	2002-01-28 05:30:00	2016-01-29 07:15:00	2010-11-08 07:00:00	1999-11-30 03:00:00	1900-10-19 12:00:00	wwwww	124	2020-10-15 14:45:00	2002-01-28 05:30:00	2011-12-08 15:15:00	2013-12-05 06:30:00	2016-12-26 06:15:00	1900-02-16	wwwww	138
20002	2011-10-17 17:45:00	2007-07-22 03:30:00	2011-02-07 08:15:00	2015-12-03 21:15:00	2008-01-10 13:00:00	1900-08-01 12:00:00	wswww	88	2011-10-17 17:30:00	2018-01-24 07:15:00	2007-07-22 03:30:00	2021-10-28 07:45:00	2019-10-19 08:15:00	1900-09-08	wwsww	109
12005	2001-07-03 21:15:00	2018-06-02 16:15:00	2007-06-08 00:30:00	2020-08-12 06:45:00	2021-08-06 10:30:00	1900-08-08	sssss	66	1999-09-20 23:15:00	2004-08-18 09:00:00	2007-06-08 00:30:00	2018-06-02 16:15:00	2001-07-03 21:15:00	1900-08-06	sssss	80
16007	2001-09-30 23:45:00	2009-07-28 23:30:00	1994-10-23 04:45:00	2015-07-17 05:15:00	2008-08-09 22:00:00	1900-09-13 12:00:00	sswss	93	2002-09-10 00:15:00	2020-08-12 03:45:00	2008-08-09 22:00:00	2001-09-30 23:45:00	2016-01-26 11:15:00	1900-08-11 12:00:00	ssssw	112
84029	2003-05-30 14:30:00	1992-08-30 14:30:00	1993-09-10 19:30:00	2002-07-30 16:15:00	2015-02-28 18:15:00	1900-08-06	ssssw	94	2002-07-30 16:30:00	2003-05-30 14:45:00	2000-09-20 04:30:00	2011-10-17 15:00:00	2016-01-10 18:15:00	1900-09-17	sssww	124
80004	2010-01-16 03:30:00	2003-01-12 19:00:00	2020-08-12 18:15:00	2012-08-04 14:45:00	2002-09-07 14:15:00	1900-08-24	wwsss	89	2002-09-07 14:45:00	2010-01-16 03:30:00	2003-01-12 19:00:00	1998-09-01 09:45:00	1988-09-04 23:00:00	1900-09-01	swwss	74
4005	2007-07-03 14:15:00	2019-07-30 21:30:00	2004-08-16 18:15:00	1988-07-07 15:45:00	1992-01-06 08:15:00	1900-07-30	ssssw	87	2004-12-21 21:15:00	2004-02-02 17:15:00	2003-03-09 11:00:00	2019-07-30 21:30:00	2007-07-03 14:15:00	1900-07-30	wwwss	128
18021	2019-02-01 03:45:00	2018-09-16 10:30:00	2005-01-19 11:15:00	2007-03-11 22:15:00	2002-07-30 13:45:00	1900-07-14	wswws	116	2002-07-30 13:45:00	1993-01-09 04:15:00	2012-11-19 06:45:00	2005-06-19 06:15:00	2009-09-08 07:15:00	1900-09-04 12:00:00	swwss	110
84001	1960-07-12 13:30:00	1985-10-01 05:45:00	1956-08-13 09:15:00	1966-09-04 06:30:00	2000-09-11 13:30:00	1900-09-04 12:00:00	swsss	105	1985-10-01 05:45:00	1960-07-12 13:30:00	1956-08-13 09:15:00	1994-02-01 11:15:00	1983-10-18 10:15:00	1900-08-12 12:00:00	wssww	112
9003	1996-01-01 09:00:00	2021-07-11 18:45:00	1991-11-04 04:45:00	2002-07-30 23:30:00	2004-08-18 16:15:00	1900-08-15	wswss	96	2009-11-01 22:30:00	2021-07-11 19:00:00	2017-10-22 08:30:00	2014-08-11 00:45:00	2005-11-25 11:15:00	1900-08-26 12:00:00	wswsw	95
20003	2020-08-11 22:15:00	2008-04-27 20:30:00	2000-08-28 10:15:00	2005-10-30 14:30:00	1998-04-06 21:45:00	1900-09-03	swsww	84	2020-08-11 22:15:00	2008-04-27 20:30:00	1993-10-06 06:30:00	2012-09-26 10:30:00	2000-08-28 10:15:00	1900-09-03	swwss	113
15014	2006-08-19 15:45:00	2009-06-13 22:00:00	2014-08-09 00:30:00	2017-06-21 21:45:00	2015-08-10 16:00:00	1900-08-13	sssss	71	2005-06-19 05:45:00	2015-08-10 16:15:00	2016-07-20 10:30:00	2012-08-15 22:00:00	2019-07-24 07:00:00	1900-09-03 12:00:00	sssss	73
21015	2009-06-14 22:30:00	2002-10-20 19:00:00	1990-09-24 16:45:00	2021-10-05 15:15:00	1992-08-30 11:45:00	1900-08-29	swsws	56	2002-10-20 19:00:00	1990-10-06 20:15:00	1990-09-24 16:45:00	2009-06-14 22:30:00	1992-08-30 11:45:00	1900-09-14	wwsss	75
17001	2016-04-01 19:15:00	2002-07-30 18:00:00	2004-08-06 03:30:00	2005-09-23 08:45:00	2007-06-20 10:15:00	1900-08-02	wssss	98	2013-04-17 15:15:00	2011-02-03 20:45:00	2011-10-17 15:45:00	2006-12-13 19:45:00	1998-10-21 02:45:00	1900-08-10	wwwww	114
12006	2006-02-03 13:15:00	2001-10-14 21:00:00	2000-08-08 16:15:00	1991-06-30 18:15:00	1993-01-01 12:15:00	1900-07-24	wwssw	120	2001-10-14 21:00:00	2021-02-24 15:15:00	1993-01-15 09:00:00	1990-10-28 21:30:00	2015-07-17 09:00:00	1900-07-11	wwwws	123
92002	2003-07-18 13:45:00	2007-06-21 15:45:00	2009-07-17 18:45:00	2012-07-22 17:15:00	2004-08-26 18:30:00	1900-08-14	sssss	66	2007-06-21 15:45:00	2005-11-14 16:45:00	2003-07-18 13:45:00	2017-08-23 05:00:00	1987-08-20 13:45:00	1900-09-10	swsss	79
7005	1985-07-27 17:15:00	1999-06-28 16:45:00	1986-03-04 15:15:00	1983-05-07 19:00:00	1989-09-23 06:15:00	1900-08-11 12:00:00	sswss	84	2004-08-19 03:00:00	1985-12-01 08:00:00	2014-08-11 04:45:00	1984-09-23 18:30:00	1985-07-27 17:15:00	1900-09-03	swsss	84
84035	2011-08-26 14:45:00	1997-07-13 15:45:00	2016-07-20 08:15:00	2019-08-03 18:15:00	2000-09-01 15:15:00	1900-07-27	sssss	50	2001-07-03 23:45:00	1997-07-13 15:45:00	1991-07-08 12:30:00	1994-11-14 15:30:00	2006-08-01 17:30:00	1900-08-03	sssws	105
18022	2006-09-28 20:30:00	2008-01-07 16:45:00	2018-11-15 17:45:00	2002-12-04 10:30:00	2006-12-13 20:15:00	1900-10-29	swwww	106	2006-12-13 20:15:00	2002-02-07 11:15:00	2008-10-25 16:15:00	2010-04-07 00:45:00	2002-12-04 10:30:00	1900-10-23	wwwww	132
80005	2001-02-10 15:30:00	2012-08-29 04:45:00	2010-10-02 12:45:00	2014-08-06 18:15:00	1994-09-06 07:15:00	1900-08-26 12:00:00	wswss	67	2005-11-07 20:15:00	1994-09-06 07:15:00	2010-10-02 12:45:00	2001-02-10 15:30:00	2012-08-04 15:00:00	1900-08-18	wswws	75
4006	2010-01-16 06:30:00	1990-12-11 06:00:00	2010-12-29 22:45:00	2001-01-24 14:15:00	1996-01-04 08:30:00	1900-09-11	wwwww	120	2010-01-16 06:30:00	2013-12-14 15:45:00	2013-01-02 19:00:00	2014-10-21 06:00:00	2010-12-29 22:45:00	1900-05-05	wwwww	134
92003	2005-11-20 13:45:00	2003-05-07 18:30:00	2004-08-10 12:45:00	2002-02-21 15:00:00	2000-09-11 09:15:00	1900-07-29	wssws	78	2005-11-11 22:15:00	2001-12-03 16:30:00	2005-01-11 14:00:00	2004-09-12 21:15:00	2000-12-02 02:45:00	1900-08-28	wwwsw	99
20007	2011-07-09 06:30:00	2000-11-06 17:00:00	2013-05-20 20:15:00	2000-08-28 08:30:00	2016-07-20 21:15:00	1900-08-29	swsss	90	2000-11-06 17:00:00	2008-08-07 01:00:00	2010-01-16 09:00:00	2020-12-04 19:00:00	2011-07-09 06:30:00	1900-08-31	wswws	96
15015	2002-10-22 01:00:00	2006-09-01 08:00:00	2018-06-02 19:30:00	2016-07-20 10:45:00	2014-10-06 08:00:00	1900-09-01 12:00:00	wsssw	81	2001-12-03 23:15:00	2006-09-01 08:15:00	2006-11-19 21:00:00	2005-06-19 06:00:00	1999-09-20 18:00:00	1900-09-15 12:00:00	wswss	95
17003	2001-07-04 01:00:00	2018-06-02 17:15:00	2011-07-06 06:15:00	1999-05-12 19:45:00	2021-07-03 18:00:00	1900-07-19	sssss	43	2001-07-04 01:00:00	1999-05-12 19:45:00	2002-08-07 03:00:00	2018-06-02 17:15:00	2005-06-30 18:30:00	1900-07-19	sssss	53
7008	2008-08-03 21:45:00	2006-08-01 16:30:00	2009-07-06 23:15:00	2007-08-18 18:30:00	2004-12-14 20:15:00	1900-08-07	ssssw	76	2006-08-01 16:30:00	2008-08-03 21:45:00	2009-07-06 23:15:00	2007-08-18 18:30:00	1997-08-13 20:00:00	1900-08-10	sssss	79
9004	2002-07-30 22:15:00	2010-09-23 04:30:00	2016-07-20 20:00:00	2000-04-23 15:15:00	1993-09-11 14:30:00	1900-08-14	sssws	81	2002-07-30 22:15:00	2016-07-20 20:00:00	1998-04-04 09:00:00	2002-11-15 12:45:00	2007-11-22 12:00:00	1900-09-07	sswww	88
92004	2021-10-26 22:00:00	2008-07-31 04:45:00	2009-07-26 09:45:00	2010-07-01 10:30:00	2011-05-07 20:30:00	1900-07-26	wssss	88	2014-02-06 15:45:00	2021-08-08 18:45:00	2010-12-27 15:30:00	2012-01-18 02:30:00	2019-08-31 09:15:00	1900-08-31	wswws	98
12007	2019-07-24 09:00:00	1999-09-08 19:30:00	1984-09-23 14:30:00	1991-09-21 17:00:00	1990-09-06 19:00:00	1900-09-01	sssss	99	2019-07-24 09:00:00	2015-07-17 07:30:00	1999-09-08 19:30:00	1988-10-07 13:45:00	2020-06-17 02:30:00	1900-09-10	sssws	112
84037	2010-01-16 07:30:00	1989-09-24 15:15:00	2021-05-13 17:00:00	2001-07-04 02:30:00	1994-10-23 02:45:00	1900-07-11	wsssw	115	2010-01-16 07:30:00	2001-07-04 02:30:00	2013-12-30 08:00:00	2002-02-22 06:00:00	2015-01-15 03:45:00	1900-07-14 12:00:00	wswww	128
19001	2002-07-30 16:15:00	2000-08-02 18:15:00	2021-07-04 18:30:00	1997-08-13 23:30:00	2010-06-05 22:00:00	1900-07-30	sssss	91	2002-07-30 17:00:00	2008-08-10 01:45:00	1994-03-14 07:30:00	1997-08-13 23:30:00	2018-06-20 02:45:00	1900-08-11	sswss	110
4007	2002-08-06 22:00:00	2020-01-11 03:30:00	2018-10-23 07:00:00	2005-12-15 21:00:00	2017-08-25 18:15:00	1900-09-15	swwws	111	2020-01-11 03:45:00	2010-12-10 12:30:00	2018-01-28 22:45:00	2005-12-15 21:00:00	2017-08-25 18:30:00	1900-07-28	wwwws	132
80006	1996-02-16 13:30:00	1998-10-17 09:45:00	2013-12-30 02:00:00	2015-12-30 02:00:00	2012-11-19 05:45:00	1900-08-14	wwwww	130	1996-02-16 13:30:00	2015-12-30 05:45:00	2009-04-27 05:30:00	1998-10-17 09:45:00	1999-12-03 03:45:00	1900-10-03	wwwww	127
7009	2019-08-07 02:15:00	2004-10-17 13:30:00	1999-06-28 18:30:00	2008-08-21 14:15:00	1999-11-28 19:45:00	1900-08-20 12:00:00	swssw	73	2004-10-17 13:30:00	2014-08-11 05:30:00	2002-11-16 13:00:00	2009-09-04 06:00:00	2020-12-08 04:15:00	1900-08-10 12:00:00	wswsw	97
21016	1986-06-17 14:15:00	2000-08-28 10:30:00	1987-08-17 17:30:00	2019-07-11 17:00:00	1988-04-18 20:45:00	1900-08-03	ssssw	100	1987-08-17 17:30:00	2000-08-28 10:30:00	1984-11-03 13:15:00	1986-06-17 14:15:00	2021-12-04 22:00:00	1900-08-18	sswsw	111
84003	1999-07-21 13:00:00	1972-01-24 11:00:00	1975-12-02 16:15:00	1968-10-03 10:00:00	1973-02-20 17:15:00	1900-08-16	swwww	110	1999-07-21 13:00:00	2008-02-05 15:15:00	2009-05-04 08:15:00	1972-01-24 11:00:00	2006-01-22 22:30:00	1900-09-11	swsww	115
17004	2011-02-07 12:00:00	2010-07-21 05:00:00	2008-08-10 01:00:00	2012-01-04 23:30:00	2012-10-17 13:45:00	1900-07-16	wssww	86	2011-02-07 12:30:00	1999-12-03 10:30:00	2006-03-21 12:30:00	2012-01-04 23:30:00	1999-09-29 06:15:00	1900-07-20	wwwws	113
84040	2010-12-29 18:30:00	2015-06-01 20:15:00	2007-10-28 05:15:00	2017-11-07 07:30:00	2020-08-25 14:00:00	1900-08-25	wswws	86	2015-12-30 09:45:00	2015-06-01 20:15:00	2006-11-19 21:15:00	2010-12-29 18:30:00	2009-11-19 17:45:00	1900-09-07 12:00:00	wswww	140
15016	2011-12-08 14:15:00	1993-01-15 19:00:00	1998-11-10 03:15:00	2015-11-11 17:30:00	1994-01-27 11:45:00	1900-07-21	wwwww	136	1993-01-15 19:00:00	2018-09-19 10:45:00	2008-01-08 20:45:00	2011-12-08 14:15:00	2015-12-30 08:45:00	1900-04-15	wswww	146
9005	2009-07-06 19:00:00	2010-04-01 09:15:00	2015-07-17 10:00:00	2013-11-02 19:30:00	2004-08-18 13:15:00	1900-08-07	swsws	89	2009-07-06 19:00:00	2004-08-18 13:15:00	2021-08-10 19:45:00	1995-09-07 23:00:00	2001-08-19 22:45:00	1900-09-07	sssss	78
7010	2011-07-16 20:45:00	2021-07-27 19:15:00	2009-07-14 22:45:00	2020-06-06 04:30:00	2014-08-17 20:15:00	1900-07-21 12:00:00	sssss	72	2011-07-16 20:45:00	2005-06-13 07:00:00	2021-07-27 19:15:00	2014-08-11 05:45:00	2014-10-08 04:15:00	1900-07-15	ssssw	84
4008	2015-08-10 19:30:00	2011-06-13 11:00:00	2006-10-24 05:15:00	1998-05-14 18:30:00	2000-08-27 23:45:00	1900-08-10	sswss	90	2006-10-24 05:15:00	2011-12-08 15:00:00	2015-01-15 13:00:00	1997-05-19 04:00:00	2017-11-21 21:15:00	1900-08-20	wwwsw	124
12008	2000-07-30 16:45:00	2015-07-17 08:15:00	2003-04-22 05:00:00	1988-10-19 08:30:00	2011-10-25 12:15:00	1900-08-25 12:00:00	sswww	66	1987-07-11 17:30:00	2015-12-30 11:45:00	2015-07-07 18:15:00	1988-10-19 08:30:00	2012-08-16	1900-10-02 12:00:00	swsws	65
93001	2013-09-15 07:30:00	2012-01-18 01:30:00	2011-09-06 08:15:00	2014-10-19 09:00:00	2019-07-24 07:45:00	1900-09-13	swsws	107	1983-12-31 09:30:00	2007-01-15 01:00:00	1990-09-18 19:15:00	1990-12-11 09:00:00	2008-10-20 02:00:00	1900-09-14 12:00:00	wwsww	127
7011	2020-12-31 08:15:00	2016-01-10 05:15:00	2013-06-23 19:30:00	2012-08-25 06:30:00	2014-08-11 02:15:00	1900-08-11	wwsss	109	2014-08-11 08:15:00	2017-06-07 01:30:00	2020-12-08 02:30:00	2016-01-10 05:15:00	2014-10-07 20:00:00	1900-08-26	sswww	109
7012	2015-09-01 21:15:00	2019-04-03 11:00:00	2017-06-07 00:15:00	2020-12-08 02:15:00	2021-11-01 06:30:00	1900-08-18	swsww	99	2017-06-07 03:00:00	2020-12-08 03:45:00	2019-04-03 11:00:00	2015-09-01 22:45:00	2016-08-03 15:45:00	1900-10-11 12:00:00	swwss	88
17005	2019-08-04 17:15:00	1997-08-13 19:00:00	2008-08-01 10:00:00	1993-07-16 17:00:00	2020-08-12 05:00:00	1900-08-01	sssss	66	2020-08-12 05:00:00	1997-08-13 19:00:00	2000-10-29 05:30:00	1999-12-03 07:15:00	2008-08-01 10:00:00	1900-08-10	sswws	106
21003	1959-07-27 14:15:00	2004-08-09 04:00:00	1970-09-08 14:15:00	1972-05-26 03:15:00	1961-01-27 13:15:00	1900-08-18 12:00:00	ssssw	86	1979-01-07 12:30:00	1965-11-01 00:30:00	1962-08-03 19:00:00	1959-07-27 14:15:00	1982-12-19 14:45:00	1900-09-27	wwssw	96
21017	2017-05-27 16:15:00	2008-08-01 06:00:00	2018-06-02 15:15:00	2007-07-18 15:00:00	2002-05-13 18:45:00	1900-08-06	sssss	75	2017-05-27 16:15:00	2008-08-01 06:00:00	2005-10-11 20:00:00	2007-07-18 15:00:00	2009-07-29 00:30:00	1900-09-11	sswss	96
9006	2021-05-10 17:45:00	2010-09-23 05:00:00	2002-07-19 10:15:00	2020-07-27 20:00:00	2014-08-10 23:15:00	1900-08-19 12:00:00	sssss	87	2010-09-23 09:00:00	1995-09-12 09:00:00	2014-08-10 23:45:00	2009-09-04 00:30:00	2014-10-08 03:30:00	1900-09-08	ssssw	82
4009	1997-07-01 08:00:00	2000-08-18 21:30:00	1995-11-26 23:30:00	2010-12-10 13:45:00	1998-06-25 13:30:00	1900-07-11	sswws	56	2013-12-28 09:00:00	2014-10-28 05:15:00	2000-08-18 21:30:00	2004-08-18 17:45:00	2002-02-21 20:00:00	1900-08-19	wwssw	108
84004	1995-03-25 09:00:00	2017-11-07 15:30:00	2010-01-16 04:00:00	1982-12-19 09:15:00	1979-01-15 23:15:00	1900-10-03	wwwww	107	1995-03-25 09:00:00	2013-12-30 20:00:00	1981-09-20 08:30:00	1982-02-09 00:30:00	1979-11-25 18:00:00	1900-09-20	wwsww	136
93002	2007-06-21 18:00:00	2006-09-24 20:45:00	2004-08-18 16:45:00	2013-09-15 07:45:00	2016-06-24 19:45:00	1900-07-20	sssss	68	2005-09-13 10:45:00	2018-10-23 05:15:00	2016-02-01 02:45:00	2004-08-18 16:45:00	2013-09-15 07:45:00	1900-09-07	swwss	95
15021	2013-12-31 10:45:00	2000-09-20 14:00:00	2011-01-15 13:30:00	2014-11-07 11:45:00	2018-12-18 21:00:00	1900-09-04	wswww	118	2016-01-07 19:30:00	2013-12-31 10:45:00	2004-08-12 02:00:00	1999-02-05 11:00:00	2012-12-23 03:45:00	1900-04-23	wwsww	141
85001	1990-07-17 05:45:00	1981-09-18 08:00:00	1978-10-03 13:15:00	1978-04-17 17:30:00	1980-05-30 14:45:00	1900-08-01	sswws	74	1992-03-18 16:00:00	1990-07-17 05:45:00	1982-07-01	2009-07-21 12:15:00	2004-03-19 04:15:00	1900-08-07	wsssw	81
12009	1991-06-23 16:15:00	2004-08-18 07:15:00	2015-07-07 16:00:00	2012-08-27 15:15:00	2011-07-10 11:30:00	1900-09-11	sssss	58	2000-07-30 15:00:00	2015-07-07 16:45:00	2006-10-19 15:30:00	1991-06-23 16:15:00	1995-09-07 20:15:00	1900-10-04	sswss	62
4010	2016-02-01 05:00:00	2019-07-30 20:30:00	2020-01-07 14:30:00	2016-12-23 12:15:00	2014-12-09 12:45:00	1900-10-24 12:00:00	wswww	134	2020-01-07 14:30:00	2016-01-29 05:45:00	2013-12-05 05:30:00	2019-07-30 20:45:00	2015-01-09 23:45:00	1900-08-06 12:00:00	wwwsw	146
81002	1993-06-26 21:15:00	1979-09-01 23:15:00	1983-10-04 01:00:00	2011-08-10 08:15:00	1980-07-27 04:15:00	1900-08-01	sswss	58	1993-06-26 21:15:00	1982-10-01 20:45:00	1980-07-27 04:15:00	1978-08-02 21:30:00	1966-09-02 06:30:00	1900-08-27 12:00:00	swsss	77
9010	2009-07-06 21:30:00	2012-10-12 15:30:00	2015-07-17 14:15:00	2021-05-19 00:45:00	2013-10-09 23:30:00	1900-07-19	swssw	71	2009-07-06 21:45:00	2012-10-12 15:30:00	2015-12-30 12:15:00	2009-11-02 00:45:00	2021-08-07 07:30:00	1900-08-07	swwws	69
17008	2020-08-12 01:30:00	2008-04-28 10:30:00	1998-03-29 22:00:00	2015-07-17 06:45:00	1997-02-27 16:45:00	1900-07-29	swwsw	96	2006-12-13 17:00:00	2015-12-05 08:15:00	1998-11-22 03:00:00	2008-01-25 03:15:00	1998-02-11 09:00:00	1900-09-10	wwwww	123
4011	2016-06-07 14:30:00	2012-07-22 16:30:00	2019-07-30 19:30:00	2015-06-25 17:15:00	2013-09-15 07:30:00	1900-08-12 12:00:00	sssss	83	2016-06-07 14:30:00	2019-07-30 19:30:00	2012-07-22 16:30:00	2016-10-18 00:45:00	2011-09-25 17:45:00	1900-07-26 12:00:00	sssws	92
8002	2021-10-31 17:15:00	1987-09-24 21:45:00	1988-08-12 20:45:00	1989-09-20 08:00:00	1989-12-24 15:45:00	1900-09-27 12:00:00	wsssw	56	2019-12-23 03:45:00	2012-08-05 23:45:00	2019-07-24 10:00:00	1999-09-08 21:15:00	2015-07-17 09:45:00	1900-10-03	wssss	57
21005	2004-08-09 02:45:00	2018-09-19 14:00:00	1996-10-24 23:30:00	2015-06-01 21:45:00	1998-08-17 04:30:00	1900-08-14	sswss	77	2004-08-09 02:45:00	2000-09-11 11:45:00	1987-10-18 14:45:00	2021-02-20 23:00:00	2018-09-19 14:00:00	1900-08-17	sswss	106
21018	2021-11-10 12:30:00	2003-05-30 16:30:00	1998-07-31 21:30:00	1999-11-05 10:30:00	2001-08-20 12:30:00	1900-08-09	wssws	89	2021-11-10 12:30:00	2003-05-30 16:30:00	2001-08-20 12:30:00	1998-07-31 21:30:00	1999-11-05 11:00:00	1900-08-10	wsssw	112
10002	2014-01-19 18:00:00	1998-11-26 15:15:00	1995-09-12 05:30:00	2016-01-08 07:00:00	2009-11-02 05:15:00	1900-08-11	wwsww	118	2016-01-08 07:00:00	1991-10-20 09:00:00	2010-12-11 06:15:00	1996-09-26 09:00:00	2009-11-02 05:15:00	1900-09-19 12:00:00	wwwsw	123
81003	1999-11-05 02:30:00	1995-07-11 20:00:00	2011-07-07 06:15:00	2003-11-02 01:15:00	2021-05-03 15:15:00	1900-08-30	wssws	83	1998-10-24 10:15:00	1994-10-23 01:45:00	1988-08-18 02:15:00	2021-05-03 15:15:00	1999-11-05 02:30:00	1900-10-22	wwssw	94
85002	1982-09-10 11:15:00	1985-10-01 03:15:00	1986-12-05 01:45:00	1988-10-19 04:30:00	1981-09-23 16:45:00	1900-08-22	swwws	109	1982-09-10 11:15:00	1986-12-05 01:45:00	1993-05-18 09:30:00	1981-05-01	1985-10-01 03:15:00	1900-08-23	swssw	125
94001	2009-10-03 10:45:00	2021-11-27 02:30:00	1986-11-05 06:15:00	1972-04-14 13:15:00	1972-12-11 19:15:00	1900-10-25	wwwww	107	2011-12-26 15:15:00	2015-01-12 10:30:00	2016-01-29 07:30:00	2006-12-04 05:00:00	2008-11-14 16:45:00	1900-04-15	wwwww	145
13001	1987-07-11 17:00:00	1991-06-23 20:00:00	2005-05-03 16:00:00	2019-08-09 16:45:00	2021-05-12 09:15:00	1900-09-15 12:00:00	sssss	106	2012-12-23 04:00:00	2010-11-19 10:15:00	1979-10-04 15:30:00	2009-11-01 23:30:00	2020-10-04 03:30:00	1900-09-05 12:00:00	wwwww	110
5003	1989-04-13 01:45:00	1990-02-14 13:45:00	1990-11-12 17:30:00	1991-10-28 17:30:00	1993-04-23 04:45:00	1900-06-18	wwwww	103	1990-02-14 13:45:00	1993-04-23 04:45:00	2009-02-13 09:45:00	2009-12-06 17:00:00	2018-08-27 17:15:00	1900-04-27 12:00:00	wwwws	112
94003	2016-08-03 15:15:00	2011-12-19 15:15:00	2013-07-29 19:00:00	2021-11-04 15:15:00	2011-07-13 12:00:00	1900-08-26 12:00:00	swsws	101	2013-07-29 19:00:00	2016-08-03 15:15:00	2011-12-19 15:15:00	2014-08-11 12:45:00	2020-09-13 12:00:00	1900-08-28	sswss	99
21019	2000-07-29 19:15:00	2006-08-18 16:30:00	2007-10-28 06:45:00	1992-08-13	2001-09-30 23:45:00	1900-08-15	sswss	68	2005-10-11 22:15:00	2000-09-11 10:00:00	2015-12-30 09:15:00	2011-12-08 11:00:00	2018-01-24 06:00:00	1900-07-20	wswww	123
84005	1987-08-20 21:30:00	1985-09-21 04:00:00	2009-05-06 23:45:00	1973-12-11 11:45:00	1995-10-22 11:15:00	1900-09-10	sssww	101	1985-09-21 04:00:00	1973-12-11 11:45:00	1982-12-19 07:45:00	1987-08-20 21:30:00	1991-12-22 08:15:00	1900-09-11 12:00:00	swwsw	112
81004	1991-11-01 06:00:00	1988-01-19 05:00:00	1989-08-11 10:15:00	1990-07-19 14:30:00	1990-10-02 18:45:00	1900-10-11	wwssw	104	1991-11-01 06:00:00	1994-12-08 07:15:00	2001-01-05 10:30:00	2016-11-12 14:15:00	2012-11-19 19:00:00	1900-10-25	wwwww	119
10003	2020-10-22 02:45:00	2017-08-18 18:00:00	1999-12-25 00:30:00	1985-08-30 09:45:00	1987-10-21 08:15:00	1900-10-21	wswsw	96	2016-01-08 00:30:00	1996-02-10 09:00:00	2020-10-22 06:15:00	2009-11-01 20:15:00	2008-04-08 15:45:00	1900-10-07 12:00:00	wwwww	110
5004	2021-07-05 20:00:00	2008-12-03 22:00:00	2017-08-26 01:45:00	2013-04-14 04:15:00	2005-09-26 14:45:00	1900-08-19 12:00:00	swsws	82	2008-10-25 10:15:00	1997-03-01 09:00:00	2015-11-08 16:00:00	1995-09-23 19:30:00	2021-07-05 20:00:00	1900-09-03	wwwss	111
13002	2019-07-10 18:15:00	1993-07-17 14:30:00	1987-10-18 13:00:00	1987-07-11 19:00:00	2017-07-26 17:15:00	1900-08-28	sswss	94	1985-12-01 05:15:00	2019-07-10 18:15:00	1988-04-18 23:30:00	1984-11-10 03:30:00	1988-10-26 04:30:00	1900-08-04 12:00:00	wswww	103
8004	2011-07-09 19:15:00	2004-08-04 08:00:00	1980-06-06 19:15:00	1989-01-13 21:30:00	1993-10-01 10:30:00	1900-09-12 12:00:00	sssww	91	1980-06-06 19:15:00	1990-10-28 19:45:00	2015-07-17 10:30:00	2000-10-28 22:45:00	1989-01-13 21:30:00	1900-09-19 12:00:00	swsww	87
85003	2008-07-30 01:30:00	2005-08-31 19:00:00	2015-08-10 14:30:00	2000-09-06 05:00:00	1991-07-01 14:00:00	1900-08-19	sssss	76	2012-06-28 17:15:00	2006-09-29 16:00:00	2019-08-04 18:15:00	2005-08-31 19:00:00	2000-09-06 05:00:00	1900-09-10	sssss	89
21020	2008-05-10 15:30:00	1998-07-31 17:45:00	2007-07-03 19:15:00	2012-08-29 11:30:00	2016-12-23 13:00:00	1900-07-13	ssssw	66	2008-05-10 15:45:00	1997-02-19 16:30:00	2002-03-10 12:00:00	1986-10-04 19:15:00	2015-12-30 07:45:00	1900-08-10	swwww	108
95001	2008-10-29 12:30:00	1981-09-20 17:30:00	2011-10-18 13:30:00	1991-10-18 12:30:00	2015-12-09 14:15:00	1900-10-18	wswww	85	2008-10-29 12:30:00	2002-05-28 15:15:00	1981-09-20 17:45:00	2011-10-18 13:15:00	2004-01-19 12:30:00	1900-10-04	wssww	106
81006	1991-08-09 05:30:00	1988-10-18 14:00:00	1991-10-16 06:00:00	2003-09-22 03:45:00	2005-09-19 17:45:00	1900-09-12	swwss	74	1993-05-17 15:15:00	2000-10-25 06:45:00	1991-10-16 06:00:00	1988-10-18 14:00:00	2020-06-17 20:00:00	1900-09-22	swwws	78
84006	1976-05-22 03:00:00	1981-09-18 03:00:00	2020-08-04 13:00:00	2021-09-30 08:15:00	2009-09-08 07:15:00	1900-06-01 12:00:00	sssss	67	1981-09-18 03:00:00	1976-05-22 03:15:00	1982-09-27 15:30:00	1999-04-20 09:00:00	2020-08-04 14:15:00	1900-06-26 12:00:00	sssws	78
11001	2003-12-24 20:00:00	2007-06-24 07:15:00	2001-10-21 02:15:00	2012-10-12 19:15:00	2016-01-08 00:30:00	1900-08-09	wswww	75	2016-01-08 04:00:00	2012-09-25 19:45:00	2009-10-22 18:15:00	2003-12-24 20:00:00	2002-10-23 07:00:00	1900-08-12	wswww	94
8005	2019-12-10 16:45:00	2011-08-10 16:30:00	2004-10-21 13:45:00	2005-10-30 20:45:00	2016-12-23 19:30:00	1900-10-22	wswww	102	2003-11-29 17:45:00	2019-12-10 16:45:00	2019-07-24 14:15:00	1990-02-05 10:15:00	2001-10-31 04:15:00	1900-09-18	wwsww	124
13004	2021-09-10 18:00:00	1998-06-26 20:15:00	2000-06-22 18:30:00	2010-09-07 16:00:00	2007-10-28 05:45:00	1900-08-23	ssssw	57	2015-07-17 06:30:00	2021-09-10 18:00:00	2005-06-04 14:00:00	2005-10-30 15:00:00	2004-08-19 12:15:00	1900-09-09	sssws	77
85004	2013-07-03 09:00:00	2010-09-11 06:15:00	2011-07-07 17:30:00	1994-08-24 16:15:00	1986-03-08 16:15:00	1900-08-01	ssssw	77	2000-06-08 10:45:00	1998-02-11 09:00:00	1994-08-24 16:15:00	1986-01-10 03:00:00	2000-10-17 23:45:00	1900-09-10	swsww	83
95002	2011-07-10 15:15:00	2003-04-01 01:00:00	2012-02-04 15:15:00	2014-08-03 19:00:00	2007-07-05 20:00:00	1900-08-25	swwss	110	2015-08-10 16:30:00	2015-12-30 04:45:00	2003-04-01 01:00:00	1990-01-14 21:15:00	1992-01-06 09:00:00	1900-09-14	swwww	121
81007	2015-07-17 03:00:00	1998-09-01 09:45:00	1992-09-12 22:00:00	2006-09-29 14:00:00	1994-07-10 00:15:00	1900-08-29	sssss	73	1992-09-12 22:00:00	2015-07-17 03:00:00	1998-08-03 10:30:00	2002-10-24 19:15:00	2004-03-19 07:30:00	1900-08-21	sssww	87
21021	2005-04-18 17:30:00	1989-01-18 08:15:00	1985-07-26 19:45:00	1997-12-18 23:00:00	1982-12-19 14:00:00	1900-08-25 12:00:00	wwsww	108	2005-04-18 17:30:00	1982-12-19 14:00:00	1989-01-18 08:15:00	1985-07-26 19:45:00	1997-12-11 11:00:00	1900-08-25 12:00:00	wwwsw	124
13005	2002-10-22 08:45:00	1998-10-16 14:15:00	2019-08-09 16:30:00	1994-01-03 20:45:00	2012-11-22 14:15:00	1900-09-18 12:00:00	wwsww	110	2002-10-22 08:45:00	2020-10-22 04:30:00	2001-02-28 16:00:00	2004-10-21 11:00:00	2019-08-09 17:00:00	1900-06-13	wwwws	126
95003	2015-08-10 16:30:00	2014-08-06 14:30:00	2011-07-10 06:30:00	2019-09-27 14:00:00	2021-07-10 17:15:00	1900-08-08 12:00:00	sssss	50	2014-08-06 14:30:00	2018-10-23 02:15:00	2015-08-10 16:30:00	2017-10-07 07:30:00	2011-07-10 06:30:00	1900-08-08	swsws	84
84008	2011-08-26 16:00:00	2004-08-08 22:00:00	2020-06-10 16:15:00	1994-07-31 19:15:00	2016-07-20 09:45:00	1900-07-31	sssss	89	2008-09-02 21:15:00	2004-12-14 12:30:00	2012-08-04 19:45:00	2006-05-04 22:00:00	1994-02-01 07:15:00	1900-09-20	swssw	114
88001	2010-09-11 06:00:00	2018-12-18 10:30:00	2000-09-11 07:45:00	1996-02-05 07:45:00	2010-10-01 11:00:00	1900-10-11	swsww	108	2018-12-18 10:30:00	1997-11-17 23:30:00	2012-11-19 02:15:00	1998-10-24 11:00:00	2019-10-06 01:15:00	1900-10-26	wwwww	98
95004	2017-08-25 14:30:00	2015-08-10 17:15:00	2014-08-06 14:30:00	2019-07-24 09:15:00	2010-08-23 21:15:00	1900-08-10	sssss	68	2017-08-25 14:30:00	2015-08-10 17:30:00	2019-07-24 09:15:00	2016-02-01 04:15:00	2021-10-26 11:45:00	1900-08-23	ssssw	96
21023	2007-12-22 14:15:00	1990-10-06 20:45:00	1994-12-08 14:30:00	2010-12-10 20:00:00	1993-12-29 18:00:00	1900-07-30	wwwww	124	2010-12-10 20:00:00	2000-11-07 02:45:00	2016-01-27 15:45:00	2007-12-22 14:15:00	1993-01-24 05:00:00	1900-05-02	wwwww	135
13007	1992-08-22 23:45:00	1997-11-18 08:45:00	2021-08-06 12:00:00	2010-09-07 18:30:00	2012-08-27 16:15:00	1900-09-07	swsss	95	2015-07-17 09:15:00	1997-11-18 08:45:00	2018-11-10 04:45:00	2010-10-01 17:00:00	2000-09-20 03:30:00	1900-09-20	swwws	98
95005	2006-10-26 23:15:00	2009-02-16 18:00:00	2013-12-05 02:15:00	2005-11-14 18:15:00	2019-05-26 17:00:00	1900-10-09	wwwws	129	2006-10-26 23:15:00	2009-02-16 18:00:00	2005-11-14 18:15:00	2021-11-20 09:45:00	2014-08-11 09:00:00	1900-09-15	wwwws	130
82001	1996-04-03 09:30:00	1980-07-26 03:30:00	1988-08-30 09:00:00	1980-11-14 09:00:00	2000-09-11 09:30:00	1900-08-20	wssws	112	1996-04-03 09:30:00	1985-09-21 04:30:00	2000-09-11 09:30:00	1980-11-14 09:00:00	1980-07-26 03:30:00	1900-08-31	wssws	118
8006	2006-09-15 03:15:00	1982-08-07 03:15:00	1978-08-05 00:45:00	1980-06-06 22:15:00	1992-08-30 18:00:00	1900-08-31 12:00:00	sssss	83	1982-08-07 03:15:00	1980-06-06 22:15:00	1982-10-04 23:30:00	1975-11-16 09:45:00	1958-07-28 23:15:00	1900-09-07	sswws	83
84009	2001-07-04 00:15:00	1978-06-22 20:15:00	2007-07-18 18:00:00	2018-06-01 16:00:00	1999-07-10 19:15:00	1900-08-05	sssss	87	2001-07-04 00:15:00	2007-07-18 18:00:00	1982-09-27 14:15:00	1982-12-19 04:15:00	2000-09-11 09:45:00	1900-08-20	sssws	104
89002	2001-07-06 17:30:00	2004-05-10 17:15:00	1999-05-21 07:00:00	1995-03-23 09:00:00	1996-07-03 10:15:00	1900-07-04	sssws	93	2001-07-06 17:30:00	1995-03-23 09:00:00	1996-07-03 10:15:00	2004-05-10 17:15:00	2015-08-10 14:15:00	1900-09-11	swsss	101
95006	2014-08-11 10:30:00	2014-10-08 01:45:00	2013-09-16 21:30:00	2019-01-13 01:45:00	2016-01-29 04:45:00	1900-08-11	swsww	129	2019-01-13 03:45:00	2010-12-10 20:00:00	2014-10-08 01:45:00	2008-01-27 03:15:00	2014-08-11 10:45:00	1900-03-15	wwwws	133
21024	2000-07-09 20:15:00	2020-07-27 19:30:00	2015-07-17 11:45:00	2019-07-31 14:00:00	2011-09-06 09:00:00	1900-08-13	sssss	59	2016-06-07 15:45:00	2012-08-05 08:00:00	2011-09-06 09:00:00	2014-08-08 21:00:00	2016-12-23 15:00:00	1900-08-08	ssssw	59
13008	2020-08-12 10:30:00	2015-07-17 10:00:00	2017-09-28 07:30:00	2011-10-25 13:45:00	2009-04-08 09:15:00	1900-09-16	sssww	68	2015-07-17 10:00:00	2020-08-12 10:30:00	2012-08-27 16:45:00	1988-10-19 10:00:00	2017-09-28 07:30:00	1900-09-21	sssws	87
82002	1994-08-01 20:45:00	2000-09-11 08:45:00	1999-05-12 16:45:00	1981-09-17 23:45:00	1985-12-31 17:15:00	1900-09-17	ssssw	85	2000-09-11 08:45:00	1994-08-01 20:45:00	1981-09-20 00:45:00	1982-12-19 02:45:00	1985-12-31 17:15:00	1900-09-12	sssww	96
84011	2008-07-31 04:00:00	1994-07-31 21:00:00	2014-05-20	1988-10-19 04:15:00	1981-09-17 03:45:00	1900-08-05	sssws	90	1981-01-01	1999-11-26 12:15:00	1983-02-04 18:30:00	1980-09-07 09:45:00	1986-08-14 02:45:00	1900-08-09	wwwss	106
21025	2003-05-30 22:00:00	1993-10-03 01:45:00	2004-08-04 09:30:00	2013-04-14 13:15:00	2015-05-03 17:45:00	1900-08-05	swsws	89	2003-05-30 22:00:00	2012-08-05 08:30:00	2007-06-22 17:45:00	2013-04-14 13:15:00	1993-10-03 01:45:00	1900-07-21	sssww	103
96001	1980-08-01 18:45:00	1988-07-07 13:00:00	1982-05-22 19:15:00	1985-12-31 13:30:00	1987-01-19 10:00:00	1900-08-01	sssww	86	1987-01-19 10:00:00	2010-01-13 14:45:00	1988-07-07 13:15:00	1980-07-26 04:00:00	1985-12-31 13:30:00	1900-08-24	wwssw	100
13009	1992-08-22 21:45:00	2009-07-06 14:00:00	1994-10-20 10:15:00	2021-08-06 09:45:00	1990-06-06 22:15:00	1900-08-30	sswss	62	2015-07-17 07:30:00	1985-08-14 21:00:00	2009-07-06 14:00:00	2012-08-27 14:30:00	1992-08-22 21:45:00	1900-09-10	sssss	78
82003	1980-07-26 04:30:00	1999-06-19 20:15:00	1991-08-09 08:15:00	2007-09-16 12:00:00	2015-06-28 11:30:00	1900-08-14	sssss	65	1979-12-19 13:30:00	2001-11-21 16:00:00	1983-10-12 09:30:00	2012-06-23 09:30:00	1982-10-17 13:30:00	1900-08-14	wwwsw	98
21026	1992-08-03 02:45:00	2018-08-12 22:15:00	1988-07-10 03:15:00	1997-07-03 17:30:00	2010-12-10 17:15:00	1900-08-14	ssssw	99	2005-10-30 12:45:00	2008-08-06 22:45:00	2015-11-08 15:45:00	1992-08-03 02:45:00	2004-08-09 15:15:00	1900-08-17	wswss	127
84012	1994-12-28 14:00:00	1985-09-30 23:45:00	1990-02-06 09:45:00	1981-09-20 04:30:00	1989-03-19 13:30:00	1900-09-20	wswsw	116	1994-12-28 14:00:00	1981-09-20 04:30:00	1981-10-01 09:00:00	1985-09-30 23:45:00	1979-12-26 23:45:00	1900-08-05	wswsw	135
13010	2007-03-07 05:30:00	2020-08-12 06:30:00	2011-08-06 23:30:00	2019-08-09 15:45:00	2005-01-08 08:00:00	1900-08-15 12:00:00	wsssw	84	2019-08-09 16:15:00	2005-01-08 08:00:00	2011-08-06 23:45:00	2007-03-07 05:30:00	2020-10-22 04:30:00	1900-08-16 12:00:00	swsww	125
21027	2013-05-21 02:30:00	2002-11-02 23:45:00	2002-07-31 02:30:00	1990-10-06 17:45:00	2014-06-13 17:00:00	1900-07-17	swsws	82	2002-11-02 23:45:00	2002-07-31 02:30:00	1987-06-06 06:00:00	2012-06-16 20:00:00	1998-11-03 03:00:00	1900-08-03 12:00:00	wsssw	108
13012	1999-12-22 12:15:00	2015-12-30 08:15:00	2002-11-03 01:45:00	1997-11-18 14:15:00	2018-11-28 23:00:00	1900-08-31 12:00:00	wwwww	73	2015-12-30 13:15:00	2018-11-28 23:00:00	2015-07-17 15:00:00	2002-11-03 01:45:00	1997-11-18 14:15:00	1900-09-08	wwsww	124
83003	2001-07-04 01:45:00	1971-09-01 15:45:00	1993-06-09 18:45:00	2004-08-09 03:45:00	1999-05-12 16:45:00	1900-07-22	sssss	101	2001-07-04 01:45:00	1994-10-23 05:15:00	2010-01-15 22:30:00	1990-05-16 17:30:00	1971-09-01 15:45:00	1900-08-04	swwss	99
84013	1995-03-25 09:00:00	1981-01-18 00:30:00	1982-12-19 07:30:00	1987-12-26 14:15:00	1985-10-01 04:45:00	1900-09-13	wwwww	105	1981-01-18 00:30:00	1992-11-02 10:00:00	1995-03-25 09:00:00	1989-09-04 11:45:00	1985-10-01 04:45:00	1900-10-11	wwwsw	108
13017	2011-07-06 10:30:00	2019-08-09 14:30:00	2007-01-11 02:45:00	2005-01-08 07:00:00	2020-08-12 05:45:00	1900-09-02	sswws	94	2011-07-06 10:30:00	2020-10-03 19:00:00	2009-09-03 19:45:00	2009-11-01 16:15:00	2007-01-11 02:45:00	1900-08-09	swsww	123
83004	2008-01-26 15:30:00	2011-08-26 17:30:00	2001-07-04 01:30:00	1983-03-05 19:45:00	1988-07-22 02:30:00	1900-08-24	wssws	87	1985-09-21 02:30:00	1982-09-27 17:30:00	1980-07-26 22:30:00	2001-07-04 01:45:00	1982-11-05 22:45:00	1900-10-08	ssssw	89
84014	1993-07-08 18:15:00	1979-03-25 09:00:00	1997-04-24 02:00:00	1984-10-04 02:30:00	1989-09-22 09:00:00	1900-08-05	swwws	86	1994-03-03 06:00:00	2002-08-07 01:45:00	1984-01-13 03:30:00	1980-11-20 16:15:00	1979-03-08 09:00:00	1900-09-04	wswww	105
84016	2002-07-30 16:15:00	2005-06-09 08:30:00	2001-07-04	1997-09-16 11:15:00	1988-08-18 15:30:00	1900-08-01	sssss	91	2002-07-30 16:15:00	1988-08-18 15:30:00	1997-09-16 11:15:00	2012-06-22 13:45:00	2005-06-09 08:30:00	1900-08-14	sssss	105
84017	2008-01-13 09:00:00	1979-12-27 12:45:00	2006-09-20 09:45:00	2005-04-06 14:45:00	2015-10-24 05:45:00	1900-08-07	wwsww	91	2008-01-13 09:00:00	1979-12-27 12:45:00	1991-06-14 09:45:00	1987-08-16 05:00:00	1982-12-14 10:00:00	1900-09-08	wwssw	107
	Number of stations where summer maximum H coincides with summer Max Q (Rank 1)					43
	Number of stations where summer maximum H coincides with summer Max Q (Rank 2)					30
	Number of stations where summer maximum H coincides with summer Max Q (Rank 3)					11
	Number of stations where summer maximum H coincides with summer Max Q (Rank 4)					16
	Number of stations where summer maximum H coincides with summer Max Q (Rank 5)					10	110
	Number of stations where summer Max H does not coincide with Rank 1 to 5 Max Q					70
	Number of stations with Max h in summmer					180

## Sheet: area
	Level								Discharge
1001	2010-12-28 06:45:00	2012-10-20 04:30:00	1999-04-21 04:00:00	2020-02-29 08:00:00	1996-01-01 18:15:00	1900-07-09	wwwws	95	2006-10-12 01:45:00	1997-07-01 09:30:00	2010-08-05 23:30:00	2012-10-20 04:30:00	2016-06-24 15:45:00	1900-10-07	wssws
2001	1980-07-26 04:45:00	1978-02-23 02:45:00	1981-12-13 16:30:00	2001-02-11 14:30:00	1988-10-26 04:15:00	1900-08-31	swwww	118	1980-07-26 05:00:00	1978-02-23 02:45:00	2001-02-11 14:30:00	1988-01-20 11:45:00	1980-11-24 17:15:00	1900-10-04	swwww
2002	2013-02-05 15:15:00	2014-08-11 08:30:00	2006-10-02 05:30:00	2014-10-07 18:00:00	2002-02-22 00:45:00	1900-09-24 12:00:00	wswww	105	2013-02-05 15:15:00	2014-08-11 10:00:00	2005-11-26 02:15:00	2006-10-26 07:15:00	2002-01-28 14:15:00	1900-08-31 12:00:00	wswww
3002	2004-09-12 06:15:00	2017-11-07 00:30:00	2016-08-08 02:45:00	2011-09-06 12:00:00	1975-07-15 01:00:00	1900-09-06	swsss	86	2018-10-23 04:45:00	2017-11-07 00:30:00	2014-10-07 14:00:00	2016-08-08 02:45:00	2005-12-15 19:45:00	1900-09-26	wwwsw
3003	2014-08-29 15:30:00	2015-08-10 17:30:00	2012-08-21 20:30:00	2013-07-29 19:30:00	2001-01-24 14:15:00	1900-08-10	ssssw	92	2015-08-10 17:45:00	1978-10-05 11:30:00	1990-03-10 13:15:00	2013-07-29 19:30:00	2014-08-29 15:30:00	1900-09-11	swwss
3004	2006-07-11 09:15:00	2013-04-16 20:45:00	2011-07-16 15:15:00	2019-07-31 10:45:00	2001-05-29 03:00:00	1900-08-02	swsss	90	2014-08-06 18:00:00	2019-07-31 10:45:00	2006-07-11 09:15:00	2001-05-29 03:00:00	2010-12-30 11:45:00	1900-08-02	ssssw
3006	2014-08-11 06:15:00	2013-09-03 10:00:00	2008-03-21 14:30:00	2021-11-18 04:45:00	2016-12-23 20:15:00	1900-08-22 12:00:00	sswww	122	2014-08-11 06:15:00	2013-09-03 10:00:00	2018-10-23 03:00:00	2012-01-12 01:00:00	2021-11-18 04:45:00	1900-09-15	sswww
4001	1979-02-26 15:30:00	2010-11-03 12:45:00	1982-10-01 09:00:00	1987-01-13 17:00:00	2016-01-29 09:30:00	1900-06-18	wwwww	130	1979-02-26 15:30:00	1980-12-14 18:30:00	1981-10-28 17:30:00	1979-10-22 07:45:00	1982-10-01 09:00:00	1900-05-04	wwwww
4003	1975-07-15	1977-08-25 08:15:00	1974-07-12 21:30:00	2019-07-10 14:30:00	1980-06-06 19:45:00	1900-08-06	sssss	64	1975-07-15	2019-07-10 14:30:00	1977-08-25 08:15:00	2012-08-06 23:15:00	2006-10-26 08:15:00	1900-08-17 12:00:00	ssssw
4005	2007-07-03 14:15:00	2019-07-30 21:30:00	2004-08-16 18:15:00	1988-07-07 15:45:00	1992-01-06 08:15:00	1900-07-30	ssssw	87	2004-12-21 21:15:00	2004-02-02 17:15:00	2003-03-09 11:00:00	2019-07-30 21:30:00	2007-07-03 14:15:00	1900-07-30	wwwss
4006	2010-01-16 06:30:00	1990-12-11 06:00:00	2010-12-29 22:45:00	2001-01-24 14:15:00	1996-01-04 08:30:00	1900-09-11	wwwww	120	2010-01-16 06:30:00	2013-12-14 15:45:00	2013-01-02 19:00:00	2014-10-21 06:00:00	2010-12-29 22:45:00	1900-05-05	wwwww
4007	2002-08-06 22:00:00	2020-01-11 03:30:00	2018-10-23 07:00:00	2005-12-15 21:00:00	2017-08-25 18:15:00	1900-09-15	swwws	111	2020-01-11 03:45:00	2010-12-10 12:30:00	2018-01-28 22:45:00	2005-12-15 21:00:00	2017-08-25 18:30:00	1900-07-28	wwwws
4008	2015-08-10 19:30:00	2011-06-13 11:00:00	2006-10-24 05:15:00	1998-05-14 18:30:00	2000-08-27 23:45:00	1900-08-10	sswss	90	2006-10-24 05:15:00	2011-12-08 15:00:00	2015-01-15 13:00:00	1997-05-19 04:00:00	2017-11-21 21:15:00	1900-08-20	wwwsw
4009	1997-07-01 08:00:00	2000-08-18 21:30:00	1995-11-26 23:30:00	2010-12-10 13:45:00	1998-06-25 13:30:00	1900-07-11	sswws	56	2013-12-28 09:00:00	2014-10-28 05:15:00	2000-08-18 21:30:00	2004-08-18 17:45:00	2002-02-21 20:00:00	1900-08-19	wwssw
4010	2016-02-01 05:00:00	2019-07-30 20:30:00	2020-01-07 14:30:00	2016-12-23 12:15:00	2014-12-09 12:45:00	1900-10-24 12:00:00	wswww	134	2020-01-07 14:30:00	2016-01-29 05:45:00	2013-12-05 05:30:00	2019-07-30 20:45:00	2015-01-09 23:45:00	1900-08-06 12:00:00	wwwsw
4011	2016-06-07 14:30:00	2012-07-22 16:30:00	2019-07-30 19:30:00	2015-06-25 17:15:00	2013-09-15 07:30:00	1900-08-12 12:00:00	sssss	83	2016-06-07 14:30:00	2019-07-30 19:30:00	2012-07-22 16:30:00	2016-10-18 00:45:00	2011-09-25 17:45:00	1900-07-26 12:00:00	sssws
5003	1989-04-13 01:45:00	1990-02-14 13:45:00	1990-11-12 17:30:00	1991-10-28 17:30:00	1993-04-23 04:45:00	1900-06-18	wwwww	103	1990-02-14 13:45:00	1993-04-23 04:45:00	2009-02-13 09:45:00	2009-12-06 17:00:00	2018-08-27 17:15:00	1900-04-27 12:00:00	wwwws
5004	2021-07-05 20:00:00	2008-12-03 22:00:00	2017-08-26 01:45:00	2013-04-14 04:15:00	2005-09-26 14:45:00	1900-08-19 12:00:00	swsws	82	2008-10-25 10:15:00	1997-03-01 09:00:00	2015-11-08 16:00:00	1995-09-23 19:30:00	2021-07-05 20:00:00	1900-09-03	wwwss
6007	2013-02-04 13:45:00	1977-11-08 19:45:00	2020-10-24 07:30:00	2002-03-10 22:00:00	2020-02-09 15:15:00	1900-10-06	wwwww	130	2016-05-05 12:30:00	1976-01-27 07:00:00	1995-10-25 01:30:00	1977-11-08 19:45:00	1972-12-04 21:45:00	1900-08-31	swwww
6008	1981-11-20 06:45:00	1992-01-06 11:15:00	2015-12-04 19:15:00	1990-12-28 12:00:00	1999-01-15 11:45:00	1900-08-19	wwwww	126	1980-07-27 09:00:00	2015-03-07 05:30:00	2006-12-01 01:15:00	1990-02-05 02:15:00	1994-03-05 01:00:00	1900-10-01	swwww
6011	2018-06-02 18:30:00	2012-06-28 18:30:00	2004-05-09 19:30:00	2006-09-01 08:00:00	2016-08-07 17:30:00	1900-08-10 12:00:00	sssss	84	2012-06-28 18:45:00	2016-08-07 17:30:00	2000-08-02 18:30:00	2018-06-02 18:30:00	2004-08-17 20:00:00	1900-08-05 12:00:00	sssss
6012	2009-07-06 18:45:00	2016-07-20 05:00:00	2011-06-07 20:45:00	2012-02-04 15:30:00	2021-02-15 04:30:00	1900-07-08 12:00:00	sssww	90	2016-07-20 05:00:00	2009-02-15 03:45:00	2011-01-13 09:15:00	2010-01-16 12:00:00	2014-02-26 14:45:00	1900-05-09 12:00:00	swwww
6013	2013-06-22 13:45:00	2020-06-26 15:30:00	2019-08-07 01:15:00	2021-07-04 15:30:00	2004-06-20 14:00:00	1900-07-21	sssss	64	2002-09-08 03:00:00	2019-08-07 01:15:00	1998-11-14 15:30:00	2009-07-02 15:30:00	2016-05-21 12:00:00	1900-07-13	sswss
7001	1994-08-04 02:15:00	2019-08-01 02:15:00	1986-08-14 07:15:00	2016-07-20 07:45:00	2005-08-31 22:30:00	1900-09-17	sssss	86	2014-08-11 07:45:00	2014-11-14 18:15:00	2005-08-31 22:30:00	1980-07-26 04:30:00	2019-08-01 02:15:00	1900-09-09 12:00:00	swsss
7002	1990-06-07 03:30:00	1980-07-26 09:00:00	2011-07-07 03:15:00	2005-09-01 03:15:00	2006-07-03 10:00:00	1900-09-21	sssss	89	1990-06-07 03:30:00	2014-08-17 21:30:00	1980-07-26 09:00:00	2016-01-26 16:30:00	1958-09-07 02:00:00	1900-09-18	sssws
7003	2004-08-19 11:30:00	2009-07-24 14:45:00	2015-09-02 01:15:00	2002-07-30 18:45:00	2014-08-11 03:30:00	1900-08-26	sssss	68	2004-08-19 11:30:00	2014-08-11 07:00:00	2004-10-17 16:45:00	2009-11-01 23:15:00	1997-07-01 10:30:00	1900-09-02	sswws
7004	2006-08-01 21:45:00	2000-08-28 03:45:00	2011-07-16 16:45:00	1990-06-07 01:30:00	1981-09-20 08:15:00	1900-08-12	sssss	78	2006-08-01 21:45:00	1981-09-20 13:15:00	1981-10-03 03:30:00	1990-06-07 01:30:00	1990-10-28 19:30:00	1900-08-12 12:00:00	sswsw
7005	1985-07-27 17:15:00	1999-06-28 16:45:00	1986-03-04 15:15:00	1983-05-07 19:00:00	1989-09-23 06:15:00	1900-08-11 12:00:00	sswss	84	2004-08-19 03:00:00	1985-12-01 08:00:00	2014-08-11 04:45:00	1984-09-23 18:30:00	1985-07-27 17:15:00	1900-09-03	swsss
7008	2008-08-03 21:45:00	2006-08-01 16:30:00	2009-07-06 23:15:00	2007-08-18 18:30:00	2004-12-14 20:15:00	1900-08-07	ssssw	76	2006-08-01 16:30:00	2008-08-03 21:45:00	2009-07-06 23:15:00	2007-08-18 18:30:00	1997-08-13 20:00:00	1900-08-10	sssss
7009	2019-08-07 02:15:00	2004-10-17 13:30:00	1999-06-28 18:30:00	2008-08-21 14:15:00	1999-11-28 19:45:00	1900-08-20 12:00:00	swssw	73	2004-10-17 13:30:00	2014-08-11 05:30:00	2002-11-16 13:00:00	2009-09-04 06:00:00	2020-12-08 04:15:00	1900-08-10 12:00:00	wswsw
7010	2011-07-16 20:45:00	2021-07-27 19:15:00	2009-07-14 22:45:00	2020-06-06 04:30:00	2014-08-17 20:15:00	1900-07-21 12:00:00	sssss	72	2011-07-16 20:45:00	2005-06-13 07:00:00	2021-07-27 19:15:00	2014-08-11 05:45:00	2014-10-08 04:15:00	1900-07-15	ssssw
7011	2020-12-31 08:15:00	2016-01-10 05:15:00	2013-06-23 19:30:00	2012-08-25 06:30:00	2014-08-11 02:15:00	1900-08-11	wwsss	109	2014-08-11 08:15:00	2017-06-07 01:30:00	2020-12-08 02:30:00	2016-01-10 05:15:00	2014-10-07 20:00:00	1900-08-26	sswww
7012	2015-09-01 21:15:00	2019-04-03 11:00:00	2017-06-07 00:15:00	2020-12-08 02:15:00	2021-11-01 06:30:00	1900-08-18	swsww	99	2017-06-07 03:00:00	2020-12-08 03:45:00	2019-04-03 11:00:00	2015-09-01 22:45:00	2016-08-03 15:45:00	1900-10-11 12:00:00	swwss
8002	2021-10-31 17:15:00	1987-09-24 21:45:00	1988-08-12 20:45:00	1989-09-20 08:00:00	1989-12-24 15:45:00	1900-09-27 12:00:00	wsssw	56	2019-12-23 03:45:00	2012-08-05 23:45:00	2019-07-24 10:00:00	1999-09-08 21:15:00	2015-07-17 09:45:00	1900-10-03	wssss
8004	2011-07-09 19:15:00	2004-08-04 08:00:00	1980-06-06 19:15:00	1989-01-13 21:30:00	1993-10-01 10:30:00	1900-09-12 12:00:00	sssww	91	1980-06-06 19:15:00	1990-10-28 19:45:00	2015-07-17 10:30:00	2000-10-28 22:45:00	1989-01-13 21:30:00	1900-09-19 12:00:00	swsww
8005	2019-12-10 16:45:00	2011-08-10 16:30:00	2004-10-21 13:45:00	2005-10-30 20:45:00	2016-12-23 19:30:00	1900-10-22	wswww	102	2003-11-29 17:45:00	2019-12-10 16:45:00	2019-07-24 14:15:00	1990-02-05 10:15:00	2001-10-31 04:15:00	1900-09-18	wwsww
8006	2006-09-15 03:15:00	1982-08-07 03:15:00	1978-08-05 00:45:00	1980-06-06 22:15:00	1992-08-30 18:00:00	1900-08-31 12:00:00	sssss	83	1982-08-07 03:15:00	1980-06-06 22:15:00	1982-10-04 23:30:00	1975-11-16 09:45:00	1958-07-28 23:15:00	1900-09-07	sswws
8007	2000-08-02 20:00:00	2001-01-22 20:30:00	2004-10-19 16:30:00	1991-09-21 17:00:00	2001-10-01 01:45:00	1900-09-21	swwsw	106	2021-11-09 13:15:00	1998-10-16 15:45:00	2009-07-02 19:30:00	2001-10-01 01:45:00	2011-10-29 18:15:00	1900-08-21 12:00:00	wwsww
8008	2005-01-01 14:15:00	2009-08-20 10:00:00	2018-09-18 00:30:00	2007-06-22 17:15:00	2015-06-01 21:15:00	1900-09-07 12:00:00	wssss	97	1993-01-17 09:00:00	2002-07-30 18:45:00	2009-08-20 10:00:00	2005-11-07 23:00:00	2005-01-01 14:15:00	1900-08-24	wssww
8009	1981-09-18 10:15:00	2016-06-07 19:00:00	1990-06-07 01:30:00	2005-09-01 00:15:00	1998-08-10 22:00:00	1900-08-30	sssss	103	1981-09-20 10:30:00	1958-08-11 02:45:00	1985-12-01 07:15:00	1990-06-07 01:30:00	1963-03-05 22:15:00	1900-08-10 12:00:00	sswsw
8010	1989-01-13 22:00:00	1992-10-01 08:00:00	2012-10-12 16:15:00	2002-11-15 12:30:00	1988-08-13 01:00:00	1900-09-03	wwwws	76	1990-06-07 03:30:00	1989-01-13 22:00:00	1993-01-16 21:15:00	2015-12-05 05:45:00	2007-06-21 18:45:00	1900-09-01	swwws
8011	2016-06-24 16:45:00	2001-06-27 19:30:00	2002-08-06 13:45:00	2005-06-03 20:45:00	1999-07-10 15:45:00	1900-08-08	sssss	46	2002-08-06 13:45:00	2004-08-19 02:00:00	2014-08-11 06:00:00	2001-06-27 19:30:00	1999-07-10 15:45:00	1900-08-11 12:00:00	sssss
8013	2015-07-17 08:30:00	2005-08-24 07:15:00	2015-10-24 09:00:00	2020-07-27 17:45:00	2012-08-05 22:30:00	1900-08-26	sswss	51	2015-12-30 12:15:00	2016-12-23 19:30:00	2019-07-24 08:45:00	2015-07-17 08:30:00	2002-07-30 20:30:00	1900-08-29 12:00:00	wwsss
9001	2009-07-06 23:00:00	1977-08-26 14:30:00	2013-10-10 01:30:00	1992-08-30 17:00:00	2007-06-24 00:30:00	1900-08-26	sswss	78	1962-01-05 20:15:00	1970-08-16 14:00:00	2009-07-06 23:00:00	1972-05-27 16:15:00	1977-08-26 14:30:00	1900-08-26	wssss
9002	2009-07-07 04:00:00	1984-09-24 00:30:00	1977-08-26 19:15:00	1967-10-04 13:45:00	1972-05-27 23:30:00	1900-08-21	sssws	72	2009-11-01 21:45:00	1960-08-25 21:45:00	1972-05-27 23:30:00	1970-08-16 18:30:00	1960-11-04 07:30:00	1900-08-26	wsssw
9003	1996-01-01 09:00:00	2021-07-11 18:45:00	1991-11-04 04:45:00	2002-07-30 23:30:00	2004-08-18 16:15:00	1900-08-15	wswss	96	2009-11-01 22:30:00	2021-07-11 19:00:00	2017-10-22 08:30:00	2014-08-11 00:45:00	2005-11-25 11:15:00	1900-08-26 12:00:00	wswsw
9004	2002-07-30 22:15:00	2010-09-23 04:30:00	2016-07-20 20:00:00	2000-04-23 15:15:00	1993-09-11 14:30:00	1900-08-14	sssws	81	2002-07-30 22:15:00	2016-07-20 20:00:00	1998-04-04 09:00:00	2002-11-15 12:45:00	2007-11-22 12:00:00	1900-09-07	sswww
9005	2009-07-06 19:00:00	2010-04-01 09:15:00	2015-07-17 10:00:00	2013-11-02 19:30:00	2004-08-18 13:15:00	1900-08-07	swsws	89	2009-07-06 19:00:00	2004-08-18 13:15:00	2021-08-10 19:45:00	1995-09-07 23:00:00	2001-08-19 22:45:00	1900-09-07	sssss
9006	2021-05-10 17:45:00	2010-09-23 05:00:00	2002-07-19 10:15:00	2020-07-27 20:00:00	2014-08-10 23:15:00	1900-08-19 12:00:00	sssss	87	2010-09-23 09:00:00	1995-09-12 09:00:00	2014-08-10 23:45:00	2009-09-04 00:30:00	2014-10-08 03:30:00	1900-09-08	ssssw
9010	2009-07-06 21:30:00	2012-10-12 15:30:00	2015-07-17 14:15:00	2021-05-19 00:45:00	2013-10-09 23:30:00	1900-07-19	swssw	71	2009-07-06 21:45:00	2012-10-12 15:30:00	2015-12-30 12:15:00	2009-11-02 00:45:00	2021-08-07 07:30:00	1900-08-07	swwws
10002	2014-01-19 18:00:00	1998-11-26 15:15:00	1995-09-12 05:30:00	2016-01-08 07:00:00	2009-11-02 05:15:00	1900-08-11	wwsww	118	2016-01-08 07:00:00	1991-10-20 09:00:00	2010-12-11 06:15:00	1996-09-26 09:00:00	2009-11-02 05:15:00	1900-09-19 12:00:00	wwwsw
10003	2020-10-22 02:45:00	2017-08-18 18:00:00	1999-12-25 00:30:00	1985-08-30 09:45:00	1987-10-21 08:15:00	1900-10-21	wswsw	96	2016-01-08 00:30:00	1996-02-10 09:00:00	2020-10-22 06:15:00	2009-11-01 20:15:00	2008-04-08 15:45:00	1900-10-07 12:00:00	wwwww
11001	2003-12-24 20:00:00	2007-06-24 07:15:00	2001-10-21 02:15:00	2012-10-12 19:15:00	2016-01-08 00:30:00	1900-08-09	wswww	75	2016-01-08 04:00:00	2012-09-25 19:45:00	2009-10-22 18:15:00	2003-12-24 20:00:00	2002-10-23 07:00:00	1900-08-12	wswww
11002	1973-12-03 09:45:00	1982-08-07 10:45:00	1999-07-11 00:30:00	1986-03-04 22:00:00	1979-01-15 00:15:00	1900-08-06 12:00:00	wssww	97	1973-12-03 09:45:00	1981-12-31 01:30:00	1979-01-15 00:15:00	1999-07-11 00:30:00	1984-09-24 01:30:00	1900-08-19 12:00:00	wwwwss
11003	1982-08-07 06:15:00	1999-07-10 19:15:00	1995-12-30 19:15:00	1985-01-27 18:15:00	1984-09-23 21:45:00	1900-08-06 12:00:00	sswws	80	1995-12-30 19:15:00	1982-08-07 06:15:00	1999-07-10 19:15:00	2004-08-19 03:30:00	1985-01-27 18:15:00	1900-09-04	wsssw
11004	1990-11-18 03:00:00	2002-09-07 17:30:00	2013-11-03 06:45:00	2020-10-22 06:30:00	2010-11-19 06:15:00	1900-09-09	wswww	90	1995-09-08 09:00:00	2009-11-02 00:15:00	2016-01-08 00:30:00	1990-11-18 03:00:00	2015-07-07 16:45:00	1900-09-04	swwws
11006	2007-06-21 19:00:00	2011-06-21 04:45:00	2004-01-01 09:00:00	1999-07-10 14:45:00	2019-07-10 19:45:00	1900-07-22 12:00:00	sswss	84	2009-11-02 01:15:00	2021-02-21 00:30:00	1999-07-10 14:45:00	2007-06-22 19:00:00	2001-08-19 21:30:00	1900-08-04	wwsss
12001	2007-10-28 12:30:00	1989-09-20 17:45:00	2019-07-24 20:00:00	1993-10-01 13:00:00	1990-01-10 18:45:00	1900-09-18	wssww	88	2015-12-30 14:30:00	1981-10-03 01:30:00	1989-09-20 17:45:00	2002-07-31 03:45:00	1990-01-10 18:45:00	1900-09-24	swwssw
12002	1982-08-07 04:00:00	1993-10-01 15:30:00	1990-01-10 20:15:00	1989-09-20 19:30:00	2000-01-31 04:00:00	1900-09-10 12:00:00	swwsw	99	1982-09-25 02:30:00	1993-10-01 15:30:00	2002-07-31 05:30:00	2014-10-06 17:45:00	1992-02-27 20:45:00	1900-09-22 12:00:00	swsww
12003	1991-09-21 23:00:00	1990-09-07 00:15:00	1999-09-09 01:00:00	2020-07-27 21:15:00	2019-07-24 13:45:00	1900-08-25 12:00:00	sssss	90	1982-08-06 20:15:00	2021-02-20 20:00:00	2018-12-18 12:45:00	1990-09-07 00:15:00	2014-10-06 12:15:00	1900-09-08	swwsw
12004	2000-07-29 16:00:00	2020-08-12 06:00:00	2004-08-04 04:30:00	1996-07-23 16:30:00	1999-05-12 14:00:00	1900-08-04	sssss	101	1995-09-09 22:15:00	1993-01-15 05:15:00	1998-06-07 14:00:00	1996-01-08 23:15:00	2002-07-31 00:30:00	1900-07-17	swsws
12005	2001-07-03 21:15:00	2018-06-02 16:15:00	2007-06-08 00:30:00	2020-08-12 06:45:00	2021-08-06 10:30:00	1900-08-08	sssss	66	1999-09-20 23:15:00	2004-08-18 09:00:00	2007-06-08 00:30:00	2018-06-02 16:15:00	2001-07-03 21:15:00	1900-08-06	sssss
12006	2006-02-03 13:15:00	2001-10-14 21:00:00	2000-08-08 16:15:00	1991-06-30 18:15:00	1993-01-01 12:15:00	1900-07-24	wwssw	120	2001-10-14 21:00:00	2021-02-24 15:15:00	1993-01-15 09:00:00	1990-10-28 21:30:00	2015-07-17 09:00:00	1900-07-11	wwwws
12007	2019-07-24 09:00:00	1999-09-08 19:30:00	1984-09-23 14:30:00	1991-09-21 17:00:00	1990-09-06 19:00:00	1900-09-01	sssss	99	2019-07-24 09:00:00	2015-07-17 07:30:00	1999-09-08 19:30:00	1988-10-07 13:45:00	2020-06-17 02:30:00	1900-09-10	sssws
12008	2000-07-30 16:45:00	2015-07-17 08:15:00	2003-04-22 05:00:00	1988-10-19 08:30:00	2011-10-25 12:15:00	1900-08-25 12:00:00	sswww	66	1987-07-11 17:30:00	2015-12-30 11:45:00	2015-07-07 18:15:00	1988-10-19 08:30:00	2012-08-16	1900-10-02 12:00:00	swsws
12009	1991-06-23 16:15:00	2004-08-18 07:15:00	2015-07-07 16:00:00	2012-08-27 15:15:00	2011-07-10 11:30:00	1900-09-11	sssss	58	2000-07-30 15:00:00	2015-07-07 16:45:00	2006-10-19 15:30:00	1991-06-23 16:15:00	1995-09-07 20:15:00	1900-10-04	sswss
13001	1987-07-11 17:00:00	1991-06-23 20:00:00	2005-05-03 16:00:00	2019-08-09 16:45:00	2021-05-12 09:15:00	1900-09-15 12:00:00	sssss	106	2012-12-23 04:00:00	2010-11-19 10:15:00	1979-10-04 15:30:00	2009-11-01 23:30:00	2020-10-04 03:30:00	1900-09-05 12:00:00	wwwww
13002	2019-07-10 18:15:00	1993-07-17 14:30:00	1987-10-18 13:00:00	1987-07-11 19:00:00	2017-07-26 17:15:00	1900-08-28	sswss	94	1985-12-01 05:15:00	2019-07-10 18:15:00	1988-04-18 23:30:00	1984-11-10 03:30:00	1988-10-26 04:30:00	1900-08-04 12:00:00	wswww
13004	2021-09-10 18:00:00	1998-06-26 20:15:00	2000-06-22 18:30:00	2010-09-07 16:00:00	2007-10-28 05:45:00	1900-08-23	ssssw	57	2015-07-17 06:30:00	2021-09-10 18:00:00	2005-06-04 14:00:00	2005-10-30 15:00:00	2004-08-19 12:15:00	1900-09-09	sssws
13005	2002-10-22 08:45:00	1998-10-16 14:15:00	2019-08-09 16:30:00	1994-01-03 20:45:00	2012-11-22 14:15:00	1900-09-18 12:00:00	wwsww	110	2002-10-22 08:45:00	2020-10-22 04:30:00	2001-02-28 16:00:00	2004-10-21 11:00:00	2019-08-09 17:00:00	1900-06-13	wwwws
13007	1992-08-22 23:45:00	1997-11-18 08:45:00	2021-08-06 12:00:00	2010-09-07 18:30:00	2012-08-27 16:15:00	1900-09-07	swsss	95	2015-07-17 09:15:00	1997-11-18 08:45:00	2018-11-10 04:45:00	2010-10-01 17:00:00	2000-09-20 03:30:00	1900-09-20	swwws
13008	2020-08-12 10:30:00	2015-07-17 10:00:00	2017-09-28 07:30:00	2011-10-25 13:45:00	2009-04-08 09:15:00	1900-09-16	sssww	68	2015-07-17 10:00:00	2020-08-12 10:30:00	2012-08-27 16:45:00	1988-10-19 10:00:00	2017-09-28 07:30:00	1900-09-21	sssws
13009	1992-08-22 21:45:00	2009-07-06 14:00:00	1994-10-20 10:15:00	2021-08-06 09:45:00	1990-06-06 22:15:00	1900-08-30	sswss	62	2015-07-17 07:30:00	1985-08-14 21:00:00	2009-07-06 14:00:00	2012-08-27 14:30:00	1992-08-22 21:45:00	1900-09-10	sssss
13010	2007-03-07 05:30:00	2020-08-12 06:30:00	2011-08-06 23:30:00	2019-08-09 15:45:00	2005-01-08 08:00:00	1900-08-15 12:00:00	wsssw	84	2019-08-09 16:15:00	2005-01-08 08:00:00	2011-08-06 23:45:00	2007-03-07 05:30:00	2020-10-22 04:30:00	1900-08-16 12:00:00	swsww
13012	1999-12-22 12:15:00	2015-12-30 08:15:00	2002-11-03 01:45:00	1997-11-18 14:15:00	2018-11-28 23:00:00	1900-08-31 12:00:00	wwwww	73	2015-12-30 13:15:00	2018-11-28 23:00:00	2015-07-17 15:00:00	2002-11-03 01:45:00	1997-11-18 14:15:00	1900-09-08	wwsww
13017	2011-07-06 10:30:00	2019-08-09 14:30:00	2007-01-11 02:45:00	2005-01-08 07:00:00	2020-08-12 05:45:00	1900-09-02	sswws	94	2011-07-06 10:30:00	2020-10-03 19:00:00	2009-09-03 19:45:00	2009-11-01 16:15:00	2007-01-11 02:45:00	1900-08-09	swsww
14001	2002-07-31 01:30:00	2008-08-10 02:30:00	2000-10-09 18:00:00	1999-12-24 21:45:00	1995-11-15 10:30:00	1900-07-17 12:00:00	sswww	93	2009-07-06 11:30:00	2008-08-10 02:30:00	2002-07-31 01:30:00	2013-05-20 16:30:00	2009-11-01 15:30:00	1900-07-12 12:00:00	ssssw
14002	2021-07-28 00:15:00	1991-11-18 20:30:00	2002-07-30 23:15:00	2004-08-16 17:00:00	2008-08-13	1900-08-15 12:00:00	swsss	77	2021-07-28 00:15:00	2004-08-16 17:00:00	2019-08-10 22:45:00	2009-09-04 08:30:00	2002-07-30 23:15:00	1900-08-17	sssss
14005	1993-10-07 12:30:00	1998-04-03 11:45:00	1992-03-31 16:15:00	2009-11-01 17:45:00	2002-12-01 11:15:00	1900-10-11 12:00:00	wwwww	122	1993-10-07 12:30:00	1993-01-15 17:00:00	1992-04-01 04:15:00	2008-08-13 19:00:00	2012-12-21 04:15:00	1900-10-06	wwwsw
14009	2009-07-06 10:30:00	2016-08-03 07:00:00	2005-06-04 16:00:00	2005-10-24 13:00:00	2001-10-08 00:30:00	1900-08-17	sssww	103	2000-04-26 21:15:00	2005-10-24 13:00:00	1999-09-23 05:00:00	1993-01-15 09:45:00	2005-06-04 16:00:00	1900-08-26 12:00:00	wwsws
15003	2002-07-30 04:30:00	2010-09-29 16:15:00	2009-08-20 14:15:00	2005-11-11 12:00:00	1997-11-18 06:30:00	1900-09-21 12:00:00	sssww	92	2005-11-11 12:00:00	1993-01-17 06:15:00	1997-02-17 23:30:00	2003-11-29 18:30:00	2002-07-30 04:30:00	1900-09-25 12:00:00	wwwws
15006	1962-09-30 10:30:00	2014-10-06 16:30:00	1952-11-07 00:45:00	1981-09-18 12:30:00	2000-09-20 08:45:00	1900-10-05	swwss	97	1993-01-17 13:30:00	2003-11-29 19:15:00	1990-01-10 15:15:00	2005-11-11 14:30:00	2006-12-13 18:45:00	1900-10-03	wwwww
15007	2009-08-20 11:15:00	1997-11-18 03:15:00	1991-12-22 10:45:00	2004-10-21 11:00:00	2005-11-11 08:30:00	1900-08-23	swwww	102	2004-08-11 10:30:00	1993-01-16 23:00:00	2002-07-30 19:00:00	2015-07-17 07:30:00	2004-10-21 11:00:00	1900-09-20 12:00:00	swssw
15010	2021-08-06 13:15:00	2007-10-28 07:00:00	2014-10-06 13:00:00	2009-06-17 14:45:00	2013-12-05 11:30:00	1900-09-21 12:00:00	swwsw	57	2020-08-12 06:15:00	2021-08-06 13:15:00	2021-10-31 16:30:00	2015-07-17 08:00:00	2007-10-28 07:00:00	1900-09-23 12:00:00	sswsw
15011	2007-06-22 16:15:00	2015-11-08 15:00:00	2009-07-03 20:15:00	1994-08-23 10:15:00	2012-08-17 09:45:00	1900-07-23 12:00:00	swsss	84	2002-07-30 17:00:00	1997-02-19 16:45:00	2007-06-22 16:15:00	2004-08-09 11:45:00	2010-10-29 20:00:00	1900-08-23	swssw
15012	2020-11-05 19:45:00	2000-02-27 06:45:00	2001-02-11 14:30:00	2015-12-30 04:00:00	1997-02-17 19:45:00	1900-10-16	wwwww	116	2006-11-20 01:00:00	1995-10-26 08:00:00	2001-10-15 19:00:00	2000-01-30 21:45:00	2008-03-08 13:30:00	1900-10-25	wwwww
15013	2006-09-01 12:30:00	2015-06-01 22:30:00	2021-03-10 01:15:00	1994-10-20 08:00:00	1993-10-01 12:15:00	1900-09-13	sswww	92	1993-10-01 12:15:00	2015-06-01 22:30:00	2006-11-19 22:30:00	2020-02-08 22:00:00	1993-01-15 09:30:00	1900-09-28	wswww
15014	2006-08-19 15:45:00	2009-06-13 22:00:00	2014-08-09 00:30:00	2017-06-21 21:45:00	2015-08-10 16:00:00	1900-08-13	sssss	71	2005-06-19 05:45:00	2015-08-10 16:15:00	2016-07-20 10:30:00	2012-08-15 22:00:00	2019-07-24 07:00:00	1900-09-03 12:00:00	sssss
15015	2002-10-22 01:00:00	2006-09-01 08:00:00	2018-06-02 19:30:00	2016-07-20 10:45:00	2014-10-06 08:00:00	1900-09-01 12:00:00	wsssw	81	2001-12-03 23:15:00	2006-09-01 08:15:00	2006-11-19 21:00:00	2005-06-19 06:00:00	1999-09-20 18:00:00	1900-09-15 12:00:00	wswss
15016	2011-12-08 14:15:00	1993-01-15 19:00:00	1998-11-10 03:15:00	2015-11-11 17:30:00	1994-01-27 11:45:00	1900-07-21	wwwww	136	1993-01-15 19:00:00	2018-09-19 10:45:00	2008-01-08 20:45:00	2011-12-08 14:15:00	2015-12-30 08:45:00	1900-04-15	wswww
15021	2013-12-31 10:45:00	2000-09-20 14:00:00	2011-01-15 13:30:00	2014-11-07 11:45:00	2018-12-18 21:00:00	1900-09-04	wswww	118	2016-01-07 19:30:00	2013-12-31 10:45:00	2004-08-12 02:00:00	1999-02-05 11:00:00	2012-12-23 03:45:00	1900-04-23	wwsww
15023	2020-08-11 18:45:00	1996-01-01 19:45:00	2002-08-06 21:30:00	2007-07-01 19:00:00	2010-12-10 15:30:00	1900-09-01	swssw	89	2004-08-11 08:15:00	1996-01-01 19:45:00	2010-12-10 15:30:00	1997-02-19 15:15:00	2001-10-20 16:45:00	1900-08-05 12:00:00	swsws
15024	1994-08-03 21:30:00	1997-11-16 16:00:00	1992-02-12 13:45:00	2002-07-30 15:30:00	2011-09-21 12:15:00	1900-08-07 12:00:00	swwss	73	2007-07-14 01:30:00	2004-08-18 17:15:00	1992-02-12 13:45:00	2002-07-30 15:30:00	1997-05-18 16:00:00	1900-09-04	sswss
15025	2007-10-28 06:45:00	2005-06-19 09:30:00	2020-07-27 18:30:00	1995-10-03 03:00:00	2018-06-16 22:30:00	1900-08-19	wssws	79	2014-10-06 12:15:00	1995-10-03 03:00:00	2004-12-23 08:30:00	2007-11-28 20:00:00	2004-05-09 20:45:00	1900-09-05 12:00:00	wwwws
15028	2013-05-03 17:45:00	2021-05-12 19:00:00	2015-07-17 05:45:00	2020-02-08 22:00:00	2008-12-12 21:30:00	1900-07-24	sssww	122	2004-08-11 11:15:00	1993-01-15 10:30:00	2005-01-08 09:30:00	2002-02-01 13:15:00	1999-12-25 01:30:00	1900-07-25 12:00:00	swwww
15030	1992-08-31 10:45:00	2020-10-04	2002-07-31 04:30:00	2001-01-22 18:15:00	2006-10-26 07:30:00	1900-08-29 12:00:00	swsww	119	2016-01-07 15:45:00	2020-10-04	1992-08-31 10:45:00	1994-01-03 21:45:00	1993-01-15 12:00:00	1900-06-23	wwsww
15034	2009-07-02 19:30:00	2014-07-06 22:30:00	2005-09-01 00:15:00	2019-07-24 07:30:00	2018-09-16 06:00:00	1900-09-05	sssss	69	2002-07-30 20:00:00	2018-09-16 06:00:00	2010-10-29 21:15:00	2011-10-29 18:00:00	2015-12-22 09:15:00	1900-09-21	sswww
15039	2014-07-06 21:00:00	2018-06-03 15:30:00	2002-08-06 20:00:00	2021-08-06 12:00:00	2005-06-19 06:00:00	1900-08-06	sssss	63	2019-07-24 07:15:00	2014-07-06 21:00:00	2015-08-10 17:00:00	2004-08-06 03:00:00	2005-06-19 06:00:00	1900-08-28 12:00:00	sssss
15046	2019-07-11 21:30:00	2011-07-16 16:15:00	2012-08-21 18:15:00	2015-07-17 04:30:00	2010-07-14 23:45:00	1900-07-17	sssss	88	2015-12-04 23:30:00	2019-07-11 21:30:00	2011-01-15 13:45:00	2013-01-29 00:30:00	2020-02-15 18:30:00	1900-07-14	wswww
16001	2004-09-13 03:30:00	2012-08-04 22:00:00	2020-09-30 15:45:00	2019-02-08 11:15:00	2015-07-17 06:45:00	1900-08-04	sssws	77	1991-01-01 19:45:00	2005-06-19 09:30:00	2004-09-13 03:30:00	1992-05-12 01:30:00	2012-08-04 22:00:00	1900-08-05	wssss
16003	2001-07-04 01:15:00	2012-08-04 18:15:00	1992-08-03 02:45:00	1994-08-23 07:45:00	2014-08-02 20:30:00	1900-08-03	sssss	91	2012-08-04 18:30:00	2001-07-04 01:15:00	2015-11-08 15:00:00	2002-02-01 09:15:00	2015-07-17 03:15:00	1900-08-23	sswws
16004	1998-10-21 00:15:00	2015-07-17 08:45:00	2008-12-13 01:45:00	1993-03-29 22:15:00	2002-10-12 05:45:00	1900-08-20	wswww	86	2020-08-12 02:15:00	1999-11-28 11:30:00	1998-10-21 00:15:00	2000-10-29 13:00:00	2006-12-13 19:30:00	1900-08-15	swwww
16007	2001-09-30 23:45:00	2009-07-28 23:30:00	1994-10-23 04:45:00	2015-07-17 05:15:00	2008-08-09 22:00:00	1900-09-13 12:00:00	sswss	93	2002-09-10 00:15:00	2020-08-12 03:45:00	2008-08-09 22:00:00	2001-09-30 23:45:00	2016-01-26 11:15:00	1900-08-11 12:00:00	ssssw
17001	2016-04-01 19:15:00	2002-07-30 18:00:00	2004-08-06 03:30:00	2005-09-23 08:45:00	2007-06-20 10:15:00	1900-08-02	wssss	98	2013-04-17 15:15:00	2011-02-03 20:45:00	2011-10-17 15:45:00	2006-12-13 19:45:00	1998-10-21 02:45:00	1900-08-10	wwwww
17003	2001-07-04 01:00:00	2018-06-02 17:15:00	2011-07-06 06:15:00	1999-05-12 19:45:00	2021-07-03 18:00:00	1900-07-19	sssss	43	2001-07-04 01:00:00	1999-05-12 19:45:00	2002-08-07 03:00:00	2018-06-02 17:15:00	2005-06-30 18:30:00	1900-07-19	sssss
17004	2011-02-07 12:00:00	2010-07-21 05:00:00	2008-08-10 01:00:00	2012-01-04 23:30:00	2012-10-17 13:45:00	1900-07-16	wssww	86	2011-02-07 12:30:00	1999-12-03 10:30:00	2006-03-21 12:30:00	2012-01-04 23:30:00	1999-09-29 06:15:00	1900-07-20	wwwws
17005	2019-08-04 17:15:00	1997-08-13 19:00:00	2008-08-01 10:00:00	1993-07-16 17:00:00	2020-08-12 05:00:00	1900-08-01	sssss	66	2020-08-12 05:00:00	1997-08-13 19:00:00	2000-10-29 05:30:00	1999-12-03 07:15:00	2008-08-01 10:00:00	1900-08-10	sswws
17008	2020-08-12 01:30:00	2008-04-28 10:30:00	1998-03-29 22:00:00	2015-07-17 06:45:00	1997-02-27 16:45:00	1900-07-29	swwsw	96	2006-12-13 17:00:00	2015-12-05 08:15:00	1998-11-22 03:00:00	2008-01-25 03:15:00	1998-02-11 09:00:00	1900-09-10	wwwww
17015	1992-11-01 03:45:00	2007-06-23 17:45:00	1997-09-16 13:00:00	2003-05-24 17:00:00	1998-07-06 22:15:00	1900-07-26	wssss	82	1998-07-06 22:15:00	1993-01-23 20:45:00	2002-09-10 01:30:00	1997-09-16 13:00:00	2000-09-22 10:00:00	1900-09-16	swsss
17018	2000-12-12 07:00:00	2014-10-28 11:00:00	2013-10-22 03:15:00	2019-08-09 14:30:00	2002-09-08 12:00:00	1900-10-22	wwwss	125	2000-12-12 07:00:00	2009-11-01 15:30:00	2013-10-22 03:30:00	2014-10-28 11:00:00	2002-09-08 12:00:00	1900-10-22	wwwwss
18001	2003-03-02 07:15:00	1997-05-04 11:45:00	2015-07-17 05:45:00	2011-09-25 20:00:00	2015-10-28 16:45:00	1900-08-10	wsssw	88	2003-03-02 07:15:00	2015-07-17 05:45:00	1994-12-28 18:45:00	2004-10-21 08:15:00	2015-10-28 16:45:00	1900-09-08	wswww
18002	2002-07-30 20:00:00	2004-08-09 18:00:00	2009-09-10 09:30:00	1992-10-01 08:45:00	2020-08-04 18:30:00	1900-09-10	sssws	90	2004-08-09 18:00:00	2002-07-30 20:45:00	2020-08-04 18:30:00	2012-08-29 18:00:00	2009-11-19 08:45:00	1900-08-30	ssssw
18003	2001-07-04 02:30:00	2004-08-18 18:30:00	1992-08-03 04:00:00	2019-08-09 14:00:00	2016-09-13 04:30:00	1900-08-09	sssss	82	2004-08-18 18:45:00	2001-07-04 02:30:00	2010-09-09 12:15:00	2005-11-11 06:15:00	2008-08-01 11:00:00	1900-08-15	sssws
18005	2011-09-25 21:00:00	1998-09-01 15:30:00	1998-12-08 05:00:00	2012-08-29 15:45:00	2008-08-01 12:00:00	1900-07-17	sswss	72	2011-09-25 21:00:00	2012-08-29 15:45:00	2006-06-20 22:15:00	1998-09-01 15:30:00	2016-04-01 19:30:00	1900-08-10	ssssw
18008	2016-01-29 06:45:00	2020-01-07 20:15:00	2021-10-26 22:30:00	2008-12-19 16:45:00	1993-01-17 02:45:00	1900-10-05	wwwww	137	1993-01-17 03:00:00	2016-01-29 06:45:00	2000-06-13 06:15:00	2013-05-09 08:45:00	2011-12-08 10:00:00	1900-06-14	wwssw
18010	2018-09-18 23:30:00	2017-09-25 09:00:00	2018-10-10 10:00:00	2019-10-07 21:30:00	2012-12-28 12:00:00	1900-09-16	sswww	100	2018-10-10 10:00:00	2018-09-18 23:30:00	2017-09-25 09:00:00	2008-02-21 22:45:00	2006-09-07 11:00:00	1900-09-07	wssws
18011	2012-07-18 10:15:00	2004-10-21 08:30:00	2002-07-30 19:00:00	2018-01-03 16:45:00	1993-01-15 09:30:00	1900-08-05	swsww	84	2004-08-18 19:30:00	2008-08-01 11:45:00	2002-07-30 19:00:00	2001-07-04 03:45:00	2016-03-01 02:15:00	1900-08-04	ssssw
18013	1998-07-31 22:30:00	1996-03-12 00:45:00	2011-02-04 20:30:00	2004-10-25 01:00:00	2020-08-12 07:45:00	1900-08-13	swwws	70	2011-02-04 20:30:00	2004-10-25 01:00:00	2020-08-12 07:45:00	1999-11-28 11:45:00	1993-01-23 21:15:00	1900-09-24	wwsww
18014	2009-03-10 12:45:00	2004-01-11 06:15:00	2013-12-14 12:45:00	2002-07-30 19:00:00	1996-08-23 18:30:00	1900-07-02 12:00:00	wwwss	108	1993-01-16 12:30:00	2016-01-26 09:30:00	2008-01-05 21:15:00	1995-01-31 05:00:00	2002-07-30 19:00:00	1900-07-28 12:00:00	wwwws
18020	2018-09-16 10:30:00	1997-12-10 14:00:00	2019-09-25 09:30:00	2009-07-03 15:15:00	2000-03-04 10:45:00	1900-08-17 12:00:00	swssw	93	2002-07-30 15:00:00	2019-08-09 12:45:00	2006-12-13 11:15:00	1998-10-20 20:15:00	1993-01-09 04:30:00	1900-08-01	sswww
18021	2019-02-01 03:45:00	2018-09-16 10:30:00	2005-01-19 11:15:00	2007-03-11 22:15:00	2002-07-30 13:45:00	1900-07-14	wswws	116	2002-07-30 13:45:00	1993-01-09 04:15:00	2012-11-19 06:45:00	2005-06-19 06:15:00	2009-09-08 07:15:00	1900-09-04 12:00:00	swwss
18022	2006-09-28 20:30:00	2008-01-07 16:45:00	2018-11-15 17:45:00	2002-12-04 10:30:00	2006-12-13 20:15:00	1900-10-29	swwww	106	2006-12-13 20:15:00	2002-02-07 11:15:00	2008-10-25 16:15:00	2010-04-07 00:45:00	2002-12-04 10:30:00	1900-10-23	wwwww
19001	2002-07-30 16:15:00	2000-08-02 18:15:00	2021-07-04 18:30:00	1997-08-13 23:30:00	2010-06-05 22:00:00	1900-07-30	sssss	91	2002-07-30 17:00:00	2008-08-10 01:45:00	1994-03-14 07:30:00	1997-08-13 23:30:00	2018-06-20 02:45:00	1900-08-11	sswss
19004	2016-06-07 12:30:00	2009-07-06 14:30:00	2019-06-24 16:15:00	2010-09-23 03:00:00	2012-08-29 14:45:00	1900-07-16	sssss	76	2016-06-07 12:30:00	2006-05-22 22:45:00	2012-08-29 14:45:00	2000-08-20 17:00:00	2010-09-23 03:00:00	1900-07-06	sssss
19005	2021-07-04 15:45:00	2000-07-28 18:45:00	2009-06-14 16:45:00	2013-07-23 19:00:00	2002-07-30 13:00:00	1900-07-29	sssss	76	2002-07-30 14:45:00	2021-07-04 15:45:00	2008-08-10	2000-08-02 16:00:00	2009-06-14 16:45:00	1900-08-10	sssss
19006	2004-08-11 22:00:00	2000-08-02 17:00:00	2009-07-16 19:30:00	2014-05-25 12:45:00	2007-07-23 21:45:00	1900-07-23	sssss	74	2004-08-11 22:00:00	2011-07-16 19:00:00	2019-06-24 15:30:00	2000-08-02 17:15:00	2021-07-04 16:45:00	1900-07-16	sssss
19007	2004-08-09 22:00:00	2012-08-29 17:45:00	2011-07-16 20:45:00	2014-06-04 17:15:00	1993-10-06 04:45:00	1900-07-16	ssssw	73	2012-08-29 17:45:00	2004-08-09 22:00:00	2000-04-26 22:15:00	1993-10-07 17:00:00	2001-02-06 18:45:00	1900-07-16	sswww
19010	2011-07-08 13:45:00	2018-07-28 10:00:00	2013-07-27 16:45:00	2016-06-10 04:45:00	2000-07-27 15:00:00	1900-07-28	sssss	42	2021-07-04 17:00:00	2011-07-08 13:45:00	2014-05-25 12:30:00	2020-08-11 22:00:00	2012-08-29 14:00:00	1900-07-26	sssss
19012	2000-08-02 17:00:00	2011-07-16 18:15:00	2004-08-11 21:00:00	2007-07-01 12:15:00	2005-03-30 13:45:00	1900-07-03 12:00:00	ssssw	84	2011-07-16 18:15:00	2004-08-11 21:00:00	2019-06-24 14:30:00	2000-08-02 17:15:00	2007-07-01 12:15:00	1900-08-07 12:00:00	sssss
19014	2013-07-23 19:30:00	2010-06-05 17:45:00	2016-07-20 08:30:00	2006-07-26 06:15:00	2002-07-30 13:45:00	1900-07-27 12:00:00	sssss	43	2002-07-30 13:45:00	2008-08-10 00:15:00	2013-07-23 19:30:00	2020-08-27 17:30:00	2014-05-25 13:15:00	1900-08-06 12:00:00	sssss
19017	2021-07-04 16:15:00	2016-06-25 00:45:00	2006-07-02 14:30:00	2000-08-02 16:30:00	1995-07-14 13:30:00	1900-07-29 12:00:00	sssss	52	2021-07-04 16:15:00	2019-06-24 14:00:00	2000-08-02 16:30:00	2016-06-25 00:45:00	2011-07-08 14:15:00	1900-07-11	sssss
19020	1998-09-02 16:45:00	2021-08-09 13:30:00	2019-08-07 18:30:00	2008-08-19 22:00:00	2018-09-19 11:00:00	1900-08-04	sssss	64	1997-08-13 16:30:00	2020-08-04 15:30:00	2003-09-21 23:30:00	1998-09-02 16:45:00	2010-10-30 01:15:00	1900-08-10	ssssw
19021	2012-08-05 12:00:00	2013-05-20 18:15:00	2018-06-19 22:30:00	2006-07-02 14:45:00	2008-07-29 21:00:00	1900-07-16	sssss	57	1993-10-07 17:45:00	2000-04-26 20:00:00	2014-12-22 03:30:00	2011-10-17 15:45:00	2014-06-04 16:15:00	1900-08-10	wwwws
20001	2020-08-12 02:15:00	2008-04-28 00:15:00	2000-08-28 11:45:00	2021-10-05 17:45:00	2014-06-04 18:15:00	1900-09-03	swsws	106	2020-08-12 02:15:00	1993-10-06 07:00:00	2014-06-04 18:30:00	2021-10-05 19:15:00	2000-10-09 22:00:00	1900-09-23	swsww
20002	2011-10-17 17:45:00	2007-07-22 03:30:00	2011-02-07 08:15:00	2015-12-03 21:15:00	2008-01-10 13:00:00	1900-08-01 12:00:00	wswww	88	2011-10-17 17:30:00	2018-01-24 07:15:00	2007-07-22 03:30:00	2021-10-28 07:45:00	2019-10-19 08:15:00	1900-09-08	wwsww
20003	2020-08-11 22:15:00	2008-04-27 20:30:00	2000-08-28 10:15:00	2005-10-30 14:30:00	1998-04-06 21:45:00	1900-09-03	swsww	84	2020-08-11 22:15:00	2008-04-27 20:30:00	1993-10-06 06:30:00	2012-09-26 10:30:00	2000-08-28 10:15:00	1900-09-03	swwss
20007	2011-07-09 06:30:00	2000-11-06 17:00:00	2013-05-20 20:15:00	2000-08-28 08:30:00	2016-07-20 21:15:00	1900-08-29	swsss	90	2000-11-06 17:00:00	2008-08-07 01:00:00	2010-01-16 09:00:00	2020-12-04 19:00:00	2011-07-09 06:30:00	1900-08-31	wswws
21003	1959-07-27 14:15:00	2004-08-09 04:00:00	1970-09-08 14:15:00	1972-05-26 03:15:00	1961-01-27 13:15:00	1900-08-18 12:00:00	ssssw	86	1979-01-07 12:30:00	1965-11-01 00:30:00	1962-08-03 19:00:00	1959-07-27 14:15:00	1982-12-19 14:45:00	1900-09-27	wwssw
21005	2004-08-09 02:45:00	2018-09-19 14:00:00	1996-10-24 23:30:00	2015-06-01 21:45:00	1998-08-17 04:30:00	1900-08-14	sswss	77	2004-08-09 02:45:00	2000-09-11 11:45:00	1987-10-18 14:45:00	2021-02-20 23:00:00	2018-09-19 14:00:00	1900-08-17	sswss
21006	2004-08-04 04:30:00	1986-07-31 01:00:00	1987-07-10 17:30:00	1988-07-10 09:45:00	1989-09-18 20:15:00	1900-07-22	sssss	78	2004-08-04 04:30:00	2002-03-04 06:45:00	2003-05-30 16:15:00	2007-02-27 09:45:00	2000-09-11 10:00:00	1900-08-04	swsws
21007	1967-07-14 15:45:00	1963-03-05 19:45:00	2008-05-10 18:45:00	2020-03-03 17:15:00	1983-10-04 07:45:00	1900-08-06 12:00:00	swsww	84	2003-05-30 16:45:00	1963-03-05 19:45:00	1976-01-02 20:15:00	1967-07-14 15:45:00	1975-05-13 19:45:00	1900-08-14 12:00:00	swwss
21008	2005-06-28 04:00:00	2013-04-14 12:15:00	2009-03-08 03:00:00	2007-06-16 22:15:00	2016-12-23 17:00:00	1900-08-20	swwsw	108	2005-06-28 04:00:00	1991-02-24 03:00:00	2020-02-15 23:15:00	2007-06-16 22:15:00	2016-12-23 17:00:00	1900-03-10	swwsw
21009	1985-12-21 09:30:00	2001-03-07 12:45:00	2011-10-18 01:30:00	1982-12-19 17:45:00	2016-12-23 22:15:00	1900-09-19	wwwww	106	1985-12-21 09:30:00	1982-01-11 11:30:00	1959-10-27 12:15:00	1962-08-04 06:45:00	1985-07-27 02:30:00	1900-10-11	wwwss
21011	2008-05-10 17:30:00	2003-05-30 15:45:00	1997-06-13 16:15:00	2007-06-22 18:00:00	2004-08-09 17:15:00	1900-08-06	sssss	74	2003-05-30 15:45:00	2008-05-10 17:30:00	2005-01-08 06:45:00	2015-12-30 12:00:00	2009-11-19 20:45:00	1900-07-11 12:00:00	sswww
21012	2000-07-09 18:30:00	1988-07-10 07:30:00	2013-04-14 08:15:00	2002-08-30 15:15:00	2004-08-09 17:30:00	1900-08-15	sswss	66	2007-06-16 18:15:00	2013-04-14 08:15:00	2000-07-09 18:30:00	2004-08-09 17:45:00	2016-01-27 09:15:00	1900-08-18	swssw
21013	2002-01-03 16:45:00	1972-12-12 02:15:00	2012-08-29 15:00:00	1988-07-22 04:15:00	1974-01-05 17:15:00	1900-07-30	wwssw	92	1984-11-03 21:45:00	1972-12-12 02:15:00	2012-08-29 15:00:00	2002-01-03 16:45:00	1986-03-04 19:45:00	1900-09-24	wwsww
21014	2004-08-09	2011-05-07 02:30:00	1996-07-03 11:30:00	2002-08-07 08:30:00	1997-10-10 04:15:00	1900-07-26	ssssw	48	2004-08-09	2015-12-30 08:45:00	1987-10-18 06:45:00	2013-12-30 10:45:00	1996-10-24 21:15:00	1900-08-15	swwww
21015	2009-06-14 22:30:00	2002-10-20 19:00:00	1990-09-24 16:45:00	2021-10-05 15:15:00	1992-08-30 11:45:00	1900-08-29	swsws	56	2002-10-20 19:00:00	1990-10-06 20:15:00	1990-09-24 16:45:00	2009-06-14 22:30:00	1992-08-30 11:45:00	1900-09-14	wwsss
21016	1986-06-17 14:15:00	2000-08-28 10:30:00	1987-08-17 17:30:00	2019-07-11 17:00:00	1988-04-18 20:45:00	1900-08-03	ssssw	100	1987-08-17 17:30:00	2000-08-28 10:30:00	1984-11-03 13:15:00	1986-06-17 14:15:00	2021-12-04 22:00:00	1900-08-18	sswsw
21017	2017-05-27 16:15:00	2008-08-01 06:00:00	2018-06-02 15:15:00	2007-07-18 15:00:00	2002-05-13 18:45:00	1900-08-06	sssss	75	2017-05-27 16:15:00	2008-08-01 06:00:00	2005-10-11 20:00:00	2007-07-18 15:00:00	2009-07-29 00:30:00	1900-09-11	sswss
21018	2021-11-10 12:30:00	2003-05-30 16:30:00	1998-07-31 21:30:00	1999-11-05 10:30:00	2001-08-20 12:30:00	1900-08-09	wssws	89	2021-11-10 12:30:00	2003-05-30 16:30:00	2001-08-20 12:30:00	1998-07-31 21:30:00	1999-11-05 11:00:00	1900-08-10	wsssw
21019	2000-07-29 19:15:00	2006-08-18 16:30:00	2007-10-28 06:45:00	1992-08-13	2001-09-30 23:45:00	1900-08-15	sswss	68	2005-10-11 22:15:00	2000-09-11 10:00:00	2015-12-30 09:15:00	2011-12-08 11:00:00	2018-01-24 06:00:00	1900-07-20	wswww
21020	2008-05-10 15:30:00	1998-07-31 17:45:00	2007-07-03 19:15:00	2012-08-29 11:30:00	2016-12-23 13:00:00	1900-07-13	ssssw	66	2008-05-10 15:45:00	1997-02-19 16:30:00	2002-03-10 12:00:00	1986-10-04 19:15:00	2015-12-30 07:45:00	1900-08-10	swwww
21021	2005-04-18 17:30:00	1989-01-18 08:15:00	1985-07-26 19:45:00	1997-12-18 23:00:00	1982-12-19 14:00:00	1900-08-25 12:00:00	wwsww	108	2005-04-18 17:30:00	1982-12-19 14:00:00	1989-01-18 08:15:00	1985-07-26 19:45:00	1997-12-11 11:00:00	1900-08-25 12:00:00	wwwsw
21023	2007-12-22 14:15:00	1990-10-06 20:45:00	1994-12-08 14:30:00	2010-12-10 20:00:00	1993-12-29 18:00:00	1900-07-30	wwwww	124	2010-12-10 20:00:00	2000-11-07 02:45:00	2016-01-27 15:45:00	2007-12-22 14:15:00	1993-01-24 05:00:00	1900-05-02	wwwww
21024	2000-07-09 20:15:00	2020-07-27 19:30:00	2015-07-17 11:45:00	2019-07-31 14:00:00	2011-09-06 09:00:00	1900-08-13	sssss	59	2016-06-07 15:45:00	2012-08-05 08:00:00	2011-09-06 09:00:00	2014-08-08 21:00:00	2016-12-23 15:00:00	1900-08-08	ssssw
21025	2003-05-30 22:00:00	1993-10-03 01:45:00	2004-08-04 09:30:00	2013-04-14 13:15:00	2015-05-03 17:45:00	1900-08-05	swsws	89	2003-05-30 22:00:00	2012-08-05 08:30:00	2007-06-22 17:45:00	2013-04-14 13:15:00	1993-10-03 01:45:00	1900-07-21	sssww
21026	1992-08-03 02:45:00	2018-08-12 22:15:00	1988-07-10 03:15:00	1997-07-03 17:30:00	2010-12-10 17:15:00	1900-08-14	ssssw	99	2005-10-30 12:45:00	2008-08-06 22:45:00	2015-11-08 15:45:00	1992-08-03 02:45:00	2004-08-09 15:15:00	1900-08-17	wswss
21027	2013-05-21 02:30:00	2002-11-02 23:45:00	2002-07-31 02:30:00	1990-10-06 17:45:00	2014-06-13 17:00:00	1900-07-17	swsws	82	2002-11-02 23:45:00	2002-07-31 02:30:00	1987-06-06 06:00:00	2012-06-16 20:00:00	1998-11-03 03:00:00	1900-08-03 12:00:00	wsssw
77002	2019-08-06 06:00:00	2009-07-15 23:15:00	2002-07-30 17:30:00	1996-10-12 06:30:00	1995-10-03 06:30:00	1900-08-02	sssww	85	2002-07-30 17:30:00	2005-10-11 22:30:00	1995-10-03 06:30:00	2002-10-27 07:45:00	1991-07-20 18:15:00	1900-08-24	swwws
77003	1993-11-09 17:45:00	2002-08-02 14:30:00	1997-11-18 11:00:00	2012-08-04 17:15:00	2019-07-27 16:30:00	1900-08-10	wswss	94	2002-08-02 14:30:00	1988-07-22 05:15:00	2004-08-09 17:45:00	2008-08-01 09:30:00	2000-07-09 20:45:00	1900-08-05	sssss
77004	2002-09-07 07:15:00	2010-08-10 13:45:00	1995-10-03 06:00:00	2009-07-27 07:30:00	1989-09-21 07:15:00	1900-08-14	sswss	73	2007-06-28 19:30:00	2004-08-08 23:30:00	2002-08-02 15:15:00	2000-08-18 02:00:00	2011-07-16 09:00:00	1900-08-19	sssss
78003	1989-08-21 01:00:00	2016-12-23 15:00:00	1990-10-03 00:15:00	2005-10-24 11:45:00	2000-10-25 00:15:00	1900-07-31	swwww	73	2013-04-14 12:30:00	1999-07-10 18:15:00	2015-06-01 22:00:00	2007-10-28 11:45:00	2004-08-18 20:00:00	1900-09-06	wssws
78004	1989-05-03 10:15:00	2002-05-13 20:45:00	1996-05-22 17:00:00	1998-09-08 04:15:00	2005-04-06 04:00:00	1900-06-19	ssssw	87	1992-01-01 18:15:00	1989-05-03 10:15:00	2015-06-01 20:00:00	2014-03-20 14:45:00	2000-08-14 00:45:00	1900-07-23	wssws
78005	2012-08-27 15:15:00	2004-08-08 23:30:00	2015-06-01 21:00:00	1990-06-06 18:15:00	1994-09-06 13:15:00	1900-08-04	sssss	81	1992-08-03 06:00:00	2012-08-27 15:15:00	1990-06-06 18:30:00	2015-06-01 21:00:00	2004-08-08 23:30:00	1900-08-02	sssss
78006	2002-07-30 18:15:00	1995-01-31 07:00:00	2015-06-01 19:15:00	1988-02-01 11:30:00	2005-08-24 07:15:00	1900-08-09	swsws	104	1995-01-31 07:00:00	1997-11-18 06:45:00	1991-11-10 20:30:00	1996-10-27 05:15:00	1995-10-24 21:15:00	1900-10-21	wwwww
79002	2001-05-14 14:30:00	1999-01-13 11:45:00	2000-02-10 11:00:00	1988-12-18 20:30:00	1963-09-26 04:45:00	1900-09-21 12:00:00	swwws	118	2000-02-10 11:00:00	1967-02-27 14:15:00	1999-01-13 11:45:00	1972-12-11 18:45:00	1962-08-03 17:30:00	1900-10-01	wwwws
79003	1993-03-18 14:30:00	1988-12-18 16:45:00	1988-02-01 09:00:00	2005-11-07 20:45:00	2015-06-01 18:45:00	1900-08-10	wwwws	109	1993-03-31 13:30:00	2013-12-30 11:00:00	1988-02-01 09:00:00	1988-12-18 16:45:00	2015-12-30 12:00:00	1900-08-22	wwwww
79004	2007-06-12 15:30:00	2008-05-10 18:45:00	2015-07-17 05:15:00	2013-10-03 00:45:00	1988-07-10 03:45:00	1900-08-04	sssws	75	1990-06-06 16:45:00	2001-07-03 23:45:00	2015-07-17 05:15:00	2014-03-20 11:45:00	2007-06-12 15:30:00	1900-08-23	sssws
79005	1979-10-19 08:45:00	1982-11-12 09:15:00	1970-08-16 10:00:00	1971-10-17 13:45:00	1987-04-10 19:00:00	1900-08-16	wwsww	80	1982-11-12 09:30:00	2018-08-12 22:30:00	1985-09-21 07:30:00	2020-06-16 21:45:00	1990-08-29 14:45:00	1900-09-20 12:00:00	wssss
79006	1968-09-12 09:45:00	2001-07-04 00:45:00	1972-11-09 15:00:00	1982-10-26 13:30:00	2015-06-01 20:00:00	1900-09-15 12:00:00	sswws	93	2001-07-04 01:00:00	1985-09-21 07:45:00	2018-11-29 12:15:00	2003-01-17 05:30:00	1967-10-20 09:15:00	1900-10-04 12:00:00	sswww
80001	1999-07-10 21:30:00	1995-03-01 06:15:00	2003-01-17 07:15:00	1992-03-09 12:15:00	1995-10-13 00:15:00	1900-06-22	swwww	95	1999-07-10 21:30:00	2015-12-30 12:00:00	2001-07-04 02:45:00	2019-12-10 18:00:00	2011-01-11 04:00:00	1900-07-10	swsww
80002	1994-04-05 04:45:00	1988-02-24 15:30:00	1989-02-12 06:15:00	1990-08-23 05:30:00	1990-11-03 06:15:00	1900-06-05	wwwsw	117	1994-04-05 04:45:00	2007-12-27 08:30:00	2009-11-05 17:00:00	2008-12-05 08:30:00	2013-11-20 07:45:00	1900-08-04	wwwww
80003	2006-07-31 18:45:00	2012-08-04 14:30:00	2007-07-19 13:45:00	2000-09-11 04:30:00	1991-09-21 14:15:00	1900-09-07	sssss	53	2012-08-04 14:30:00	2006-07-31 18:45:00	1992-08-02 23:45:00	1991-09-21 14:15:00	2002-09-07 14:30:00	1900-08-27	sssss
80004	2010-01-16 03:30:00	2003-01-12 19:00:00	2020-08-12 18:15:00	2012-08-04 14:45:00	2002-09-07 14:15:00	1900-08-24	wwsss	89	2002-09-07 14:45:00	2010-01-16 03:30:00	2003-01-12 19:00:00	1998-09-01 09:45:00	1988-09-04 23:00:00	1900-09-01	swwss
80005	2001-02-10 15:30:00	2012-08-29 04:45:00	2010-10-02 12:45:00	2014-08-06 18:15:00	1994-09-06 07:15:00	1900-08-26 12:00:00	wswss	67	2005-11-07 20:15:00	1994-09-06 07:15:00	2010-10-02 12:45:00	2001-02-10 15:30:00	2012-08-04 15:00:00	1900-08-18	wswws
80006	1996-02-16 13:30:00	1998-10-17 09:45:00	2013-12-30 02:00:00	2015-12-30 02:00:00	2012-11-19 05:45:00	1900-08-14	wwwww	130	1996-02-16 13:30:00	2015-12-30 05:45:00	2009-04-27 05:30:00	1998-10-17 09:45:00	1999-12-03 03:45:00	1900-10-03	wwwww
81002	1993-06-26 21:15:00	1979-09-01 23:15:00	1983-10-04 01:00:00	2011-08-10 08:15:00	1980-07-27 04:15:00	1900-08-01	sswss	58	1993-06-26 21:15:00	1982-10-01 20:45:00	1980-07-27 04:15:00	1978-08-02 21:30:00	1966-09-02 06:30:00	1900-08-27 12:00:00	swsss
81003	1999-11-05 02:30:00	1995-07-11 20:00:00	2011-07-07 06:15:00	2003-11-02 01:15:00	2021-05-03 15:15:00	1900-08-30	wssws	83	1998-10-24 10:15:00	1994-10-23 01:45:00	1988-08-18 02:15:00	2021-05-03 15:15:00	1999-11-05 02:30:00	1900-10-22	wwssw
81004	1991-11-01 06:00:00	1988-01-19 05:00:00	1989-08-11 10:15:00	1990-07-19 14:30:00	1990-10-02 18:45:00	1900-10-11	wwssw	104	1991-11-01 06:00:00	1994-12-08 07:15:00	2001-01-05 10:30:00	2016-11-12 14:15:00	2012-11-19 19:00:00	1900-10-25	wwwww
81006	1991-08-09 05:30:00	1988-10-18 14:00:00	1991-10-16 06:00:00	2003-09-22 03:45:00	2005-09-19 17:45:00	1900-09-12	swwss	74	1993-05-17 15:15:00	2000-10-25 06:45:00	1991-10-16 06:00:00	1988-10-18 14:00:00	2020-06-17 20:00:00	1900-09-22	swwws
81007	2015-07-17 03:00:00	1998-09-01 09:45:00	1992-09-12 22:00:00	2006-09-29 14:00:00	1994-07-10 00:15:00	1900-08-29	sssss	73	1992-09-12 22:00:00	2015-07-17 03:00:00	1998-08-03 10:30:00	2002-10-24 19:15:00	2004-03-19 07:30:00	1900-08-21	sssww
82001	1996-04-03 09:30:00	1980-07-26 03:30:00	1988-08-30 09:00:00	1980-11-14 09:00:00	2000-09-11 09:30:00	1900-08-20	wssws	112	1996-04-03 09:30:00	1985-09-21 04:30:00	2000-09-11 09:30:00	1980-11-14 09:00:00	1980-07-26 03:30:00	1900-08-31	wssws
82002	1994-08-01 20:45:00	2000-09-11 08:45:00	1999-05-12 16:45:00	1981-09-17 23:45:00	1985-12-31 17:15:00	1900-09-17	ssssw	85	2000-09-11 08:45:00	1994-08-01 20:45:00	1981-09-20 00:45:00	1982-12-19 02:45:00	1985-12-31 17:15:00	1900-09-12	sssww
82003	1980-07-26 04:30:00	1999-06-19 20:15:00	1991-08-09 08:15:00	2007-09-16 12:00:00	2015-06-28 11:30:00	1900-08-14	sssss	65	1979-12-19 13:30:00	2001-11-21 16:00:00	1983-10-12 09:30:00	2012-06-23 09:30:00	1982-10-17 13:30:00	1900-08-14	wwwsw
83003	2001-07-04 01:45:00	1971-09-01 15:45:00	1993-06-09 18:45:00	2004-08-09 03:45:00	1999-05-12 16:45:00	1900-07-22	sssss	101	2001-07-04 01:45:00	1994-10-23 05:15:00	2010-01-15 22:30:00	1990-05-16 17:30:00	1971-09-01 15:45:00	1900-08-04	swwss
83004	2008-01-26 15:30:00	2011-08-26 17:30:00	2001-07-04 01:30:00	1983-03-05 19:45:00	1988-07-22 02:30:00	1900-08-24	wssws	87	1985-09-21 02:30:00	1982-09-27 17:30:00	1980-07-26 22:30:00	2001-07-04 01:45:00	1982-11-05 22:45:00	1900-10-08	ssssw
83005	1999-11-28 09:00:00	2015-07-17 07:30:00	2012-08-06 16:15:00	1986-05-10 05:45:00	2016-05-02 10:45:00	1900-08-19	wssss	77	1986-05-10 05:45:00	1982-11-23 10:45:00	2012-08-06 16:15:00	1999-11-28 09:00:00	1991-11-11 09:00:00	1900-09-16	swsww
83006	2001-07-04 05:30:00	2008-08-01 12:30:00	1987-06-06 08:45:00	2012-06-22 13:30:00	2007-07-26 10:15:00	1900-08-24	sssss	70	2001-07-04 05:30:00	2007-07-26 10:15:00	2007-10-04 01:45:00	2000-09-20 06:00:00	2012-06-22 13:30:00	1900-10-03	sswss
83007	2005-09-23 08:30:00	2014-05-19 21:45:00	1992-08-30 14:30:00	2004-05-10 00:30:00	2010-01-15 20:45:00	1900-06-29	ssssw	88	1992-08-30 14:30:00	2005-09-23 08:30:00	2019-07-31 18:45:00	2014-05-19 21:45:00	2011-02-07 07:15:00	1900-06-19	sssss
83008	2005-05-19 13:15:00	2012-08-06 18:00:00	2016-11-16 08:15:00	2007-09-16 12:30:00	2004-04-15 11:15:00	1900-08-20 12:00:00	sswsw	96	1985-10-01 08:00:00	2000-07-29 21:15:00	1999-03-28 18:30:00	2005-05-19 13:15:00	2012-08-06 18:15:00	1900-08-17	wswss
83009	2020-09-30 11:15:00	1991-08-08 07:00:00	2019-08-30 02:45:00	2016-03-01 01:15:00	2005-09-19 16:30:00	1900-08-15	sssws	77	1987-12-27 13:45:00	1983-10-15 08:00:00	1986-08-13 23:15:00	2020-09-30 11:15:00	2016-03-01 01:15:00	1900-08-14	wwssw
83010	2003-05-30 15:30:00	1995-09-13 16:30:00	1997-09-14 04:30:00	2002-08-06 23:45:00	2001-07-04 00:30:00	1900-09-09	sssss	79	1987-12-26 06:45:00	2007-12-02 00:30:00	1990-03-06 03:45:00	2003-09-22 00:15:00	1985-09-21 03:30:00	1900-09-21	wwwss
83011	2000-09-11 07:45:00	2001-07-03 23:15:00	2021-12-08 12:45:00	1999-05-12 12:45:00	2017-10-04 09:45:00	1900-10-09	sswsw	67	2010-01-16 08:30:00	2000-10-25 02:15:00	1994-01-14 01:00:00	2000-09-20 05:30:00	1994-12-08 07:15:00	1900-10-09	wwwsw
83013	2010-12-28 10:00:00	2012-08-06 14:30:00	2005-05-26 09:30:00	2015-11-12 18:00:00	2009-11-25 13:15:00	1900-10-08	wssww	74	2012-08-06 14:30:00	2005-05-26 09:30:00	2010-12-28 10:00:00	2009-11-25 13:15:00	2007-07-18 17:30:00	1900-09-30	sswws
84001	1960-07-12 13:30:00	1985-10-01 05:45:00	1956-08-13 09:15:00	1966-09-04 06:30:00	2000-09-11 13:30:00	1900-09-04 12:00:00	swsss	105	1985-10-01 05:45:00	1960-07-12 13:30:00	1956-08-13 09:15:00	1994-02-01 11:15:00	1983-10-18 10:15:00	1900-08-12 12:00:00	wssww
84003	1999-07-21 13:00:00	1972-01-24 11:00:00	1975-12-02 16:15:00	1968-10-03 10:00:00	1973-02-20 17:15:00	1900-08-16	swwww	110	1999-07-21 13:00:00	2008-02-05 15:15:00	2009-05-04 08:15:00	1972-01-24 11:00:00	2006-01-22 22:30:00	1900-09-11	swsww
84004	1995-03-25 09:00:00	2017-11-07 15:30:00	2010-01-16 04:00:00	1982-12-19 09:15:00	1979-01-15 23:15:00	1900-10-03	wwwww	107	1995-03-25 09:00:00	2013-12-30 20:00:00	1981-09-20 08:30:00	1982-02-09 00:30:00	1979-11-25 18:00:00	1900-09-20	wwsww
84005	1987-08-20 21:30:00	1985-09-21 04:00:00	2009-05-06 23:45:00	1973-12-11 11:45:00	1995-10-22 11:15:00	1900-09-10	sssww	101	1985-09-21 04:00:00	1973-12-11 11:45:00	1982-12-19 07:45:00	1987-08-20 21:30:00	1991-12-22 08:15:00	1900-09-11 12:00:00	swwsw
84006	1976-05-22 03:00:00	1981-09-18 03:00:00	2020-08-04 13:00:00	2021-09-30 08:15:00	2009-09-08 07:15:00	1900-06-01 12:00:00	sssss	67	1981-09-18 03:00:00	1976-05-22 03:15:00	1982-09-27 15:30:00	1999-04-20 09:00:00	2020-08-04 14:15:00	1900-06-26 12:00:00	sssws
84008	2011-08-26 16:00:00	2004-08-08 22:00:00	2020-06-10 16:15:00	1994-07-31 19:15:00	2016-07-20 09:45:00	1900-07-31	sssss	89	2008-09-02 21:15:00	2004-12-14 12:30:00	2012-08-04 19:45:00	2006-05-04 22:00:00	1994-02-01 07:15:00	1900-09-20	swssw
84009	2001-07-04 00:15:00	1978-06-22 20:15:00	2007-07-18 18:00:00	2018-06-01 16:00:00	1999-07-10 19:15:00	1900-08-05	sssss	87	2001-07-04 00:15:00	2007-07-18 18:00:00	1982-09-27 14:15:00	1982-12-19 04:15:00	2000-09-11 09:45:00	1900-08-20	sssws
84011	2008-07-31 04:00:00	1994-07-31 21:00:00	2014-05-20	1988-10-19 04:15:00	1981-09-17 03:45:00	1900-08-05	sssws	90	1981-01-01	1999-11-26 12:15:00	1983-02-04 18:30:00	1980-09-07 09:45:00	1986-08-14 02:45:00	1900-08-09	wwwss
84012	1994-12-28 14:00:00	1985-09-30 23:45:00	1990-02-06 09:45:00	1981-09-20 04:30:00	1989-03-19 13:30:00	1900-09-20	wswsw	116	1994-12-28 14:00:00	1981-09-20 04:30:00	1981-10-01 09:00:00	1985-09-30 23:45:00	1979-12-26 23:45:00	1900-08-05	wswsw
84013	1995-03-25 09:00:00	1981-01-18 00:30:00	1982-12-19 07:30:00	1987-12-26 14:15:00	1985-10-01 04:45:00	1900-09-13	wwwww	105	1981-01-18 00:30:00	1992-11-02 10:00:00	1995-03-25 09:00:00	1989-09-04 11:45:00	1985-10-01 04:45:00	1900-10-11	wwwsw
84014	1993-07-08 18:15:00	1979-03-25 09:00:00	1997-04-24 02:00:00	1984-10-04 02:30:00	1989-09-22 09:00:00	1900-08-05	swwws	86	1994-03-03 06:00:00	2002-08-07 01:45:00	1984-01-13 03:30:00	1980-11-20 16:15:00	1979-03-08 09:00:00	1900-09-04	wswww
84016	2002-07-30 16:15:00	2005-06-09 08:30:00	2001-07-04	1997-09-16 11:15:00	1988-08-18 15:30:00	1900-08-01	sssss	91	2002-07-30 16:15:00	1988-08-18 15:30:00	1997-09-16 11:15:00	2012-06-22 13:45:00	2005-06-09 08:30:00	1900-08-14	sssss
84017	2008-01-13 09:00:00	1979-12-27 12:45:00	2006-09-20 09:45:00	2005-04-06 14:45:00	2015-10-24 05:45:00	1900-08-07	wwsww	91	2008-01-13 09:00:00	1979-12-27 12:45:00	1991-06-14 09:45:00	1987-08-16 05:00:00	1982-12-14 10:00:00	1900-09-08	wwssw
84018	1995-03-25 09:00:00	1995-11-16 02:15:00	1988-07-22 10:30:00	2012-01-05 00:15:00	2007-01-03 15:30:00	1900-08-24 12:00:00	wwsww	139	1995-03-25 09:00:00	1992-05-13 00:45:00	2012-01-05 00:15:00	2012-11-22 19:15:00	1995-11-16 02:15:00	1900-03-28	wswww
84019	2001-07-03 22:45:00	2005-06-30 17:00:00	2020-08-12 05:15:00	2016-07-20 08:45:00	1995-07-14 12:30:00	1900-08-06	sssss	60	2000-09-12 08:45:00	2001-07-03 22:45:00	1992-05-21 08:00:00	2003-11-29 19:15:00	2020-08-12 05:15:00	1900-08-06	sssws
84020	2019-07-31 20:00:00	2015-10-06 10:30:00	2007-06-22 19:15:00	2009-05-09 14:00:00	2002-08-15 04:00:00	1900-08-26	swsss	68	2002-07-30 16:45:00	1991-01-01 16:45:00	1984-10-29 10:00:00	1986-08-16 03:00:00	2009-05-09 14:00:00	1900-09-20	swwss
84022	1992-11-12 10:45:00	2020-06-17 22:00:00	2000-08-09 15:30:00	1994-08-24 18:30:00	1988-08-18 06:00:00	1900-08-09	wssss	80	2007-06-22 17:45:00	2010-12-28 13:00:00	1988-08-18 06:00:00	2010-01-15 19:30:00	1999-05-12 17:15:00	1900-08-05	swsws
84023	1991-08-09 04:00:00	2000-08-02 16:45:00	1989-10-31 07:45:00	2003-01-26 05:00:00	1998-04-29 21:00:00	1900-08-09	sswww	81	2019-08-31 10:00:00	2005-06-30 17:15:00	1988-08-18 16:00:00	1993-03-17 04:00:00	1992-08-12 23:15:00	1900-08-07	sssws
84025	2000-08-02 15:45:00	2001-07-04 01:15:00	2010-12-28 06:30:00	2002-07-30 16:00:00	2016-07-20 10:30:00	1900-08-14	sswss	67	2010-12-28 06:30:00	1986-12-30 11:45:00	2002-07-30 16:00:00	1988-11-30 01:45:00	2001-07-04 01:15:00	1900-08-14	wwsws
84026	2021-07-04 14:00:00	1980-07-26 01:15:00	2004-08-17 14:30:00	2011-07-17 17:30:00	2008-07-03 15:30:00	1900-08-14	sssss	71	1998-09-02 17:30:00	2002-07-30 15:30:00	2000-09-24 17:30:00	1987-08-16	2011-07-17 17:30:00	1900-08-15	sssss
84029	2003-05-30 14:30:00	1992-08-30 14:30:00	1993-09-10 19:30:00	2002-07-30 16:15:00	2015-02-28 18:15:00	1900-08-06	ssssw	94	2002-07-30 16:30:00	2003-05-30 14:45:00	2000-09-20 04:30:00	2011-10-17 15:00:00	2016-01-10 18:15:00	1900-09-17	sssww
84035	2011-08-26 14:45:00	1997-07-13 15:45:00	2016-07-20 08:15:00	2019-08-03 18:15:00	2000-09-01 15:15:00	1900-07-27	sssss	50	2001-07-03 23:45:00	1997-07-13 15:45:00	1991-07-08 12:30:00	1994-11-14 15:30:00	2006-08-01 17:30:00	1900-08-03	sssws
84037	2010-01-16 07:30:00	1989-09-24 15:15:00	2021-05-13 17:00:00	2001-07-04 02:30:00	1994-10-23 02:45:00	1900-07-11	wsssw	115	2010-01-16 07:30:00	2001-07-04 02:30:00	2013-12-30 08:00:00	2002-02-22 06:00:00	2015-01-15 03:45:00	1900-07-14 12:00:00	wswww
84040	2010-12-29 18:30:00	2015-06-01 20:15:00	2007-10-28 05:15:00	2017-11-07 07:30:00	2020-08-25 14:00:00	1900-08-25	wswws	86	2015-12-30 09:45:00	2015-06-01 20:15:00	2006-11-19 21:15:00	2010-12-29 18:30:00	2009-11-19 17:45:00	1900-09-07 12:00:00	wswww
85001	1990-07-17 05:45:00	1981-09-18 08:00:00	1978-10-03 13:15:00	1978-04-17 17:30:00	1980-05-30 14:45:00	1900-08-01	sswws	74	1992-03-18 16:00:00	1990-07-17 05:45:00	1982-07-01	2009-07-21 12:15:00	2004-03-19 04:15:00	1900-08-07	wsssw
85002	1982-09-10 11:15:00	1985-10-01 03:15:00	1986-12-05 01:45:00	1988-10-19 04:30:00	1981-09-23 16:45:00	1900-08-22	swwws	109	1982-09-10 11:15:00	1986-12-05 01:45:00	1993-05-18 09:30:00	1981-05-01	1985-10-01 03:15:00	1900-08-23	swssw
85003	2008-07-30 01:30:00	2005-08-31 19:00:00	2015-08-10 14:30:00	2000-09-06 05:00:00	1991-07-01 14:00:00	1900-08-19	sssss	76	2012-06-28 17:15:00	2006-09-29 16:00:00	2019-08-04 18:15:00	2005-08-31 19:00:00	2000-09-06 05:00:00	1900-09-10	sssss
85004	2013-07-03 09:00:00	2010-09-11 06:15:00	2011-07-07 17:30:00	1994-08-24 16:15:00	1986-03-08 16:15:00	1900-08-01	ssssw	77	2000-06-08 10:45:00	1998-02-11 09:00:00	1994-08-24 16:15:00	1986-01-10 03:00:00	2000-10-17 23:45:00	1900-09-10	swsww
88001	2010-09-11 06:00:00	2018-12-18 10:30:00	2000-09-11 07:45:00	1996-02-05 07:45:00	2010-10-01 11:00:00	1900-10-11	swsww	108	2018-12-18 10:30:00	1997-11-17 23:30:00	2012-11-19 02:15:00	1998-10-24 11:00:00	2019-10-06 01:15:00	1900-10-26	wwwww
89002	2001-07-06 17:30:00	2004-05-10 17:15:00	1999-05-21 07:00:00	1995-03-23 09:00:00	1996-07-03 10:15:00	1900-07-04	sssws	93	2001-07-06 17:30:00	1995-03-23 09:00:00	1996-07-03 10:15:00	2004-05-10 17:15:00	2015-08-10 14:15:00	1900-09-11	swsss
89003	2018-12-18 15:15:00	1994-08-03 20:00:00	1995-03-23 09:00:00	1996-10-04 10:30:00	2015-08-10 14:30:00	1900-08-08 12:00:00	wswws	102	1996-10-04 10:30:00	2018-12-18 15:15:00	1983-01-01 08:00:00	1995-03-23 09:00:00	1991-04-01 08:30:00	1900-09-27	wwwww
89004	2004-05-10 19:00:00	2003-04-01 01:30:00	2010-04-05 06:30:00	2013-10-03 01:30:00	2006-01-09 19:15:00	1900-07-22 12:00:00	swwww	93	1995-07-20 05:30:00	1997-04-23 15:45:00	1995-10-02 19:15:00	1999-06-19 14:30:00	1997-12-05 22:15:00	1900-08-30	swwsw
89005	2000-09-06 04:45:00	2004-10-06 05:45:00	1995-03-23 09:00:00	2006-09-01 05:30:00	2011-02-03 18:00:00	1900-08-11 12:00:00	swwsw	101	2014-10-28 05:45:00	2004-10-06 05:45:00	2010-10-29 18:00:00	1983-12-27 12:45:00	2010-09-13 15:30:00	1900-10-09	wwwws
89006	1991-04-11 05:00:00	1992-05-05 22:00:00	1998-02-12 11:15:00	2012-11-19 05:15:00	1980-08-11 14:45:00	1900-08-10	wswws	87	1991-04-11 05:00:00	1998-02-12 11:15:00	2018-09-15 12:30:00	1992-05-05 22:00:00	2019-09-08 10:15:00	1900-09-18	wwsss
89007	2007-06-12 18:45:00	1991-10-16 01:45:00	2000-09-06 04:15:00	1994-02-01 09:00:00	1986-08-13 22:30:00	1900-08-17	swsws	76	1983-10-15 06:45:00	2007-06-12 18:45:00	2017-08-23 04:15:00	1988-09-06 18:45:00	1991-10-16 01:45:00	1900-09-07	wsssw
89008	2018-06-03 17:30:00	2003-07-19 13:00:00	2012-06-26 16:15:00	2014-08-03 15:00:00	2021-08-08 14:45:00	1900-08-27	sssss	76	2012-06-26 16:15:00	2002-08-15 02:00:00	2004-08-09 08:30:00	1985-10-04 03:45:00	2005-08-31 17:30:00	1900-08-20	sssws
90003	2021-08-11 16:45:00	2012-06-28 19:30:00	2013-04-14 01:45:00	2014-10-03 05:30:00	2007-07-14 02:30:00	1900-08-23 12:00:00	sswws	78	2008-07-31 04:30:00	2001-09-12 11:30:00	2001-10-01	1995-07-19 17:00:00	2020-01-02 13:15:00	1900-09-10	sswsw
91002	1998-12-15 05:45:00	1998-03-01 06:30:00	2006-10-06 02:45:00	1980-10-28 13:15:00	1992-01-01 04:45:00	1900-08-09	wwwww	87	2012-06-28 21:45:00	1998-12-15 06:00:00	1980-07-26 02:00:00	1998-03-01 06:30:00	2017-12-06 10:15:00	1900-09-27 12:00:00	swsww
92001	2015-01-09 01:30:00	2002-01-28 05:30:00	2016-01-29 07:15:00	2010-11-08 07:00:00	1999-11-30 03:00:00	1900-10-19 12:00:00	wwwww	124	2020-10-15 14:45:00	2002-01-28 05:30:00	2011-12-08 15:15:00	2013-12-05 06:30:00	2016-12-26 06:15:00	1900-02-16	wwwww
92002	2003-07-18 13:45:00	2007-06-21 15:45:00	2009-07-17 18:45:00	2012-07-22 17:15:00	2004-08-26 18:30:00	1900-08-14	sssss	66	2007-06-21 15:45:00	2005-11-14 16:45:00	2003-07-18 13:45:00	2017-08-23 05:00:00	1987-08-20 13:45:00	1900-09-10	swsss
92003	2005-11-20 13:45:00	2003-05-07 18:30:00	2004-08-10 12:45:00	2002-02-21 15:00:00	2000-09-11 09:15:00	1900-07-29	wssws	78	2005-11-11 22:15:00	2001-12-03 16:30:00	2005-01-11 14:00:00	2004-09-12 21:15:00	2000-12-02 02:45:00	1900-08-28	wwwsw
92004	2021-10-26 22:00:00	2008-07-31 04:45:00	2009-07-26 09:45:00	2010-07-01 10:30:00	2011-05-07 20:30:00	1900-07-26	wssss	88	2014-02-06 15:45:00	2021-08-08 18:45:00	2010-12-27 15:30:00	2012-01-18 02:30:00	2019-08-31 09:15:00	1900-08-31	wswws
93001	2013-09-15 07:30:00	2012-01-18 01:30:00	2011-09-06 08:15:00	2014-10-19 09:00:00	2019-07-24 07:45:00	1900-09-13	swsws	107	1983-12-31 09:30:00	2007-01-15 01:00:00	1990-09-18 19:15:00	1990-12-11 09:00:00	2008-10-20 02:00:00	1900-09-14 12:00:00	wwsww
93002	2007-06-21 18:00:00	2006-09-24 20:45:00	2004-08-18 16:45:00	2013-09-15 07:45:00	2016-06-24 19:45:00	1900-07-20	sssss	68	2005-09-13 10:45:00	2018-10-23 05:15:00	2016-02-01 02:45:00	2004-08-18 16:45:00	2013-09-15 07:45:00	1900-09-07	swwss
94001	2009-10-03 10:45:00	2021-11-27 02:30:00	1986-11-05 06:15:00	1972-04-14 13:15:00	1972-12-11 19:15:00	1900-10-25	wwwww	107	2011-12-26 15:15:00	2015-01-12 10:30:00	2016-01-29 07:30:00	2006-12-04 05:00:00	2008-11-14 16:45:00	1900-04-15	wwwww
94003	2016-08-03 15:15:00	2011-12-19 15:15:00	2013-07-29 19:00:00	2021-11-04 15:15:00	2011-07-13 12:00:00	1900-08-26 12:00:00	swsws	101	2013-07-29 19:00:00	2016-08-03 15:15:00	2011-12-19 15:15:00	2014-08-11 12:45:00	2020-09-13 12:00:00	1900-08-28	sswss
95001	2008-10-29 12:30:00	1981-09-20 17:30:00	2011-10-18 13:30:00	1991-10-18 12:30:00	2015-12-09 14:15:00	1900-10-18	wswww	85	2008-10-29 12:30:00	2002-05-28 15:15:00	1981-09-20 17:45:00	2011-10-18 13:15:00	2004-01-19 12:30:00	1900-10-04	wssww
95002	2011-07-10 15:15:00	2003-04-01 01:00:00	2012-02-04 15:15:00	2014-08-03 19:00:00	2007-07-05 20:00:00	1900-08-25	swwss	110	2015-08-10 16:30:00	2015-12-30 04:45:00	2003-04-01 01:00:00	1990-01-14 21:15:00	1992-01-06 09:00:00	1900-09-14	swwww
95003	2015-08-10 16:30:00	2014-08-06 14:30:00	2011-07-10 06:30:00	2019-09-27 14:00:00	2021-07-10 17:15:00	1900-08-08 12:00:00	sssss	50	2014-08-06 14:30:00	2018-10-23 02:15:00	2015-08-10 16:30:00	2017-10-07 07:30:00	2011-07-10 06:30:00	1900-08-08	swsws
95004	2017-08-25 14:30:00	2015-08-10 17:15:00	2014-08-06 14:30:00	2019-07-24 09:15:00	2010-08-23 21:15:00	1900-08-10	sssss	68	2017-08-25 14:30:00	2015-08-10 17:30:00	2019-07-24 09:15:00	2016-02-01 04:15:00	2021-10-26 11:45:00	1900-08-23	ssssw
95005	2006-10-26 23:15:00	2009-02-16 18:00:00	2013-12-05 02:15:00	2005-11-14 18:15:00	2019-05-26 17:00:00	1900-10-09	wwwws	129	2006-10-26 23:15:00	2009-02-16 18:00:00	2005-11-14 18:15:00	2021-11-20 09:45:00	2014-08-11 09:00:00	1900-09-15	wwwws
95006	2014-08-11 10:30:00	2014-10-08 01:45:00	2013-09-16 21:30:00	2019-01-13 01:45:00	2016-01-29 04:45:00	1900-08-11	swsww	129	2019-01-13 03:45:00	2010-12-10 20:00:00	2014-10-08 01:45:00	2008-01-27 03:15:00	2014-08-11 10:45:00	1900-03-15	wwwws
96001	1980-08-01 18:45:00	1988-07-07 13:00:00	1982-05-22 19:15:00	1985-12-31 13:30:00	1987-01-19 10:00:00	1900-08-01	sssww	86	1987-01-19 10:00:00	2010-01-13 14:45:00	1988-07-07 13:15:00	1980-07-26 04:00:00	1985-12-31 13:30:00	1900-08-24	wwssw
96002	2010-01-14 11:15:00	1998-06-27 16:30:00	1996-01-02 11:00:00	1985-12-01 06:30:00	2013-05-13 23:00:00	1900-07-30	wswws	100	2010-01-14 11:15:00	1998-06-27 16:30:00	1983-10-04 18:30:00	2006-10-26 18:00:00	1985-12-01 06:30:00	1900-09-07 12:00:00	wswww
96003	1998-06-27 18:15:00	2010-12-28 13:30:00	1996-01-02 06:45:00	1985-12-31 15:00:00	2005-06-13 04:15:00	1900-07-01	swwws	100	1998-06-27 18:30:00	2010-12-28 13:30:00	1996-01-02 06:45:00	1985-12-31 15:00:00	1989-04-12 04:30:00	1900-08-01	swwww
96004	2002-09-25 14:15:00	2013-06-22 18:00:00	2006-07-11 07:15:00	2011-07-16 13:30:00	2007-07-03 14:45:00	1900-08-25	sssss	78	2016-07-20 04:45:00	2017-08-25 16:00:00	1995-09-08	2015-08-10 18:15:00	2014-08-11 04:45:00	1900-08-25	sssss
96005	2015-08-10 19:00:00	2010-12-10 15:00:00	2016-11-16 03:45:00	2010-09-20 03:00:00	2011-11-23 05:15:00	1900-08-17	swwsw	77	2010-12-10 15:00:00	2016-11-16 03:45:00	2015-08-10 19:15:00	2011-11-23 05:15:00	2007-12-07 04:30:00	1900-09-15 12:00:00	wwsww
96006	2019-07-11 16:00:00	2012-01-21 05:30:00	2014-10-28 05:30:00	2017-06-06 21:30:00	2016-01-08 03:00:00	1900-08-28	swwsw	109	2014-08-11 06:00:00	2019-07-11 16:00:00	2012-01-21 05:30:00	2021-08-04 23:15:00	2008-09-01 15:30:00	1900-08-11	sswss
97002	2010-12-28 10:15:00	1978-02-23 05:00:00	1985-12-31 15:15:00	2010-01-14 12:30:00	2014-08-11 04:45:00	1900-09-24	wwwws	125	2006-10-26 14:00:00	1978-02-23 05:00:00	2010-01-14 12:30:00	2010-12-28 10:15:00	1985-12-31 15:15:00	1900-08-14 12:00:00	wwwww
105001	2010-01-15 08:30:00	2008-04-25 23:30:00	2016-02-16 11:15:00	2019-02-15 22:15:00	2012-02-04 13:30:00	1900-05-27	wwwww	115	2010-01-15 08:30:00	2016-09-24 09:00:00	2001-06-19 12:30:00	2010-12-04 21:00:00	2001-10-29 03:30:00	1900-09-14	wssww
106001	1998-07-21 20:15:00	2011-10-24 01:15:00	2000-10-03 20:45:00	1998-11-06 18:30:00	2013-12-05 05:00:00	1900-10-04	swwww	118	1998-07-21 21:00:00	2010-01-16 07:45:00	2007-08-06 22:00:00	2011-10-24 01:15:00	2000-02-10 03:45:00	1900-10-15	swsww
106002	2021-09-09 12:45:00	2014-10-03 01:30:00	2013-08-02	2016-09-23 16:45:00	2007-10-26 07:15:00	1900-09-26	swssw	67	2013-10-22 19:45:00	2011-11-22 23:45:00	2015-03-28 07:00:00	2019-08-28 02:45:00	2013-08-02	1900-09-17	wwwss
106003	2011-08-04 08:30:00	2013-07-26 14:15:00	2012-08-07 12:15:00	2014-07-31 07:30:00	2010-07-01 09:00:00	1900-08-08	sssss	37	2017-08-23 00:30:00	2021-11-12 10:30:00	2019-08-28 01:00:00	2014-10-19 04:00:00	2020-10-31 08:15:00	1900-08-23	swsww
107001	2007-12-03 12:00:00	2017-06-07 12:30:00	2015-01-13 00:15:00	2012-10-20 05:15:00	2006-10-26 15:15:00	1900-09-01 12:00:00	wswww	112	2005-03-16 09:00:00	2017-06-07 12:30:00	2006-10-26 15:15:00	2013-11-03 06:45:00	2011-08-28 13:00:00	1900-09-15	wswws
108001	2002-06-26 06:15:00	2006-05-24 19:15:00	2009-10-27 11:30:00	2008-11-04 15:30:00	2003-10-22 10:30:00	1900-09-07	sswww	94	2007-08-20 10:45:00	2005-08-31 23:45:00	2008-10-04 10:45:00	2010-07-11 06:15:00	2011-12-08 14:00:00	1900-09-25	sswsw
id	top1_l	top2_l	top3_l	top4_l	top5_l	median_l		std_l	top1_f	top2_f	top3_f	top4_f	top5_f	median_f	Season

## Sheet: Sorted
	Level								Discharge
1001	2010-12-28 06:45:00	2012-10-20 04:30:00	1999-04-21 04:00:00	2020-02-29 08:00:00	1996-01-01 18:15:00	1900-07-09	wwwws	95	2006-10-12 01:45:00	1997-07-01 09:30:00	2010-08-05 23:30:00	2012-10-20 04:30:00	2016-06-24 15:45:00	1900-10-07	wssws	89
2001	1980-07-26 04:45:00	1978-02-23 02:45:00	1981-12-13 16:30:00	2001-02-11 14:30:00	1988-10-26 04:15:00	1900-08-31	swwww	118	1980-07-26 05:00:00	1978-02-23 02:45:00	2001-02-11 14:30:00	1988-01-20 11:45:00	1980-11-24 17:15:00	1900-10-04	swwww	120
2002	2013-02-05 15:15:00	2014-08-11 08:30:00	2006-10-02 05:30:00	2014-10-07 18:00:00	2002-02-22 00:45:00	1900-09-24 12:00:00	wswww	105	2013-02-05 15:15:00	2014-08-11 10:00:00	2005-11-26 02:15:00	2006-10-26 07:15:00	2002-01-28 14:15:00	1900-08-31 12:00:00	wswww	131
3002	2004-09-12 06:15:00	2017-11-07 00:30:00	2016-08-08 02:45:00	2011-09-06 12:00:00	1975-07-15 01:00:00	1900-09-06	swsss	86	2018-10-23 04:45:00	2017-11-07 00:30:00	2014-10-07 14:00:00	2016-08-08 02:45:00	2005-12-15 19:45:00	1900-09-26	wwwsw	98
3003	2014-08-29 15:30:00	2015-08-10 17:30:00	2012-08-21 20:30:00	2013-07-29 19:30:00	2001-01-24 14:15:00	1900-08-10	ssssw	92	2015-08-10 17:45:00	1978-10-05 11:30:00	1990-03-10 13:15:00	2013-07-29 19:30:00	2014-08-29 15:30:00	1900-09-11	swwss	96
3004	2006-07-11 09:15:00	2013-04-16 20:45:00	2011-07-16 15:15:00	2019-07-31 10:45:00	2001-05-29 03:00:00	1900-08-02	swsss	90	2014-08-06 18:00:00	2019-07-31 10:45:00	2006-07-11 09:15:00	2001-05-29 03:00:00	2010-12-30 11:45:00	1900-08-02	ssssw	95
3006	2014-08-11 06:15:00	2013-09-03 10:00:00	2008-03-21 14:30:00	2021-11-18 04:45:00	2016-12-23 20:15:00	1900-08-22 12:00:00	sswww	122	2014-08-11 06:15:00	2013-09-03 10:00:00	2018-10-23 03:00:00	2012-01-12 01:00:00	2021-11-18 04:45:00	1900-09-15	sswww	129
4001	1979-02-26 15:30:00	2010-11-03 12:45:00	1982-10-01 09:00:00	1987-01-13 17:00:00	2016-01-29 09:30:00	1900-06-18	wwwww	130	1979-02-26 15:30:00	1980-12-14 18:30:00	1981-10-28 17:30:00	1979-10-22 07:45:00	1982-10-01 09:00:00	1900-05-04	wwwww	141
4003	1975-07-15	1977-08-25 08:15:00	1974-07-12 21:30:00	2019-07-10 14:30:00	1980-06-06 19:45:00	1900-08-06	sssss	64	1975-07-15	2019-07-10 14:30:00	1977-08-25 08:15:00	2012-08-06 23:15:00	2006-10-26 08:15:00	1900-08-17 12:00:00	ssssw	85
4005	2007-07-03 14:15:00	2019-07-30 21:30:00	2004-08-16 18:15:00	1988-07-07 15:45:00	1992-01-06 08:15:00	1900-07-30	ssssw	87	2004-12-21 21:15:00	2004-02-02 17:15:00	2003-03-09 11:00:00	2019-07-30 21:30:00	2007-07-03 14:15:00	1900-07-30	wwwss	128
4006	2010-01-16 06:30:00	1990-12-11 06:00:00	2010-12-29 22:45:00	2001-01-24 14:15:00	1996-01-04 08:30:00	1900-09-11	wwwww	120	2010-01-16 06:30:00	2013-12-14 15:45:00	2013-01-02 19:00:00	2014-10-21 06:00:00	2010-12-29 22:45:00	1900-05-05	wwwww	134
4007	2002-08-06 22:00:00	2020-01-11 03:30:00	2018-10-23 07:00:00	2005-12-15 21:00:00	2017-08-25 18:15:00	1900-09-15	swwws	111	2020-01-11 03:45:00	2010-12-10 12:30:00	2018-01-28 22:45:00	2005-12-15 21:00:00	2017-08-25 18:30:00	1900-07-28	wwwws	132
4008	2015-08-10 19:30:00	2011-06-13 11:00:00	2006-10-24 05:15:00	1998-05-14 18:30:00	2000-08-27 23:45:00	1900-08-10	sswss	90	2006-10-24 05:15:00	2011-12-08 15:00:00	2015-01-15 13:00:00	1997-05-19 04:00:00	2017-11-21 21:15:00	1900-08-20	wwwsw	124
4009	1997-07-01 08:00:00	2000-08-18 21:30:00	1995-11-26 23:30:00	2010-12-10 13:45:00	1998-06-25 13:30:00	1900-07-11	sswws	56	2013-12-28 09:00:00	2014-10-28 05:15:00	2000-08-18 21:30:00	2004-08-18 17:45:00	2002-02-21 20:00:00	1900-08-19	wwssw	108
4010	2016-02-01 05:00:00	2019-07-30 20:30:00	2020-01-07 14:30:00	2016-12-23 12:15:00	2014-12-09 12:45:00	1900-10-24 12:00:00	wswww	134	2020-01-07 14:30:00	2016-01-29 05:45:00	2013-12-05 05:30:00	2019-07-30 20:45:00	2015-01-09 23:45:00	1900-08-06 12:00:00	wwwsw	146
4011	2016-06-07 14:30:00	2012-07-22 16:30:00	2019-07-30 19:30:00	2015-06-25 17:15:00	2013-09-15 07:30:00	1900-08-12 12:00:00	sssss	83	2016-06-07 14:30:00	2019-07-30 19:30:00	2012-07-22 16:30:00	2016-10-18 00:45:00	2011-09-25 17:45:00	1900-07-26 12:00:00	sssws	92
5003	1989-04-13 01:45:00	1990-02-14 13:45:00	1990-11-12 17:30:00	1991-10-28 17:30:00	1993-04-23 04:45:00	1900-06-18	wwwww	103	1990-02-14 13:45:00	1993-04-23 04:45:00	2009-02-13 09:45:00	2009-12-06 17:00:00	2018-08-27 17:15:00	1900-04-27 12:00:00	wwwws	112
5004	2021-07-05 20:00:00	2008-12-03 22:00:00	2017-08-26 01:45:00	2013-04-14 04:15:00	2005-09-26 14:45:00	1900-08-19 12:00:00	swsws	82	2008-10-25 10:15:00	1997-03-01 09:00:00	2015-11-08 16:00:00	1995-09-23 19:30:00	2021-07-05 20:00:00	1900-09-03	wwwss	111
6007	2013-02-04 13:45:00	1977-11-08 19:45:00	2020-10-24 07:30:00	2002-03-10 22:00:00	2020-02-09 15:15:00	1900-10-06	wwwww	130	2016-05-05 12:30:00	1976-01-27 07:00:00	1995-10-25 01:30:00	1977-11-08 19:45:00	1972-12-04 21:45:00	1900-08-31	swwww	136
6008	1981-11-20 06:45:00	1992-01-06 11:15:00	2015-12-04 19:15:00	1990-12-28 12:00:00	1999-01-15 11:45:00	1900-08-19	wwwww	126	1980-07-27 09:00:00	2015-03-07 05:30:00	2006-12-01 01:15:00	1990-02-05 02:15:00	1994-03-05 01:00:00	1900-10-01	swwww	133
6011	2018-06-02 18:30:00	2012-06-28 18:30:00	2004-05-09 19:30:00	2006-09-01 08:00:00	2016-08-07 17:30:00	1900-08-10 12:00:00	sssss	84	2012-06-28 18:45:00	2016-08-07 17:30:00	2000-08-02 18:30:00	2018-06-02 18:30:00	2004-08-17 20:00:00	1900-08-05 12:00:00	sssss	104
6012	2009-07-06 18:45:00	2016-07-20 05:00:00	2011-06-07 20:45:00	2012-02-04 15:30:00	2021-02-15 04:30:00	1900-07-08 12:00:00	sssww	90	2016-07-20 05:00:00	2009-02-15 03:45:00	2011-01-13 09:15:00	2010-01-16 12:00:00	2014-02-26 14:45:00	1900-05-09 12:00:00	swwww	138
6013	2013-06-22 13:45:00	2020-06-26 15:30:00	2019-08-07 01:15:00	2021-07-04 15:30:00	2004-06-20 14:00:00	1900-07-21	sssss	64	2002-09-08 03:00:00	2019-08-07 01:15:00	1998-11-14 15:30:00	2009-07-02 15:30:00	2016-05-21 12:00:00	1900-07-13	sswss	88
7001	1994-08-04 02:15:00	2019-08-01 02:15:00	1986-08-14 07:15:00	2016-07-20 07:45:00	2005-08-31 22:30:00	1900-09-17	sssss	86	2014-08-11 07:45:00	2014-11-14 18:15:00	2005-08-31 22:30:00	1980-07-26 04:30:00	2019-08-01 02:15:00	1900-09-09 12:00:00	swsss	96
7002	1990-06-07 03:30:00	1980-07-26 09:00:00	2011-07-07 03:15:00	2005-09-01 03:15:00	2006-07-03 10:00:00	1900-09-21	sssss	89	1990-06-07 03:30:00	2014-08-17 21:30:00	1980-07-26 09:00:00	2016-01-26 16:30:00	1958-09-07 02:00:00	1900-09-18	sssws	97
7003	2004-08-19 11:30:00	2009-07-24 14:45:00	2015-09-02 01:15:00	2002-07-30 18:45:00	2014-08-11 03:30:00	1900-08-26	sssss	68	2004-08-19 11:30:00	2014-08-11 07:00:00	2004-10-17 16:45:00	2009-11-01 23:15:00	1997-07-01 10:30:00	1900-09-02	sswws	73
7004	2006-08-01 21:45:00	2000-08-28 03:45:00	2011-07-16 16:45:00	1990-06-07 01:30:00	1981-09-20 08:15:00	1900-08-12	sssss	78	2006-08-01 21:45:00	1981-09-20 13:15:00	1981-10-03 03:30:00	1990-06-07 01:30:00	1990-10-28 19:30:00	1900-08-12 12:00:00	sswsw	97
7005	1985-07-27 17:15:00	1999-06-28 16:45:00	1986-03-04 15:15:00	1983-05-07 19:00:00	1989-09-23 06:15:00	1900-08-11 12:00:00	sswss	84	2004-08-19 03:00:00	1985-12-01 08:00:00	2014-08-11 04:45:00	1984-09-23 18:30:00	1985-07-27 17:15:00	1900-09-03	swsss	84
7008	2008-08-03 21:45:00	2006-08-01 16:30:00	2009-07-06 23:15:00	2007-08-18 18:30:00	2004-12-14 20:15:00	1900-08-07	ssssw	76	2006-08-01 16:30:00	2008-08-03 21:45:00	2009-07-06 23:15:00	2007-08-18 18:30:00	1997-08-13 20:00:00	1900-08-10	sssss	79
7009	2019-08-07 02:15:00	2004-10-17 13:30:00	1999-06-28 18:30:00	2008-08-21 14:15:00	1999-11-28 19:45:00	1900-08-20 12:00:00	swssw	73	2004-10-17 13:30:00	2014-08-11 05:30:00	2002-11-16 13:00:00	2009-09-04 06:00:00	2020-12-08 04:15:00	1900-08-10 12:00:00	wswsw	97
7010	2011-07-16 20:45:00	2021-07-27 19:15:00	2009-07-14 22:45:00	2020-06-06 04:30:00	2014-08-17 20:15:00	1900-07-21 12:00:00	sssss	72	2011-07-16 20:45:00	2005-06-13 07:00:00	2021-07-27 19:15:00	2014-08-11 05:45:00	2014-10-08 04:15:00	1900-07-15	ssssw	84
7011	2020-12-31 08:15:00	2016-01-10 05:15:00	2013-06-23 19:30:00	2012-08-25 06:30:00	2014-08-11 02:15:00	1900-08-11	wwsss	109	2014-08-11 08:15:00	2017-06-07 01:30:00	2020-12-08 02:30:00	2016-01-10 05:15:00	2014-10-07 20:00:00	1900-08-26	sswww	109
7012	2015-09-01 21:15:00	2019-04-03 11:00:00	2017-06-07 00:15:00	2020-12-08 02:15:00	2021-11-01 06:30:00	1900-08-18	swsww	99	2017-06-07 03:00:00	2020-12-08 03:45:00	2019-04-03 11:00:00	2015-09-01 22:45:00	2016-08-03 15:45:00	1900-10-11 12:00:00	swwss	88
8002	2021-10-31 17:15:00	1987-09-24 21:45:00	1988-08-12 20:45:00	1989-09-20 08:00:00	1989-12-24 15:45:00	1900-09-27 12:00:00	wsssw	56	2019-12-23 03:45:00	2012-08-05 23:45:00	2019-07-24 10:00:00	1999-09-08 21:15:00	2015-07-17 09:45:00	1900-10-03	wssss	57
8004	2011-07-09 19:15:00	2004-08-04 08:00:00	1980-06-06 19:15:00	1989-01-13 21:30:00	1993-10-01 10:30:00	1900-09-12 12:00:00	sssww	91	1980-06-06 19:15:00	1990-10-28 19:45:00	2015-07-17 10:30:00	2000-10-28 22:45:00	1989-01-13 21:30:00	1900-09-19 12:00:00	swsww	87
8005	2019-12-10 16:45:00	2011-08-10 16:30:00	2004-10-21 13:45:00	2005-10-30 20:45:00	2016-12-23 19:30:00	1900-10-22	wswww	102	2003-11-29 17:45:00	2019-12-10 16:45:00	2019-07-24 14:15:00	1990-02-05 10:15:00	2001-10-31 04:15:00	1900-09-18	wwsww	124
8006	2006-09-15 03:15:00	1982-08-07 03:15:00	1978-08-05 00:45:00	1980-06-06 22:15:00	1992-08-30 18:00:00	1900-08-31 12:00:00	sssss	83	1982-08-07 03:15:00	1980-06-06 22:15:00	1982-10-04 23:30:00	1975-11-16 09:45:00	1958-07-28 23:15:00	1900-09-07	sswws	83
8007	2000-08-02 20:00:00	2001-01-22 20:30:00	2004-10-19 16:30:00	1991-09-21 17:00:00	2001-10-01 01:45:00	1900-09-21	swwsw	106	2021-11-09 13:15:00	1998-10-16 15:45:00	2009-07-02 19:30:00	2001-10-01 01:45:00	2011-10-29 18:15:00	1900-08-21 12:00:00	wwsww	124
8008	2005-01-01 14:15:00	2009-08-20 10:00:00	2018-09-18 00:30:00	2007-06-22 17:15:00	2015-06-01 21:15:00	1900-09-07 12:00:00	wssss	97	1993-01-17 09:00:00	2002-07-30 18:45:00	2009-08-20 10:00:00	2005-11-07 23:00:00	2005-01-01 14:15:00	1900-08-24	wssww	110
8009	1981-09-18 10:15:00	2016-06-07 19:00:00	1990-06-07 01:30:00	2005-09-01 00:15:00	1998-08-10 22:00:00	1900-08-30	sssss	103	1981-09-20 10:30:00	1958-08-11 02:45:00	1985-12-01 07:15:00	1990-06-07 01:30:00	1963-03-05 22:15:00	1900-08-10 12:00:00	sswsw	115
8010	1989-01-13 22:00:00	1992-10-01 08:00:00	2012-10-12 16:15:00	2002-11-15 12:30:00	1988-08-13 01:00:00	1900-09-03	wwwws	76	1990-06-07 03:30:00	1989-01-13 22:00:00	1993-01-16 21:15:00	2015-12-05 05:45:00	2007-06-21 18:45:00	1900-09-01	swwws	109
8011	2016-06-24 16:45:00	2001-06-27 19:30:00	2002-08-06 13:45:00	2005-06-03 20:45:00	1999-07-10 15:45:00	1900-08-08	sssss	46	2002-08-06 13:45:00	2004-08-19 02:00:00	2014-08-11 06:00:00	2001-06-27 19:30:00	1999-07-10 15:45:00	1900-08-11 12:00:00	sssss	62
8013	2015-07-17 08:30:00	2005-08-24 07:15:00	2015-10-24 09:00:00	2020-07-27 17:45:00	2012-08-05 22:30:00	1900-08-26	sswss	51	2015-12-30 12:15:00	2016-12-23 19:30:00	2019-07-24 08:45:00	2015-07-17 08:30:00	2002-07-30 20:30:00	1900-08-29 12:00:00	wwsss	101
9001	2009-07-06 23:00:00	1977-08-26 14:30:00	2013-10-10 01:30:00	1992-08-30 17:00:00	2007-06-24 00:30:00	1900-08-26	sswss	78	1962-01-05 20:15:00	1970-08-16 14:00:00	2009-07-06 23:00:00	1972-05-27 16:15:00	1977-08-26 14:30:00	1900-08-26	wssss	79
9002	2009-07-07 04:00:00	1984-09-24 00:30:00	1977-08-26 19:15:00	1967-10-04 13:45:00	1972-05-27 23:30:00	1900-08-21	sssws	72	2009-11-01 21:45:00	1960-08-25 21:45:00	1972-05-27 23:30:00	1970-08-16 18:30:00	1960-11-04 07:30:00	1900-08-26	wsssw	76
9003	1996-01-01 09:00:00	2021-07-11 18:45:00	1991-11-04 04:45:00	2002-07-30 23:30:00	2004-08-18 16:15:00	1900-08-15	wswss	96	2009-11-01 22:30:00	2021-07-11 19:00:00	2017-10-22 08:30:00	2014-08-11 00:45:00	2005-11-25 11:15:00	1900-08-26 12:00:00	wswsw	95
9004	2002-07-30 22:15:00	2010-09-23 04:30:00	2016-07-20 20:00:00	2000-04-23 15:15:00	1993-09-11 14:30:00	1900-08-14	sssws	81	2002-07-30 22:15:00	2016-07-20 20:00:00	1998-04-04 09:00:00	2002-11-15 12:45:00	2007-11-22 12:00:00	1900-09-07	sswww	88
9005	2009-07-06 19:00:00	2010-04-01 09:15:00	2015-07-17 10:00:00	2013-11-02 19:30:00	2004-08-18 13:15:00	1900-08-07	swsws	89	2009-07-06 19:00:00	2004-08-18 13:15:00	2021-08-10 19:45:00	1995-09-07 23:00:00	2001-08-19 22:45:00	1900-09-07	sssss	78
9006	2021-05-10 17:45:00	2010-09-23 05:00:00	2002-07-19 10:15:00	2020-07-27 20:00:00	2014-08-10 23:15:00	1900-08-19 12:00:00	sssss	87	2010-09-23 09:00:00	1995-09-12 09:00:00	2014-08-10 23:45:00	2009-09-04 00:30:00	2014-10-08 03:30:00	1900-09-08	ssssw	82
9010	2009-07-06 21:30:00	2012-10-12 15:30:00	2015-07-17 14:15:00	2021-05-19 00:45:00	2013-10-09 23:30:00	1900-07-19	swssw	71	2009-07-06 21:45:00	2012-10-12 15:30:00	2015-12-30 12:15:00	2009-11-02 00:45:00	2021-08-07 07:30:00	1900-08-07	swwws	69
10002	2014-01-19 18:00:00	1998-11-26 15:15:00	1995-09-12 05:30:00	2016-01-08 07:00:00	2009-11-02 05:15:00	1900-08-11	wwsww	118	2016-01-08 07:00:00	1991-10-20 09:00:00	2010-12-11 06:15:00	1996-09-26 09:00:00	2009-11-02 05:15:00	1900-09-19 12:00:00	wwwsw	123
10003	2020-10-22 02:45:00	2017-08-18 18:00:00	1999-12-25 00:30:00	1985-08-30 09:45:00	1987-10-21 08:15:00	1900-10-21	wswsw	96	2016-01-08 00:30:00	1996-02-10 09:00:00	2020-10-22 06:15:00	2009-11-01 20:15:00	2008-04-08 15:45:00	1900-10-07 12:00:00	wwwww	110
11001	2003-12-24 20:00:00	2007-06-24 07:15:00	2001-10-21 02:15:00	2012-10-12 19:15:00	2016-01-08 00:30:00	1900-08-09	wswww	75	2016-01-08 04:00:00	2012-09-25 19:45:00	2009-10-22 18:15:00	2003-12-24 20:00:00	2002-10-23 07:00:00	1900-08-12	wswww	94
11002	1973-12-03 09:45:00	1982-08-07 10:45:00	1999-07-11 00:30:00	1986-03-04 22:00:00	1979-01-15 00:15:00	1900-08-06 12:00:00	wssww	97	1973-12-03 09:45:00	1981-12-31 01:30:00	1979-01-15 00:15:00	1999-07-11 00:30:00	1984-09-24 01:30:00	1900-08-19 12:00:00	wwwwss	109
11003	1982-08-07 06:15:00	1999-07-10 19:15:00	1995-12-30 19:15:00	1985-01-27 18:15:00	1984-09-23 21:45:00	1900-08-06 12:00:00	sswws	80	1995-12-30 19:15:00	1982-08-07 06:15:00	1999-07-10 19:15:00	2004-08-19 03:30:00	1985-01-27 18:15:00	1900-09-04	wsssw	88
11004	1990-11-18 03:00:00	2002-09-07 17:30:00	2013-11-03 06:45:00	2020-10-22 06:30:00	2010-11-19 06:15:00	1900-09-09	wswww	90	1995-09-08 09:00:00	2009-11-02 00:15:00	2016-01-08 00:30:00	1990-11-18 03:00:00	2015-07-07 16:45:00	1900-09-04	swwws	98
11006	2007-06-21 19:00:00	2011-06-21 04:45:00	2004-01-01 09:00:00	1999-07-10 14:45:00	2019-07-10 19:45:00	1900-07-22 12:00:00	sswss	84	2009-11-02 01:15:00	2021-02-21 00:30:00	1999-07-10 14:45:00	2007-06-22 19:00:00	2001-08-19 21:30:00	1900-08-04	wwsss	89
12001	2007-10-28 12:30:00	1989-09-20 17:45:00	2019-07-24 20:00:00	1993-10-01 13:00:00	1990-01-10 18:45:00	1900-09-18	wssww	88	2015-12-30 14:30:00	1981-10-03 01:30:00	1989-09-20 17:45:00	2002-07-31 03:45:00	1990-01-10 18:45:00	1900-09-24	swwssw	93
12002	1982-08-07 04:00:00	1993-10-01 15:30:00	1990-01-10 20:15:00	1989-09-20 19:30:00	2000-01-31 04:00:00	1900-09-10 12:00:00	swwsw	99	1982-09-25 02:30:00	1993-10-01 15:30:00	2002-07-31 05:30:00	2014-10-06 17:45:00	1992-02-27 20:45:00	1900-09-22 12:00:00	swsww	107
12003	1991-09-21 23:00:00	1990-09-07 00:15:00	1999-09-09 01:00:00	2020-07-27 21:15:00	2019-07-24 13:45:00	1900-08-25 12:00:00	sssss	90	1982-08-06 20:15:00	2021-02-20 20:00:00	2018-12-18 12:45:00	1990-09-07 00:15:00	2014-10-06 12:15:00	1900-09-08	swwsw	103
12004	2000-07-29 16:00:00	2020-08-12 06:00:00	2004-08-04 04:30:00	1996-07-23 16:30:00	1999-05-12 14:00:00	1900-08-04	sssss	101	1995-09-09 22:15:00	1993-01-15 05:15:00	1998-06-07 14:00:00	1996-01-08 23:15:00	2002-07-31 00:30:00	1900-07-17	swsws	113
12005	2001-07-03 21:15:00	2018-06-02 16:15:00	2007-06-08 00:30:00	2020-08-12 06:45:00	2021-08-06 10:30:00	1900-08-08	sssss	66	1999-09-20 23:15:00	2004-08-18 09:00:00	2007-06-08 00:30:00	2018-06-02 16:15:00	2001-07-03 21:15:00	1900-08-06	sssss	80
12006	2006-02-03 13:15:00	2001-10-14 21:00:00	2000-08-08 16:15:00	1991-06-30 18:15:00	1993-01-01 12:15:00	1900-07-24	wwssw	120	2001-10-14 21:00:00	2021-02-24 15:15:00	1993-01-15 09:00:00	1990-10-28 21:30:00	2015-07-17 09:00:00	1900-07-11	wwwws	123
12007	2019-07-24 09:00:00	1999-09-08 19:30:00	1984-09-23 14:30:00	1991-09-21 17:00:00	1990-09-06 19:00:00	1900-09-01	sssss	99	2019-07-24 09:00:00	2015-07-17 07:30:00	1999-09-08 19:30:00	1988-10-07 13:45:00	2020-06-17 02:30:00	1900-09-10	sssws	112
12008	2000-07-30 16:45:00	2015-07-17 08:15:00	2003-04-22 05:00:00	1988-10-19 08:30:00	2011-10-25 12:15:00	1900-08-25 12:00:00	sswww	66	1987-07-11 17:30:00	2015-12-30 11:45:00	2015-07-07 18:15:00	1988-10-19 08:30:00	2012-08-16	1900-10-02 12:00:00	swsws	65
12009	1991-06-23 16:15:00	2004-08-18 07:15:00	2015-07-07 16:00:00	2012-08-27 15:15:00	2011-07-10 11:30:00	1900-09-11	sssss	58	2000-07-30 15:00:00	2015-07-07 16:45:00	2006-10-19 15:30:00	1991-06-23 16:15:00	1995-09-07 20:15:00	1900-10-04	sswss	62
13001	1987-07-11 17:00:00	1991-06-23 20:00:00	2005-05-03 16:00:00	2019-08-09 16:45:00	2021-05-12 09:15:00	1900-09-15 12:00:00	sssss	106	2012-12-23 04:00:00	2010-11-19 10:15:00	1979-10-04 15:30:00	2009-11-01 23:30:00	2020-10-04 03:30:00	1900-09-05 12:00:00	wwwww	110
13002	2019-07-10 18:15:00	1993-07-17 14:30:00	1987-10-18 13:00:00	1987-07-11 19:00:00	2017-07-26 17:15:00	1900-08-28	sswss	94	1985-12-01 05:15:00	2019-07-10 18:15:00	1988-04-18 23:30:00	1984-11-10 03:30:00	1988-10-26 04:30:00	1900-08-04 12:00:00	wswww	103
13004	2021-09-10 18:00:00	1998-06-26 20:15:00	2000-06-22 18:30:00	2010-09-07 16:00:00	2007-10-28 05:45:00	1900-08-23	ssssw	57	2015-07-17 06:30:00	2021-09-10 18:00:00	2005-06-04 14:00:00	2005-10-30 15:00:00	2004-08-19 12:15:00	1900-09-09	sssws	77
13005	2002-10-22 08:45:00	1998-10-16 14:15:00	2019-08-09 16:30:00	1994-01-03 20:45:00	2012-11-22 14:15:00	1900-09-18 12:00:00	wwsww	110	2002-10-22 08:45:00	2020-10-22 04:30:00	2001-02-28 16:00:00	2004-10-21 11:00:00	2019-08-09 17:00:00	1900-06-13	wwwws	126
13007	1992-08-22 23:45:00	1997-11-18 08:45:00	2021-08-06 12:00:00	2010-09-07 18:30:00	2012-08-27 16:15:00	1900-09-07	swsss	95	2015-07-17 09:15:00	1997-11-18 08:45:00	2018-11-10 04:45:00	2010-10-01 17:00:00	2000-09-20 03:30:00	1900-09-20	swwws	98
13008	2020-08-12 10:30:00	2015-07-17 10:00:00	2017-09-28 07:30:00	2011-10-25 13:45:00	2009-04-08 09:15:00	1900-09-16	sssww	68	2015-07-17 10:00:00	2020-08-12 10:30:00	2012-08-27 16:45:00	1988-10-19 10:00:00	2017-09-28 07:30:00	1900-09-21	sssws	87
13009	1992-08-22 21:45:00	2009-07-06 14:00:00	1994-10-20 10:15:00	2021-08-06 09:45:00	1990-06-06 22:15:00	1900-08-30	sswss	62	2015-07-17 07:30:00	1985-08-14 21:00:00	2009-07-06 14:00:00	2012-08-27 14:30:00	1992-08-22 21:45:00	1900-09-10	sssss	78
13010	2007-03-07 05:30:00	2020-08-12 06:30:00	2011-08-06 23:30:00	2019-08-09 15:45:00	2005-01-08 08:00:00	1900-08-15 12:00:00	wsssw	84	2019-08-09 16:15:00	2005-01-08 08:00:00	2011-08-06 23:45:00	2007-03-07 05:30:00	2020-10-22 04:30:00	1900-08-16 12:00:00	swsww	125
13012	1999-12-22 12:15:00	2015-12-30 08:15:00	2002-11-03 01:45:00	1997-11-18 14:15:00	2018-11-28 23:00:00	1900-08-31 12:00:00	wwwww	73	2015-12-30 13:15:00	2018-11-28 23:00:00	2015-07-17 15:00:00	2002-11-03 01:45:00	1997-11-18 14:15:00	1900-09-08	wwsww	124
13017	2011-07-06 10:30:00	2019-08-09 14:30:00	2007-01-11 02:45:00	2005-01-08 07:00:00	2020-08-12 05:45:00	1900-09-02	sswws	94	2011-07-06 10:30:00	2020-10-03 19:00:00	2009-09-03 19:45:00	2009-11-01 16:15:00	2007-01-11 02:45:00	1900-08-09	swsww	123
14001	2002-07-31 01:30:00	2008-08-10 02:30:00	2000-10-09 18:00:00	1999-12-24 21:45:00	1995-11-15 10:30:00	1900-07-17 12:00:00	sswww	93	2009-07-06 11:30:00	2008-08-10 02:30:00	2002-07-31 01:30:00	2013-05-20 16:30:00	2009-11-01 15:30:00	1900-07-12 12:00:00	ssssw	103
14002	2021-07-28 00:15:00	1991-11-18 20:30:00	2002-07-30 23:15:00	2004-08-16 17:00:00	2008-08-13	1900-08-15 12:00:00	swsss	77	2021-07-28 00:15:00	2004-08-16 17:00:00	2019-08-10 22:45:00	2009-09-04 08:30:00	2002-07-30 23:15:00	1900-08-17	sssss	109
14005	1993-10-07 12:30:00	1998-04-03 11:45:00	1992-03-31 16:15:00	2009-11-01 17:45:00	2002-12-01 11:15:00	1900-10-11 12:00:00	wwwww	122	1993-10-07 12:30:00	1993-01-15 17:00:00	1992-04-01 04:15:00	2008-08-13 19:00:00	2012-12-21 04:15:00	1900-10-06	wwwsw	124
14009	2009-07-06 10:30:00	2016-08-03 07:00:00	2005-06-04 16:00:00	2005-10-24 13:00:00	2001-10-08 00:30:00	1900-08-17	sssww	103	2000-04-26 21:15:00	2005-10-24 13:00:00	1999-09-23 05:00:00	1993-01-15 09:45:00	2005-06-04 16:00:00	1900-08-26 12:00:00	wwsws	116
15003	2002-07-30 04:30:00	2010-09-29 16:15:00	2009-08-20 14:15:00	2005-11-11 12:00:00	1997-11-18 06:30:00	1900-09-21 12:00:00	sssww	92	2005-11-11 12:00:00	1993-01-17 06:15:00	1997-02-17 23:30:00	2003-11-29 18:30:00	2002-07-30 04:30:00	1900-09-25 12:00:00	wwwws	105
15006	1962-09-30 10:30:00	2014-10-06 16:30:00	1952-11-07 00:45:00	1981-09-18 12:30:00	2000-09-20 08:45:00	1900-10-05	swwss	97	1993-01-17 13:30:00	2003-11-29 19:15:00	1990-01-10 15:15:00	2005-11-11 14:30:00	2006-12-13 18:45:00	1900-10-03	wwwww	94
15007	2009-08-20 11:15:00	1997-11-18 03:15:00	1991-12-22 10:45:00	2004-10-21 11:00:00	2005-11-11 08:30:00	1900-08-23	swwww	102	2004-08-11 10:30:00	1993-01-16 23:00:00	2002-07-30 19:00:00	2015-07-17 07:30:00	2004-10-21 11:00:00	1900-09-20 12:00:00	swssw	119
15010	2021-08-06 13:15:00	2007-10-28 07:00:00	2014-10-06 13:00:00	2009-06-17 14:45:00	2013-12-05 11:30:00	1900-09-21 12:00:00	swwsw	57	2020-08-12 06:15:00	2021-08-06 13:15:00	2021-10-31 16:30:00	2015-07-17 08:00:00	2007-10-28 07:00:00	1900-09-23 12:00:00	sswsw	65
15011	2007-06-22 16:15:00	2015-11-08 15:00:00	2009-07-03 20:15:00	1994-08-23 10:15:00	2012-08-17 09:45:00	1900-07-23 12:00:00	swsss	84	2002-07-30 17:00:00	1997-02-19 16:45:00	2007-06-22 16:15:00	2004-08-09 11:45:00	2010-10-29 20:00:00	1900-08-23	swssw	109
15012	2020-11-05 19:45:00	2000-02-27 06:45:00	2001-02-11 14:30:00	2015-12-30 04:00:00	1997-02-17 19:45:00	1900-10-16	wwwww	116	2006-11-20 01:00:00	1995-10-26 08:00:00	2001-10-15 19:00:00	2000-01-30 21:45:00	2008-03-08 13:30:00	1900-10-25	wwwww	121
15013	2006-09-01 12:30:00	2015-06-01 22:30:00	2021-03-10 01:15:00	1994-10-20 08:00:00	1993-10-01 12:15:00	1900-09-13	sswww	92	1993-10-01 12:15:00	2015-06-01 22:30:00	2006-11-19 22:30:00	2020-02-08 22:00:00	1993-01-15 09:30:00	1900-09-28	wswww	94
15014	2006-08-19 15:45:00	2009-06-13 22:00:00	2014-08-09 00:30:00	2017-06-21 21:45:00	2015-08-10 16:00:00	1900-08-13	sssss	71	2005-06-19 05:45:00	2015-08-10 16:15:00	2016-07-20 10:30:00	2012-08-15 22:00:00	2019-07-24 07:00:00	1900-09-03 12:00:00	sssss	73
15015	2002-10-22 01:00:00	2006-09-01 08:00:00	2018-06-02 19:30:00	2016-07-20 10:45:00	2014-10-06 08:00:00	1900-09-01 12:00:00	wsssw	81	2001-12-03 23:15:00	2006-09-01 08:15:00	2006-11-19 21:00:00	2005-06-19 06:00:00	1999-09-20 18:00:00	1900-09-15 12:00:00	wswss	95
15016	2011-12-08 14:15:00	1993-01-15 19:00:00	1998-11-10 03:15:00	2015-11-11 17:30:00	1994-01-27 11:45:00	1900-07-21	wwwww	136	1993-01-15 19:00:00	2018-09-19 10:45:00	2008-01-08 20:45:00	2011-12-08 14:15:00	2015-12-30 08:45:00	1900-04-15	wswww	146
15021	2013-12-31 10:45:00	2000-09-20 14:00:00	2011-01-15 13:30:00	2014-11-07 11:45:00	2018-12-18 21:00:00	1900-09-04	wswww	118	2016-01-07 19:30:00	2013-12-31 10:45:00	2004-08-12 02:00:00	1999-02-05 11:00:00	2012-12-23 03:45:00	1900-04-23	wwsww	141
15023	2020-08-11 18:45:00	1996-01-01 19:45:00	2002-08-06 21:30:00	2007-07-01 19:00:00	2010-12-10 15:30:00	1900-09-01	swssw	89	2004-08-11 08:15:00	1996-01-01 19:45:00	2010-12-10 15:30:00	1997-02-19 15:15:00	2001-10-20 16:45:00	1900-08-05 12:00:00	swsws	112
15024	1994-08-03 21:30:00	1997-11-16 16:00:00	1992-02-12 13:45:00	2002-07-30 15:30:00	2011-09-21 12:15:00	1900-08-07 12:00:00	swwss	73	2007-07-14 01:30:00	2004-08-18 17:15:00	1992-02-12 13:45:00	2002-07-30 15:30:00	1997-05-18 16:00:00	1900-09-04	sswss	98
15025	2007-10-28 06:45:00	2005-06-19 09:30:00	2020-07-27 18:30:00	1995-10-03 03:00:00	2018-06-16 22:30:00	1900-08-19	wssws	79	2014-10-06 12:15:00	1995-10-03 03:00:00	2004-12-23 08:30:00	2007-11-28 20:00:00	2004-05-09 20:45:00	1900-09-05 12:00:00	wwwws	94
15028	2013-05-03 17:45:00	2021-05-12 19:00:00	2015-07-17 05:45:00	2020-02-08 22:00:00	2008-12-12 21:30:00	1900-07-24	sssww	122	2004-08-11 11:15:00	1993-01-15 10:30:00	2005-01-08 09:30:00	2002-02-01 13:15:00	1999-12-25 01:30:00	1900-07-25 12:00:00	swwww	130
15030	1992-08-31 10:45:00	2020-10-04	2002-07-31 04:30:00	2001-01-22 18:15:00	2006-10-26 07:30:00	1900-08-29 12:00:00	swsww	119	2016-01-07 15:45:00	2020-10-04	1992-08-31 10:45:00	1994-01-03 21:45:00	1993-01-15 12:00:00	1900-06-23	wwsww	125
15034	2009-07-02 19:30:00	2014-07-06 22:30:00	2005-09-01 00:15:00	2019-07-24 07:30:00	2018-09-16 06:00:00	1900-09-05	sssss	69	2002-07-30 20:00:00	2018-09-16 06:00:00	2010-10-29 21:15:00	2011-10-29 18:00:00	2015-12-22 09:15:00	1900-09-21	sswww	69
15039	2014-07-06 21:00:00	2018-06-03 15:30:00	2002-08-06 20:00:00	2021-08-06 12:00:00	2005-06-19 06:00:00	1900-08-06	sssss	63	2019-07-24 07:15:00	2014-07-06 21:00:00	2015-08-10 17:00:00	2004-08-06 03:00:00	2005-06-19 06:00:00	1900-08-28 12:00:00	sssss	82
15046	2019-07-11 21:30:00	2011-07-16 16:15:00	2012-08-21 18:15:00	2015-07-17 04:30:00	2010-07-14 23:45:00	1900-07-17	sssss	88	2015-12-04 23:30:00	2019-07-11 21:30:00	2011-01-15 13:45:00	2013-01-29 00:30:00	2020-02-15 18:30:00	1900-07-14	wswww	121
16001	2004-09-13 03:30:00	2012-08-04 22:00:00	2020-09-30 15:45:00	2019-02-08 11:15:00	2015-07-17 06:45:00	1900-08-04	sssws	77	1991-01-01 19:45:00	2005-06-19 09:30:00	2004-09-13 03:30:00	1992-05-12 01:30:00	2012-08-04 22:00:00	1900-08-05	wssss	77
16003	2001-07-04 01:15:00	2012-08-04 18:15:00	1992-08-03 02:45:00	1994-08-23 07:45:00	2014-08-02 20:30:00	1900-08-03	sssss	91	2012-08-04 18:30:00	2001-07-04 01:15:00	2015-11-08 15:00:00	2002-02-01 09:15:00	2015-07-17 03:15:00	1900-08-23	sswws	91
16004	1998-10-21 00:15:00	2015-07-17 08:45:00	2008-12-13 01:45:00	1993-03-29 22:15:00	2002-10-12 05:45:00	1900-08-20	wswww	86	2020-08-12 02:15:00	1999-11-28 11:30:00	1998-10-21 00:15:00	2000-10-29 13:00:00	2006-12-13 19:30:00	1900-08-15	swwww	121
16007	2001-09-30 23:45:00	2009-07-28 23:30:00	1994-10-23 04:45:00	2015-07-17 05:15:00	2008-08-09 22:00:00	1900-09-13 12:00:00	sswss	93	2002-09-10 00:15:00	2020-08-12 03:45:00	2008-08-09 22:00:00	2001-09-30 23:45:00	2016-01-26 11:15:00	1900-08-11 12:00:00	ssssw	112
17001	2016-04-01 19:15:00	2002-07-30 18:00:00	2004-08-06 03:30:00	2005-09-23 08:45:00	2007-06-20 10:15:00	1900-08-02	wssss	98	2013-04-17 15:15:00	2011-02-03 20:45:00	2011-10-17 15:45:00	2006-12-13 19:45:00	1998-10-21 02:45:00	1900-08-10	wwwww	114
17003	2001-07-04 01:00:00	2018-06-02 17:15:00	2011-07-06 06:15:00	1999-05-12 19:45:00	2021-07-03 18:00:00	1900-07-19	sssss	43	2001-07-04 01:00:00	1999-05-12 19:45:00	2002-08-07 03:00:00	2018-06-02 17:15:00	2005-06-30 18:30:00	1900-07-19	sssss	53
17004	2011-02-07 12:00:00	2010-07-21 05:00:00	2008-08-10 01:00:00	2012-01-04 23:30:00	2012-10-17 13:45:00	1900-07-16	wssww	86	2011-02-07 12:30:00	1999-12-03 10:30:00	2006-03-21 12:30:00	2012-01-04 23:30:00	1999-09-29 06:15:00	1900-07-20	wwwws	113
17005	2019-08-04 17:15:00	1997-08-13 19:00:00	2008-08-01 10:00:00	1993-07-16 17:00:00	2020-08-12 05:00:00	1900-08-01	sssss	66	2020-08-12 05:00:00	1997-08-13 19:00:00	2000-10-29 05:30:00	1999-12-03 07:15:00	2008-08-01 10:00:00	1900-08-10	sswws	106
17008	2020-08-12 01:30:00	2008-04-28 10:30:00	1998-03-29 22:00:00	2015-07-17 06:45:00	1997-02-27 16:45:00	1900-07-29	swwsw	96	2006-12-13 17:00:00	2015-12-05 08:15:00	1998-11-22 03:00:00	2008-01-25 03:15:00	1998-02-11 09:00:00	1900-09-10	wwwww	123
17015	1992-11-01 03:45:00	2007-06-23 17:45:00	1997-09-16 13:00:00	2003-05-24 17:00:00	1998-07-06 22:15:00	1900-07-26	wssss	82	1998-07-06 22:15:00	1993-01-23 20:45:00	2002-09-10 01:30:00	1997-09-16 13:00:00	2000-09-22 10:00:00	1900-09-16	swsss	93
17018	2000-12-12 07:00:00	2014-10-28 11:00:00	2013-10-22 03:15:00	2019-08-09 14:30:00	2002-09-08 12:00:00	1900-10-22	wwwss	125	2000-12-12 07:00:00	2009-11-01 15:30:00	2013-10-22 03:30:00	2014-10-28 11:00:00	2002-09-08 12:00:00	1900-10-22	wwwwss	126
18001	2003-03-02 07:15:00	1997-05-04 11:45:00	2015-07-17 05:45:00	2011-09-25 20:00:00	2015-10-28 16:45:00	1900-08-10	wsssw	88	2003-03-02 07:15:00	2015-07-17 05:45:00	1994-12-28 18:45:00	2004-10-21 08:15:00	2015-10-28 16:45:00	1900-09-08	wswww	97
18002	2002-07-30 20:00:00	2004-08-09 18:00:00	2009-09-10 09:30:00	1992-10-01 08:45:00	2020-08-04 18:30:00	1900-09-10	sssws	90	2004-08-09 18:00:00	2002-07-30 20:45:00	2020-08-04 18:30:00	2012-08-29 18:00:00	2009-11-19 08:45:00	1900-08-30	ssssw	116
18003	2001-07-04 02:30:00	2004-08-18 18:30:00	1992-08-03 04:00:00	2019-08-09 14:00:00	2016-09-13 04:30:00	1900-08-09	sssss	82	2004-08-18 18:45:00	2001-07-04 02:30:00	2010-09-09 12:15:00	2005-11-11 06:15:00	2008-08-01 11:00:00	1900-08-15	sssws	97
18005	2011-09-25 21:00:00	1998-09-01 15:30:00	1998-12-08 05:00:00	2012-08-29 15:45:00	2008-08-01 12:00:00	1900-07-17	sswss	72	2011-09-25 21:00:00	2012-08-29 15:45:00	2006-06-20 22:15:00	1998-09-01 15:30:00	2016-04-01 19:30:00	1900-08-10	ssssw	88
18008	2016-01-29 06:45:00	2020-01-07 20:15:00	2021-10-26 22:30:00	2008-12-19 16:45:00	1993-01-17 02:45:00	1900-10-05	wwwww	137	1993-01-17 03:00:00	2016-01-29 06:45:00	2000-06-13 06:15:00	2013-05-09 08:45:00	2011-12-08 10:00:00	1900-06-14	wwssw	133
18010	2018-09-18 23:30:00	2017-09-25 09:00:00	2018-10-10 10:00:00	2019-10-07 21:30:00	2012-12-28 12:00:00	1900-09-16	sswww	100	2018-10-10 10:00:00	2018-09-18 23:30:00	2017-09-25 09:00:00	2008-02-21 22:45:00	2006-09-07 11:00:00	1900-09-07	wssws	106
18011	2012-07-18 10:15:00	2004-10-21 08:30:00	2002-07-30 19:00:00	2018-01-03 16:45:00	1993-01-15 09:30:00	1900-08-05	swsww	84	2004-08-18 19:30:00	2008-08-01 11:45:00	2002-07-30 19:00:00	2001-07-04 03:45:00	2016-03-01 02:15:00	1900-08-04	ssssw	102
18013	1998-07-31 22:30:00	1996-03-12 00:45:00	2011-02-04 20:30:00	2004-10-25 01:00:00	2020-08-12 07:45:00	1900-08-13	swwws	70	2011-02-04 20:30:00	2004-10-25 01:00:00	2020-08-12 07:45:00	1999-11-28 11:45:00	1993-01-23 21:15:00	1900-09-24	wwsww	95
18014	2009-03-10 12:45:00	2004-01-11 06:15:00	2013-12-14 12:45:00	2002-07-30 19:00:00	1996-08-23 18:30:00	1900-07-02 12:00:00	wwwss	108	1993-01-16 12:30:00	2016-01-26 09:30:00	2008-01-05 21:15:00	1995-01-31 05:00:00	2002-07-30 19:00:00	1900-07-28 12:00:00	wwwws	127
18020	2018-09-16 10:30:00	1997-12-10 14:00:00	2019-09-25 09:30:00	2009-07-03 15:15:00	2000-03-04 10:45:00	1900-08-17 12:00:00	swssw	93	2002-07-30 15:00:00	2019-08-09 12:45:00	2006-12-13 11:15:00	1998-10-20 20:15:00	1993-01-09 04:30:00	1900-08-01	sswww	108
18021	2019-02-01 03:45:00	2018-09-16 10:30:00	2005-01-19 11:15:00	2007-03-11 22:15:00	2002-07-30 13:45:00	1900-07-14	wswws	116	2002-07-30 13:45:00	1993-01-09 04:15:00	2012-11-19 06:45:00	2005-06-19 06:15:00	2009-09-08 07:15:00	1900-09-04 12:00:00	swwss	110
18022	2006-09-28 20:30:00	2008-01-07 16:45:00	2018-11-15 17:45:00	2002-12-04 10:30:00	2006-12-13 20:15:00	1900-10-29	swwww	106	2006-12-13 20:15:00	2002-02-07 11:15:00	2008-10-25 16:15:00	2010-04-07 00:45:00	2002-12-04 10:30:00	1900-10-23	wwwww	132
19001	2002-07-30 16:15:00	2000-08-02 18:15:00	2021-07-04 18:30:00	1997-08-13 23:30:00	2010-06-05 22:00:00	1900-07-30	sssss	91	2002-07-30 17:00:00	2008-08-10 01:45:00	1994-03-14 07:30:00	1997-08-13 23:30:00	2018-06-20 02:45:00	1900-08-11	sswss	110
19004	2016-06-07 12:30:00	2009-07-06 14:30:00	2019-06-24 16:15:00	2010-09-23 03:00:00	2012-08-29 14:45:00	1900-07-16	sssss	76	2016-06-07 12:30:00	2006-05-22 22:45:00	2012-08-29 14:45:00	2000-08-20 17:00:00	2010-09-23 03:00:00	1900-07-06	sssss	90
19005	2021-07-04 15:45:00	2000-07-28 18:45:00	2009-06-14 16:45:00	2013-07-23 19:00:00	2002-07-30 13:00:00	1900-07-29	sssss	76	2002-07-30 14:45:00	2021-07-04 15:45:00	2008-08-10	2000-08-02 16:00:00	2009-06-14 16:45:00	1900-08-10	sssss	107
19006	2004-08-11 22:00:00	2000-08-02 17:00:00	2009-07-16 19:30:00	2014-05-25 12:45:00	2007-07-23 21:45:00	1900-07-23	sssss	74	2004-08-11 22:00:00	2011-07-16 19:00:00	2019-06-24 15:30:00	2000-08-02 17:15:00	2021-07-04 16:45:00	1900-07-16	sssss	91
19007	2004-08-09 22:00:00	2012-08-29 17:45:00	2011-07-16 20:45:00	2014-06-04 17:15:00	1993-10-06 04:45:00	1900-07-16	ssssw	73	2012-08-29 17:45:00	2004-08-09 22:00:00	2000-04-26 22:15:00	1993-10-07 17:00:00	2001-02-06 18:45:00	1900-07-16	sswww	113
19010	2011-07-08 13:45:00	2018-07-28 10:00:00	2013-07-27 16:45:00	2016-06-10 04:45:00	2000-07-27 15:00:00	1900-07-28	sssss	42	2021-07-04 17:00:00	2011-07-08 13:45:00	2014-05-25 12:30:00	2020-08-11 22:00:00	2012-08-29 14:00:00	1900-07-26	sssss	62
19012	2000-08-02 17:00:00	2011-07-16 18:15:00	2004-08-11 21:00:00	2007-07-01 12:15:00	2005-03-30 13:45:00	1900-07-03 12:00:00	ssssw	84	2011-07-16 18:15:00	2004-08-11 21:00:00	2019-06-24 14:30:00	2000-08-02 17:15:00	2007-07-01 12:15:00	1900-08-07 12:00:00	sssss	113
19014	2013-07-23 19:30:00	2010-06-05 17:45:00	2016-07-20 08:30:00	2006-07-26 06:15:00	2002-07-30 13:45:00	1900-07-27 12:00:00	sssss	43	2002-07-30 13:45:00	2008-08-10 00:15:00	2013-07-23 19:30:00	2020-08-27 17:30:00	2014-05-25 13:15:00	1900-08-06 12:00:00	sssss	58
19017	2021-07-04 16:15:00	2016-06-25 00:45:00	2006-07-02 14:30:00	2000-08-02 16:30:00	1995-07-14 13:30:00	1900-07-29 12:00:00	sssss	52	2021-07-04 16:15:00	2019-06-24 14:00:00	2000-08-02 16:30:00	2016-06-25 00:45:00	2011-07-08 14:15:00	1900-07-11	sssss	83
19020	1998-09-02 16:45:00	2021-08-09 13:30:00	2019-08-07 18:30:00	2008-08-19 22:00:00	2018-09-19 11:00:00	1900-08-04	sssss	64	1997-08-13 16:30:00	2020-08-04 15:30:00	2003-09-21 23:30:00	1998-09-02 16:45:00	2010-10-30 01:15:00	1900-08-10	ssssw	83
19021	2012-08-05 12:00:00	2013-05-20 18:15:00	2018-06-19 22:30:00	2006-07-02 14:45:00	2008-07-29 21:00:00	1900-07-16	sssss	57	1993-10-07 17:45:00	2000-04-26 20:00:00	2014-12-22 03:30:00	2011-10-17 15:45:00	2014-06-04 16:15:00	1900-08-10	wwwws	90
20001	2020-08-12 02:15:00	2008-04-28 00:15:00	2000-08-28 11:45:00	2021-10-05 17:45:00	2014-06-04 18:15:00	1900-09-03	swsws	106	2020-08-12 02:15:00	1993-10-06 07:00:00	2014-06-04 18:30:00	2021-10-05 19:15:00	2000-10-09 22:00:00	1900-09-23	swsww	87
20002	2011-10-17 17:45:00	2007-07-22 03:30:00	2011-02-07 08:15:00	2015-12-03 21:15:00	2008-01-10 13:00:00	1900-08-01 12:00:00	wswww	88	2011-10-17 17:30:00	2018-01-24 07:15:00	2007-07-22 03:30:00	2021-10-28 07:45:00	2019-10-19 08:15:00	1900-09-08	wwsww	109
20003	2020-08-11 22:15:00	2008-04-27 20:30:00	2000-08-28 10:15:00	2005-10-30 14:30:00	1998-04-06 21:45:00	1900-09-03	swsww	84	2020-08-11 22:15:00	2008-04-27 20:30:00	1993-10-06 06:30:00	2012-09-26 10:30:00	2000-08-28 10:15:00	1900-09-03	swwss	113
20007	2011-07-09 06:30:00	2000-11-06 17:00:00	2013-05-20 20:15:00	2000-08-28 08:30:00	2016-07-20 21:15:00	1900-08-29	swsss	90	2000-11-06 17:00:00	2008-08-07 01:00:00	2010-01-16 09:00:00	2020-12-04 19:00:00	2011-07-09 06:30:00	1900-08-31	wswws	96
21003	1959-07-27 14:15:00	2004-08-09 04:00:00	1970-09-08 14:15:00	1972-05-26 03:15:00	1961-01-27 13:15:00	1900-08-18 12:00:00	ssssw	86	1979-01-07 12:30:00	1965-11-01 00:30:00	1962-08-03 19:00:00	1959-07-27 14:15:00	1982-12-19 14:45:00	1900-09-27	wwssw	96
21005	2004-08-09 02:45:00	2018-09-19 14:00:00	1996-10-24 23:30:00	2015-06-01 21:45:00	1998-08-17 04:30:00	1900-08-14	sswss	77	2004-08-09 02:45:00	2000-09-11 11:45:00	1987-10-18 14:45:00	2021-02-20 23:00:00	2018-09-19 14:00:00	1900-08-17	sswss	106
21006	2004-08-04 04:30:00	1986-07-31 01:00:00	1987-07-10 17:30:00	1988-07-10 09:45:00	1989-09-18 20:15:00	1900-07-22	sssss	78	2004-08-04 04:30:00	2002-03-04 06:45:00	2003-05-30 16:15:00	2007-02-27 09:45:00	2000-09-11 10:00:00	1900-08-04	swsws	118
21007	1967-07-14 15:45:00	1963-03-05 19:45:00	2008-05-10 18:45:00	2020-03-03 17:15:00	1983-10-04 07:45:00	1900-08-06 12:00:00	swsww	84	2003-05-30 16:45:00	1963-03-05 19:45:00	1976-01-02 20:15:00	1967-07-14 15:45:00	1975-05-13 19:45:00	1900-08-14 12:00:00	swwss	111
21008	2005-06-28 04:00:00	2013-04-14 12:15:00	2009-03-08 03:00:00	2007-06-16 22:15:00	2016-12-23 17:00:00	1900-08-20	swwsw	108	2005-06-28 04:00:00	1991-02-24 03:00:00	2020-02-15 23:15:00	2007-06-16 22:15:00	2016-12-23 17:00:00	1900-03-10	swwsw	128
21009	1985-12-21 09:30:00	2001-03-07 12:45:00	2011-10-18 01:30:00	1982-12-19 17:45:00	2016-12-23 22:15:00	1900-09-19	wwwww	106	1985-12-21 09:30:00	1982-01-11 11:30:00	1959-10-27 12:15:00	1962-08-04 06:45:00	1985-07-27 02:30:00	1900-10-11	wwwss	128
21011	2008-05-10 17:30:00	2003-05-30 15:45:00	1997-06-13 16:15:00	2007-06-22 18:00:00	2004-08-09 17:15:00	1900-08-06	sssss	74	2003-05-30 15:45:00	2008-05-10 17:30:00	2005-01-08 06:45:00	2015-12-30 12:00:00	2009-11-19 20:45:00	1900-07-11 12:00:00	sswww	134
21012	2000-07-09 18:30:00	1988-07-10 07:30:00	2013-04-14 08:15:00	2002-08-30 15:15:00	2004-08-09 17:30:00	1900-08-15	sswss	66	2007-06-16 18:15:00	2013-04-14 08:15:00	2000-07-09 18:30:00	2004-08-09 17:45:00	2016-01-27 09:15:00	1900-08-18	swssw	115
21013	2002-01-03 16:45:00	1972-12-12 02:15:00	2012-08-29 15:00:00	1988-07-22 04:15:00	1974-01-05 17:15:00	1900-07-30	wwssw	92	1984-11-03 21:45:00	1972-12-12 02:15:00	2012-08-29 15:00:00	2002-01-03 16:45:00	1986-03-04 19:45:00	1900-09-24	wwsww	116
21014	2004-08-09	2011-05-07 02:30:00	1996-07-03 11:30:00	2002-08-07 08:30:00	1997-10-10 04:15:00	1900-07-26	ssssw	48	2004-08-09	2015-12-30 08:45:00	1987-10-18 06:45:00	2013-12-30 10:45:00	1996-10-24 21:15:00	1900-08-15	swwww	123
21015	2009-06-14 22:30:00	2002-10-20 19:00:00	1990-09-24 16:45:00	2021-10-05 15:15:00	1992-08-30 11:45:00	1900-08-29	swsws	56	2002-10-20 19:00:00	1990-10-06 20:15:00	1990-09-24 16:45:00	2009-06-14 22:30:00	1992-08-30 11:45:00	1900-09-14	wwsss	75
21016	1986-06-17 14:15:00	2000-08-28 10:30:00	1987-08-17 17:30:00	2019-07-11 17:00:00	1988-04-18 20:45:00	1900-08-03	ssssw	100	1987-08-17 17:30:00	2000-08-28 10:30:00	1984-11-03 13:15:00	1986-06-17 14:15:00	2021-12-04 22:00:00	1900-08-18	sswsw	111
21017	2017-05-27 16:15:00	2008-08-01 06:00:00	2018-06-02 15:15:00	2007-07-18 15:00:00	2002-05-13 18:45:00	1900-08-06	sssss	75	2017-05-27 16:15:00	2008-08-01 06:00:00	2005-10-11 20:00:00	2007-07-18 15:00:00	2009-07-29 00:30:00	1900-09-11	sswss	96
21018	2021-11-10 12:30:00	2003-05-30 16:30:00	1998-07-31 21:30:00	1999-11-05 10:30:00	2001-08-20 12:30:00	1900-08-09	wssws	89	2021-11-10 12:30:00	2003-05-30 16:30:00	2001-08-20 12:30:00	1998-07-31 21:30:00	1999-11-05 11:00:00	1900-08-10	wsssw	112
21019	2000-07-29 19:15:00	2006-08-18 16:30:00	2007-10-28 06:45:00	1992-08-13	2001-09-30 23:45:00	1900-08-15	sswss	68	2005-10-11 22:15:00	2000-09-11 10:00:00	2015-12-30 09:15:00	2011-12-08 11:00:00	2018-01-24 06:00:00	1900-07-20	wswww	123
21020	2008-05-10 15:30:00	1998-07-31 17:45:00	2007-07-03 19:15:00	2012-08-29 11:30:00	2016-12-23 13:00:00	1900-07-13	ssssw	66	2008-05-10 15:45:00	1997-02-19 16:30:00	2002-03-10 12:00:00	1986-10-04 19:15:00	2015-12-30 07:45:00	1900-08-10	swwww	108
21021	2005-04-18 17:30:00	1989-01-18 08:15:00	1985-07-26 19:45:00	1997-12-18 23:00:00	1982-12-19 14:00:00	1900-08-25 12:00:00	wwsww	108	2005-04-18 17:30:00	1982-12-19 14:00:00	1989-01-18 08:15:00	1985-07-26 19:45:00	1997-12-11 11:00:00	1900-08-25 12:00:00	wwwsw	124
21023	2007-12-22 14:15:00	1990-10-06 20:45:00	1994-12-08 14:30:00	2010-12-10 20:00:00	1993-12-29 18:00:00	1900-07-30	wwwww	124	2010-12-10 20:00:00	2000-11-07 02:45:00	2016-01-27 15:45:00	2007-12-22 14:15:00	1993-01-24 05:00:00	1900-05-02	wwwww	135
21024	2000-07-09 20:15:00	2020-07-27 19:30:00	2015-07-17 11:45:00	2019-07-31 14:00:00	2011-09-06 09:00:00	1900-08-13	sssss	59	2016-06-07 15:45:00	2012-08-05 08:00:00	2011-09-06 09:00:00	2014-08-08 21:00:00	2016-12-23 15:00:00	1900-08-08	ssssw	59
21025	2003-05-30 22:00:00	1993-10-03 01:45:00	2004-08-04 09:30:00	2013-04-14 13:15:00	2015-05-03 17:45:00	1900-08-05	swsws	89	2003-05-30 22:00:00	2012-08-05 08:30:00	2007-06-22 17:45:00	2013-04-14 13:15:00	1993-10-03 01:45:00	1900-07-21	sssww	103
21026	1992-08-03 02:45:00	2018-08-12 22:15:00	1988-07-10 03:15:00	1997-07-03 17:30:00	2010-12-10 17:15:00	1900-08-14	ssssw	99	2005-10-30 12:45:00	2008-08-06 22:45:00	2015-11-08 15:45:00	1992-08-03 02:45:00	2004-08-09 15:15:00	1900-08-17	wswss	127
21027	2013-05-21 02:30:00	2002-11-02 23:45:00	2002-07-31 02:30:00	1990-10-06 17:45:00	2014-06-13 17:00:00	1900-07-17	swsws	82	2002-11-02 23:45:00	2002-07-31 02:30:00	1987-06-06 06:00:00	2012-06-16 20:00:00	1998-11-03 03:00:00	1900-08-03 12:00:00	wsssw	108
77002	2019-08-06 06:00:00	2009-07-15 23:15:00	2002-07-30 17:30:00	1996-10-12 06:30:00	1995-10-03 06:30:00	1900-08-02	sssww	85	2002-07-30 17:30:00	2005-10-11 22:30:00	1995-10-03 06:30:00	2002-10-27 07:45:00	1991-07-20 18:15:00	1900-08-24	swwws	115
77003	1993-11-09 17:45:00	2002-08-02 14:30:00	1997-11-18 11:00:00	2012-08-04 17:15:00	2019-07-27 16:30:00	1900-08-10	wswss	94	2002-08-02 14:30:00	1988-07-22 05:15:00	2004-08-09 17:45:00	2008-08-01 09:30:00	2000-07-09 20:45:00	1900-08-05	sssss	115
77004	2002-09-07 07:15:00	2010-08-10 13:45:00	1995-10-03 06:00:00	2009-07-27 07:30:00	1989-09-21 07:15:00	1900-08-14	sswss	73	2007-06-28 19:30:00	2004-08-08 23:30:00	2002-08-02 15:15:00	2000-08-18 02:00:00	2011-07-16 09:00:00	1900-08-19	sssss	94
78003	1989-08-21 01:00:00	2016-12-23 15:00:00	1990-10-03 00:15:00	2005-10-24 11:45:00	2000-10-25 00:15:00	1900-07-31	swwww	73	2013-04-14 12:30:00	1999-07-10 18:15:00	2015-06-01 22:00:00	2007-10-28 11:45:00	2004-08-18 20:00:00	1900-09-06	wssws	109
78004	1989-05-03 10:15:00	2002-05-13 20:45:00	1996-05-22 17:00:00	1998-09-08 04:15:00	2005-04-06 04:00:00	1900-06-19	ssssw	87	1992-01-01 18:15:00	1989-05-03 10:15:00	2015-06-01 20:00:00	2014-03-20 14:45:00	2000-08-14 00:45:00	1900-07-23	wssws	101
78005	2012-08-27 15:15:00	2004-08-08 23:30:00	2015-06-01 21:00:00	1990-06-06 18:15:00	1994-09-06 13:15:00	1900-08-04	sssss	81	1992-08-03 06:00:00	2012-08-27 15:15:00	1990-06-06 18:30:00	2015-06-01 21:00:00	2004-08-08 23:30:00	1900-08-02	sssss	93
78006	2002-07-30 18:15:00	1995-01-31 07:00:00	2015-06-01 19:15:00	1988-02-01 11:30:00	2005-08-24 07:15:00	1900-08-09	swsws	104	1995-01-31 07:00:00	1997-11-18 06:45:00	1991-11-10 20:30:00	1996-10-27 05:15:00	1995-10-24 21:15:00	1900-10-21	wwwww	125
79002	2001-05-14 14:30:00	1999-01-13 11:45:00	2000-02-10 11:00:00	1988-12-18 20:30:00	1963-09-26 04:45:00	1900-09-21 12:00:00	swwws	118	2000-02-10 11:00:00	1967-02-27 14:15:00	1999-01-13 11:45:00	1972-12-11 18:45:00	1962-08-03 17:30:00	1900-10-01	wwwws	121
79003	1993-03-18 14:30:00	1988-12-18 16:45:00	1988-02-01 09:00:00	2005-11-07 20:45:00	2015-06-01 18:45:00	1900-08-10	wwwws	109	1993-03-31 13:30:00	2013-12-30 11:00:00	1988-02-01 09:00:00	1988-12-18 16:45:00	2015-12-30 12:00:00	1900-08-22	wwwww	119
79004	2007-06-12 15:30:00	2008-05-10 18:45:00	2015-07-17 05:15:00	2013-10-03 00:45:00	1988-07-10 03:45:00	1900-08-04	sssws	75	1990-06-06 16:45:00	2001-07-03 23:45:00	2015-07-17 05:15:00	2014-03-20 11:45:00	2007-06-12 15:30:00	1900-08-23	sssws	100
79005	1979-10-19 08:45:00	1982-11-12 09:15:00	1970-08-16 10:00:00	1971-10-17 13:45:00	1987-04-10 19:00:00	1900-08-16	wwsww	80	1982-11-12 09:30:00	2018-08-12 22:30:00	1985-09-21 07:30:00	2020-06-16 21:45:00	1990-08-29 14:45:00	1900-09-20 12:00:00	wssss	100
79006	1968-09-12 09:45:00	2001-07-04 00:45:00	1972-11-09 15:00:00	1982-10-26 13:30:00	2015-06-01 20:00:00	1900-09-15 12:00:00	sswws	93	2001-07-04 01:00:00	1985-09-21 07:45:00	2018-11-29 12:15:00	2003-01-17 05:30:00	1967-10-20 09:15:00	1900-10-04 12:00:00	sswww	114
80001	1999-07-10 21:30:00	1995-03-01 06:15:00	2003-01-17 07:15:00	1992-03-09 12:15:00	1995-10-13 00:15:00	1900-06-22	swwww	95	1999-07-10 21:30:00	2015-12-30 12:00:00	2001-07-04 02:45:00	2019-12-10 18:00:00	2011-01-11 04:00:00	1900-07-10	swsww	121
80002	1994-04-05 04:45:00	1988-02-24 15:30:00	1989-02-12 06:15:00	1990-08-23 05:30:00	1990-11-03 06:15:00	1900-06-05	wwwsw	117	1994-04-05 04:45:00	2007-12-27 08:30:00	2009-11-05 17:00:00	2008-12-05 08:30:00	2013-11-20 07:45:00	1900-08-04	wwwww	121
80003	2006-07-31 18:45:00	2012-08-04 14:30:00	2007-07-19 13:45:00	2000-09-11 04:30:00	1991-09-21 14:15:00	1900-09-07	sssss	53	2012-08-04 14:30:00	2006-07-31 18:45:00	1992-08-02 23:45:00	1991-09-21 14:15:00	2002-09-07 14:30:00	1900-08-27	sssss	60
80004	2010-01-16 03:30:00	2003-01-12 19:00:00	2020-08-12 18:15:00	2012-08-04 14:45:00	2002-09-07 14:15:00	1900-08-24	wwsss	89	2002-09-07 14:45:00	2010-01-16 03:30:00	2003-01-12 19:00:00	1998-09-01 09:45:00	1988-09-04 23:00:00	1900-09-01	swwss	74
80005	2001-02-10 15:30:00	2012-08-29 04:45:00	2010-10-02 12:45:00	2014-08-06 18:15:00	1994-09-06 07:15:00	1900-08-26 12:00:00	wswss	67	2005-11-07 20:15:00	1994-09-06 07:15:00	2010-10-02 12:45:00	2001-02-10 15:30:00	2012-08-04 15:00:00	1900-08-18	wswws	75
80006	1996-02-16 13:30:00	1998-10-17 09:45:00	2013-12-30 02:00:00	2015-12-30 02:00:00	2012-11-19 05:45:00	1900-08-14	wwwww	130	1996-02-16 13:30:00	2015-12-30 05:45:00	2009-04-27 05:30:00	1998-10-17 09:45:00	1999-12-03 03:45:00	1900-10-03	wwwww	127
81002	1993-06-26 21:15:00	1979-09-01 23:15:00	1983-10-04 01:00:00	2011-08-10 08:15:00	1980-07-27 04:15:00	1900-08-01	sswss	58	1993-06-26 21:15:00	1982-10-01 20:45:00	1980-07-27 04:15:00	1978-08-02 21:30:00	1966-09-02 06:30:00	1900-08-27 12:00:00	swsss	77
81003	1999-11-05 02:30:00	1995-07-11 20:00:00	2011-07-07 06:15:00	2003-11-02 01:15:00	2021-05-03 15:15:00	1900-08-30	wssws	83	1998-10-24 10:15:00	1994-10-23 01:45:00	1988-08-18 02:15:00	2021-05-03 15:15:00	1999-11-05 02:30:00	1900-10-22	wwssw	94
81004	1991-11-01 06:00:00	1988-01-19 05:00:00	1989-08-11 10:15:00	1990-07-19 14:30:00	1990-10-02 18:45:00	1900-10-11	wwssw	104	1991-11-01 06:00:00	1994-12-08 07:15:00	2001-01-05 10:30:00	2016-11-12 14:15:00	2012-11-19 19:00:00	1900-10-25	wwwww	119
81006	1991-08-09 05:30:00	1988-10-18 14:00:00	1991-10-16 06:00:00	2003-09-22 03:45:00	2005-09-19 17:45:00	1900-09-12	swwss	74	1993-05-17 15:15:00	2000-10-25 06:45:00	1991-10-16 06:00:00	1988-10-18 14:00:00	2020-06-17 20:00:00	1900-09-22	swwws	78
81007	2015-07-17 03:00:00	1998-09-01 09:45:00	1992-09-12 22:00:00	2006-09-29 14:00:00	1994-07-10 00:15:00	1900-08-29	sssss	73	1992-09-12 22:00:00	2015-07-17 03:00:00	1998-08-03 10:30:00	2002-10-24 19:15:00	2004-03-19 07:30:00	1900-08-21	sssww	87
82001	1996-04-03 09:30:00	1980-07-26 03:30:00	1988-08-30 09:00:00	1980-11-14 09:00:00	2000-09-11 09:30:00	1900-08-20	wssws	112	1996-04-03 09:30:00	1985-09-21 04:30:00	2000-09-11 09:30:00	1980-11-14 09:00:00	1980-07-26 03:30:00	1900-08-31	wssws	118
82002	1994-08-01 20:45:00	2000-09-11 08:45:00	1999-05-12 16:45:00	1981-09-17 23:45:00	1985-12-31 17:15:00	1900-09-17	ssssw	85	2000-09-11 08:45:00	1994-08-01 20:45:00	1981-09-20 00:45:00	1982-12-19 02:45:00	1985-12-31 17:15:00	1900-09-12	sssww	96
82003	1980-07-26 04:30:00	1999-06-19 20:15:00	1991-08-09 08:15:00	2007-09-16 12:00:00	2015-06-28 11:30:00	1900-08-14	sssss	65	1979-12-19 13:30:00	2001-11-21 16:00:00	1983-10-12 09:30:00	2012-06-23 09:30:00	1982-10-17 13:30:00	1900-08-14	wwwsw	98
83003	2001-07-04 01:45:00	1971-09-01 15:45:00	1993-06-09 18:45:00	2004-08-09 03:45:00	1999-05-12 16:45:00	1900-07-22	sssss	101	2001-07-04 01:45:00	1994-10-23 05:15:00	2010-01-15 22:30:00	1990-05-16 17:30:00	1971-09-01 15:45:00	1900-08-04	swwss	99
83004	2008-01-26 15:30:00	2011-08-26 17:30:00	2001-07-04 01:30:00	1983-03-05 19:45:00	1988-07-22 02:30:00	1900-08-24	wssws	87	1985-09-21 02:30:00	1982-09-27 17:30:00	1980-07-26 22:30:00	2001-07-04 01:45:00	1982-11-05 22:45:00	1900-10-08	ssssw	89
83005	1999-11-28 09:00:00	2015-07-17 07:30:00	2012-08-06 16:15:00	1986-05-10 05:45:00	2016-05-02 10:45:00	1900-08-19	wssss	77	1986-05-10 05:45:00	1982-11-23 10:45:00	2012-08-06 16:15:00	1999-11-28 09:00:00	1991-11-11 09:00:00	1900-09-16	swsww	91
83006	2001-07-04 05:30:00	2008-08-01 12:30:00	1987-06-06 08:45:00	2012-06-22 13:30:00	2007-07-26 10:15:00	1900-08-24	sssss	70	2001-07-04 05:30:00	2007-07-26 10:15:00	2007-10-04 01:45:00	2000-09-20 06:00:00	2012-06-22 13:30:00	1900-10-03	sswss	76
83007	2005-09-23 08:30:00	2014-05-19 21:45:00	1992-08-30 14:30:00	2004-05-10 00:30:00	2010-01-15 20:45:00	1900-06-29	ssssw	88	1992-08-30 14:30:00	2005-09-23 08:30:00	2019-07-31 18:45:00	2014-05-19 21:45:00	2011-02-07 07:15:00	1900-06-19	sssss	111
83008	2005-05-19 13:15:00	2012-08-06 18:00:00	2016-11-16 08:15:00	2007-09-16 12:30:00	2004-04-15 11:15:00	1900-08-20 12:00:00	sswsw	96	1985-10-01 08:00:00	2000-07-29 21:15:00	1999-03-28 18:30:00	2005-05-19 13:15:00	2012-08-06 18:15:00	1900-08-17	wswss	103
83009	2020-09-30 11:15:00	1991-08-08 07:00:00	2019-08-30 02:45:00	2016-03-01 01:15:00	2005-09-19 16:30:00	1900-08-15	sssws	77	1987-12-27 13:45:00	1983-10-15 08:00:00	1986-08-13 23:15:00	2020-09-30 11:15:00	2016-03-01 01:15:00	1900-08-14	wwssw	93
83010	2003-05-30 15:30:00	1995-09-13 16:30:00	1997-09-14 04:30:00	2002-08-06 23:45:00	2001-07-04 00:30:00	1900-09-09	sssss	79	1987-12-26 06:45:00	2007-12-02 00:30:00	1990-03-06 03:45:00	2003-09-22 00:15:00	1985-09-21 03:30:00	1900-09-21	wwwss	102
83011	2000-09-11 07:45:00	2001-07-03 23:15:00	2021-12-08 12:45:00	1999-05-12 12:45:00	2017-10-04 09:45:00	1900-10-09	sswsw	67	2010-01-16 08:30:00	2000-10-25 02:15:00	1994-01-14 01:00:00	2000-09-20 05:30:00	1994-12-08 07:15:00	1900-10-09	wwwsw	87
83013	2010-12-28 10:00:00	2012-08-06 14:30:00	2005-05-26 09:30:00	2015-11-12 18:00:00	2009-11-25 13:15:00	1900-10-08	wssww	74	2012-08-06 14:30:00	2005-05-26 09:30:00	2010-12-28 10:00:00	2009-11-25 13:15:00	2007-07-18 17:30:00	1900-09-30	sswws	101
84001	1960-07-12 13:30:00	1985-10-01 05:45:00	1956-08-13 09:15:00	1966-09-04 06:30:00	2000-09-11 13:30:00	1900-09-04 12:00:00	swsss	105	1985-10-01 05:45:00	1960-07-12 13:30:00	1956-08-13 09:15:00	1994-02-01 11:15:00	1983-10-18 10:15:00	1900-08-12 12:00:00	wssww	112
84003	1999-07-21 13:00:00	1972-01-24 11:00:00	1975-12-02 16:15:00	1968-10-03 10:00:00	1973-02-20 17:15:00	1900-08-16	swwww	110	1999-07-21 13:00:00	2008-02-05 15:15:00	2009-05-04 08:15:00	1972-01-24 11:00:00	2006-01-22 22:30:00	1900-09-11	swsww	115
84004	1995-03-25 09:00:00	2017-11-07 15:30:00	2010-01-16 04:00:00	1982-12-19 09:15:00	1979-01-15 23:15:00	1900-10-03	wwwww	107	1995-03-25 09:00:00	2013-12-30 20:00:00	1981-09-20 08:30:00	1982-02-09 00:30:00	1979-11-25 18:00:00	1900-09-20	wwsww	136
84005	1987-08-20 21:30:00	1985-09-21 04:00:00	2009-05-06 23:45:00	1973-12-11 11:45:00	1995-10-22 11:15:00	1900-09-10	sssww	101	1985-09-21 04:00:00	1973-12-11 11:45:00	1982-12-19 07:45:00	1987-08-20 21:30:00	1991-12-22 08:15:00	1900-09-11 12:00:00	swwsw	112
84006	1976-05-22 03:00:00	1981-09-18 03:00:00	2020-08-04 13:00:00	2021-09-30 08:15:00	2009-09-08 07:15:00	1900-06-01 12:00:00	sssss	67	1981-09-18 03:00:00	1976-05-22 03:15:00	1982-09-27 15:30:00	1999-04-20 09:00:00	2020-08-04 14:15:00	1900-06-26 12:00:00	sssws	78
84008	2011-08-26 16:00:00	2004-08-08 22:00:00	2020-06-10 16:15:00	1994-07-31 19:15:00	2016-07-20 09:45:00	1900-07-31	sssss	89	2008-09-02 21:15:00	2004-12-14 12:30:00	2012-08-04 19:45:00	2006-05-04 22:00:00	1994-02-01 07:15:00	1900-09-20	swssw	114
84009	2001-07-04 00:15:00	1978-06-22 20:15:00	2007-07-18 18:00:00	2018-06-01 16:00:00	1999-07-10 19:15:00	1900-08-05	sssss	87	2001-07-04 00:15:00	2007-07-18 18:00:00	1982-09-27 14:15:00	1982-12-19 04:15:00	2000-09-11 09:45:00	1900-08-20	sssws	104
84011	2008-07-31 04:00:00	1994-07-31 21:00:00	2014-05-20	1988-10-19 04:15:00	1981-09-17 03:45:00	1900-08-05	sssws	90	1981-01-01	1999-11-26 12:15:00	1983-02-04 18:30:00	1980-09-07 09:45:00	1986-08-14 02:45:00	1900-08-09	wwwss	106
84012	1994-12-28 14:00:00	1985-09-30 23:45:00	1990-02-06 09:45:00	1981-09-20 04:30:00	1989-03-19 13:30:00	1900-09-20	wswsw	116	1994-12-28 14:00:00	1981-09-20 04:30:00	1981-10-01 09:00:00	1985-09-30 23:45:00	1979-12-26 23:45:00	1900-08-05	wswsw	135
84013	1995-03-25 09:00:00	1981-01-18 00:30:00	1982-12-19 07:30:00	1987-12-26 14:15:00	1985-10-01 04:45:00	1900-09-13	wwwww	105	1981-01-18 00:30:00	1992-11-02 10:00:00	1995-03-25 09:00:00	1989-09-04 11:45:00	1985-10-01 04:45:00	1900-10-11	wwwsw	108
84014	1993-07-08 18:15:00	1979-03-25 09:00:00	1997-04-24 02:00:00	1984-10-04 02:30:00	1989-09-22 09:00:00	1900-08-05	swwws	86	1994-03-03 06:00:00	2002-08-07 01:45:00	1984-01-13 03:30:00	1980-11-20 16:15:00	1979-03-08 09:00:00	1900-09-04	wswww	105
84016	2002-07-30 16:15:00	2005-06-09 08:30:00	2001-07-04	1997-09-16 11:15:00	1988-08-18 15:30:00	1900-08-01	sssss	91	2002-07-30 16:15:00	1988-08-18 15:30:00	1997-09-16 11:15:00	2012-06-22 13:45:00	2005-06-09 08:30:00	1900-08-14	sssss	105
84017	2008-01-13 09:00:00	1979-12-27 12:45:00	2006-09-20 09:45:00	2005-04-06 14:45:00	2015-10-24 05:45:00	1900-08-07	wwsww	91	2008-01-13 09:00:00	1979-12-27 12:45:00	1991-06-14 09:45:00	1987-08-16 05:00:00	1982-12-14 10:00:00	1900-09-08	wwssw	107
84018	1995-03-25 09:00:00	1995-11-16 02:15:00	1988-07-22 10:30:00	2012-01-05 00:15:00	2007-01-03 15:30:00	1900-08-24 12:00:00	wwsww	139	1995-03-25 09:00:00	1992-05-13 00:45:00	2012-01-05 00:15:00	2012-11-22 19:15:00	1995-11-16 02:15:00	1900-03-28	wswww	142
84019	2001-07-03 22:45:00	2005-06-30 17:00:00	2020-08-12 05:15:00	2016-07-20 08:45:00	1995-07-14 12:30:00	1900-08-06	sssss	60	2000-09-12 08:45:00	2001-07-03 22:45:00	1992-05-21 08:00:00	2003-11-29 19:15:00	2020-08-12 05:15:00	1900-08-06	sssws	95
84020	2019-07-31 20:00:00	2015-10-06 10:30:00	2007-06-22 19:15:00	2009-05-09 14:00:00	2002-08-15 04:00:00	1900-08-26	swsss	68	2002-07-30 16:45:00	1991-01-01 16:45:00	1984-10-29 10:00:00	1986-08-16 03:00:00	2009-05-09 14:00:00	1900-09-20	swwss	77
84022	1992-11-12 10:45:00	2020-06-17 22:00:00	2000-08-09 15:30:00	1994-08-24 18:30:00	1988-08-18 06:00:00	1900-08-09	wssss	80	2007-06-22 17:45:00	2010-12-28 13:00:00	1988-08-18 06:00:00	2010-01-15 19:30:00	1999-05-12 17:15:00	1900-08-05	swsws	108
84023	1991-08-09 04:00:00	2000-08-02 16:45:00	1989-10-31 07:45:00	2003-01-26 05:00:00	1998-04-29 21:00:00	1900-08-09	sswww	81	2019-08-31 10:00:00	2005-06-30 17:15:00	1988-08-18 16:00:00	1993-03-17 04:00:00	1992-08-12 23:15:00	1900-08-07	sssws	86
84025	2000-08-02 15:45:00	2001-07-04 01:15:00	2010-12-28 06:30:00	2002-07-30 16:00:00	2016-07-20 10:30:00	1900-08-14	sswss	67	2010-12-28 06:30:00	1986-12-30 11:45:00	2002-07-30 16:00:00	1988-11-30 01:45:00	2001-07-04 01:15:00	1900-08-14	wwsws	100
84026	2021-07-04 14:00:00	1980-07-26 01:15:00	2004-08-17 14:30:00	2011-07-17 17:30:00	2008-07-03 15:30:00	1900-08-14	sssss	71	1998-09-02 17:30:00	2002-07-30 15:30:00	2000-09-24 17:30:00	1987-08-16	2011-07-17 17:30:00	1900-08-15	sssss	91
84029	2003-05-30 14:30:00	1992-08-30 14:30:00	1993-09-10 19:30:00	2002-07-30 16:15:00	2015-02-28 18:15:00	1900-08-06	ssssw	94	2002-07-30 16:30:00	2003-05-30 14:45:00	2000-09-20 04:30:00	2011-10-17 15:00:00	2016-01-10 18:15:00	1900-09-17	sssww	124
84035	2011-08-26 14:45:00	1997-07-13 15:45:00	2016-07-20 08:15:00	2019-08-03 18:15:00	2000-09-01 15:15:00	1900-07-27	sssss	50	2001-07-03 23:45:00	1997-07-13 15:45:00	1991-07-08 12:30:00	1994-11-14 15:30:00	2006-08-01 17:30:00	1900-08-03	sssws	105
84037	2010-01-16 07:30:00	1989-09-24 15:15:00	2021-05-13 17:00:00	2001-07-04 02:30:00	1994-10-23 02:45:00	1900-07-11	wsssw	115	2010-01-16 07:30:00	2001-07-04 02:30:00	2013-12-30 08:00:00	2002-02-22 06:00:00	2015-01-15 03:45:00	1900-07-14 12:00:00	wswww	128
84040	2010-12-29 18:30:00	2015-06-01 20:15:00	2007-10-28 05:15:00	2017-11-07 07:30:00	2020-08-25 14:00:00	1900-08-25	wswws	86	2015-12-30 09:45:00	2015-06-01 20:15:00	2006-11-19 21:15:00	2010-12-29 18:30:00	2009-11-19 17:45:00	1900-09-07 12:00:00	wswww	140
85001	1990-07-17 05:45:00	1981-09-18 08:00:00	1978-10-03 13:15:00	1978-04-17 17:30:00	1980-05-30 14:45:00	1900-08-01	sswws	74	1992-03-18 16:00:00	1990-07-17 05:45:00	1982-07-01	2009-07-21 12:15:00	2004-03-19 04:15:00	1900-08-07	wsssw	81
85002	1982-09-10 11:15:00	1985-10-01 03:15:00	1986-12-05 01:45:00	1988-10-19 04:30:00	1981-09-23 16:45:00	1900-08-22	swwws	109	1982-09-10 11:15:00	1986-12-05 01:45:00	1993-05-18 09:30:00	1981-05-01	1985-10-01 03:15:00	1900-08-23	swssw	125
85003	2008-07-30 01:30:00	2005-08-31 19:00:00	2015-08-10 14:30:00	2000-09-06 05:00:00	1991-07-01 14:00:00	1900-08-19	sssss	76	2012-06-28 17:15:00	2006-09-29 16:00:00	2019-08-04 18:15:00	2005-08-31 19:00:00	2000-09-06 05:00:00	1900-09-10	sssss	89
85004	2013-07-03 09:00:00	2010-09-11 06:15:00	2011-07-07 17:30:00	1994-08-24 16:15:00	1986-03-08 16:15:00	1900-08-01	ssssw	77	2000-06-08 10:45:00	1998-02-11 09:00:00	1994-08-24 16:15:00	1986-01-10 03:00:00	2000-10-17 23:45:00	1900-09-10	swsww	83
88001	2010-09-11 06:00:00	2018-12-18 10:30:00	2000-09-11 07:45:00	1996-02-05 07:45:00	2010-10-01 11:00:00	1900-10-11	swsww	108	2018-12-18 10:30:00	1997-11-17 23:30:00	2012-11-19 02:15:00	1998-10-24 11:00:00	2019-10-06 01:15:00	1900-10-26	wwwww	98
89002	2001-07-06 17:30:00	2004-05-10 17:15:00	1999-05-21 07:00:00	1995-03-23 09:00:00	1996-07-03 10:15:00	1900-07-04	sssws	93	2001-07-06 17:30:00	1995-03-23 09:00:00	1996-07-03 10:15:00	2004-05-10 17:15:00	2015-08-10 14:15:00	1900-09-11	swsss	101
89003	2018-12-18 15:15:00	1994-08-03 20:00:00	1995-03-23 09:00:00	1996-10-04 10:30:00	2015-08-10 14:30:00	1900-08-08 12:00:00	wswws	102	1996-10-04 10:30:00	2018-12-18 15:15:00	1983-01-01 08:00:00	1995-03-23 09:00:00	1991-04-01 08:30:00	1900-09-27	wwwww	102
89004	2004-05-10 19:00:00	2003-04-01 01:30:00	2010-04-05 06:30:00	2013-10-03 01:30:00	2006-01-09 19:15:00	1900-07-22 12:00:00	swwww	93	1995-07-20 05:30:00	1997-04-23 15:45:00	1995-10-02 19:15:00	1999-06-19 14:30:00	1997-12-05 22:15:00	1900-08-30	swwsw	112
89005	2000-09-06 04:45:00	2004-10-06 05:45:00	1995-03-23 09:00:00	2006-09-01 05:30:00	2011-02-03 18:00:00	1900-08-11 12:00:00	swwsw	101	2014-10-28 05:45:00	2004-10-06 05:45:00	2010-10-29 18:00:00	1983-12-27 12:45:00	2010-09-13 15:30:00	1900-10-09	wwwws	127
89006	1991-04-11 05:00:00	1992-05-05 22:00:00	1998-02-12 11:15:00	2012-11-19 05:15:00	1980-08-11 14:45:00	1900-08-10	wswws	87	1991-04-11 05:00:00	1998-02-12 11:15:00	2018-09-15 12:30:00	1992-05-05 22:00:00	2019-09-08 10:15:00	1900-09-18	wwsss	111
89007	2007-06-12 18:45:00	1991-10-16 01:45:00	2000-09-06 04:15:00	1994-02-01 09:00:00	1986-08-13 22:30:00	1900-08-17	swsws	76	1983-10-15 06:45:00	2007-06-12 18:45:00	2017-08-23 04:15:00	1988-09-06 18:45:00	1991-10-16 01:45:00	1900-09-07	wsssw	98
89008	2018-06-03 17:30:00	2003-07-19 13:00:00	2012-06-26 16:15:00	2014-08-03 15:00:00	2021-08-08 14:45:00	1900-08-27	sssss	76	2012-06-26 16:15:00	2002-08-15 02:00:00	2004-08-09 08:30:00	1985-10-04 03:45:00	2005-08-31 17:30:00	1900-08-20	sssws	98
90003	2021-08-11 16:45:00	2012-06-28 19:30:00	2013-04-14 01:45:00	2014-10-03 05:30:00	2007-07-14 02:30:00	1900-08-23 12:00:00	sswws	78	2008-07-31 04:30:00	2001-09-12 11:30:00	2001-10-01	1995-07-19 17:00:00	2020-01-02 13:15:00	1900-09-10	sswsw	87
91002	1998-12-15 05:45:00	1998-03-01 06:30:00	2006-10-06 02:45:00	1980-10-28 13:15:00	1992-01-01 04:45:00	1900-08-09	wwwww	87	2012-06-28 21:45:00	1998-12-15 06:00:00	1980-07-26 02:00:00	1998-03-01 06:30:00	2017-12-06 10:15:00	1900-09-27 12:00:00	swsww	115
92001	2015-01-09 01:30:00	2002-01-28 05:30:00	2016-01-29 07:15:00	2010-11-08 07:00:00	1999-11-30 03:00:00	1900-10-19 12:00:00	wwwww	124	2020-10-15 14:45:00	2002-01-28 05:30:00	2011-12-08 15:15:00	2013-12-05 06:30:00	2016-12-26 06:15:00	1900-02-16	wwwww	138
92002	2003-07-18 13:45:00	2007-06-21 15:45:00	2009-07-17 18:45:00	2012-07-22 17:15:00	2004-08-26 18:30:00	1900-08-14	sssss	66	2007-06-21 15:45:00	2005-11-14 16:45:00	2003-07-18 13:45:00	2017-08-23 05:00:00	1987-08-20 13:45:00	1900-09-10	swsss	79
92003	2005-11-20 13:45:00	2003-05-07 18:30:00	2004-08-10 12:45:00	2002-02-21 15:00:00	2000-09-11 09:15:00	1900-07-29	wssws	78	2005-11-11 22:15:00	2001-12-03 16:30:00	2005-01-11 14:00:00	2004-09-12 21:15:00	2000-12-02 02:45:00	1900-08-28	wwwsw	99
92004	2021-10-26 22:00:00	2008-07-31 04:45:00	2009-07-26 09:45:00	2010-07-01 10:30:00	2011-05-07 20:30:00	1900-07-26	wssss	88	2014-02-06 15:45:00	2021-08-08 18:45:00	2010-12-27 15:30:00	2012-01-18 02:30:00	2019-08-31 09:15:00	1900-08-31	wswws	98
93001	2013-09-15 07:30:00	2012-01-18 01:30:00	2011-09-06 08:15:00	2014-10-19 09:00:00	2019-07-24 07:45:00	1900-09-13	swsws	107	1983-12-31 09:30:00	2007-01-15 01:00:00	1990-09-18 19:15:00	1990-12-11 09:00:00	2008-10-20 02:00:00	1900-09-14 12:00:00	wwsww	127
93002	2007-06-21 18:00:00	2006-09-24 20:45:00	2004-08-18 16:45:00	2013-09-15 07:45:00	2016-06-24 19:45:00	1900-07-20	sssss	68	2005-09-13 10:45:00	2018-10-23 05:15:00	2016-02-01 02:45:00	2004-08-18 16:45:00	2013-09-15 07:45:00	1900-09-07	swwss	95
94001	2009-10-03 10:45:00	2021-11-27 02:30:00	1986-11-05 06:15:00	1972-04-14 13:15:00	1972-12-11 19:15:00	1900-10-25	wwwww	107	2011-12-26 15:15:00	2015-01-12 10:30:00	2016-01-29 07:30:00	2006-12-04 05:00:00	2008-11-14 16:45:00	1900-04-15	wwwww	145
94003	2016-08-03 15:15:00	2011-12-19 15:15:00	2013-07-29 19:00:00	2021-11-04 15:15:00	2011-07-13 12:00:00	1900-08-26 12:00:00	swsws	101	2013-07-29 19:00:00	2016-08-03 15:15:00	2011-12-19 15:15:00	2014-08-11 12:45:00	2020-09-13 12:00:00	1900-08-28	sswss	99
95001	2008-10-29 12:30:00	1981-09-20 17:30:00	2011-10-18 13:30:00	1991-10-18 12:30:00	2015-12-09 14:15:00	1900-10-18	wswww	85	2008-10-29 12:30:00	2002-05-28 15:15:00	1981-09-20 17:45:00	2011-10-18 13:15:00	2004-01-19 12:30:00	1900-10-04	wssww	106
95002	2011-07-10 15:15:00	2003-04-01 01:00:00	2012-02-04 15:15:00	2014-08-03 19:00:00	2007-07-05 20:00:00	1900-08-25	swwss	110	2015-08-10 16:30:00	2015-12-30 04:45:00	2003-04-01 01:00:00	1990-01-14 21:15:00	1992-01-06 09:00:00	1900-09-14	swwww	121
95003	2015-08-10 16:30:00	2014-08-06 14:30:00	2011-07-10 06:30:00	2019-09-27 14:00:00	2021-07-10 17:15:00	1900-08-08 12:00:00	sssss	50	2014-08-06 14:30:00	2018-10-23 02:15:00	2015-08-10 16:30:00	2017-10-07 07:30:00	2011-07-10 06:30:00	1900-08-08	swsws	84
95004	2017-08-25 14:30:00	2015-08-10 17:15:00	2014-08-06 14:30:00	2019-07-24 09:15:00	2010-08-23 21:15:00	1900-08-10	sssss	68	2017-08-25 14:30:00	2015-08-10 17:30:00	2019-07-24 09:15:00	2016-02-01 04:15:00	2021-10-26 11:45:00	1900-08-23	ssssw	96
95005	2006-10-26 23:15:00	2009-02-16 18:00:00	2013-12-05 02:15:00	2005-11-14 18:15:00	2019-05-26 17:00:00	1900-10-09	wwwws	129	2006-10-26 23:15:00	2009-02-16 18:00:00	2005-11-14 18:15:00	2021-11-20 09:45:00	2014-08-11 09:00:00	1900-09-15	wwwws	130
95006	2014-08-11 10:30:00	2014-10-08 01:45:00	2013-09-16 21:30:00	2019-01-13 01:45:00	2016-01-29 04:45:00	1900-08-11	swsww	129	2019-01-13 03:45:00	2010-12-10 20:00:00	2014-10-08 01:45:00	2008-01-27 03:15:00	2014-08-11 10:45:00	1900-03-15	wwwws	133
96001	1980-08-01 18:45:00	1988-07-07 13:00:00	1982-05-22 19:15:00	1985-12-31 13:30:00	1987-01-19 10:00:00	1900-08-01	sssww	86	1987-01-19 10:00:00	2010-01-13 14:45:00	1988-07-07 13:15:00	1980-07-26 04:00:00	1985-12-31 13:30:00	1900-08-24	wwssw	100
96002	2010-01-14 11:15:00	1998-06-27 16:30:00	1996-01-02 11:00:00	1985-12-01 06:30:00	2013-05-13 23:00:00	1900-07-30	wswws	100	2010-01-14 11:15:00	1998-06-27 16:30:00	1983-10-04 18:30:00	2006-10-26 18:00:00	1985-12-01 06:30:00	1900-09-07 12:00:00	wswww	121
96003	1998-06-27 18:15:00	2010-12-28 13:30:00	1996-01-02 06:45:00	1985-12-31 15:00:00	2005-06-13 04:15:00	1900-07-01	swwws	100	1998-06-27 18:30:00	2010-12-28 13:30:00	1996-01-02 06:45:00	1985-12-31 15:00:00	1989-04-12 04:30:00	1900-08-01	swwww	108
96004	2002-09-25 14:15:00	2013-06-22 18:00:00	2006-07-11 07:15:00	2011-07-16 13:30:00	2007-07-03 14:45:00	1900-08-25	sssss	78	2016-07-20 04:45:00	2017-08-25 16:00:00	1995-09-08	2015-08-10 18:15:00	2014-08-11 04:45:00	1900-08-25	sssss	95
96005	2015-08-10 19:00:00	2010-12-10 15:00:00	2016-11-16 03:45:00	2010-09-20 03:00:00	2011-11-23 05:15:00	1900-08-17	swwsw	77	2010-12-10 15:00:00	2016-11-16 03:45:00	2015-08-10 19:15:00	2011-11-23 05:15:00	2007-12-07 04:30:00	1900-09-15 12:00:00	wwsww	78
96006	2019-07-11 16:00:00	2012-01-21 05:30:00	2014-10-28 05:30:00	2017-06-06 21:30:00	2016-01-08 03:00:00	1900-08-28	swwsw	109	2014-08-11 06:00:00	2019-07-11 16:00:00	2012-01-21 05:30:00	2021-08-04 23:15:00	2008-09-01 15:30:00	1900-08-11	sswss	117
97002	2010-12-28 10:15:00	1978-02-23 05:00:00	1985-12-31 15:15:00	2010-01-14 12:30:00	2014-08-11 04:45:00	1900-09-24	wwwws	125	2006-10-26 14:00:00	1978-02-23 05:00:00	2010-01-14 12:30:00	2010-12-28 10:15:00	1985-12-31 15:15:00	1900-08-14 12:00:00	wwwww	137
105001	2010-01-15 08:30:00	2008-04-25 23:30:00	2016-02-16 11:15:00	2019-02-15 22:15:00	2012-02-04 13:30:00	1900-05-27	wwwww	115	2010-01-15 08:30:00	2016-09-24 09:00:00	2001-06-19 12:30:00	2010-12-04 21:00:00	2001-10-29 03:30:00	1900-09-14	wssww	123
106001	1998-07-21 20:15:00	2011-10-24 01:15:00	2000-10-03 20:45:00	1998-11-06 18:30:00	2013-12-05 05:00:00	1900-10-04	swwww	118	1998-07-21 21:00:00	2010-01-16 07:45:00	2007-08-06 22:00:00	2011-10-24 01:15:00	2000-02-10 03:45:00	1900-10-15	swsww	126
106002	2021-09-09 12:45:00	2014-10-03 01:30:00	2013-08-02	2016-09-23 16:45:00	2007-10-26 07:15:00	1900-09-26	swssw	67	2013-10-22 19:45:00	2011-11-22 23:45:00	2015-03-28 07:00:00	2019-08-28 02:45:00	2013-08-02	1900-09-17	wwwss	59
106003	2011-08-04 08:30:00	2013-07-26 14:15:00	2012-08-07 12:15:00	2014-07-31 07:30:00	2010-07-01 09:00:00	1900-08-08	sssss	37	2017-08-23 00:30:00	2021-11-12 10:30:00	2019-08-28 01:00:00	2014-10-19 04:00:00	2020-10-31 08:15:00	1900-08-23	swsww	51
107001	2007-12-03 12:00:00	2017-06-07 12:30:00	2015-01-13 00:15:00	2012-10-20 05:15:00	2006-10-26 15:15:00	1900-09-01 12:00:00	wswww	112	2005-03-16 09:00:00	2017-06-07 12:30:00	2006-10-26 15:15:00	2013-11-03 06:45:00	2011-08-28 13:00:00	1900-09-15	wswws	115
108001	2002-06-26 06:15:00	2006-05-24 19:15:00	2009-10-27 11:30:00	2008-11-04 15:30:00	2003-10-22 10:30:00	1900-09-07	sswww	94	2007-08-20 10:45:00	2005-08-31 23:45:00	2008-10-04 10:45:00	2010-07-11 06:15:00	2011-12-08 14:00:00	1900-09-25	sswsw	101
id	top1_l	top2_l	top3_l	top4_l	top5_l	median_l		std_l	top1_f	top2_f	top3_f	top4_f	top5_f	median_f	Season	std_f
Number of stations where summer maximum H coincides with summer Max Q (Rank 1)					43
Number of stations where summer maximum H coincides with summer Max Q (Rank 2)					30
Number of stations where summer maximum H coincides with summer Max Q (Rank 3)					11
Number of stations where summer maximum H coincides with summer Max Q (Rank 4)					16
Number of stations where summer maximum H coincides with summer Max Q (Rank 5)					10	Total 110
Number of stations where summer Max H does not coincide with Rank 1 to 5 Max Q					70
Number of stations with Max h in summmer					180
Comparison of original Max H 15-min rise with the new data for stations with H rise >1.0 m
of 20 stations
6 coincide with new Max H and Max Q
12 new max H coincide with old max H
9 old max H coincide with Max Q Rank 1
4 further old max H coincide with max Q Rank 2
5 further old max H coincide with Max Q (Rank 3 4 and 5)
Although the remaining 2 coincide between old and New H max, they do not appear in the 5 highest ranked Q. Why?

## Sheet: Discharge
	Level	Dates							Discharge	Dates							Peak 15 m Q		Peak 15 m for Hmax						Area				FF qmed
1001	2010-12-28 06:45:00	2012-10-20 04:30:00	1999-04-21 04:00:00	2020-02-29 08:00:00	1996-01-01 18:15:00	1900-07-09	wwwws	95	2006-10-12 01:45:00	1997-07-01 09:30:00	2010-08-05 23:30:00	2012-10-20 04:30:00	2016-06-24 15:45:00	1900-10-07	wssws	89	3.66			Too small						1001	0.102121		35.84
2001	1980-07-26 04:45:00	1978-02-23 02:45:00	1981-12-13 16:30:00	2001-02-11 14:30:00	1988-10-26 04:15:00	1900-08-31	swwww	118	1980-07-26 05:00:00	1978-02-23 02:45:00	2001-02-11 14:30:00	1988-01-20 11:45:00	1980-11-24 17:15:00	1900-10-04	swwww	120	33.62	x		not a wow						2001	0.201486		166.86
2002	2013-02-05 15:15:00	2014-08-11 08:30:00	2006-10-02 05:30:00	2014-10-07 18:00:00	2002-02-22 00:45:00	1900-09-24 12:00:00	wswww	105	2013-02-05 15:15:00	2014-08-11 10:00:00	2005-11-26 02:15:00	2006-10-26 07:15:00	2002-01-28 14:15:00	1900-08-31 12:00:00	wswww	131	30.48	x		winter						2002	0.198858		153.275
3002	2004-09-12 06:15:00	2017-11-07 00:30:00	2016-08-08 02:45:00	2011-09-06 12:00:00	1975-07-15 01:00:00	1900-09-06	swsss	86	2018-10-23 04:45:00	2017-11-07 00:30:00	2014-10-07 14:00:00	2016-08-08 02:45:00	2005-12-15 19:45:00	1900-09-26	wwwsw	98	63	x		winter						3002	0.354171		177.88
3003	2014-08-29 15:30:00	2015-08-10 17:30:00	2012-08-21 20:30:00	2013-07-29 19:30:00	2001-01-24 14:15:00	1900-08-10	ssssw	92	2015-08-10 17:45:00	1978-10-05 11:30:00	1990-03-10 13:15:00	2013-07-29 19:30:00	2014-08-29 15:30:00	1900-09-11	swwss	96	77.11	x	61.79	10/8/15 2.81 - 64.6 - 141.7						3003	0.221842		347.59	350
3004	2006-07-11 09:15:00	2013-04-16 20:45:00	2011-07-16 15:15:00	2019-07-31 10:45:00	2001-05-29 03:00:00	1900-08-02	swsss	90	2014-08-06 18:00:00	2019-07-31 10:45:00	2006-07-11 09:15:00	2001-05-29 03:00:00	2010-12-30 11:45:00	1900-08-02	ssssw	95	51.39	x	43.73	11/7/06 0.69 - 44.4 - 48.0						3004	0.275786		186.34	NA
3006	2014-08-11 06:15:00	2013-09-03 10:00:00	2008-03-21 14:30:00	2021-11-18 04:45:00	2016-12-23 20:15:00	1900-08-22 12:00:00	sswww	122	2014-08-11 06:15:00	2013-09-03 10:00:00	2018-10-23 03:00:00	2012-01-12 01:00:00	2021-11-18 04:45:00	1900-09-15	sswww	129	6.5	OK		8/11/14 but small increase			Lake outflow!			3006	0.167785		38.74	NA
4001	1979-02-26 15:30:00	2010-11-03 12:45:00	1982-10-01 09:00:00	1987-01-13 17:00:00	2016-01-29 09:30:00	1900-06-18	wwwww	130	1979-02-26 15:30:00	1980-12-14 18:30:00	1981-10-28 17:30:00	1979-10-22 07:45:00	1982-10-01 09:00:00	1900-05-04	wwwww	141	116.62	x		All winter						4001	0.43971		265.22
4003	1975-07-15	1977-08-25 08:15:00	1974-07-12 21:30:00	2019-07-10 14:30:00	1980-06-06 19:45:00	1900-08-06	sssss	64	1975-07-15	2019-07-10 14:30:00	1977-08-25 08:15:00	2012-08-06 23:15:00	2006-10-26 08:15:00	1900-08-17 12:00:00	ssssw	85	24.03	ok		1975-07-15						4003	0.300563		79.95
4005	2007-07-03 14:15:00	2019-07-30 21:30:00	2004-08-16 18:15:00	1988-07-07 15:45:00	1992-01-06 08:15:00	1900-07-30	ssssw	87	2004-12-21 21:15:00	2004-02-02 17:15:00	2003-03-09 11:00:00	2019-07-30 21:30:00	2007-07-03 14:15:00	1900-07-30	wwwss	128	44.56	x		winter 3/7/2007 is not wow						4005	0.438453		101.63
4006	2010-01-16 06:30:00	1990-12-11 06:00:00	2010-12-29 22:45:00	2001-01-24 14:15:00	1996-01-04 08:30:00	1900-09-11	wwwww	120	2010-01-16 06:30:00	2013-12-14 15:45:00	2013-01-02 19:00:00	2014-10-21 06:00:00	2010-12-29 22:45:00	1900-05-05	wwwww	134	78.66	x		all winter						4006	0.934759		84.15	80.6
4007	2002-08-06 22:00:00	2020-01-11 03:30:00	2018-10-23 07:00:00	2005-12-15 21:00:00	2017-08-25 18:15:00	1900-09-15	swwws	111	2020-01-11 03:45:00	2010-12-10 12:30:00	2018-01-28 22:45:00	2005-12-15 21:00:00	2017-08-25 18:30:00	1900-07-28	wwwws	132	48.56	x	13.1	2002-08-06	small wow					4007	0.370687		131
4008	2015-08-10 19:30:00	2011-06-13 11:00:00	2006-10-24 05:15:00	1998-05-14 18:30:00	2000-08-27 23:45:00	1900-08-10	sswss	90	2006-10-24 05:15:00	2011-12-08 15:00:00	2015-01-15 13:00:00	1997-05-19 04:00:00	2017-11-21 21:15:00	1900-08-20	wwwsw	124	12.43	x		winter						4008	1.1782		10.55
4009	1997-07-01 08:00:00	2000-08-18 21:30:00	1995-11-26 23:30:00	2010-12-10 13:45:00	1998-06-25 13:30:00	1900-07-11	sswws	56	2013-12-28 09:00:00	2014-10-28 05:15:00	2000-08-18 21:30:00	2004-08-18 17:45:00	2002-02-21 20:00:00	1900-08-19	wwssw	108	1	x		Too small						4009	0.185874		5.38
4010	2016-02-01 05:00:00	2019-07-30 20:30:00	2020-01-07 14:30:00	2016-12-23 12:15:00	2014-12-09 12:45:00	1900-10-24 12:00:00	wswww	134	2020-01-07 14:30:00	2016-01-29 05:45:00	2013-12-05 05:30:00	2019-07-30 20:45:00	2015-01-09 23:45:00	1900-08-06 12:00:00	wwwsw	146	7.71	x		winter						4010	0.0929364		82.96
4011	2016-06-07 14:30:00	2012-07-22 16:30:00	2019-07-30 19:30:00	2015-06-25 17:15:00	2013-09-15 07:30:00	1900-08-12 12:00:00	sssss	83	2016-06-07 14:30:00	2019-07-30 19:30:00	2012-07-22 16:30:00	2016-10-18 00:45:00	2011-09-25 17:45:00	1900-07-26 12:00:00	sssws	92	27.41	27.41		2016-06-07						4011	0.49575		55.29
5003	1989-04-13 01:45:00	1990-02-14 13:45:00	1990-11-12 17:30:00	1991-10-28 17:30:00	1993-04-23 04:45:00	1900-06-18	wwwww	103	1990-02-14 13:45:00	1993-04-23 04:45:00	2009-02-13 09:45:00	2009-12-06 17:00:00	2018-08-27 17:15:00	1900-04-27 12:00:00	wwwws	112	48.73	x		Winter 27/8.2018 not a wow						5003	0.255278		190.89
5004	2021-07-05 20:00:00	2008-12-03 22:00:00	2017-08-26 01:45:00	2013-04-14 04:15:00	2005-09-26 14:45:00	1900-08-19 12:00:00	swsws	82	2008-10-25 10:15:00	1997-03-01 09:00:00	2015-11-08 16:00:00	1995-09-23 19:30:00	2021-07-05 20:00:00	1900-09-03	wwwss	111	31.48	x		Winter						5004	0.317179		99.25
6007	2013-02-04 13:45:00	1977-11-08 19:45:00	2020-10-24 07:30:00	2002-03-10 22:00:00	2020-02-09 15:15:00	1900-10-06	wwwww	130	2016-05-05 12:30:00	1976-01-27 07:00:00	1995-10-25 01:30:00	1977-11-08 19:45:00	1972-12-04 21:45:00	1900-08-31	swwww	136	37.06	x		5/5/2016 is a false dip otherwise winter						6007	0.0980371		378.02
6008	1981-11-20 06:45:00	1992-01-06 11:15:00	2015-12-04 19:15:00	1990-12-28 12:00:00	1999-01-15 11:45:00	1900-08-19	wwwww	126	1980-07-27 09:00:00	2015-03-07 05:30:00	2006-12-01 01:15:00	1990-02-05 02:15:00	1994-03-05 01:00:00	1900-10-01	swwww	133	2.44	x		Too small						6008	0.058781		41.51
6011	2018-06-02 18:30:00	2012-06-28 18:30:00	2004-05-09 19:30:00	2006-09-01 08:00:00	2016-08-07 17:30:00	1900-08-10 12:00:00	sssss	84	2012-06-28 18:45:00	2016-08-07 17:30:00	2000-08-02 18:30:00	2018-06-02 18:30:00	2004-08-17 20:00:00	1900-08-05 12:00:00	sssss	104	69.83	ok		2012-06-28						6011	0.773482		90.28
6012	2009-07-06 18:45:00	2016-07-20 05:00:00	2011-06-07 20:45:00	2012-02-04 15:30:00	2021-02-15 04:30:00	1900-07-08 12:00:00	sssww	90	2016-07-20 05:00:00	2009-02-15 03:45:00	2011-01-13 09:15:00	2010-01-16 12:00:00	2014-02-26 14:45:00	1900-05-09 12:00:00	swwww	138	8.36	OK		6/7/09 OK but small						6012	0.253257		33.01
6013	2013-06-22 13:45:00	2020-06-26 15:30:00	2019-08-07 01:15:00	2021-07-04 15:30:00	2004-06-20 14:00:00	1900-07-21	sssss	64	2002-09-08 03:00:00	2019-08-07 01:15:00	1998-11-14 15:30:00	2009-07-02 15:30:00	2016-05-21 12:00:00	1900-07-13	sswss	88	3.15	x		Too small						6013	1.55172		2.03
7001	1994-08-04 02:15:00	2019-08-01 02:15:00	1986-08-14 07:15:00	2016-07-20 07:45:00	2005-08-31 22:30:00	1900-09-17	sssss	86	2014-08-11 07:45:00	2014-11-14 18:15:00	2005-08-31 22:30:00	1980-07-26 04:30:00	2019-08-01 02:15:00	1900-09-09 12:00:00	swsss	96	177.95	X	123.4	11/8/2014 not a wow but 1/8/2019 is						7001	0.705535		252.22
7002	1990-06-07 03:30:00	1980-07-26 09:00:00	2011-07-07 03:15:00	2005-09-01 03:15:00	2006-07-03 10:00:00	1900-09-21	sssss	89	1990-06-07 03:30:00	2014-08-17 21:30:00	1980-07-26 09:00:00	2016-01-26 16:30:00	1958-09-07 02:00:00	1900-09-18	sssws	97	209.02	209		7/6/90 Max h and Q same date OK						7002	0.610153		342.57
7003	2004-08-19 11:30:00	2009-07-24 14:45:00	2015-09-02 01:15:00	2002-07-30 18:45:00	2014-08-11 03:30:00	1900-08-26	sssss	68	2004-08-19 11:30:00	2014-08-11 07:00:00	2004-10-17 16:45:00	2009-11-01 23:15:00	1997-07-01 10:30:00	1900-09-02	sswws	73	9.43	ok		19/8/04 Max h an Q same date but small wow						7003	0.19945		47.28
7004	2006-08-01 21:45:00	2000-08-28 03:45:00	2011-07-16 16:45:00	1990-06-07 01:30:00	1981-09-20 08:15:00	1900-08-12	sssss	78	2006-08-01 21:45:00	1981-09-20 13:15:00	1981-10-03 03:30:00	1990-06-07 01:30:00	1990-10-28 19:30:00	1900-08-12 12:00:00	sswsw	97	23.96	24		1/8/06 Max h an Q same date OK						7004	0.246489		97.205
7005	1985-07-27 17:15:00	1999-06-28 16:45:00	1986-03-04 15:15:00	1983-05-07 19:00:00	1989-09-23 06:15:00	1900-08-11 12:00:00	sswss	84	2004-08-19 03:00:00	1985-12-01 08:00:00	2014-08-11 04:45:00	1984-09-23 18:30:00	1985-07-27 17:15:00	1900-09-03	swsss	84	12.65	x		19/8/2004 not a wow nor is 27/07/1985						7005	0.198618		63.69
7008	2008-08-03 21:45:00	2006-08-01 16:30:00	2009-07-06 23:15:00	2007-08-18 18:30:00	2004-12-14 20:15:00	1900-08-07	ssssw	76	2006-08-01 16:30:00	2008-08-03 21:45:00	2009-07-06 23:15:00	2007-08-18 18:30:00	1997-08-13 20:00:00	1900-08-10	sssss	79	8.14	x	7.44	3/8/08 is awow						7008	0.197047		41.31
7009	2019-08-07 02:15:00	2004-10-17 13:30:00	1999-06-28 18:30:00	2008-08-21 14:15:00	1999-11-28 19:45:00	1900-08-20 12:00:00	swssw	73	2004-10-17 13:30:00	2014-08-11 05:30:00	2002-11-16 13:00:00	2009-09-04 06:00:00	2020-12-08 04:15:00	1900-08-10 12:00:00	wswsw	97	4.26	x		Too small						7009	0.624633		6.82
7010	2011-07-16 20:45:00	2021-07-27 19:15:00	2009-07-14 22:45:00	2020-06-06 04:30:00	2014-08-17 20:15:00	1900-07-21 12:00:00	sssss	72	2011-07-16 20:45:00	2005-06-13 07:00:00	2021-07-27 19:15:00	2014-08-11 05:45:00	2014-10-08 04:15:00	1900-07-15	ssssw	84	3.46	x		Too small						7010	0.19116		18.1
7011	2020-12-31 08:15:00	2016-01-10 05:15:00	2013-06-23 19:30:00	2012-08-25 06:30:00	2014-08-11 02:15:00	1900-08-11	wwsss	109	2014-08-11 08:15:00	2017-06-07 01:30:00	2020-12-08 02:30:00	2016-01-10 05:15:00	2014-10-07 20:00:00	1900-08-26	sswww	109	1.71	x		Too small						7011	0.397674		4.3
7012	2015-09-01 21:15:00	2019-04-03 11:00:00	2017-06-07 00:15:00	2020-12-08 02:15:00	2021-11-01 06:30:00	1900-08-18	swsww	99	2017-06-07 03:00:00	2020-12-08 03:45:00	2019-04-03 11:00:00	2015-09-01 22:45:00	2016-08-03 15:45:00	1900-10-11 12:00:00	swwss	88	4.59	x		Too small						7012	0.555018		8.27
8002	2021-10-31 17:15:00	1987-09-24 21:45:00	1988-08-12 20:45:00	1989-09-20 08:00:00	1989-12-24 15:45:00	1900-09-27 12:00:00	wsssw	56	2019-12-23 03:45:00	2012-08-05 23:45:00	2019-07-24 10:00:00	1999-09-08 21:15:00	2015-07-17 09:45:00	1900-10-03	wssss	57	18.93	x		Rank 1 Q is winter; 5/8/2012 in not a wow						8002	0.0992034		190.82
8004	2011-07-09 19:15:00	2004-08-04 08:00:00	1980-06-06 19:15:00	1989-01-13 21:30:00	1993-10-01 10:30:00	1900-09-12 12:00:00	sssww	91	1980-06-06 19:15:00	1990-10-28 19:45:00	2015-07-17 10:30:00	2000-10-28 22:45:00	1989-01-13 21:30:00	1900-09-19 12:00:00	swsww	87	144.02	ok		1980-06-06						8004	0.684002		210.555
8005	2019-12-10 16:45:00	2011-08-10 16:30:00	2004-10-21 13:45:00	2005-10-30 20:45:00	2016-12-23 19:30:00	1900-10-22	wswww	102	2003-11-29 17:45:00	2019-12-10 16:45:00	2019-07-24 14:15:00	1990-02-05 10:15:00	2001-10-31 04:15:00	1900-09-18	wwsww	124	23.83	x		Winter						8005	0.111762		213.22
8006	2006-09-15 03:15:00	1982-08-07 03:15:00	1978-08-05 00:45:00	1980-06-06 22:15:00	1992-08-30 18:00:00	1900-08-31 12:00:00	sssss	83	1982-08-07 03:15:00	1980-06-06 22:15:00	1982-10-04 23:30:00	1975-11-16 09:45:00	1958-07-28 23:15:00	1900-09-07	sswws	83	151.87	ok		7/8/82 H and Q on same date OK						8006	0.30153		503.665
8007	2000-08-02 20:00:00	2001-01-22 20:30:00	2004-10-19 16:30:00	1991-09-21 17:00:00	2001-10-01 01:45:00	1900-09-21	swwsw	106	2021-11-09 13:15:00	1998-10-16 15:45:00	2009-07-02 19:30:00	2001-10-01 01:45:00	2011-10-29 18:15:00	1900-08-21 12:00:00	wwsww	124	15.64	x	10.52	small wow 2/8/2000 otherwise winter						8007	0.14321		109.21
8008	2005-01-01 14:15:00	2009-08-20 10:00:00	2018-09-18 00:30:00	2007-06-22 17:15:00	2015-06-01 21:15:00	1900-09-07 12:00:00	wssss	97	1993-01-17 09:00:00	2002-07-30 18:45:00	2009-08-20 10:00:00	2005-11-07 23:00:00	2005-01-01 14:15:00	1900-08-24	wssww	110	37.16	x	33.94	Rank 1 is winter; Rank 2: 6/6/80 is summer Ok Wow						8008	0.880152		42.22
8009	1981-09-18 10:15:00	2016-06-07 19:00:00	1990-06-07 01:30:00	2005-09-01 00:15:00	1998-08-10 22:00:00	1900-08-30	sssss	103	1981-09-20 10:30:00	1958-08-11 02:45:00	1985-12-01 07:15:00	1990-06-07 01:30:00	1963-03-05 22:15:00	1900-08-10 12:00:00	sswsw	115	25.79	x	15.42	20/9/81 not a wow but 18/0/81 a small WoW						8009	0.291495		88.475
8010	1989-01-13 22:00:00	1992-10-01 08:00:00	2012-10-12 16:15:00	2002-11-15 12:30:00	1988-08-13 01:00:00	1900-09-03	wwwws	76	1990-06-07 03:30:00	1989-01-13 22:00:00	1993-01-16 21:15:00	2015-12-05 05:45:00	2007-06-21 18:45:00	1900-09-01	swwws	109	17.97	x		7/6/90 not a wow;others winter						8010	0.0650851		276.1
8011	2016-06-24 16:45:00	2001-06-27 19:30:00	2002-08-06 13:45:00	2005-06-03 20:45:00	1999-07-10 15:45:00	1900-08-08	sssss	46	2002-08-06 13:45:00	2004-08-19 02:00:00	2014-08-11 06:00:00	2001-06-27 19:30:00	1999-07-10 15:45:00	1900-08-11 12:00:00	sssss	62	22.33	ok		6/8 02 is a wow						8011	0.669867		33.335
8013	2015-07-17 08:30:00	2005-08-24 07:15:00	2015-10-24 09:00:00	2020-07-27 17:45:00	2012-08-05 22:30:00	1900-08-26	sswss	51	2015-12-30 12:15:00	2016-12-23 19:30:00	2019-07-24 08:45:00	2015-07-17 08:30:00	2002-07-30 20:30:00	1900-08-29 12:00:00	wwsss	101	77.2	ok		2015-07-17						8013	0.690364		111.825
9001	2009-07-06 23:00:00	1977-08-26 14:30:00	2013-10-10 01:30:00	1992-08-30 17:00:00	2007-06-24 00:30:00	1900-08-26	sswss	78	1962-01-05 20:15:00	1970-08-16 14:00:00	2009-07-06 23:00:00	1972-05-27 16:15:00	1977-08-26 14:30:00	1900-08-26	wssss	79	37.88	ok		6/7/09 but 16/8/70 is not a wow						9001	0.292352		129.57
9002	2009-07-07 04:00:00	1984-09-24 00:30:00	1977-08-26 19:15:00	1967-10-04 13:45:00	1972-05-27 23:30:00	1900-08-21	sssws	72	2009-11-01 21:45:00	1960-08-25 21:45:00	1972-05-27 23:30:00	1970-08-16 18:30:00	1960-11-04 07:30:00	1900-08-26	wsssw	76	59.26	x	31.9	winter but 6/7.09 is a wow (25/8/60 not a wow)						9002	0.247164		239.76
9003	1996-01-01 09:00:00	2021-07-11 18:45:00	1991-11-04 04:45:00	2002-07-30 23:30:00	2004-08-18 16:15:00	1900-08-15	wswss	96	2009-11-01 22:30:00	2021-07-11 19:00:00	2017-10-22 08:30:00	2014-08-11 00:45:00	2005-11-25 11:15:00	1900-08-26 12:00:00	wswsw	95	15.9	x		11/7/21 npt a wow						9003	0.242193		65.65
9004	2002-07-30 22:15:00	2010-09-23 04:30:00	2016-07-20 20:00:00	2000-04-23 15:15:00	1993-09-11 14:30:00	1900-08-14	sssws	81	2002-07-30 22:15:00	2016-07-20 20:00:00	1998-04-04 09:00:00	2002-11-15 12:45:00	2007-11-22 12:00:00	1900-09-07	sswww	88	3.33	x		too small						9004	0.115545		28.82
9005	2009-07-06 19:00:00	2010-04-01 09:15:00	2015-07-17 10:00:00	2013-11-02 19:30:00	2004-08-18 13:15:00	1900-08-07	swsws	89	2009-07-06 19:00:00	2004-08-18 13:15:00	2021-08-10 19:45:00	1995-09-07 23:00:00	2001-08-19 22:45:00	1900-09-07	sssss	78	13.61	x		6/7/09 not a wow						9005	0.417485		32.6
9006	2021-05-10 17:45:00	2010-09-23 05:00:00	2002-07-19 10:15:00	2020-07-27 20:00:00	2014-08-10 23:15:00	1900-08-19 12:00:00	sssss	87	2010-09-23 09:00:00	1995-09-12 09:00:00	2014-08-10 23:45:00	2009-09-04 00:30:00	2014-10-08 03:30:00	1900-09-08	ssssw	82	14.66	x		23/9/2010 not a wow						9006	0.758603		19.325
9010	2009-07-06 21:30:00	2012-10-12 15:30:00	2015-07-17 14:15:00	2021-05-19 00:45:00	2013-10-09 23:30:00	1900-07-19	swssw	71	2009-07-06 21:45:00	2012-10-12 15:30:00	2015-12-30 12:15:00	2009-11-02 00:45:00	2021-08-07 07:30:00	1900-08-07	swwws	69	22.94	ok		6/7/09 Max H and Q on same date						9010	0.207733		110.43
10002	2014-01-19 18:00:00	1998-11-26 15:15:00	1995-09-12 05:30:00	2016-01-08 07:00:00	2009-11-02 05:15:00	1900-08-11	wwsww	118	2016-01-08 07:00:00	1991-10-20 09:00:00	2010-12-11 06:15:00	1996-09-26 09:00:00	2009-11-02 05:15:00	1900-09-19 12:00:00	wwwsw	123	40.16	x		winter						10002	0.80927		49.625
10003	2020-10-22 02:45:00	2017-08-18 18:00:00	1999-12-25 00:30:00	1985-08-30 09:45:00	1987-10-21 08:15:00	1900-10-21	wswsw	96	2016-01-08 00:30:00	1996-02-10 09:00:00	2020-10-22 06:15:00	2009-11-01 20:15:00	2008-04-08 15:45:00	1900-10-07 12:00:00	wwwww	110	11.83	x		winter						10003	0.198058		59.73
11001	2003-12-24 20:00:00	2007-06-24 07:15:00	2001-10-21 02:15:00	2012-10-12 19:15:00	2016-01-08 00:30:00	1900-08-09	wswww	75	2016-01-08 04:00:00	2012-09-25 19:45:00	2009-10-22 18:15:00	2003-12-24 20:00:00	2002-10-23 07:00:00	1900-08-12	wswww	94	12.76	x		winter						11001	0.0788994		161.725
11002	1973-12-03 09:45:00	1982-08-07 10:45:00	1999-07-11 00:30:00	1986-03-04 22:00:00	1979-01-15 00:15:00	1900-08-06 12:00:00	wssww	97	1973-12-03 09:45:00	1981-12-31 01:30:00	1979-01-15 00:15:00	1999-07-11 00:30:00	1984-09-24 01:30:00	1900-08-19 12:00:00	wwwwss	109	38.07	x		winter						11002	0.348451		109.255
11003	1982-08-07 06:15:00	1999-07-10 19:15:00	1995-12-30 19:15:00	1985-01-27 18:15:00	1984-09-23 21:45:00	1900-08-06 12:00:00	sswws	80	1995-12-30 19:15:00	1982-08-07 06:15:00	1999-07-10 19:15:00	2004-08-19 03:30:00	1985-01-27 18:15:00	1900-09-04	wsssw	88	29.36	x	25.59	30/12/95 I winter but 7/8/82 is a wow						11003	0.317388		92.505
11004	1990-11-18 03:00:00	2002-09-07 17:30:00	2013-11-03 06:45:00	2020-10-22 06:30:00	2010-11-19 06:15:00	1900-09-09	wswww	90	1995-09-08 09:00:00	2009-11-02 00:15:00	2016-01-08 00:30:00	1990-11-18 03:00:00	2015-07-07 16:45:00	1900-09-04	swwws	98	5.04	x		Too small						11004	0.204795		24.61
11006	2007-06-21 19:00:00	2011-06-21 04:45:00	2004-01-01 09:00:00	1999-07-10 14:45:00	2019-07-10 19:45:00	1900-07-22 12:00:00	sswss	84	2009-11-02 01:15:00	2021-02-21 00:30:00	1999-07-10 14:45:00	2007-06-22 19:00:00	2001-08-19 21:30:00	1900-08-04	wwsss	89	13.29	x		2/11/09 is winter; 10/7/99 not a wow and too small						11006	0.254403		52.24
12001	2007-10-28 12:30:00	1989-09-20 17:45:00	2019-07-24 20:00:00	1993-10-01 13:00:00	1990-01-10 18:45:00	1900-09-18	wssww	88	2015-12-30 14:30:00	1981-10-03 01:30:00	1989-09-20 17:45:00	2002-07-31 03:45:00	1990-01-10 18:45:00	1900-09-24	swwssw	93	176.58	x	107.75	20/9/89 is a wow						12001	0.387084		456.18
12002	1982-08-07 04:00:00	1993-10-01 15:30:00	1990-01-10 20:15:00	1989-09-20 19:30:00	2000-01-31 04:00:00	1900-09-10 12:00:00	swwsw	99	1982-09-25 02:30:00	1993-10-01 15:30:00	2002-07-31 05:30:00	2014-10-06 17:45:00	1992-02-27 20:45:00	1900-09-22 12:00:00	swsww	107	91.74	x		25/9/82 not a wow; 7/8/82not a wow						12002	0.166891		549.7
12003	1991-09-21 23:00:00	1990-09-07 00:15:00	1999-09-09 01:00:00	2020-07-27 21:15:00	2019-07-24 13:45:00	1900-08-25 12:00:00	sssss	90	1982-08-06 20:15:00	2021-02-20 20:00:00	2018-12-18 12:45:00	1990-09-07 00:15:00	2014-10-06 12:15:00	1900-09-08	swwsw	103	105.57	x	64	6/8/82 is not a wow but 219/91 and 7/9/90 (selected) are						12003	0.349633		301.945
12004	2000-07-29 16:00:00	2020-08-12 06:00:00	2004-08-04 04:30:00	1996-07-23 16:30:00	1999-05-12 14:00:00	1900-08-04	sssss	101	1995-09-09 22:15:00	1993-01-15 05:15:00	1998-06-07 14:00:00	1996-01-08 23:15:00	2002-07-31 00:30:00	1900-07-17	swsws	113	27.97	x	9.53	9/9/95 is not a wow; 7/6/98 is (but small)						12004	1.90531		14.68
12005	2001-07-03 21:15:00	2018-06-02 16:15:00	2007-06-08 00:30:00	2020-08-12 06:45:00	2021-08-06 10:30:00	1900-08-08	sssss	66	1999-09-20 23:15:00	2004-08-18 09:00:00	2007-06-08 00:30:00	2018-06-02 16:15:00	2001-07-03 21:15:00	1900-08-06	sssss	80	33.34	x	22.97	20/9/99 not a wow;18/8/2004 is						12005	0.464345		71.8
12006	2006-02-03 13:15:00	2001-10-14 21:00:00	2000-08-08 16:15:00	1991-06-30 18:15:00	1993-01-01 12:15:00	1900-07-24	wwssw	120	2001-10-14 21:00:00	2021-02-24 15:15:00	1993-01-15 09:00:00	1990-10-28 21:30:00	2015-07-17 09:00:00	1900-07-11	wwwws	123	30.67	x		winter						12006	0.526072		58.3
12007	2019-07-24 09:00:00	1999-09-08 19:30:00	1984-09-23 14:30:00	1991-09-21 17:00:00	1990-09-06 19:00:00	1900-09-01	sssss	99	2019-07-24 09:00:00	2015-07-17 07:30:00	1999-09-08 19:30:00	1988-10-07 13:45:00	2020-06-17 02:30:00	1900-09-10	sssws	112	46.84	ok		24/7/19 H and Q max on same day						12007	0.255747		183.15
12008	2000-07-30 16:45:00	2015-07-17 08:15:00	2003-04-22 05:00:00	1988-10-19 08:30:00	2011-10-25 12:15:00	1900-08-25 12:00:00	sswww	66	1987-07-11 17:30:00	2015-12-30 11:45:00	2015-07-07 18:15:00	1988-10-19 08:30:00	2012-08-16	1900-10-02 12:00:00	swsws	65	29.36	ok		11/7/87 is a possible wow						12008	0.215344		136.34
12009	1991-06-23 16:15:00	2004-08-18 07:15:00	2015-07-07 16:00:00	2012-08-27 15:15:00	2011-07-10 11:30:00	1900-09-11	sssss	58	2000-07-30 15:00:00	2015-07-07 16:45:00	2006-10-19 15:30:00	1991-06-23 16:15:00	1995-09-07 20:15:00	1900-10-04	sswss	62	17.62	x	15.1	2015-07-07						12009	0.477766		36.88
13001	1987-07-11 17:00:00	1991-06-23 20:00:00	2005-05-03 16:00:00	2019-08-09 16:45:00	2021-05-12 09:15:00	1900-09-15 12:00:00	sssss	106	2012-12-23 04:00:00	2010-11-19 10:15:00	1979-10-04 15:30:00	2009-11-01 23:30:00	2020-10-04 03:30:00	1900-09-05 12:00:00	wwwww	110	18.07	x		all winter						13001	0.503693		35.875
13002	2019-07-10 18:15:00	1993-07-17 14:30:00	1987-10-18 13:00:00	1987-07-11 19:00:00	2017-07-26 17:15:00	1900-08-28	sswss	94	1985-12-01 05:15:00	2019-07-10 18:15:00	1988-04-18 23:30:00	1984-11-10 03:30:00	1988-10-26 04:30:00	1900-08-04 12:00:00	wswww	103	7.69	x		too small						13002	0.221774		34.675
13004	2021-09-10 18:00:00	1998-06-26 20:15:00	2000-06-22 18:30:00	2010-09-07 16:00:00	2007-10-28 05:45:00	1900-08-23	ssssw	57	2015-07-17 06:30:00	2021-09-10 18:00:00	2005-06-04 14:00:00	2005-10-30 15:00:00	2004-08-19 12:15:00	1900-09-09	sssws	77	30.59	x	28.15	17/7/15 not a wow but 10/9.21 ok						13004	0.462574		66.13
13005	2002-10-22 08:45:00	1998-10-16 14:15:00	2019-08-09 16:30:00	1994-01-03 20:45:00	2012-11-22 14:15:00	1900-09-18 12:00:00	wwsww	110	2002-10-22 08:45:00	2020-10-22 04:30:00	2001-02-28 16:00:00	2004-10-21 11:00:00	2019-08-09 17:00:00	1900-06-13	wwwws	126	4.35	x		Too small						13005	0.173134		25.125
13007	1992-08-22 23:45:00	1997-11-18 08:45:00	2021-08-06 12:00:00	2010-09-07 18:30:00	2012-08-27 16:15:00	1900-09-07	swsss	95	2015-07-17 09:15:00	1997-11-18 08:45:00	2018-11-10 04:45:00	2010-10-01 17:00:00	2000-09-20 03:30:00	1900-09-20	swwws	98	79.44	x	36.03	17/7/2015 not a wow; 22/8/92 OK						13007	0.236559		335.815
13008	2020-08-12 10:30:00	2015-07-17 10:00:00	2017-09-28 07:30:00	2011-10-25 13:45:00	2009-04-08 09:15:00	1900-09-16	sssww	68	2015-07-17 10:00:00	2020-08-12 10:30:00	2012-08-27 16:45:00	1988-10-19 10:00:00	2017-09-28 07:30:00	1900-09-21	sssws	87	36.78	x	28	17/7/2015 not a wow; 12/8 20 ok						13008	0.277		132.78
13009	1992-08-22 21:45:00	2009-07-06 14:00:00	1994-10-20 10:15:00	2021-08-06 09:45:00	1990-06-06 22:15:00	1900-08-30	sswss	62	2015-07-17 07:30:00	1985-08-14 21:00:00	2009-07-06 14:00:00	2012-08-27 14:30:00	1992-08-22 21:45:00	1900-09-10	sssss	78	60.05	x	48.74	6/7/09 is a wow						13009	0.604946		99.265
13010	2007-03-07 05:30:00	2020-08-12 06:30:00	2011-08-06 23:30:00	2019-08-09 15:45:00	2005-01-08 08:00:00	1900-08-15 12:00:00	wsssw	84	2019-08-09 16:15:00	2005-01-08 08:00:00	2011-08-06 23:45:00	2007-03-07 05:30:00	2020-10-22 04:30:00	1900-08-16 12:00:00	swsww	125	2.05	x		too small						13010	0.184187		11.13
13012	1999-12-22 12:15:00	2015-12-30 08:15:00	2002-11-03 01:45:00	1997-11-18 14:15:00	2018-11-28 23:00:00	1900-08-31 12:00:00	wwwww	73	2015-12-30 13:15:00	2018-11-28 23:00:00	2015-07-17 15:00:00	2002-11-03 01:45:00	1997-11-18 14:15:00	1900-09-08	wwsww	124	16.47	x		Winter except 17/7/2015 not a wow						13012	0.229916		71.635
13017	2011-07-06 10:30:00	2019-08-09 14:30:00	2007-01-11 02:45:00	2005-01-08 07:00:00	2020-08-12 05:45:00	1900-09-02	sswws	94	2011-07-06 10:30:00	2020-10-03 19:00:00	2009-09-03 19:45:00	2009-11-01 16:15:00	2007-01-11 02:45:00	1900-08-09	swsww	123	5.47	x		Too small						13017	1.60882		3.4
14001	2002-07-31 01:30:00	2008-08-10 02:30:00	2000-10-09 18:00:00	1999-12-24 21:45:00	1995-11-15 10:30:00	1900-07-17 12:00:00	sswww	93	2009-07-06 11:30:00	2008-08-10 02:30:00	2002-07-31 01:30:00	2013-05-20 16:30:00	2009-11-01 15:30:00	1900-07-12 12:00:00	ssssw	103	6.05	x		Too small						14001	0.1305		46.36
14002	2021-07-28 00:15:00	1991-11-18 20:30:00	2002-07-30 23:15:00	2004-08-16 17:00:00	2008-08-13	1900-08-15 12:00:00	swsss	77	2021-07-28 00:15:00	2004-08-16 17:00:00	2019-08-10 22:45:00	2009-09-04 08:30:00	2002-07-30 23:15:00	1900-08-17	sssss	109	3.86	x		Too small						14002	0.210641		18.325
14005	1993-10-07 12:30:00	1998-04-03 11:45:00	1992-03-31 16:15:00	2009-11-01 17:45:00	2002-12-01 11:15:00	1900-10-11 12:00:00	wwwww	122	1993-10-07 12:30:00	1993-01-15 17:00:00	1992-04-01 04:15:00	2008-08-13 19:00:00	2012-12-21 04:15:00	1900-10-06	wwwsw	124	0.69	x		Too small						14005	0.1104		6.25
14009	2009-07-06 10:30:00	2016-08-03 07:00:00	2005-06-04 16:00:00	2005-10-24 13:00:00	2001-10-08 00:30:00	1900-08-17	sssww	103	2000-04-26 21:15:00	2005-10-24 13:00:00	1999-09-23 05:00:00	1993-01-15 09:45:00	2005-06-04 16:00:00	1900-08-26 12:00:00	wwsws	116	3.22	x		Too small						14009	0.264368		12.18
15003	2002-07-30 04:30:00	2010-09-29 16:15:00	2009-08-20 14:15:00	2005-11-11 12:00:00	1997-11-18 06:30:00	1900-09-21 12:00:00	sssww	92	2005-11-11 12:00:00	1993-01-17 06:15:00	1997-02-17 23:30:00	2003-11-29 18:30:00	2002-07-30 04:30:00	1900-09-25 12:00:00	wwwws	105	71.21	x		30/7/2002 not a wow						15003	0.0770046		924.75
15006	1962-09-30 10:30:00	2014-10-06 16:30:00	1952-11-07 00:45:00	1981-09-18 12:30:00	2000-09-20 08:45:00	1900-10-05	swwss	97	1993-01-17 13:30:00	2003-11-29 19:15:00	1990-01-10 15:15:00	2005-11-11 14:30:00	2006-12-13 18:45:00	1900-10-03	wwwww	94	67.16	x		winter						15006	0.0607447		1105.61
15007	2009-08-20 11:15:00	1997-11-18 03:15:00	1991-12-22 10:45:00	2004-10-21 11:00:00	2005-11-11 08:30:00	1900-08-23	swwww	102	2004-08-11 10:30:00	1993-01-16 23:00:00	2002-07-30 19:00:00	2015-07-17 07:30:00	2004-10-21 11:00:00	1900-09-20 12:00:00	swssw	119	29.03	x		No Summer Wow						15007	0.0739561		392.53
15010	2021-08-06 13:15:00	2007-10-28 07:00:00	2014-10-06 13:00:00	2009-06-17 14:45:00	2013-12-05 11:30:00	1900-09-21 12:00:00	swwsw	57	2020-08-12 06:15:00	2021-08-06 13:15:00	2021-10-31 16:30:00	2015-07-17 08:00:00	2007-10-28 07:00:00	1900-09-23 12:00:00	sswsw	65	25.8	x	21.79	12/8/20 n0t a wow; 6/8/21 ok						15010	0.20928		123.28
15011	2007-06-22 16:15:00	2015-11-08 15:00:00	2009-07-03 20:15:00	1994-08-23 10:15:00	2012-08-17 09:45:00	1900-07-23 12:00:00	swsss	84	2002-07-30 17:00:00	1997-02-19 16:45:00	2007-06-22 16:15:00	2004-08-09 11:45:00	2010-10-29 20:00:00	1900-08-23	swssw	109	56.7	x	35.49	30/7/02 not a wow; 22/6/07 ok						15011	0.251436		225.505
15012	2020-11-05 19:45:00	2000-02-27 06:45:00	2001-02-11 14:30:00	2015-12-30 04:00:00	1997-02-17 19:45:00	1900-10-16	wwwww	116	2006-11-20 01:00:00	1995-10-26 08:00:00	2001-10-15 19:00:00	2000-01-30 21:45:00	2008-03-08 13:30:00	1900-10-25	wwwww	121	251.49	x		All winter						15012	0.440106		571.43
15013	2006-09-01 12:30:00	2015-06-01 22:30:00	2021-03-10 01:15:00	1994-10-20 08:00:00	1993-10-01 12:15:00	1900-09-13	sswww	92	1993-10-01 12:15:00	2015-06-01 22:30:00	2006-11-19 22:30:00	2020-02-08 22:00:00	1993-01-15 09:30:00	1900-09-28	wswww	94	73.65	x	62.21	30/7/02 not a wow; 1/6/2015 ok						15013	0.590949		124.63
15014	2006-08-19 15:45:00	2009-06-13 22:00:00	2014-08-09 00:30:00	2017-06-21 21:45:00	2015-08-10 16:00:00	1900-08-13	sssss	71	2005-06-19 05:45:00	2015-08-10 16:15:00	2016-07-20 10:30:00	2012-08-15 22:00:00	2019-07-24 07:00:00	1900-09-03 12:00:00	sssss	73	28.51	ok		19/6/05 a wow						15014	0.491001		58.065
15015	2002-10-22 01:00:00	2006-09-01 08:00:00	2018-06-02 19:30:00	2016-07-20 10:45:00	2014-10-06 08:00:00	1900-09-01 12:00:00	wsssw	81	2001-12-03 23:15:00	2006-09-01 08:15:00	2006-11-19 21:00:00	2005-06-19 06:00:00	1999-09-20 18:00:00	1900-09-15 12:00:00	wswss	95	40.36	x	28.52	1/9/2006 is wow but split 1.23 - 18.3 - 46.82P						15015	0.475579		84.865
15016	2011-12-08 14:15:00	1993-01-15 19:00:00	1998-11-10 03:15:00	2015-11-11 17:30:00	1994-01-27 11:45:00	1900-07-21	wwwww	136	1993-01-15 19:00:00	2018-09-19 10:45:00	2008-01-08 20:45:00	2011-12-08 14:15:00	2015-12-30 08:45:00	1900-04-15	wswww	146	10.1	x		Witer and too small						15016	0.0490529		205.9
15021	2013-12-31 10:45:00	2000-09-20 14:00:00	2011-01-15 13:30:00	2014-11-07 11:45:00	2018-12-18 21:00:00	1900-09-04	wswww	118	2016-01-07 19:30:00	2013-12-31 10:45:00	2004-08-12 02:00:00	1999-02-05 11:00:00	2012-12-23 03:45:00	1900-04-23	wwsww	141	2.4	x		Too small						15021	0.254777		9.42
15023	2020-08-11 18:45:00	1996-01-01 19:45:00	2002-08-06 21:30:00	2007-07-01 19:00:00	2010-12-10 15:30:00	1900-09-01	swssw	89	2004-08-11 08:15:00	1996-01-01 19:45:00	2010-12-10 15:30:00	1997-02-19 15:15:00	2001-10-20 16:45:00	1900-08-05 12:00:00	swsws	112	81.89	x	10.15	11/8/04 not a wow; 11/8 20 a small wow; others winter						15023	0.65212		125.575
15024	1994-08-03 21:30:00	1997-11-16 16:00:00	1992-02-12 13:45:00	2002-07-30 15:30:00	2011-09-21 12:15:00	1900-08-07 12:00:00	swwss	73	2007-07-14 01:30:00	2004-08-18 17:15:00	1992-02-12 13:45:00	2002-07-30 15:30:00	1997-05-18 16:00:00	1900-09-04	sswss	98	15.19	x		no wow						15024	0.0834043		182.125
15025	2007-10-28 06:45:00	2005-06-19 09:30:00	2020-07-27 18:30:00	1995-10-03 03:00:00	2018-06-16 22:30:00	1900-08-19	wssws	79	2014-10-06 12:15:00	1995-10-03 03:00:00	2004-12-23 08:30:00	2007-11-28 20:00:00	2004-05-09 20:45:00	1900-09-05 12:00:00	wwwws	94	62.28	x	45.23	19/6/05 is a wow						15025	0.324367		192.005
15028	2013-05-03 17:45:00	2021-05-12 19:00:00	2015-07-17 05:45:00	2020-02-08 22:00:00	2008-12-12 21:30:00	1900-07-24	sssww	122	2004-08-11 11:15:00	1993-01-15 10:30:00	2005-01-08 09:30:00	2002-02-01 13:15:00	1999-12-25 01:30:00	1900-07-25 12:00:00	swwww	130	4.39	x		Too small						15028	0.157942		27.795
15030	1992-08-31 10:45:00	2020-10-04	2002-07-31 04:30:00	2001-01-22 18:15:00	2006-10-26 07:30:00	1900-08-29 12:00:00	swsww	119	2016-01-07 15:45:00	2020-10-04	1992-08-31 10:45:00	1994-01-03 21:45:00	1993-01-15 12:00:00	1900-06-23	wwsww	125	7.38	x		too small						15030	0.252567		29.22
15034	2009-07-02 19:30:00	2014-07-06 22:30:00	2005-09-01 00:15:00	2019-07-24 07:30:00	2018-09-16 06:00:00	1900-09-05	sssss	69	2002-07-30 20:00:00	2018-09-16 06:00:00	2010-10-29 21:15:00	2011-10-29 18:00:00	2015-12-22 09:15:00	1900-09-21	sswww	69	133.32	x	95.74	2/7/09 is wow; other not						15034	0.338862		393.435
15039	2014-07-06 21:00:00	2018-06-03 15:30:00	2002-08-06 20:00:00	2021-08-06 12:00:00	2005-06-19 06:00:00	1900-08-06	sssss	63	2019-07-24 07:15:00	2014-07-06 21:00:00	2015-08-10 17:00:00	2004-08-06 03:00:00	2005-06-19 06:00:00	1900-08-28 12:00:00	sssss	82	115.08	x	69.5	24/7/19 not a wow; 6/7/14 is						15039	0.767891		149.865
15046	2019-07-11 21:30:00	2011-07-16 16:15:00	2012-08-21 18:15:00	2015-07-17 04:30:00	2010-07-14 23:45:00	1900-07-17	sssss	88	2015-12-04 23:30:00	2019-07-11 21:30:00	2011-01-15 13:45:00	2013-01-29 00:30:00	2020-02-15 18:30:00	1900-07-14	wswww	121	1.53	x		Too small						15046	0.241325		6.34
16001	2004-09-13 03:30:00	2012-08-04 22:00:00	2020-09-30 15:45:00	2019-02-08 11:15:00	2015-07-17 06:45:00	1900-08-04	sssws	77	1991-01-01 19:45:00	2005-06-19 09:30:00	2004-09-13 03:30:00	1992-05-12 01:30:00	2012-08-04 22:00:00	1900-08-05	wssss	77	29.11	x		19/6/05 and 13/8/04 not wow						16001	0.126351		230.39
16003	2001-07-04 01:15:00	2012-08-04 18:15:00	1992-08-03 02:45:00	1994-08-23 07:45:00	2014-08-02 20:30:00	1900-08-03	sssss	91	2012-08-04 18:30:00	2001-07-04 01:15:00	2015-11-08 15:00:00	2002-02-01 09:15:00	2015-07-17 03:15:00	1900-08-23	sswws	91	104.55	ok		Wow over 30 m split 1.29 - 56.30 - 160.88 - 172.36 (P). 6/7/01 also wow with rise of 96.96						16003	0.640507		163.23
16004	1998-10-21 00:15:00	2015-07-17 08:45:00	2008-12-13 01:45:00	1993-03-29 22:15:00	2002-10-12 05:45:00	1900-08-20	wswww	86	2020-08-12 02:15:00	1999-11-28 11:30:00	1998-10-21 00:15:00	2000-10-29 13:00:00	2006-12-13 19:30:00	1900-08-15	swwww	121	18.86	x		12/8/20 not a wow						16004	0.0690716		273.05
16007	2001-09-30 23:45:00	2009-07-28 23:30:00	1994-10-23 04:45:00	2015-07-17 05:15:00	2008-08-09 22:00:00	1900-09-13 12:00:00	sswss	93	2002-09-10 00:15:00	2020-08-12 03:45:00	2008-08-09 22:00:00	2001-09-30 23:45:00	2016-01-26 11:15:00	1900-08-11 12:00:00	ssssw	112	9.12	x		too small						16007	0.304254		29.975
17001	2016-04-01 19:15:00	2002-07-30 18:00:00	2004-08-06 03:30:00	2005-09-23 08:45:00	2007-06-20 10:15:00	1900-08-02	wssss	98	2013-04-17 15:15:00	2011-02-03 20:45:00	2011-10-17 15:45:00	2006-12-13 19:45:00	1998-10-21 02:45:00	1900-08-10	wwwww	114	23.28	x		all winter						17001	0.333333		69.84
17003	2001-07-04 01:00:00	2018-06-02 17:15:00	2011-07-06 06:15:00	1999-05-12 19:45:00	2021-07-03 18:00:00	1900-07-19	sssss	43	2001-07-04 01:00:00	1999-05-12 19:45:00	2002-08-07 03:00:00	2018-06-02 17:15:00	2005-06-30 18:30:00	1900-07-19	sssss	53	3.98	x		Too small						17003	0.19358		20.56
17004	2011-02-07 12:00:00	2010-07-21 05:00:00	2008-08-10 01:00:00	2012-01-04 23:30:00	2012-10-17 13:45:00	1900-07-16	wssww	86	2011-02-07 12:30:00	1999-12-03 10:30:00	2006-03-21 12:30:00	2012-01-04 23:30:00	1999-09-29 06:15:00	1900-07-20	wwwws	113	3.06	x		Too small						17004	0.147151		20.795
17005	2019-08-04 17:15:00	1997-08-13 19:00:00	2008-08-01 10:00:00	1993-07-16 17:00:00	2020-08-12 05:00:00	1900-08-01	sssss	66	2020-08-12 05:00:00	1997-08-13 19:00:00	2000-10-29 05:30:00	1999-12-03 07:15:00	2008-08-01 10:00:00	1900-08-10	sswws	106	38.28	x		12/8/20 not a wow; also 13/8/97						17005	0.494829		77.36
17008	2020-08-12 01:30:00	2008-04-28 10:30:00	1998-03-29 22:00:00	2015-07-17 06:45:00	1997-02-27 16:45:00	1900-07-29	swwsw	96	2006-12-13 17:00:00	2015-12-05 08:15:00	1998-11-22 03:00:00	2008-01-25 03:15:00	1998-02-11 09:00:00	1900-09-10	wwwww	123	4.41	x		Too small						17008	0.242308		18.2
17015	1992-11-01 03:45:00	2007-06-23 17:45:00	1997-09-16 13:00:00	2003-05-24 17:00:00	1998-07-06 22:15:00	1900-07-26	wssss	82	1998-07-06 22:15:00	1993-01-23 20:45:00	2002-09-10 01:30:00	1997-09-16 13:00:00	2000-09-22 10:00:00	1900-09-16	swsss	93	4.2	x		Too small						17015	0.409756		10.25
17018	2000-12-12 07:00:00	2014-10-28 11:00:00	2013-10-22 03:15:00	2019-08-09 14:30:00	2002-09-08 12:00:00	1900-10-22	wwwss	125	2000-12-12 07:00:00	2009-11-01 15:30:00	2013-10-22 03:30:00	2014-10-28 11:00:00	2002-09-08 12:00:00	1900-10-22	wwwwss	126	1.25	x		Too small						17018	0.316456		3.95
18001	2003-03-02 07:15:00	1997-05-04 11:45:00	2015-07-17 05:45:00	2011-09-25 20:00:00	2015-10-28 16:45:00	1900-08-10	wsssw	88	2003-03-02 07:15:00	2015-07-17 05:45:00	1994-12-28 18:45:00	2004-10-21 08:15:00	2015-10-28 16:45:00	1900-09-08	wswww	97	11.65	x		17/7/2015 not a wow						18001	0.170521		68.32
18002	2002-07-30 20:00:00	2004-08-09 18:00:00	2009-09-10 09:30:00	1992-10-01 08:45:00	2020-08-04 18:30:00	1900-09-10	sssws	90	2004-08-09 18:00:00	2002-07-30 20:45:00	2020-08-04 18:30:00	2012-08-29 18:00:00	2009-11-19 08:45:00	1900-08-30	ssssw	116	4.1	x		too small						18002	0.0670702		61.13
18003	2001-07-04 02:30:00	2004-08-18 18:30:00	1992-08-03 04:00:00	2019-08-09 14:00:00	2016-09-13 04:30:00	1900-08-09	sssss	82	2004-08-18 18:45:00	2001-07-04 02:30:00	2010-09-09 12:15:00	2005-11-11 06:15:00	2008-08-01 11:00:00	1900-08-15	sssws	97	93.55	x	62.28	18/8/04 not a wow;4/7 2001 OK but split over 45 m						18003	0.403215		232.01
18005	2011-09-25 21:00:00	1998-09-01 15:30:00	1998-12-08 05:00:00	2012-08-29 15:45:00	2008-08-01 12:00:00	1900-07-17	sswss	72	2011-09-25 21:00:00	2012-08-29 15:45:00	2006-06-20 22:15:00	1998-09-01 15:30:00	2016-04-01 19:30:00	1900-08-10	ssssw	88	20.33	ok		25/9/11 ok						18005	0.242197		83.94
18008	2016-01-29 06:45:00	2020-01-07 20:15:00	2021-10-26 22:30:00	2008-12-19 16:45:00	1993-01-17 02:45:00	1900-10-05	wwwww	137	1993-01-17 03:00:00	2016-01-29 06:45:00	2000-06-13 06:15:00	2013-05-09 08:45:00	2011-12-08 10:00:00	1900-06-14	wwssw	133	4.27	x		too small						18008	0.0461721		92.48
18010	2018-09-18 23:30:00	2017-09-25 09:00:00	2018-10-10 10:00:00	2019-10-07 21:30:00	2012-12-28 12:00:00	1900-09-16	sswww	100	2018-10-10 10:00:00	2018-09-18 23:30:00	2017-09-25 09:00:00	2008-02-21 22:45:00	2006-09-07 11:00:00	1900-09-07	wssws	106	36.68	x		18/9/2018 not a wow						18010	0.325408		112.72
18011	2012-07-18 10:15:00	2004-10-21 08:30:00	2002-07-30 19:00:00	2018-01-03 16:45:00	1993-01-15 09:30:00	1900-08-05	swsww	84	2004-08-18 19:30:00	2008-08-01 11:45:00	2002-07-30 19:00:00	2001-07-04 03:45:00	2016-03-01 02:15:00	1900-08-04	ssssw	102	32.95	x		18/8 04 not a wow; also 1/8/08						18011	0.0983964		334.87
18013	1998-07-31 22:30:00	1996-03-12 00:45:00	2011-02-04 20:30:00	2004-10-25 01:00:00	2020-08-12 07:45:00	1900-08-13	swwws	70	2011-02-04 20:30:00	2004-10-25 01:00:00	2020-08-12 07:45:00	1999-11-28 11:45:00	1993-01-23 21:15:00	1900-09-24	wwsww	95	8.93	x		Too small and winter						18013	0.520093		17.17
18014	2009-03-10 12:45:00	2004-01-11 06:15:00	2013-12-14 12:45:00	2002-07-30 19:00:00	1996-08-23 18:30:00	1900-07-02 12:00:00	wwwss	108	1993-01-16 12:30:00	2016-01-26 09:30:00	2008-01-05 21:15:00	1995-01-31 05:00:00	2002-07-30 19:00:00	1900-07-28 12:00:00	wwwws	127	2.22	x		Too small						18014	0.142445		15.585
18020	2018-09-16 10:30:00	1997-12-10 14:00:00	2019-09-25 09:30:00	2009-07-03 15:15:00	2000-03-04 10:45:00	1900-08-17 12:00:00	swssw	93	2002-07-30 15:00:00	2019-08-09 12:45:00	2006-12-13 11:15:00	1998-10-20 20:15:00	1993-01-09 04:30:00	1900-08-01	sswww	108	0.66	x		Too small						18020	0.517647		1.275
18021	2019-02-01 03:45:00	2018-09-16 10:30:00	2005-01-19 11:15:00	2007-03-11 22:15:00	2002-07-30 13:45:00	1900-07-14	wswws	116	2002-07-30 13:45:00	1993-01-09 04:15:00	2012-11-19 06:45:00	2005-06-19 06:15:00	2009-09-08 07:15:00	1900-09-04 12:00:00	swwss	110	0.75	x		Too small						18021	0.350467		2.14
18022	2006-09-28 20:30:00	2008-01-07 16:45:00	2018-11-15 17:45:00	2002-12-04 10:30:00	2006-12-13 20:15:00	1900-10-29	swwww	106	2006-12-13 20:15:00	2002-02-07 11:15:00	2008-10-25 16:15:00	2010-04-07 00:45:00	2002-12-04 10:30:00	1900-10-23	wwwww	132	3.24	x		Too small						18022	0.308866		10.49
19001	2002-07-30 16:15:00	2000-08-02 18:15:00	2021-07-04 18:30:00	1997-08-13 23:30:00	2010-06-05 22:00:00	1900-07-30	sssss	91	2002-07-30 17:00:00	2008-08-10 01:45:00	1994-03-14 07:30:00	1997-08-13 23:30:00	2018-06-20 02:45:00	1900-08-11	sswss	110	20.01	x		30/7/02 not a wow: also 10/8/08						19001	0.151373		132.19
19004	2016-06-07 12:30:00	2009-07-06 14:30:00	2019-06-24 16:15:00	2010-09-23 03:00:00	2012-08-29 14:45:00	1900-07-16	sssss	76	2016-06-07 12:30:00	2006-05-22 22:45:00	2012-08-29 14:45:00	2000-08-20 17:00:00	2010-09-23 03:00:00	1900-07-06	sssss	90	9.6	ok		Small but distinct wow						19004	0.396203		24.23
19005	2021-07-04 15:45:00	2000-07-28 18:45:00	2009-06-14 16:45:00	2013-07-23 19:00:00	2002-07-30 13:00:00	1900-07-29	sssss	76	2002-07-30 14:45:00	2021-07-04 15:45:00	2008-08-10	2000-08-02 16:00:00	2009-06-14 16:45:00	1900-08-10	sssss	107	24.32	x	20.81	30/7/02 not a wow; but 4/7/21 is						19005	0.262635		92.6
19006	2004-08-11 22:00:00	2000-08-02 17:00:00	2009-07-16 19:30:00	2014-05-25 12:45:00	2007-07-23 21:45:00	1900-07-23	sssss	74	2004-08-11 22:00:00	2011-07-16 19:00:00	2019-06-24 15:30:00	2000-08-02 17:15:00	2021-07-04 16:45:00	1900-07-16	sssss	91	17.68	ok		H and Q both show wow						19006	0.581388		30.41
19007	2004-08-09 22:00:00	2012-08-29 17:45:00	2011-07-16 20:45:00	2014-06-04 17:15:00	1993-10-06 04:45:00	1900-07-16	ssssw	73	2012-08-29 17:45:00	2004-08-09 22:00:00	2000-04-26 22:15:00	1993-10-07 17:00:00	2001-02-06 18:45:00	1900-07-16	sswww	113	13.51	x		29/8/12 not a wow; nor 9/8/04						19007	0.174053		77.62
19010	2011-07-08 13:45:00	2018-07-28 10:00:00	2013-07-27 16:45:00	2016-06-10 04:45:00	2000-07-27 15:00:00	1900-07-28	sssss	42	2021-07-04 17:00:00	2011-07-08 13:45:00	2014-05-25 12:30:00	2020-08-11 22:00:00	2012-08-29 14:00:00	1900-07-26	sssss	62	7.23	x		too small						19010	1.55987		4.635
19012	2000-08-02 17:00:00	2011-07-16 18:15:00	2004-08-11 21:00:00	2007-07-01 12:15:00	2005-03-30 13:45:00	1900-07-03 12:00:00	ssssw	84	2011-07-16 18:15:00	2004-08-11 21:00:00	2019-06-24 14:30:00	2000-08-02 17:15:00	2007-07-01 12:15:00	1900-08-07 12:00:00	sssss	113	14.33	ok		16/7/21 ok but with init shoulder						19012	0.626722		22.865
19014	2013-07-23 19:30:00	2010-06-05 17:45:00	2016-07-20 08:30:00	2006-07-26 06:15:00	2002-07-30 13:45:00	1900-07-27 12:00:00	sssss	43	2002-07-30 13:45:00	2008-08-10 00:15:00	2013-07-23 19:30:00	2020-08-27 17:30:00	2014-05-25 13:15:00	1900-08-06 12:00:00	sssss	58	8.15	x		30/7/02 not a wow; otherwise too small						19014	0.768868		10.6
19017	2021-07-04 16:15:00	2016-06-25 00:45:00	2006-07-02 14:30:00	2000-08-02 16:30:00	1995-07-14 13:30:00	1900-07-29 12:00:00	sssss	52	2021-07-04 16:15:00	2019-06-24 14:00:00	2000-08-02 16:30:00	2016-06-25 00:45:00	2011-07-08 14:15:00	1900-07-11	sssss	83	7.61	ok		30/7/02 Q rise small but include as H rise > 0.6m						19017	0.608557		12.505
19020	1998-09-02 16:45:00	2021-08-09 13:30:00	2019-08-07 18:30:00	2008-08-19 22:00:00	2018-09-19 11:00:00	1900-08-04	sssss	64	1997-08-13 16:30:00	2020-08-04 15:30:00	2003-09-21 23:30:00	1998-09-02 16:45:00	2010-10-30 01:15:00	1900-08-10	ssssw	83	3.71	x		Too small						19020	0.240987		15.395
19021	2012-08-05 12:00:00	2013-05-20 18:15:00	2018-06-19 22:30:00	2006-07-02 14:45:00	2008-07-29 21:00:00	1900-07-16	sssss	57	1993-10-07 17:45:00	2000-04-26 20:00:00	2014-12-22 03:30:00	2011-10-17 15:45:00	2014-06-04 16:15:00	1900-08-10	wwwws	90	15.54	x		no wow						19021	0.434564		35.76
20001	2020-08-12 02:15:00	2008-04-28 00:15:00	2000-08-28 11:45:00	2021-10-05 17:45:00	2014-06-04 18:15:00	1900-09-03	swsws	106	2020-08-12 02:15:00	1993-10-06 07:00:00	2014-06-04 18:30:00	2021-10-05 19:15:00	2000-10-09 22:00:00	1900-09-23	swsww	87	13.77	ok		H and Q coincide						20001	0.207849		66.25
20002	2011-10-17 17:45:00	2007-07-22 03:30:00	2011-02-07 08:15:00	2015-12-03 21:15:00	2008-01-10 13:00:00	1900-08-01 12:00:00	wswww	88	2011-10-17 17:30:00	2018-01-24 07:15:00	2007-07-22 03:30:00	2021-10-28 07:45:00	2019-10-19 08:15:00	1900-09-08	wwsww	109	0.25	x		too small						20002	0.0848896		2.945
20003	2020-08-11 22:15:00	2008-04-27 20:30:00	2000-08-28 10:15:00	2005-10-30 14:30:00	1998-04-06 21:45:00	1900-09-03	swsww	84	2020-08-11 22:15:00	2008-04-27 20:30:00	1993-10-06 06:30:00	2012-09-26 10:30:00	2000-08-28 10:15:00	1900-09-03	swwss	113	11.45	x		11/8/20 not a wow						20003	0.325192		35.21
20007	2011-07-09 06:30:00	2000-11-06 17:00:00	2013-05-20 20:15:00	2000-08-28 08:30:00	2016-07-20 21:15:00	1900-08-29	swsss	90	2000-11-06 17:00:00	2008-08-07 01:00:00	2010-01-16 09:00:00	2020-12-04 19:00:00	2011-07-09 06:30:00	1900-08-31	wswws	96	15.06	x		9/7/11 not a wow						20007	0.829295		18.16
21003	1959-07-27 14:15:00	2004-08-09 04:00:00	1970-09-08 14:15:00	1972-05-26 03:15:00	1961-01-27 13:15:00	1900-08-18 12:00:00	ssssw	86	1979-01-07 12:30:00	1965-11-01 00:30:00	1962-08-03 19:00:00	1959-07-27 14:15:00	1982-12-19 14:45:00	1900-09-27	wwssw	96	29.58	x		27/7/59 not a wow; nor 3/8/62						21003	0.164493		179.825
21005	2004-08-09 02:45:00	2018-09-19 14:00:00	1996-10-24 23:30:00	2015-06-01 21:45:00	1998-08-17 04:30:00	1900-08-14	sswss	77	2004-08-09 02:45:00	2000-09-11 11:45:00	1987-10-18 14:45:00	2021-02-20 23:00:00	2018-09-19 14:00:00	1900-08-17	sswss	106	24.16	ok		H and Q both show wow						21005	0.164432		146.93
21006	2004-08-04 04:30:00	1986-07-31 01:00:00	1987-07-10 17:30:00	1988-07-10 09:45:00	1989-09-18 20:15:00	1900-07-22	sssss	78	2004-08-04 04:30:00	2002-03-04 06:45:00	2003-05-30 16:15:00	2007-02-27 09:45:00	2000-09-11 10:00:00	1900-08-04	swsws	118	127.27	x		4/8/04 is spurious spike; 30/5/03 not a wow						21006	0.295276		431.02
21007	1967-07-14 15:45:00	1963-03-05 19:45:00	2008-05-10 18:45:00	2020-03-03 17:15:00	1983-10-04 07:45:00	1900-08-06 12:00:00	swsww	84	2003-05-30 16:45:00	1963-03-05 19:45:00	1976-01-02 20:15:00	1967-07-14 15:45:00	1975-05-13 19:45:00	1900-08-14 12:00:00	swwss	111	51.44	x	38.64	20/5/03 not a wow but 14/7/67 ok						21007	0.229009		224.62
21008	2005-06-28 04:00:00	2013-04-14 12:15:00	2009-03-08 03:00:00	2007-06-16 22:15:00	2016-12-23 17:00:00	1900-08-20	swwsw	108	2005-06-28 04:00:00	1991-02-24 03:00:00	2020-02-15 23:15:00	2007-06-16 22:15:00	2016-12-23 17:00:00	1900-03-10	swwsw	128	57.87	x		28/6/05 is a false spike; 16/6/07 not a wow						21008	0.148434		389.87
21009	1985-12-21 09:30:00	2001-03-07 12:45:00	2011-10-18 01:30:00	1982-12-19 17:45:00	2016-12-23 22:15:00	1900-09-19	wwwww	106	1985-12-21 09:30:00	1982-01-11 11:30:00	1959-10-27 12:15:00	1962-08-04 06:45:00	1985-07-27 02:30:00	1900-10-11	wwwss	128	196.91	x		4/8/62 not a wow						21009	0.234256		840.575
21011	2008-05-10 17:30:00	2003-05-30 15:45:00	1997-06-13 16:15:00	2007-06-22 18:00:00	2004-08-09 17:15:00	1900-08-06	sssss	74	2003-05-30 15:45:00	2008-05-10 17:30:00	2005-01-08 06:45:00	2015-12-30 12:00:00	2009-11-19 20:45:00	1900-07-11 12:00:00	sswww	134	40.59	ok		30/5/03 is a wow; 10/5 08 also with ror 38.26						21011	0.462933		87.68
21012	2000-07-09 18:30:00	1988-07-10 07:30:00	2013-04-14 08:15:00	2002-08-30 15:15:00	2004-08-09 17:30:00	1900-08-15	sswss	66	2007-06-16 18:15:00	2013-04-14 08:15:00	2000-07-09 18:30:00	2004-08-09 17:45:00	2016-01-27 09:15:00	1900-08-18	swssw	115	37.86	ok		16/6/07 is a wow; 4/7/00 also ok with ror 34.59						21012	0.181079		209.08
21013	2002-01-03 16:45:00	1972-12-12 02:15:00	2012-08-29 15:00:00	1988-07-22 04:15:00	1974-01-05 17:15:00	1900-07-30	wwssw	92	1984-11-03 21:45:00	1972-12-12 02:15:00	2012-08-29 15:00:00	2002-01-03 16:45:00	1986-03-04 19:45:00	1900-09-24	wwsww	116	23.97	x		winter						21013	0.450903		53.16
21014	2004-08-09	2011-05-07 02:30:00	1996-07-03 11:30:00	2002-08-07 08:30:00	1997-10-10 04:15:00	1900-07-26	ssssw	48	2004-08-09	2015-12-30 08:45:00	1987-10-18 06:45:00	2013-12-30 10:45:00	1996-10-24 21:15:00	1900-08-15	swwww	123	25.02	ok		H and Q both have wow						21014	0.223692		111.85
21015	2009-06-14 22:30:00	2002-10-20 19:00:00	1990-09-24 16:45:00	2021-10-05 15:15:00	1992-08-30 11:45:00	1900-08-29	swsws	56	2002-10-20 19:00:00	1990-10-06 20:15:00	1990-09-24 16:45:00	2009-06-14 22:30:00	1992-08-30 11:45:00	1900-09-14	wwsss	75	22.82	x	14.41	24/9/90 ok						21015	0.365881		62.37
21016	1986-06-17 14:15:00	2000-08-28 10:30:00	1987-08-17 17:30:00	2019-07-11 17:00:00	1988-04-18 20:45:00	1900-08-03	ssssw	100	1987-08-17 17:30:00	2000-08-28 10:30:00	1984-11-03 13:15:00	1986-06-17 14:15:00	2021-12-04 22:00:00	1900-08-18	sswsw	111	14.49	x	10.54	17/8/87 not a wow; 17/6/86 a small wow						21016	0.396281		36.565
21017	2017-05-27 16:15:00	2008-08-01 06:00:00	2018-06-02 15:15:00	2007-07-18 15:00:00	2002-05-13 18:45:00	1900-08-06	sssss	75	2017-05-27 16:15:00	2008-08-01 06:00:00	2005-10-11 20:00:00	2007-07-18 15:00:00	2009-07-29 00:30:00	1900-09-11	sswss	96	42.14	ok		H and Q coincide as wow						21017	0.578687		72.82
21018	2021-11-10 12:30:00	2003-05-30 16:30:00	1998-07-31 21:30:00	1999-11-05 10:30:00	2001-08-20 12:30:00	1900-08-09	wssws	89	2021-11-10 12:30:00	2003-05-30 16:30:00	2001-08-20 12:30:00	1998-07-31 21:30:00	1999-11-05 11:00:00	1900-08-10	wsssw	112	18.16	x		30/5/03 not a wow and too small						21018	0.516643		35.15
21019	2000-07-29 19:15:00	2006-08-18 16:30:00	2007-10-28 06:45:00	1992-08-13	2001-09-30 23:45:00	1900-08-15	sswss	68	2005-10-11 22:15:00	2000-09-11 10:00:00	2015-12-30 09:15:00	2011-12-08 11:00:00	2018-01-24 06:00:00	1900-07-20	wswww	123	5.9	x		Too small						21019	0.226923		26
21020	2008-05-10 15:30:00	1998-07-31 17:45:00	2007-07-03 19:15:00	2012-08-29 11:30:00	2016-12-23 13:00:00	1900-07-13	ssssw	66	2008-05-10 15:45:00	1997-02-19 16:30:00	2002-03-10 12:00:00	1986-10-04 19:15:00	2015-12-30 07:45:00	1900-08-10	swwww	108	14.66	ok		10/5/08 a amall wow with shoulder						21020	0.219363		66.83
21021	2005-04-18 17:30:00	1989-01-18 08:15:00	1985-07-26 19:45:00	1997-12-18 23:00:00	1982-12-19 14:00:00	1900-08-25 12:00:00	wwsww	108	2005-04-18 17:30:00	1982-12-19 14:00:00	1989-01-18 08:15:00	1985-07-26 19:45:00	1997-12-11 11:00:00	1900-08-25 12:00:00	wwwsw	124	180.16	x		26/7/85 npt a wow						21021	0.242318		743.485
21023	2007-12-22 14:15:00	1990-10-06 20:45:00	1994-12-08 14:30:00	2010-12-10 20:00:00	1993-12-29 18:00:00	1900-07-30	wwwww	124	2010-12-10 20:00:00	2000-11-07 02:45:00	2016-01-27 15:45:00	2007-12-22 14:15:00	1993-01-24 05:00:00	1900-05-02	wwwww	135	4.37	x		Too small						21023	0.116502		37.51
21024	2000-07-09 20:15:00	2020-07-27 19:30:00	2015-07-17 11:45:00	2019-07-31 14:00:00	2011-09-06 09:00:00	1900-08-13	sssss	59	2016-06-07 15:45:00	2012-08-05 08:00:00	2011-09-06 09:00:00	2014-08-08 21:00:00	2016-12-23 15:00:00	1900-08-08	ssssw	59	21.4	x		No Q for 9/7/00 starts 2011						21024	0.316521		67.61
21025	2003-05-30 22:00:00	1993-10-03 01:45:00	2004-08-04 09:30:00	2013-04-14 13:15:00	2015-05-03 17:45:00	1900-08-05	swsws	89	2003-05-30 22:00:00	2012-08-05 08:30:00	2007-06-22 17:45:00	2013-04-14 13:15:00	1993-10-03 01:45:00	1900-07-21	sssww	103	15.73	ok		H and Q show wow						21025	0.292325		53.81
21026	1992-08-03 02:45:00	2018-08-12 22:15:00	1988-07-10 03:15:00	1997-07-03 17:30:00	2010-12-10 17:15:00	1900-08-14	ssssw	99	2005-10-30 12:45:00	2008-08-06 22:45:00	2015-11-08 15:45:00	1992-08-03 02:45:00	2004-08-09 15:15:00	1900-08-17	wswss	127	16.42	x		6/8/08 not a wow but 3/8/92 is ok						21026	0.278069		59.05
21027	2013-05-21 02:30:00	2002-11-02 23:45:00	2002-07-31 02:30:00	1990-10-06 17:45:00	2014-06-13 17:00:00	1900-07-17	swsws	82	2002-11-02 23:45:00	2002-07-31 02:30:00	1987-06-06 06:00:00	2012-06-16 20:00:00	1998-11-03 03:00:00	1900-08-03 12:00:00	wsssw	108	9.87	x		Too small						21027	0.238752		41.34
77002	2019-08-06 06:00:00	2009-07-15 23:15:00	2002-07-30 17:30:00	1996-10-12 06:30:00	1995-10-03 06:30:00	1900-08-02	sssww	85	2002-07-30 17:30:00	2005-10-11 22:30:00	1995-10-03 06:30:00	2002-10-27 07:45:00	1991-07-20 18:15:00	1900-08-24	swwws	115	130.02	ok		30/7/02 ha 7.8 - 19.18 - 149.2 - and peak in 45 m						77002	0.349094		372.45
77003	1993-11-09 17:45:00	2002-08-02 14:30:00	1997-11-18 11:00:00	2012-08-04 17:15:00	2019-07-27 16:30:00	1900-08-10	wswss	94	2002-08-02 14:30:00	1988-07-22 05:15:00	2004-08-09 17:45:00	2008-08-01 09:30:00	2000-07-09 20:45:00	1900-08-05	sssss	115	103	ok		2/8/02 has 7.0 - 9.4 - 113.2 and p in 1 hr						77003	0.339441		303.44
77004	2002-09-07 07:15:00	2010-08-10 13:45:00	1995-10-03 06:00:00	2009-07-27 07:30:00	1989-09-21 07:15:00	1900-08-14	sswss	73	2007-06-28 19:30:00	2004-08-08 23:30:00	2002-08-02 15:15:00	2000-08-18 02:00:00	2011-07-16 09:00:00	1900-08-19	sssss	94	14.29	ok		2007-06-28						77004	0.36786		38.8463
78003	1989-08-21 01:00:00	2016-12-23 15:00:00	1990-10-03 00:15:00	2005-10-24 11:45:00	2000-10-25 00:15:00	1900-07-31	swwww	73	2013-04-14 12:30:00	1999-07-10 18:15:00	2015-06-01 22:00:00	2007-10-28 11:45:00	2004-08-18 20:00:00	1900-09-06	wssws	109	48.2	x		21/8/89 not a wow; nor 10/7/99						78003	0.152987		315.06
78004	1989-05-03 10:15:00	2002-05-13 20:45:00	1996-05-22 17:00:00	1998-09-08 04:15:00	2005-04-06 04:00:00	1900-06-19	ssssw	87	1992-01-01 18:15:00	1989-05-03 10:15:00	2015-06-01 20:00:00	2014-03-20 14:45:00	2000-08-14 00:45:00	1900-07-23	wssws	101	60.29	x		3/5/89 is a spurious spike 1.4-41.76-1.51; 1/6/2015 not a wow						78004	0.687692		87.67
78005	2012-08-27 15:15:00	2004-08-08 23:30:00	2015-06-01 21:00:00	1990-06-06 18:15:00	1994-09-06 13:15:00	1900-08-04	sssss	81	1992-08-03 06:00:00	2012-08-27 15:15:00	1990-06-06 18:30:00	2015-06-01 21:00:00	2004-08-08 23:30:00	1900-08-02	sssss	93	16.12	ok		27/8/12 not a wow; but 3/8/92 is a wow						78005	0.130094		123.91
78006	2002-07-30 18:15:00	1995-01-31 07:00:00	2015-06-01 19:15:00	1988-02-01 11:30:00	2005-08-24 07:15:00	1900-08-09	swsws	104	1995-01-31 07:00:00	1997-11-18 06:45:00	1991-11-10 20:30:00	1996-10-27 05:15:00	1995-10-24 21:15:00	1900-10-21	wwwww	125	50.61	x		All winter						78006	0.344497		146.91
79002	2001-05-14 14:30:00	1999-01-13 11:45:00	2000-02-10 11:00:00	1988-12-18 20:30:00	1963-09-26 04:45:00	1900-09-21 12:00:00	swwws	118	2000-02-10 11:00:00	1967-02-27 14:15:00	1999-01-13 11:45:00	1972-12-11 18:45:00	1962-08-03 17:30:00	1900-10-01	wwwws	121	137.76	x		Winter events						79002	0.302899		454.805
79003	1993-03-18 14:30:00	1988-12-18 16:45:00	1988-02-01 09:00:00	2005-11-07 20:45:00	2015-06-01 18:45:00	1900-08-10	wwwws	109	1993-03-31 13:30:00	2013-12-30 11:00:00	1988-02-01 09:00:00	1988-12-18 16:45:00	2015-12-30 12:00:00	1900-08-22	wwwww	119	48.4	x		All winter						79003	0.684389		70.72
79004	2007-06-12 15:30:00	2008-05-10 18:45:00	2015-07-17 05:15:00	2013-10-03 00:45:00	1988-07-10 03:45:00	1900-08-04	sssws	75	1990-06-06 16:45:00	2001-07-03 23:45:00	2015-07-17 05:15:00	2014-03-20 11:45:00	2007-06-12 15:30:00	1900-08-23	sssws	100	41.68	x	34.01	12/6/07 is a wow; others not						79004	0.280032		148.84
79005	1979-10-19 08:45:00	1982-11-12 09:15:00	1970-08-16 10:00:00	1971-10-17 13:45:00	1987-04-10 19:00:00	1900-08-16	wwsww	80	1982-11-12 09:30:00	2018-08-12 22:30:00	1985-09-21 07:30:00	2020-06-16 21:45:00	1990-08-29 14:45:00	1900-09-20 12:00:00	wssss	100	28.48	x		No summer wow						79005	0.262561		108.47
79006	1968-09-12 09:45:00	2001-07-04 00:45:00	1972-11-09 15:00:00	1982-10-26 13:30:00	2015-06-01 20:00:00	1900-09-15 12:00:00	sswws	93	2001-07-04 01:00:00	1985-09-21 07:45:00	2018-11-29 12:15:00	2003-01-17 05:30:00	1967-10-20 09:15:00	1900-10-04 12:00:00	sswww	114	81.27	ok		4/7/02 has 4.94 - 5.74 - 51.8 - 133.98 with Pk in 1 hr						79006	0.231019		351.79
80001	1999-07-10 21:30:00	1995-03-01 06:15:00	2003-01-17 07:15:00	1992-03-09 12:15:00	1995-10-13 00:15:00	1900-06-22	swwww	95	1999-07-10 21:30:00	2015-12-30 12:00:00	2001-07-04 02:45:00	2019-12-10 18:00:00	2011-01-11 04:00:00	1900-07-10	swsww	121	17.15	ok		H and Q are wow						80001	0.182992		93.72
80002	1994-04-05 04:45:00	1988-02-24 15:30:00	1989-02-12 06:15:00	1990-08-23 05:30:00	1990-11-03 06:15:00	1900-06-05	wwwsw	117	1994-04-05 04:45:00	2007-12-27 08:30:00	2009-11-05 17:00:00	2008-12-05 08:30:00	2013-11-20 07:45:00	1900-08-04	wwwww	121	64.37	x		All winter						80002	0.250097		257.38
80003	2006-07-31 18:45:00	2012-08-04 14:30:00	2007-07-19 13:45:00	2000-09-11 04:30:00	1991-09-21 14:15:00	1900-09-07	sssss	53	2012-08-04 14:30:00	2006-07-31 18:45:00	1992-08-02 23:45:00	1991-09-21 14:15:00	2002-09-07 14:30:00	1900-08-27	sssss	60	3.5	x		Too small						80003	0.516224		6.78
80004	2010-01-16 03:30:00	2003-01-12 19:00:00	2020-08-12 18:15:00	2012-08-04 14:45:00	2002-09-07 14:15:00	1900-08-24	wwsss	89	2002-09-07 14:45:00	2010-01-16 03:30:00	2003-01-12 19:00:00	1998-09-01 09:45:00	1988-09-04 23:00:00	1900-09-01	swwss	74	2.3	x		Too small						80004	0.646067		3.56
80005	2001-02-10 15:30:00	2012-08-29 04:45:00	2010-10-02 12:45:00	2014-08-06 18:15:00	1994-09-06 07:15:00	1900-08-26 12:00:00	wswss	67	2005-11-07 20:15:00	1994-09-06 07:15:00	2010-10-02 12:45:00	2001-02-10 15:30:00	2012-08-04 15:00:00	1900-08-18	wswws	75	1.78	x		Too small						80005	0.414435		4.295
80006	1996-02-16 13:30:00	1998-10-17 09:45:00	2013-12-30 02:00:00	2015-12-30 02:00:00	2012-11-19 05:45:00	1900-08-14	wwwww	130	1996-02-16 13:30:00	2015-12-30 05:45:00	2009-04-27 05:30:00	1998-10-17 09:45:00	1999-12-03 03:45:00	1900-10-03	wwwww	127	0.76	x		Too small						80006	0.115152		6.6
81002	1993-06-26 21:15:00	1979-09-01 23:15:00	1983-10-04 01:00:00	2011-08-10 08:15:00	1980-07-27 04:15:00	1900-08-01	sswss	58	1993-06-26 21:15:00	1982-10-01 20:45:00	1980-07-27 04:15:00	1978-08-02 21:30:00	1966-09-02 06:30:00	1900-08-27 12:00:00	swsss	77	68.99	x	39.69	26/6/93 not a wow, but 2/8/78 is						81002	0.343465		200.865
81003	1999-11-05 02:30:00	1995-07-11 20:00:00	2011-07-07 06:15:00	2003-11-02 01:15:00	2021-05-03 15:15:00	1900-08-30	wssws	83	1998-10-24 10:15:00	1994-10-23 01:45:00	1988-08-18 02:15:00	2021-05-03 15:15:00	1999-11-05 02:30:00	1900-10-22	wwssw	94	20.07	x		18/8 88 not a wow						81003	0.155244		129.28
81004	1991-11-01 06:00:00	1988-01-19 05:00:00	1989-08-11 10:15:00	1990-07-19 14:30:00	1990-10-02 18:45:00	1900-10-11	wwssw	104	1991-11-01 06:00:00	1994-12-08 07:15:00	2001-01-05 10:30:00	2016-11-12 14:15:00	2012-11-19 19:00:00	1900-10-25	wwwww	119	13.51	x		All winter						81004	0.127972		105.57
81006	1991-08-09 05:30:00	1988-10-18 14:00:00	1991-10-16 06:00:00	2003-09-22 03:45:00	2005-09-19 17:45:00	1900-09-12	swwss	74	1993-05-17 15:15:00	2000-10-25 06:45:00	1991-10-16 06:00:00	1988-10-18 14:00:00	2020-06-17 20:00:00	1900-09-22	swwws	78	39.53	x		17/5 93 not a wow						81006	0.285704		138.36
81007	2015-07-17 03:00:00	1998-09-01 09:45:00	1992-09-12 22:00:00	2006-09-29 14:00:00	1994-07-10 00:15:00	1900-08-29	sssss	73	1992-09-12 22:00:00	2015-07-17 03:00:00	1998-08-03 10:30:00	2002-10-24 19:15:00	2004-03-19 07:30:00	1900-08-21	sssww	87	12.5	x		17/7/15 not a wow						81007	0.175735		71.13
82001	1996-04-03 09:30:00	1980-07-26 03:30:00	1988-08-30 09:00:00	1980-11-14 09:00:00	2000-09-11 09:30:00	1900-08-20	wssws	112	1996-04-03 09:30:00	1985-09-21 04:30:00	2000-09-11 09:30:00	1980-11-14 09:00:00	1980-07-26 03:30:00	1900-08-31	wssws	118	45.58	x	32.91	21/9/85 nt wow but 11/9/00 possible						82001	0.528954		86.17
82002	1994-08-01 20:45:00	2000-09-11 08:45:00	1999-05-12 16:45:00	1981-09-17 23:45:00	1985-12-31 17:15:00	1900-09-17	ssssw	85	2000-09-11 08:45:00	1994-08-01 20:45:00	1981-09-20 00:45:00	1982-12-19 02:45:00	1985-12-31 17:15:00	1900-09-12	sssww	96	21.57	x	19.29	11/9/00 not a wow but 1/8/94 ok						82002	0.355589		60.66
82003	1980-07-26 04:30:00	1999-06-19 20:15:00	1991-08-09 08:15:00	2007-09-16 12:00:00	2015-06-28 11:30:00	1900-08-14	sssss	65	1979-12-19 13:30:00	2001-11-21 16:00:00	1983-10-12 09:30:00	2012-06-23 09:30:00	1982-10-17 13:30:00	1900-08-14	wwwsw	98	73.88	x	53.13	26/7 80 is a good wow						82003	0.367453		201.06
83003	2001-07-04 01:45:00	1971-09-01 15:45:00	1993-06-09 18:45:00	2004-08-09 03:45:00	1999-05-12 16:45:00	1900-07-22	sssss	101	2001-07-04 01:45:00	1994-10-23 05:15:00	2010-01-15 22:30:00	1990-05-16 17:30:00	1971-09-01 15:45:00	1900-08-04	swwss	99	53.98	ok		H and Q are wow						83003	0.519788		103.85
83004	2008-01-26 15:30:00	2011-08-26 17:30:00	2001-07-04 01:30:00	1983-03-05 19:45:00	1988-07-22 02:30:00	1900-08-24	wssws	87	1985-09-21 02:30:00	1982-09-27 17:30:00	1980-07-26 22:30:00	2001-07-04 01:45:00	1982-11-05 22:45:00	1900-10-08	ssssw	89	47.27	x	17.7	21/9/85 not a wow; nor 27/9/82; nor 26/7/80; 4/7/01 ok						83004	0.36564		129.28
83005	1999-11-28 09:00:00	2015-07-17 07:30:00	2012-08-06 16:15:00	1986-05-10 05:45:00	2016-05-02 10:45:00	1900-08-19	wssss	77	1986-05-10 05:45:00	1982-11-23 10:45:00	2012-08-06 16:15:00	1999-11-28 09:00:00	1991-11-11 09:00:00	1900-09-16	swsww	91	54.68	x	45.87	6/8/12 a wow with shoulder pk after 2 h						83005	0.271837		201.15
83006	2001-07-04 05:30:00	2008-08-01 12:30:00	1987-06-06 08:45:00	2012-06-22 13:30:00	2007-07-26 10:15:00	1900-08-24	sssss	70	2001-07-04 05:30:00	2007-07-26 10:15:00	2007-10-04 01:45:00	2000-09-20 06:00:00	2012-06-22 13:30:00	1900-10-03	sswss	76	114.6	ok		4/7/01 is a definite wow						83006	0.404675		283.19
83007	2005-09-23 08:30:00	2014-05-19 21:45:00	1992-08-30 14:30:00	2004-05-10 00:30:00	2010-01-15 20:45:00	1900-06-29	ssssw	88	1992-08-30 14:30:00	2005-09-23 08:30:00	2019-07-31 18:45:00	2014-05-19 21:45:00	2011-02-07 07:15:00	1900-06-19	sssss	111	7.41	x		too small						83007	0.282286		26.25
83008	2005-05-19 13:15:00	2012-08-06 18:00:00	2016-11-16 08:15:00	2007-09-16 12:30:00	2004-04-15 11:15:00	1900-08-20 12:00:00	sswsw	96	1985-10-01 08:00:00	2000-07-29 21:15:00	1999-03-28 18:30:00	2005-05-19 13:15:00	2012-08-06 18:15:00	1900-08-17	wswss	103	26.68	x	17.78	29/7/00 not a wow; 19/5/05 is a wow						83008	0.469512		56.825
83009	2020-09-30 11:15:00	1991-08-08 07:00:00	2019-08-30 02:45:00	2016-03-01 01:15:00	2005-09-19 16:30:00	1900-08-15	sssws	77	1987-12-27 13:45:00	1983-10-15 08:00:00	1986-08-13 23:15:00	2020-09-30 11:15:00	2016-03-01 01:15:00	1900-08-14	wwssw	93	34.66	x	27.56	13/8/86 not a wow but 30/9/20 is a wow						83009	0.278662		124.38
83010	2003-05-30 15:30:00	1995-09-13 16:30:00	1997-09-14 04:30:00	2002-08-06 23:45:00	2001-07-04 00:30:00	1900-09-09	sssss	79	1987-12-26 06:45:00	2007-12-02 00:30:00	1990-03-06 03:45:00	2003-09-22 00:15:00	1985-09-21 03:30:00	1900-09-21	wwwss	102	19.8	x		22/9/03 not a wow						83010	0.34191		57.91
83011	2000-09-11 07:45:00	2001-07-03 23:15:00	2021-12-08 12:45:00	1999-05-12 12:45:00	2017-10-04 09:45:00	1900-10-09	sswsw	67	2010-01-16 08:30:00	2000-10-25 02:15:00	1994-01-14 01:00:00	2000-09-20 05:30:00	1994-12-08 07:15:00	1900-10-09	wwwsw	87	11.14	x		winter or too small						83011	0.359123		31.02
83013	2010-12-28 10:00:00	2012-08-06 14:30:00	2005-05-26 09:30:00	2015-11-12 18:00:00	2009-11-25 13:15:00	1900-10-08	wssww	74	2012-08-06 14:30:00	2005-05-26 09:30:00	2010-12-28 10:00:00	2009-11-25 13:15:00	2007-07-18 17:30:00	1900-09-30	sswws	101	25.97	ok		6/8/12 a wow						83013	0.270099		96.15
84001	1960-07-12 13:30:00	1985-10-01 05:45:00	1956-08-13 09:15:00	1966-09-04 06:30:00	2000-09-11 13:30:00	1900-09-04 12:00:00	swsss	105	1985-10-01 05:45:00	1960-07-12 13:30:00	1956-08-13 09:15:00	1994-02-01 11:15:00	1983-10-18 10:15:00	1900-08-12 12:00:00	wssww	112	40.2	x		12/7/60 spurious rise nd fall; 13/8/56 not a wow						84001	0.520692		77.205
84003	1999-07-21 13:00:00	1972-01-24 11:00:00	1975-12-02 16:15:00	1968-10-03 10:00:00	1973-02-20 17:15:00	1900-08-16	swwww	110	1999-07-21 13:00:00	2008-02-05 15:15:00	2009-05-04 08:15:00	1972-01-24 11:00:00	2006-01-22 22:30:00	1900-09-11	swsww	115	118.6	x		21/7/99 not a wow						84003	0.418505		283.39
84004	1995-03-25 09:00:00	2017-11-07 15:30:00	2010-01-16 04:00:00	1982-12-19 09:15:00	1979-01-15 23:15:00	1900-10-03	wwwww	107	1995-03-25 09:00:00	2013-12-30 20:00:00	1981-09-20 08:30:00	1982-02-09 00:30:00	1979-11-25 18:00:00	1900-09-20	wwsww	136	22.04	x		winter						84004	0.0983007		224.21
84005	1987-08-20 21:30:00	1985-09-21 04:00:00	2009-05-06 23:45:00	1973-12-11 11:45:00	1995-10-22 11:15:00	1900-09-10	sssww	101	1985-09-21 04:00:00	1973-12-11 11:45:00	1982-12-19 07:45:00	1987-08-20 21:30:00	1991-12-22 08:15:00	1900-09-11 12:00:00	swwsw	112	57.18	x		20/8 87 not a wow;nor 21/9/85						84005	0.148235		385.74
84006	1976-05-22 03:00:00	1981-09-18 03:00:00	2020-08-04 13:00:00	2021-09-30 08:15:00	2009-09-08 07:15:00	1900-06-01 12:00:00	sssss	67	1981-09-18 03:00:00	1976-05-22 03:15:00	1982-09-27 15:30:00	1999-04-20 09:00:00	2020-08-04 14:15:00	1900-06-26 12:00:00	sssws	78	4.37	x		Too small						84006	0.252382		17.315
84008	2011-08-26 16:00:00	2004-08-08 22:00:00	2020-06-10 16:15:00	1994-07-31 19:15:00	2016-07-20 09:45:00	1900-07-31	sssss	89	2008-09-02 21:15:00	2004-12-14 12:30:00	2012-08-04 19:45:00	2006-05-04 22:00:00	1994-02-01 07:15:00	1900-09-20	swssw	114	12.32	ok		Small wow 3.65 - 15.97 - 16.3 p						84008	0.306697		40.17
84009	2001-07-04 00:15:00	1978-06-22 20:15:00	2007-07-18 18:00:00	2018-06-01 16:00:00	1999-07-10 19:15:00	1900-08-05	sssss	87	2001-07-04 00:15:00	2007-07-18 18:00:00	1982-09-27 14:15:00	1982-12-19 04:15:00	2000-09-11 09:45:00	1900-08-20	sssws	104	34.67	ok		4/7/01 a wow 2.77-37.44 - 57.04 p in 1 hr						84009	0.981319		35.33
84011	2008-07-31 04:00:00	1994-07-31 21:00:00	2014-05-20	1988-10-19 04:15:00	1981-09-17 03:45:00	1900-08-05	sssws	90	1981-01-01	1999-11-26 12:15:00	1983-02-04 18:30:00	1980-09-07 09:45:00	1986-08-14 02:45:00	1900-08-09	wwwss	106	49.44	x		3/7/08 is a wow 0.84 - 18.65 - 21.05 p in 1 hr						84011	0.722807		68.4
84012	1994-12-28 14:00:00	1985-09-30 23:45:00	1990-02-06 09:45:00	1981-09-20 04:30:00	1989-03-19 13:30:00	1900-09-20	wswsw	116	1994-12-28 14:00:00	1981-09-20 04:30:00	1981-10-01 09:00:00	1985-09-30 23:45:00	1979-12-26 23:45:00	1900-08-05	wswsw	135	38.98	x		30/9/85 and 20/9/81 not wows						84012	0.377421		103.28
84013	1995-03-25 09:00:00	1981-01-18 00:30:00	1982-12-19 07:30:00	1987-12-26 14:15:00	1985-10-01 04:45:00	1900-09-13	wwwww	105	1981-01-18 00:30:00	1992-11-02 10:00:00	1995-03-25 09:00:00	1989-09-04 11:45:00	1985-10-01 04:45:00	1900-10-11	wwwsw	108	286.06	x		4/9/89 not a wow; others winter						84013	0.625719		457.17
84014	1993-07-08 18:15:00	1979-03-25 09:00:00	1997-04-24 02:00:00	1984-10-04 02:30:00	1989-09-22 09:00:00	1900-08-05	swwws	86	1994-03-03 06:00:00	2002-08-07 01:45:00	1984-01-13 03:30:00	1980-11-20 16:15:00	1979-03-08 09:00:00	1900-09-04	wswww	105	41.41	x	25.77	7/8/02 possible but 8/7/93 good wow 1.94- 27.2 36.2						84014	0.254127		162.95
84016	2002-07-30 16:15:00	2005-06-09 08:30:00	2001-07-04	1997-09-16 11:15:00	1988-08-18 15:30:00	1900-08-01	sssss	91	2002-07-30 16:15:00	1988-08-18 15:30:00	1997-09-16 11:15:00	2012-06-22 13:45:00	2005-06-09 08:30:00	1900-08-14	sssss	105	8.59	ok		wow but small						84016	0.445308		19.29
84017	2008-01-13 09:00:00	1979-12-27 12:45:00	2006-09-20 09:45:00	2005-04-06 14:45:00	2015-10-24 05:45:00	1900-08-07	wwsww	91	2008-01-13 09:00:00	1979-12-27 12:45:00	1991-06-14 09:45:00	1987-08-16 05:00:00	1982-12-14 10:00:00	1900-09-08	wwssw	107	21.44	x		14/6/91 not a wow and very small						84017	0.62199		34.47
84018	1995-03-25 09:00:00	1995-11-16 02:15:00	1988-07-22 10:30:00	2012-01-05 00:15:00	2007-01-03 15:30:00	1900-08-24 12:00:00	wwsww	139	1995-03-25 09:00:00	1992-05-13 00:45:00	2012-01-05 00:15:00	2012-11-22 19:15:00	1995-11-16 02:15:00	1900-03-28	wswww	142	43.07	x		no summer wow						84018	0.173788		247.83
84019	2001-07-03 22:45:00	2005-06-30 17:00:00	2020-08-12 05:15:00	2016-07-20 08:45:00	1995-07-14 12:30:00	1900-08-06	sssss	60	2000-09-12 08:45:00	2001-07-03 22:45:00	1992-05-21 08:00:00	2003-11-29 19:15:00	2020-08-12 05:15:00	1900-08-06	sssws	95	13.3	x		3/7/01 a small wow 0.57 - 10.65 - 18.14 p in 2 h 31.1						84019	0.322034		41.3
84020	2019-07-31 20:00:00	2015-10-06 10:30:00	2007-06-22 19:15:00	2009-05-09 14:00:00	2002-08-15 04:00:00	1900-08-26	swsss	68	2002-07-30 16:45:00	1991-01-01 16:45:00	1984-10-29 10:00:00	1986-08-16 03:00:00	2009-05-09 14:00:00	1900-09-20	swwss	77	25.64	x		30/7/02 not a wow; 31/7/19 ok but small 0.48 - 10.49 - p in 1 hr						84020	0.495363		51.76
84022	1992-11-12 10:45:00	2020-06-17 22:00:00	2000-08-09 15:30:00	1994-08-24 18:30:00	1988-08-18 06:00:00	1900-08-09	wssss	80	2007-06-22 17:45:00	2010-12-28 13:00:00	1988-08-18 06:00:00	2010-01-15 19:30:00	1999-05-12 17:15:00	1900-08-05	swsws	108	14.1	x		22/6/07 not a wow otherwise too small						84022	0.208549		67.61
84023	1991-08-09 04:00:00	2000-08-02 16:45:00	1989-10-31 07:45:00	2003-01-26 05:00:00	1998-04-29 21:00:00	1900-08-09	sswww	81	2019-08-31 10:00:00	2005-06-30 17:15:00	1988-08-18 16:00:00	1993-03-17 04:00:00	1992-08-12 23:15:00	1900-08-07	sssws	86	1.58	x		Too small						84023	0.17713		8.92
84025	2000-08-02 15:45:00	2001-07-04 01:15:00	2010-12-28 06:30:00	2002-07-30 16:00:00	2016-07-20 10:30:00	1900-08-14	sswss	67	2010-12-28 06:30:00	1986-12-30 11:45:00	2002-07-30 16:00:00	1988-11-30 01:45:00	2001-07-04 01:15:00	1900-08-14	wwsws	100	4.54	x		Too small						84025	0.175765		25.83
84026	2021-07-04 14:00:00	1980-07-26 01:15:00	2004-08-17 14:30:00	2011-07-17 17:30:00	2008-07-03 15:30:00	1900-08-14	sssss	71	1998-09-02 17:30:00	2002-07-30 15:30:00	2000-09-24 17:30:00	1987-08-16	2011-07-17 17:30:00	1900-08-15	sssss	91	6.41	x		Too small						84026	0.286929		22.34
84029	2003-05-30 14:30:00	1992-08-30 14:30:00	1993-09-10 19:30:00	2002-07-30 16:15:00	2015-02-28 18:15:00	1900-08-06	ssssw	94	2002-07-30 16:30:00	2003-05-30 14:45:00	2000-09-20 04:30:00	2011-10-17 15:00:00	2016-01-10 18:15:00	1900-09-17	sssww	124	20.61	x		30/7/02 and 30/5/03 not wow						84029	1.10155		18.71
84035	2011-08-26 14:45:00	1997-07-13 15:45:00	2016-07-20 08:15:00	2019-08-03 18:15:00	2000-09-01 15:15:00	1900-07-27	sssss	50	2001-07-03 23:45:00	1997-07-13 15:45:00	1991-07-08 12:30:00	1994-11-14 15:30:00	2006-08-01 17:30:00	1900-08-03	sssws	105	9.45	x	7.31	3/7/01 not a wow but 13/7 97 ok but small; 0.27 - 7.58 - 9.1p						84035	0.471439		20.045
84037	2010-01-16 07:30:00	1989-09-24 15:15:00	2021-05-13 17:00:00	2001-07-04 02:30:00	1994-10-23 02:45:00	1900-07-11	wsssw	115	2010-01-16 07:30:00	2001-07-04 02:30:00	2013-12-30 08:00:00	2002-02-22 06:00:00	2015-01-15 03:45:00	1900-07-14 12:00:00	wswww	128	38.86	x		4/7/01 not a wow; 24/9/89 false spike						84037	0.776036		50.075
84040	2010-12-29 18:30:00	2015-06-01 20:15:00	2007-10-28 05:15:00	2017-11-07 07:30:00	2020-08-25 14:00:00	1900-08-25	wswws	86	2015-12-30 09:45:00	2015-06-01 20:15:00	2006-11-19 21:15:00	2010-12-29 18:30:00	2009-11-19 17:45:00	1900-09-07 12:00:00	wswww	140	14.38	x		1/6/15 not a wow;otherwise winter						84040	0.100852		142.585
85001	1990-07-17 05:45:00	1981-09-18 08:00:00	1978-10-03 13:15:00	1978-04-17 17:30:00	1980-05-30 14:45:00	1900-08-01	sswws	74	1992-03-18 16:00:00	1990-07-17 05:45:00	1982-07-01	2009-07-21 12:15:00	2004-03-19 04:15:00	1900-08-07	wsssw	81	96.04	x	49.5	17/7/90 is false spike; 1/7/82 is a wow, 9.27-58.8P - 57.9						85001	0.748792		128.26
85002	1982-09-10 11:15:00	1985-10-01 03:15:00	1986-12-05 01:45:00	1988-10-19 04:30:00	1981-09-23 16:45:00	1900-08-22	swwws	109	1982-09-10 11:15:00	1986-12-05 01:45:00	1993-05-18 09:30:00	1981-05-01	1985-10-01 03:15:00	1900-08-23	swssw	125	45.76	ok		10/9/82 is a wow 8.79 - 54.55 - 58.2 p in 2 hr 60.1						85002	0.360202		127.04
85003	2008-07-30 01:30:00	2005-08-31 19:00:00	2015-08-10 14:30:00	2000-09-06 05:00:00	1991-07-01 14:00:00	1900-08-19	sssss	76	2012-06-28 17:15:00	2006-09-29 16:00:00	2019-08-04 18:15:00	2005-08-31 19:00:00	2000-09-06 05:00:00	1900-09-10	sssss	89	68.37	x	55.1	28/6/12 not a wow; 29/9/06 ? 6.1 - 9.5 - 32.1 - 98.5 - 146.8; 31/8/05 better 3.1 - 7.4 - 62.5						85003	0.426141		160.44
85004	2013-07-03 09:00:00	2010-09-11 06:15:00	2011-07-07 17:30:00	1994-08-24 16:15:00	1986-03-08 16:15:00	1900-08-01	ssssw	77	2000-06-08 10:45:00	1998-02-11 09:00:00	1994-08-24 16:15:00	1986-01-10 03:00:00	2000-10-17 23:45:00	1900-09-10	swsww	83	43.36	x	30.82	8/6/00 not a wow but 24/8/94 ok						85004	0.794285		54.59
88001	2010-09-11 06:00:00	2018-12-18 10:30:00	2000-09-11 07:45:00	1996-02-05 07:45:00	2010-10-01 11:00:00	1900-10-11	swsww	108	2018-12-18 10:30:00	1997-11-17 23:30:00	2012-11-19 02:15:00	1998-10-24 11:00:00	2019-10-06 01:15:00	1900-10-26	wwwww	98	15.93	x		All winter						88001	0.278302		57.24
89002	2001-07-06 17:30:00	2004-05-10 17:15:00	1999-05-21 07:00:00	1995-03-23 09:00:00	1996-07-03 10:15:00	1900-07-04	sssws	93	2001-07-06 17:30:00	1995-03-23 09:00:00	1996-07-03 10:15:00	2004-05-10 17:15:00	2015-08-10 14:15:00	1900-09-11	swsss	101	24.27	ok		6/7 01 is a wow; 0.88 - 25.15 - 29.36 - 30.66 p						89002	0.265449		91.43
89003	2018-12-18 15:15:00	1994-08-03 20:00:00	1995-03-23 09:00:00	1996-10-04 10:30:00	2015-08-10 14:30:00	1900-08-08 12:00:00	wswws	102	1996-10-04 10:30:00	2018-12-18 15:15:00	1983-01-01 08:00:00	1995-03-23 09:00:00	1991-04-01 08:30:00	1900-09-27	wwwww	102	155.81	x		All winter						89003	0.378235		411.94
89004	2004-05-10 19:00:00	2003-04-01 01:30:00	2010-04-05 06:30:00	2013-10-03 01:30:00	2006-01-09 19:15:00	1900-07-22 12:00:00	swwww	93	1995-07-20 05:30:00	1997-04-23 15:45:00	1995-10-02 19:15:00	1999-06-19 14:30:00	1997-12-05 22:15:00	1900-08-30	swwsw	112	27.32	x		20/07/1995 and 20/6/99 not wow						89004	0.443975		61.535
89005	2000-09-06 04:45:00	2004-10-06 05:45:00	1995-03-23 09:00:00	2006-09-01 05:30:00	2011-02-03 18:00:00	1900-08-11 12:00:00	swwsw	101	2014-10-28 05:45:00	2004-10-06 05:45:00	2010-10-29 18:00:00	1983-12-27 12:45:00	2010-09-13 15:30:00	1900-10-09	wwwws	127	125.42	x		6/9/00 and 13/9/10 not wow						89005	0.56934		220.29
89006	1991-04-11 05:00:00	1992-05-05 22:00:00	1998-02-12 11:15:00	2012-11-19 05:15:00	1980-08-11 14:45:00	1900-08-10	wswws	87	1991-04-11 05:00:00	1998-02-12 11:15:00	2018-09-15 12:30:00	1992-05-05 22:00:00	2019-09-08 10:15:00	1900-09-18	wwsss	111	3.88	x		Too small						89006	0.418554		9.27
89007	2007-06-12 18:45:00	1991-10-16 01:45:00	2000-09-06 04:15:00	1994-02-01 09:00:00	1986-08-13 22:30:00	1900-08-17	swsws	76	1983-10-15 06:45:00	2007-06-12 18:45:00	2017-08-23 04:15:00	1988-09-06 18:45:00	1991-10-16 01:45:00	1900-09-07	wsssw	98	25.72	x	23.04	12/6/-7 is a wow; 1.2 - 24.4-36.0 - 40.2P						89007	0.734018		35.04
89008	2018-06-03 17:30:00	2003-07-19 13:00:00	2012-06-26 16:15:00	2014-08-03 15:00:00	2021-08-08 14:45:00	1900-08-27	sssss	76	2012-06-26 16:15:00	2002-08-15 02:00:00	2004-08-09 08:30:00	1985-10-04 03:45:00	2005-08-31 17:30:00	1900-08-20	sssws	98	5.24	x		Too small						89008	0.587444		8.92
90003	2021-08-11 16:45:00	2012-06-28 19:30:00	2013-04-14 01:45:00	2014-10-03 05:30:00	2007-07-14 02:30:00	1900-08-23 12:00:00	sswws	78	2008-07-31 04:30:00	2001-09-12 11:30:00	2001-10-01	1995-07-19 17:00:00	2020-01-02 13:15:00	1900-09-10	sswsw	87	33.29	ok		31/7/08 ok 3.8 - 5.6 - 38.8 - 47.0 P (12/9/01 similar)						90003	0.273688		121.635
91002	1998-12-15 05:45:00	1998-03-01 06:30:00	2006-10-06 02:45:00	1980-10-28 13:15:00	1992-01-01 04:45:00	1900-08-09	wwwww	87	2012-06-28 21:45:00	1998-12-15 06:00:00	1980-07-26 02:00:00	1998-03-01 06:30:00	2017-12-06 10:15:00	1900-09-27 12:00:00	swsww	115	128	ok		28/6/12 a wow; 12.4 - 94.3 - 222.3 - 248.6 p						91002	0.194083		659.51
92001	2015-01-09 01:30:00	2002-01-28 05:30:00	2016-01-29 07:15:00	2010-11-08 07:00:00	1999-11-30 03:00:00	1900-10-19 12:00:00	wwwww	124	2020-10-15 14:45:00	2002-01-28 05:30:00	2011-12-08 15:15:00	2013-12-05 06:30:00	2016-12-26 06:15:00	1900-02-16	wwwww	138	3.65	x		Too small						92001	0.0501787		72.74
92002	2003-07-18 13:45:00	2007-06-21 15:45:00	2009-07-17 18:45:00	2012-07-22 17:15:00	2004-08-26 18:30:00	1900-08-14	sssss	66	2007-06-21 15:45:00	2005-11-14 16:45:00	2003-07-18 13:45:00	2017-08-23 05:00:00	1987-08-20 13:45:00	1900-09-10	swsss	79	10.04	ok		21/6/07 a wow 0.16 - 10.2 - 10.9P						92002	0.706048		14.22
92003	2005-11-20 13:45:00	2003-05-07 18:30:00	2004-08-10 12:45:00	2002-02-21 15:00:00	2000-09-11 09:15:00	1900-07-29	wssws	78	2005-11-11 22:15:00	2001-12-03 16:30:00	2005-01-11 14:00:00	2004-09-12 21:15:00	2000-12-02 02:45:00	1900-08-28	wwwsw	99	272.57	x	59.09	10/8/04 1.9 - 3.76 - 62.85 73.44P also 7/5/03 and 12/9 04 with shoulders						92003	6.82278		39.95
92004	2021-10-26 22:00:00	2008-07-31 04:45:00	2009-07-26 09:45:00	2010-07-01 10:30:00	2011-05-07 20:30:00	1900-07-26	wssss	88	2014-02-06 15:45:00	2021-08-08 18:45:00	2010-12-27 15:30:00	2012-01-18 02:30:00	2019-08-31 09:15:00	1900-08-31	wswws	98	8.79	x		Too small						92004	0.133		66.09
93001	2013-09-15 07:30:00	2012-01-18 01:30:00	2011-09-06 08:15:00	2014-10-19 09:00:00	2019-07-24 07:45:00	1900-09-13	swsws	107	1983-12-31 09:30:00	2007-01-15 01:00:00	1990-09-18 19:15:00	1990-12-11 09:00:00	2008-10-20 02:00:00	1900-09-14 12:00:00	wwsww	127	27.03	x		No wow						93001	0.151001		179.005
93002	2007-06-21 18:00:00	2006-09-24 20:45:00	2004-08-18 16:45:00	2013-09-15 07:45:00	2016-06-24 19:45:00	1900-07-20	sssss	68	2005-09-13 10:45:00	2018-10-23 05:15:00	2016-02-01 02:45:00	2004-08-18 16:45:00	2013-09-15 07:45:00	1900-09-07	swwss	95	42.56	x	34.68	18/8/04 is wow 3.9 - 5.9 - 40.58 P in 1 hr (25/8/17 and 13/9/05 not wow)						93002	0.240357		177.07
94001	2009-10-03 10:45:00	2021-11-27 02:30:00	1986-11-05 06:15:00	1972-04-14 13:15:00	1972-12-11 19:15:00	1900-10-25	wwwww	107	2011-12-26 15:15:00	2015-01-12 10:30:00	2016-01-29 07:30:00	2006-12-04 05:00:00	2008-11-14 16:45:00	1900-04-15	wwwww	145	7.81	x		Too small and winter						94001	0.0678776		115.06
94003	2016-08-03 15:15:00	2011-12-19 15:15:00	2013-07-29 19:00:00	2021-11-04 15:15:00	2011-07-13 12:00:00	1900-08-26 12:00:00	swsws	101	2013-07-29 19:00:00	2016-08-03 15:15:00	2011-12-19 15:15:00	2014-08-11 12:45:00	2020-09-13 12:00:00	1900-08-28	sswss	99	4.52	x		Too small						94003	0.133471		33.865
95001	2008-10-29 12:30:00	1981-09-20 17:30:00	2011-10-18 13:30:00	1991-10-18 12:30:00	2015-12-09 14:15:00	1900-10-18	wswww	85	2008-10-29 12:30:00	2002-05-28 15:15:00	1981-09-20 17:45:00	2011-10-18 13:15:00	2004-01-19 12:30:00	1900-10-04	wssww	106	7.86	x		Too small						95001	0.202291		38.855
95002	2011-07-10 15:15:00	2003-04-01 01:00:00	2012-02-04 15:15:00	2014-08-03 19:00:00	2007-07-05 20:00:00	1900-08-25	swwss	110	2015-08-10 16:30:00	2015-12-30 04:45:00	2003-04-01 01:00:00	1990-01-14 21:15:00	1992-01-06 09:00:00	1900-09-14	swwww	121	50.8	x	18.17	10/8/15 rapid rise but not wow; 10/7/11 a wow 0.84 -19.01 - 21.02P						95002	0.343917		147.71
95003	2015-08-10 16:30:00	2014-08-06 14:30:00	2011-07-10 06:30:00	2019-09-27 14:00:00	2021-07-10 17:15:00	1900-08-08 12:00:00	sssss	50	2014-08-06 14:30:00	2018-10-23 02:15:00	2015-08-10 16:30:00	2017-10-07 07:30:00	2011-07-10 06:30:00	1900-08-08	swsws	84	14.06	ok		6/8/14 0.92 -14.98 - 19.38 - 19.49 P (also 10/8/15)						95003	0.416654		33.745
95004	2017-08-25 14:30:00	2015-08-10 17:15:00	2014-08-06 14:30:00	2019-07-24 09:15:00	2010-08-23 21:15:00	1900-08-10	sssss	68	2017-08-25 14:30:00	2015-08-10 17:30:00	2019-07-24 09:15:00	2016-02-01 04:15:00	2021-10-26 11:45:00	1900-08-23	ssssw	96	5.04	x		Too small						95004	0.461538		10.92
95005	2006-10-26 23:15:00	2009-02-16 18:00:00	2013-12-05 02:15:00	2005-11-14 18:15:00	2019-05-26 17:00:00	1900-10-09	wwwws	129	2006-10-26 23:15:00	2009-02-16 18:00:00	2005-11-14 18:15:00	2021-11-20 09:45:00	2014-08-11 09:00:00	1900-09-15	wwwws	130	20.14	?		Q missing						95005	0.456482		44.12
95006	2014-08-11 10:30:00	2014-10-08 01:45:00	2013-09-16 21:30:00	2019-01-13 01:45:00	2016-01-29 04:45:00	1900-08-11	swsww	129	2019-01-13 03:45:00	2010-12-10 20:00:00	2014-10-08 01:45:00	2008-01-27 03:15:00	2014-08-11 10:45:00	1900-03-15	wwwws	133	15.59	?		Q missing						95006	0.236212		66
96001	1980-08-01 18:45:00	1988-07-07 13:00:00	1982-05-22 19:15:00	1985-12-31 13:30:00	1987-01-19 10:00:00	1900-08-01	sssww	86	1987-01-19 10:00:00	2010-01-13 14:45:00	1988-07-07 13:15:00	1980-07-26 04:00:00	1985-12-31 13:30:00	1900-08-24	wwssw	100	41.68	?		Q missing						96001	0.4194		99.38
96002	2010-01-14 11:15:00	1998-06-27 16:30:00	1996-01-02 11:00:00	1985-12-01 06:30:00	2013-05-13 23:00:00	1900-07-30	wswws	100	2010-01-14 11:15:00	1998-06-27 16:30:00	1983-10-04 18:30:00	2006-10-26 18:00:00	1985-12-01 06:30:00	1900-09-07 12:00:00	wswww	121	31.27	?		Q missing						96002	0.226775		137.89
96003	1998-06-27 18:15:00	2010-12-28 13:30:00	1996-01-02 06:45:00	1985-12-31 15:00:00	2005-06-13 04:15:00	1900-07-01	swwws	100	1998-06-27 18:30:00	2010-12-28 13:30:00	1996-01-02 06:45:00	1985-12-31 15:00:00	1989-04-12 04:30:00	1900-08-01	swwww	108	15.67	?		Q missing						96003	0.339031		46.22
96004	2002-09-25 14:15:00	2013-06-22 18:00:00	2006-07-11 07:15:00	2011-07-16 13:30:00	2007-07-03 14:45:00	1900-08-25	sssss	78	2016-07-20 04:45:00	2017-08-25 16:00:00	1995-09-08	2015-08-10 18:15:00	2014-08-11 04:45:00	1900-08-25	sssss	95	73.06	73.06		Q missing						96004	0.335415		217.82
96005	2015-08-10 19:00:00	2010-12-10 15:00:00	2016-11-16 03:45:00	2010-09-20 03:00:00	2011-11-23 05:15:00	1900-08-17	swwsw	77	2010-12-10 15:00:00	2016-11-16 03:45:00	2015-08-10 19:15:00	2011-11-23 05:15:00	2007-12-07 04:30:00	1900-09-15 12:00:00	wwsww	78	39.61	?		Q missing						96005	0.585514		67.65
96006	2019-07-11 16:00:00	2012-01-21 05:30:00	2014-10-28 05:30:00	2017-06-06 21:30:00	2016-01-08 03:00:00	1900-08-28	swwsw	109	2014-08-11 06:00:00	2019-07-11 16:00:00	2012-01-21 05:30:00	2021-08-04 23:15:00	2008-09-01 15:30:00	1900-08-11	sswss	117	4.84	?		Q missing						96006	0.332418		14.56
97002	2010-12-28 10:15:00	1978-02-23 05:00:00	1985-12-31 15:15:00	2010-01-14 12:30:00	2014-08-11 04:45:00	1900-09-24	wwwws	125	2006-10-26 14:00:00	1978-02-23 05:00:00	2010-01-14 12:30:00	2010-12-28 10:15:00	1985-12-31 15:15:00	1900-08-14 12:00:00	wwwww	137	17.02	?		Q missing						97002	0.164341		103.565
105001	2010-01-15 08:30:00	2008-04-25 23:30:00	2016-02-16 11:15:00	2019-02-15 22:15:00	2012-02-04 13:30:00	1900-05-27	wwwww	115	2010-01-15 08:30:00	2016-09-24 09:00:00	2001-06-19 12:30:00	2010-12-04 21:00:00	2001-10-29 03:30:00	1900-09-14	wssww	123	12.21	x		winter						105001	0.199331		61.255
106001	1998-07-21 20:15:00	2011-10-24 01:15:00	2000-10-03 20:45:00	1998-11-06 18:30:00	2013-12-05 05:00:00	1900-10-04	swwww	118	1998-07-21 21:00:00	2010-01-16 07:45:00	2007-08-06 22:00:00	2011-10-24 01:15:00	2000-02-10 03:45:00	1900-10-15	swsww	126	5.7	x		Too small						106001	0.458937		12.42
106002	2021-09-09 12:45:00	2014-10-03 01:30:00	2013-08-02	2016-09-23 16:45:00	2007-10-26 07:15:00	1900-09-26	swssw	67	2013-10-22 19:45:00	2011-11-22 23:45:00	2015-03-28 07:00:00	2019-08-28 02:45:00	2013-08-02	1900-09-17	wwwss	59	3.69	x		Too small						106002	0.21491		17.17
106003	2011-08-04 08:30:00	2013-07-26 14:15:00	2012-08-07 12:15:00	2014-07-31 07:30:00	2010-07-01 09:00:00	1900-08-08	sssss	37	2017-08-23 00:30:00	2021-11-12 10:30:00	2019-08-28 01:00:00	2014-10-19 04:00:00	2020-10-31 08:15:00	1900-08-23	swsww	51	16.81	x		No wow						106003	1.04931		16.02
107001	2007-12-03 12:00:00	2017-06-07 12:30:00	2015-01-13 00:15:00	2012-10-20 05:15:00	2006-10-26 15:15:00	1900-09-01 12:00:00	wswww	112	2005-03-16 09:00:00	2017-06-07 12:30:00	2006-10-26 15:15:00	2013-11-03 06:45:00	2011-08-28 13:00:00	1900-09-15	wswws	115	0.9	x		Too small						107001	0.192926		4.665
108001	2002-06-26 06:15:00	2006-05-24 19:15:00	2009-10-27 11:30:00	2008-11-04 15:30:00	2003-10-22 10:30:00	1900-09-07	sswww	94	2007-08-20 10:45:00	2005-08-31 23:45:00	2008-10-04 10:45:00	2010-07-11 06:15:00	2011-12-08 14:00:00	1900-09-25	sswsw	101	40.59	x		no wow						108001	1.77715		22.84

## Sheet: prop rise
	Level	Dates							Discharge	Dates						RoR t/RORt-1		Old Hmax Date		New Hmax date
1001	2010-12-28 06:45:00	2012-10-20 04:30:00	1999-04-21 04:00:00	2020-02-29 08:00:00	1996-01-01 18:15:00	1900-07-09	wwwws	95	2006-10-12 01:45:00	1997-07-01 09:30:00	2010-08-05 23:30:00	2012-10-20 04:30:00	2016-06-24 15:45:00	1900-10-07	wssws	0.746939
2001	1980-07-26 04:45:00	1978-02-23 02:45:00	1981-12-13 16:30:00	2001-02-11 14:30:00	1988-10-26 04:15:00	1900-08-31	swwww	118	1980-07-26 05:00:00	1978-02-23 02:45:00	2001-02-11 14:30:00	1988-01-20 11:45:00	1980-11-24 17:15:00	1900-10-04	swwww	0.8405
2002	2013-02-05 15:15:00	2014-08-11 08:30:00	2006-10-02 05:30:00	2014-10-07 18:00:00	2002-02-22 00:45:00	1900-09-24 12:00:00	wswww	105	2013-02-05 15:15:00	2014-08-11 10:00:00	2005-11-26 02:15:00	2006-10-26 07:15:00	2002-01-28 14:15:00	1900-08-31 12:00:00	wswww	1.21386
3002	2004-09-12 06:15:00	2017-11-07 00:30:00	2016-08-08 02:45:00	2011-09-06 12:00:00	1975-07-15 01:00:00	1900-09-06	swsss	86	2018-10-23 04:45:00	2017-11-07 00:30:00	2014-10-07 14:00:00	2016-08-08 02:45:00	2005-12-15 19:45:00	1900-09-26	wwwsw	13.8795
3003	2014-08-29 15:30:00	2015-08-10 17:30:00	2012-08-21 20:30:00	2013-07-29 19:30:00	2001-01-24 14:15:00	1900-08-10	ssssw	92	2015-08-10 17:45:00	1978-10-05 11:30:00	1990-03-10 13:15:00	2013-07-29 19:30:00	2014-08-29 15:30:00	1900-09-11	swwss	23.184	ok			23.2
3004	2006-07-11 09:15:00	2013-04-16 20:45:00	2011-07-16 15:15:00	2019-07-31 10:45:00	2001-05-29 03:00:00	1900-08-02	swsss	90	2014-08-06 18:00:00	2019-07-31 10:45:00	2006-07-11 09:15:00	2001-05-29 03:00:00	2010-12-30 11:45:00	1900-08-02	ssssw	63.3768	ok			63.4
3006	2014-08-11 06:15:00	2013-09-03 10:00:00	2008-03-21 14:30:00	2021-11-18 04:45:00	2016-12-23 20:15:00	1900-08-22 12:00:00	sswww	122	2014-08-11 06:15:00	2013-09-03 10:00:00	2018-10-23 03:00:00	2012-01-12 01:00:00	2021-11-18 04:45:00	1900-09-15	sswww	0.810474
4001	1979-02-26 15:30:00	2010-11-03 12:45:00	1982-10-01 09:00:00	1987-01-13 17:00:00	2016-01-29 09:30:00	1900-06-18	wwwww	130	1979-02-26 15:30:00	1980-12-14 18:30:00	1981-10-28 17:30:00	1979-10-22 07:45:00	1982-10-01 09:00:00	1900-05-04	wwwww	2.90533
4003	1975-07-15	1977-08-25 08:15:00	1974-07-12 21:30:00	2019-07-10 14:30:00	1980-06-06 19:45:00	1900-08-06	sssss	64	1975-07-15	2019-07-10 14:30:00	1977-08-25 08:15:00	2012-08-06 23:15:00	2006-10-26 08:15:00	1900-08-17 12:00:00	ssssw	20.5385	OK	20.5		20.5
4005	2007-07-03 14:15:00	2019-07-30 21:30:00	2004-08-16 18:15:00	1988-07-07 15:45:00	1992-01-06 08:15:00	1900-07-30	ssssw	87	2004-12-21 21:15:00	2004-02-02 17:15:00	2003-03-09 11:00:00	2019-07-30 21:30:00	2007-07-03 14:15:00	1900-07-30	wwwss	inf
4006	2010-01-16 06:30:00	1990-12-11 06:00:00	2010-12-29 22:45:00	2001-01-24 14:15:00	1996-01-04 08:30:00	1900-09-11	wwwww	120	2010-01-16 06:30:00	2013-12-14 15:45:00	2013-01-02 19:00:00	2014-10-21 06:00:00	2010-12-29 22:45:00	1900-05-05	wwwww	inf
4007	2002-08-06 22:00:00	2020-01-11 03:30:00	2018-10-23 07:00:00	2005-12-15 21:00:00	2017-08-25 18:15:00	1900-09-15	swwws	111	2020-01-11 03:45:00	2010-12-10 12:30:00	2018-01-28 22:45:00	2005-12-15 21:00:00	2017-08-25 18:30:00	1900-07-28	wwwws	5.82932
4008	2015-08-10 19:30:00	2011-06-13 11:00:00	2006-10-24 05:15:00	1998-05-14 18:30:00	2000-08-27 23:45:00	1900-08-10	sswss	90	2006-10-24 05:15:00	2011-12-08 15:00:00	2015-01-15 13:00:00	1997-05-19 04:00:00	2017-11-21 21:15:00	1900-08-20	wwwsw	1.5
4009	1997-07-01 08:00:00	2000-08-18 21:30:00	1995-11-26 23:30:00	2010-12-10 13:45:00	1998-06-25 13:30:00	1900-07-11	sswws	56	2013-12-28 09:00:00	2014-10-28 05:15:00	2000-08-18 21:30:00	2004-08-18 17:45:00	2002-02-21 20:00:00	1900-08-19	wwssw	3.3
4010	2016-02-01 05:00:00	2019-07-30 20:30:00	2020-01-07 14:30:00	2016-12-23 12:15:00	2014-12-09 12:45:00	1900-10-24 12:00:00	wswww	134	2020-01-07 14:30:00	2016-01-29 05:45:00	2013-12-05 05:30:00	2019-07-30 20:45:00	2015-01-09 23:45:00	1900-08-06 12:00:00	wwwsw	0.304447
4011	2016-06-07 14:30:00	2012-07-22 16:30:00	2019-07-30 19:30:00	2015-06-25 17:15:00	2013-09-15 07:30:00	1900-08-12 12:00:00	sssss	83	2016-06-07 14:30:00	2019-07-30 19:30:00	2012-07-22 16:30:00	2016-10-18 00:45:00	2011-09-25 17:45:00	1900-07-26 12:00:00	sssws	19.1678		19.2		19.2
5003	1989-04-13 01:45:00	1990-02-14 13:45:00	1990-11-12 17:30:00	1991-10-28 17:30:00	1993-04-23 04:45:00	1900-06-18	wwwww	103	1990-02-14 13:45:00	1993-04-23 04:45:00	2009-02-13 09:45:00	2009-12-06 17:00:00	2018-08-27 17:15:00	1900-04-27 12:00:00	wwwws	0.793803
5004	2021-07-05 20:00:00	2008-12-03 22:00:00	2017-08-26 01:45:00	2013-04-14 04:15:00	2005-09-26 14:45:00	1900-08-19 12:00:00	swsws	82	2008-10-25 10:15:00	1997-03-01 09:00:00	2015-11-08 16:00:00	1995-09-23 19:30:00	2021-07-05 20:00:00	1900-09-03	wwwss	8.10983
6007	2013-02-04 13:45:00	1977-11-08 19:45:00	2020-10-24 07:30:00	2002-03-10 22:00:00	2020-02-09 15:15:00	1900-10-06	wwwww	130	2016-05-05 12:30:00	1976-01-27 07:00:00	1995-10-25 01:30:00	1977-11-08 19:45:00	1972-12-04 21:45:00	1900-08-31	swwww	0.113576
6008	1981-11-20 06:45:00	1992-01-06 11:15:00	2015-12-04 19:15:00	1990-12-28 12:00:00	1999-01-15 11:45:00	1900-08-19	wwwww	126	1980-07-27 09:00:00	2015-03-07 05:30:00	2006-12-01 01:15:00	1990-02-05 02:15:00	1994-03-05 01:00:00	1900-10-01	swwww	0.112576
6011	2018-06-02 18:30:00	2012-06-28 18:30:00	2004-05-09 19:30:00	2006-09-01 08:00:00	2016-08-07 17:30:00	1900-08-10 12:00:00	sssss	84	2012-06-28 18:45:00	2016-08-07 17:30:00	2000-08-02 18:30:00	2018-06-02 18:30:00	2004-08-17 20:00:00	1900-08-05 12:00:00	sssss	130.72				130.7
6012	2009-07-06 18:45:00	2016-07-20 05:00:00	2011-06-07 20:45:00	2012-02-04 15:30:00	2021-02-15 04:30:00	1900-07-08 12:00:00	sssww	90	2016-07-20 05:00:00	2009-02-15 03:45:00	2011-01-13 09:15:00	2010-01-16 12:00:00	2014-02-26 14:45:00	1900-05-09 12:00:00	swwww	4.49462
6013	2013-06-22 13:45:00	2020-06-26 15:30:00	2019-08-07 01:15:00	2021-07-04 15:30:00	2004-06-20 14:00:00	1900-07-21	sssss	64	2002-09-08 03:00:00	2019-08-07 01:15:00	1998-11-14 15:30:00	2009-07-02 15:30:00	2016-05-21 12:00:00	1900-07-13	sswss	4.66667
7001	1994-08-04 02:15:00	2019-08-01 02:15:00	1986-08-14 07:15:00	2016-07-20 07:45:00	2005-08-31 22:30:00	1900-09-17	sssss	86	2014-08-11 07:45:00	2014-11-14 18:15:00	2005-08-31 22:30:00	1980-07-26 04:30:00	2019-08-01 02:15:00	1900-09-09 12:00:00	swsss	52.8579
7002	1990-06-07 03:30:00	1980-07-26 09:00:00	2011-07-07 03:15:00	2005-09-01 03:15:00	2006-07-03 10:00:00	1900-09-21	sssss	89	1990-06-07 03:30:00	2014-08-17 21:30:00	1980-07-26 09:00:00	2016-01-26 16:30:00	1958-09-07 02:00:00	1900-09-18	sssws	28.0564		28.0564		28.0564
7003	2004-08-19 11:30:00	2009-07-24 14:45:00	2015-09-02 01:15:00	2002-07-30 18:45:00	2014-08-11 03:30:00	1900-08-26	sssss	68	2004-08-19 11:30:00	2014-08-11 07:00:00	2004-10-17 16:45:00	2009-11-01 23:15:00	1997-07-01 10:30:00	1900-09-02	sswws	0.660827
7004	2006-08-01 21:45:00	2000-08-28 03:45:00	2011-07-16 16:45:00	1990-06-07 01:30:00	1981-09-20 08:15:00	1900-08-12	sssss	78	2006-08-01 21:45:00	1981-09-20 13:15:00	1981-10-03 03:30:00	1990-06-07 01:30:00	1990-10-28 19:30:00	1900-08-12 12:00:00	sswsw	15.7632		15.76		15.76
7005	1985-07-27 17:15:00	1999-06-28 16:45:00	1986-03-04 15:15:00	1983-05-07 19:00:00	1989-09-23 06:15:00	1900-08-11 12:00:00	sswss	84	2004-08-19 03:00:00	1985-12-01 08:00:00	2014-08-11 04:45:00	1984-09-23 18:30:00	1985-07-27 17:15:00	1900-09-03	swsss	1.78571
7008	2008-08-03 21:45:00	2006-08-01 16:30:00	2009-07-06 23:15:00	2007-08-18 18:30:00	2004-12-14 20:15:00	1900-08-07	ssssw	76	2006-08-01 16:30:00	2008-08-03 21:45:00	2009-07-06 23:15:00	2007-08-18 18:30:00	1997-08-13 20:00:00	1900-08-10	sssss	15.8298
7009	2019-08-07 02:15:00	2004-10-17 13:30:00	1999-06-28 18:30:00	2008-08-21 14:15:00	1999-11-28 19:45:00	1900-08-20 12:00:00	swssw	73	2004-10-17 13:30:00	2014-08-11 05:30:00	2002-11-16 13:00:00	2009-09-04 06:00:00	2020-12-08 04:15:00	1900-08-10 12:00:00	wswsw	0.59589
7010	2011-07-16 20:45:00	2021-07-27 19:15:00	2009-07-14 22:45:00	2020-06-06 04:30:00	2014-08-17 20:15:00	1900-07-21 12:00:00	sssss	72	2011-07-16 20:45:00	2005-06-13 07:00:00	2021-07-27 19:15:00	2014-08-11 05:45:00	2014-10-08 04:15:00	1900-07-15	ssssw	5.67213
7011	2020-12-31 08:15:00	2016-01-10 05:15:00	2013-06-23 19:30:00	2012-08-25 06:30:00	2014-08-11 02:15:00	1900-08-11	wwsss	109	2014-08-11 08:15:00	2017-06-07 01:30:00	2020-12-08 02:30:00	2016-01-10 05:15:00	2014-10-07 20:00:00	1900-08-26	sswww	0.30303
7012	2015-09-01 21:15:00	2019-04-03 11:00:00	2017-06-07 00:15:00	2020-12-08 02:15:00	2021-11-01 06:30:00	1900-08-18	swsww	99	2017-06-07 03:00:00	2020-12-08 03:45:00	2019-04-03 11:00:00	2015-09-01 22:45:00	2016-08-03 15:45:00	1900-10-11 12:00:00	swwss	0.538462
8002	2021-10-31 17:15:00	1987-09-24 21:45:00	1988-08-12 20:45:00	1989-09-20 08:00:00	1989-12-24 15:45:00	1900-09-27 12:00:00	wsssw	56	2019-12-23 03:45:00	2012-08-05 23:45:00	2019-07-24 10:00:00	1999-09-08 21:15:00	2015-07-17 09:45:00	1900-10-03	wssss	0.402299
8004	2011-07-09 19:15:00	2004-08-04 08:00:00	1980-06-06 19:15:00	1989-01-13 21:30:00	1993-10-01 10:30:00	1900-09-12 12:00:00	sssww	91	1980-06-06 19:15:00	1990-10-28 19:45:00	2015-07-17 10:30:00	2000-10-28 22:45:00	1989-01-13 21:30:00	1900-09-19 12:00:00	swsww	12.8589		12.86
8005	2019-12-10 16:45:00	2011-08-10 16:30:00	2004-10-21 13:45:00	2005-10-30 20:45:00	2016-12-23 19:30:00	1900-10-22	wswww	102	2003-11-29 17:45:00	2019-12-10 16:45:00	2019-07-24 14:15:00	1990-02-05 10:15:00	2001-10-31 04:15:00	1900-09-18	wwsww	0.259338
8006	2006-09-15 03:15:00	1982-08-07 03:15:00	1978-08-05 00:45:00	1980-06-06 22:15:00	1992-08-30 18:00:00	1900-08-31 12:00:00	sssss	83	1982-08-07 03:15:00	1980-06-06 22:15:00	1982-10-04 23:30:00	1975-11-16 09:45:00	1958-07-28 23:15:00	1900-09-07	sswws	2.19719				2.2
8007	2000-08-02 20:00:00	2001-01-22 20:30:00	2004-10-19 16:30:00	1991-09-21 17:00:00	2001-10-01 01:45:00	1900-09-21	swwsw	106	2021-11-09 13:15:00	1998-10-16 15:45:00	2009-07-02 19:30:00	2001-10-01 01:45:00	2011-10-29 18:15:00	1900-08-21 12:00:00	wwsww	3.0317
8008	2005-01-01 14:15:00	2009-08-20 10:00:00	2018-09-18 00:30:00	2007-06-22 17:15:00	2015-06-01 21:15:00	1900-09-07 12:00:00	wssss	97	1993-01-17 09:00:00	2002-07-30 18:45:00	2009-08-20 10:00:00	2005-11-07 23:00:00	2005-01-01 14:15:00	1900-08-24	wssww	9.72137				9.72
8009	1981-09-18 10:15:00	2016-06-07 19:00:00	1990-06-07 01:30:00	2005-09-01 00:15:00	1998-08-10 22:00:00	1900-08-30	sssss	103	1981-09-20 10:30:00	1958-08-11 02:45:00	1985-12-01 07:15:00	1990-06-07 01:30:00	1963-03-05 22:15:00	1900-08-10 12:00:00	sswsw	11.6
8010	1989-01-13 22:00:00	1992-10-01 08:00:00	2012-10-12 16:15:00	2002-11-15 12:30:00	1988-08-13 01:00:00	1900-09-03	wwwws	76	1990-06-07 03:30:00	1989-01-13 22:00:00	1993-01-16 21:15:00	2015-12-05 05:45:00	2007-06-21 18:45:00	1900-09-01	swwws	0.146952
8011	2016-06-24 16:45:00	2001-06-27 19:30:00	2002-08-06 13:45:00	2005-06-03 20:45:00	1999-07-10 15:45:00	1900-08-08	sssss	46	2002-08-06 13:45:00	2004-08-19 02:00:00	2014-08-11 06:00:00	2001-06-27 19:30:00	1999-07-10 15:45:00	1900-08-11 12:00:00	sssss	5.66957				5.66
8013	2015-07-17 08:30:00	2005-08-24 07:15:00	2015-10-24 09:00:00	2020-07-27 17:45:00	2012-08-05 22:30:00	1900-08-26	sswss	51	2015-12-30 12:15:00	2016-12-23 19:30:00	2019-07-24 08:45:00	2015-07-17 08:30:00	2002-07-30 20:30:00	1900-08-29 12:00:00	wwsss	30.5149
9001	2009-07-06 23:00:00	1977-08-26 14:30:00	2013-10-10 01:30:00	1992-08-30 17:00:00	2007-06-24 00:30:00	1900-08-26	sswss	78	1962-01-05 20:15:00	1970-08-16 14:00:00	2009-07-06 23:00:00	1972-05-27 16:15:00	1977-08-26 14:30:00	1900-08-26	wssss	10.1121
9002	2009-07-07 04:00:00	1984-09-24 00:30:00	1977-08-26 19:15:00	1967-10-04 13:45:00	1972-05-27 23:30:00	1900-08-21	sssws	72	2009-11-01 21:45:00	1960-08-25 21:45:00	1972-05-27 23:30:00	1970-08-16 18:30:00	1960-11-04 07:30:00	1900-08-26	wsssw	5.2381
9003	1996-01-01 09:00:00	2021-07-11 18:45:00	1991-11-04 04:45:00	2002-07-30 23:30:00	2004-08-18 16:15:00	1900-08-15	wswss	96	2009-11-01 22:30:00	2021-07-11 19:00:00	2017-10-22 08:30:00	2014-08-11 00:45:00	2005-11-25 11:15:00	1900-08-26 12:00:00	wswsw	2.59748
9004	2002-07-30 22:15:00	2010-09-23 04:30:00	2016-07-20 20:00:00	2000-04-23 15:15:00	1993-09-11 14:30:00	1900-08-14	sssws	81	2002-07-30 22:15:00	2016-07-20 20:00:00	1998-04-04 09:00:00	2002-11-15 12:45:00	2007-11-22 12:00:00	1900-09-07	sswww	0.688017
9005	2009-07-06 19:00:00	2010-04-01 09:15:00	2015-07-17 10:00:00	2013-11-02 19:30:00	2004-08-18 13:15:00	1900-08-07	swsws	89	2009-07-06 19:00:00	2004-08-18 13:15:00	2021-08-10 19:45:00	1995-09-07 23:00:00	2001-08-19 22:45:00	1900-09-07	sssss	1.30124
9006	2021-05-10 17:45:00	2010-09-23 05:00:00	2002-07-19 10:15:00	2020-07-27 20:00:00	2014-08-10 23:15:00	1900-08-19 12:00:00	sssss	87	2010-09-23 09:00:00	1995-09-12 09:00:00	2014-08-10 23:45:00	2009-09-04 00:30:00	2014-10-08 03:30:00	1900-09-08	ssssw	5.32727
9010	2009-07-06 21:30:00	2012-10-12 15:30:00	2015-07-17 14:15:00	2021-05-19 00:45:00	2013-10-09 23:30:00	1900-07-19	swssw	71	2009-07-06 21:45:00	2012-10-12 15:30:00	2015-12-30 12:15:00	2009-11-02 00:45:00	2021-08-07 07:30:00	1900-08-07	swwws	4.85856		4.86		4.86
10002	2014-01-19 18:00:00	1998-11-26 15:15:00	1995-09-12 05:30:00	2016-01-08 07:00:00	2009-11-02 05:15:00	1900-08-11	wwsww	118	2016-01-08 07:00:00	1991-10-20 09:00:00	2010-12-11 06:15:00	1996-09-26 09:00:00	2009-11-02 05:15:00	1900-09-19 12:00:00	wwwsw	8.31892
10003	2020-10-22 02:45:00	2017-08-18 18:00:00	1999-12-25 00:30:00	1985-08-30 09:45:00	1987-10-21 08:15:00	1900-10-21	wswsw	96	2016-01-08 00:30:00	1996-02-10 09:00:00	2020-10-22 06:15:00	2009-11-01 20:15:00	2008-04-08 15:45:00	1900-10-07 12:00:00	wwwww	0.259638
11001	2003-12-24 20:00:00	2007-06-24 07:15:00	2001-10-21 02:15:00	2012-10-12 19:15:00	2016-01-08 00:30:00	1900-08-09	wswww	75	2016-01-08 04:00:00	2012-09-25 19:45:00	2009-10-22 18:15:00	2003-12-24 20:00:00	2002-10-23 07:00:00	1900-08-12	wswww	0.24896
11002	1973-12-03 09:45:00	1982-08-07 10:45:00	1999-07-11 00:30:00	1986-03-04 22:00:00	1979-01-15 00:15:00	1900-08-06 12:00:00	wssww	97	1973-12-03 09:45:00	1981-12-31 01:30:00	1979-01-15 00:15:00	1999-07-11 00:30:00	1984-09-24 01:30:00	1900-08-19 12:00:00	wwwwss	3.9615
11003	1982-08-07 06:15:00	1999-07-10 19:15:00	1995-12-30 19:15:00	1985-01-27 18:15:00	1984-09-23 21:45:00	1900-08-06 12:00:00	sswws	80	1995-12-30 19:15:00	1982-08-07 06:15:00	1999-07-10 19:15:00	2004-08-19 03:30:00	1985-01-27 18:15:00	1900-09-04	wsssw	5.28719
11004	1990-11-18 03:00:00	2002-09-07 17:30:00	2013-11-03 06:45:00	2020-10-22 06:30:00	2010-11-19 06:15:00	1900-09-09	wswww	90	1995-09-08 09:00:00	2009-11-02 00:15:00	2016-01-08 00:30:00	1990-11-18 03:00:00	2015-07-07 16:45:00	1900-09-04	swwws	0.645
11006	2007-06-21 19:00:00	2011-06-21 04:45:00	2004-01-01 09:00:00	1999-07-10 14:45:00	2019-07-10 19:45:00	1900-07-22 12:00:00	sswss	84	2009-11-02 01:15:00	2021-02-21 00:30:00	1999-07-10 14:45:00	2007-06-22 19:00:00	2001-08-19 21:30:00	1900-08-04	wwsss	0.912575
12001	2007-10-28 12:30:00	1989-09-20 17:45:00	2019-07-24 20:00:00	1993-10-01 13:00:00	1990-01-10 18:45:00	1900-09-18	wssww	88	2015-12-30 14:30:00	1981-10-03 01:30:00	1989-09-20 17:45:00	2002-07-31 03:45:00	1990-01-10 18:45:00	1900-09-24	swwssw	7.80596
12002	1982-08-07 04:00:00	1993-10-01 15:30:00	1990-01-10 20:15:00	1989-09-20 19:30:00	2000-01-31 04:00:00	1900-09-10 12:00:00	swwsw	99	1982-09-25 02:30:00	1993-10-01 15:30:00	2002-07-31 05:30:00	2014-10-06 17:45:00	1992-02-27 20:45:00	1900-09-22 12:00:00	swsww	2.43779
12003	1991-09-21 23:00:00	1990-09-07 00:15:00	1999-09-09 01:00:00	2020-07-27 21:15:00	2019-07-24 13:45:00	1900-08-25 12:00:00	sssss	90	1982-08-06 20:15:00	2021-02-20 20:00:00	2018-12-18 12:45:00	1990-09-07 00:15:00	2014-10-06 12:15:00	1900-09-08	swwsw	9.08
12004	2000-07-29 16:00:00	2020-08-12 06:00:00	2004-08-04 04:30:00	1996-07-23 16:30:00	1999-05-12 14:00:00	1900-08-04	sssss	101	1995-09-09 22:15:00	1993-01-15 05:15:00	1998-06-07 14:00:00	1996-01-08 23:15:00	2002-07-31 00:30:00	1900-07-17	swsws	53.1
12005	2001-07-03 21:15:00	2018-06-02 16:15:00	2007-06-08 00:30:00	2020-08-12 06:45:00	2021-08-06 10:30:00	1900-08-08	sssss	66	1999-09-20 23:15:00	2004-08-18 09:00:00	2007-06-08 00:30:00	2018-06-02 16:15:00	2001-07-03 21:15:00	1900-08-06	sssss	14.2348
12006	2006-02-03 13:15:00	2001-10-14 21:00:00	2000-08-08 16:15:00	1991-06-30 18:15:00	1993-01-01 12:15:00	1900-07-24	wwssw	120	2001-10-14 21:00:00	2021-02-24 15:15:00	1993-01-15 09:00:00	1990-10-28 21:30:00	2015-07-17 09:00:00	1900-07-11	wwwws	5.22487
12007	2019-07-24 09:00:00	1999-09-08 19:30:00	1984-09-23 14:30:00	1991-09-21 17:00:00	1990-09-06 19:00:00	1900-09-01	sssss	99	2019-07-24 09:00:00	2015-07-17 07:30:00	1999-09-08 19:30:00	1988-10-07 13:45:00	2020-06-17 02:30:00	1900-09-10	sssws	8.04811		8		8
12008	2000-07-30 16:45:00	2015-07-17 08:15:00	2003-04-22 05:00:00	1988-10-19 08:30:00	2011-10-25 12:15:00	1900-08-25 12:00:00	sswww	66	1987-07-11 17:30:00	2015-12-30 11:45:00	2015-07-07 18:15:00	1988-10-19 08:30:00	2012-08-16	1900-10-02 12:00:00	swsws	9.53472
12009	1991-06-23 16:15:00	2004-08-18 07:15:00	2015-07-07 16:00:00	2012-08-27 15:15:00	2011-07-10 11:30:00	1900-09-11	sssss	58	2000-07-30 15:00:00	2015-07-07 16:45:00	2006-10-19 15:30:00	1991-06-23 16:15:00	1995-09-07 20:15:00	1900-10-04	sswss	9.90385
13001	1987-07-11 17:00:00	1991-06-23 20:00:00	2005-05-03 16:00:00	2019-08-09 16:45:00	2021-05-12 09:15:00	1900-09-15 12:00:00	sssss	106	2012-12-23 04:00:00	2010-11-19 10:15:00	1979-10-04 15:30:00	2009-11-01 23:30:00	2020-10-04 03:30:00	1900-09-05 12:00:00	wwwww	5.95946
13002	2019-07-10 18:15:00	1993-07-17 14:30:00	1987-10-18 13:00:00	1987-07-11 19:00:00	2017-07-26 17:15:00	1900-08-28	sswss	94	1985-12-01 05:15:00	2019-07-10 18:15:00	1988-04-18 23:30:00	1984-11-10 03:30:00	1988-10-26 04:30:00	1900-08-04 12:00:00	wswww	7.50526
13004	2021-09-10 18:00:00	1998-06-26 20:15:00	2000-06-22 18:30:00	2010-09-07 16:00:00	2007-10-28 05:45:00	1900-08-23	ssssw	57	2015-07-17 06:30:00	2021-09-10 18:00:00	2005-06-04 14:00:00	2005-10-30 15:00:00	2004-08-19 12:15:00	1900-09-09	sssws	18.8926
13005	2002-10-22 08:45:00	1998-10-16 14:15:00	2019-08-09 16:30:00	1994-01-03 20:45:00	2012-11-22 14:15:00	1900-09-18 12:00:00	wwsww	110	2002-10-22 08:45:00	2020-10-22 04:30:00	2001-02-28 16:00:00	2004-10-21 11:00:00	2019-08-09 17:00:00	1900-06-13	wwwws	1.12195
13007	1992-08-22 23:45:00	1997-11-18 08:45:00	2021-08-06 12:00:00	2010-09-07 18:30:00	2012-08-27 16:15:00	1900-09-07	swsss	95	2015-07-17 09:15:00	1997-11-18 08:45:00	2018-11-10 04:45:00	2010-10-01 17:00:00	2000-09-20 03:30:00	1900-09-20	swwws	4.10465
13008	2020-08-12 10:30:00	2015-07-17 10:00:00	2017-09-28 07:30:00	2011-10-25 13:45:00	2009-04-08 09:15:00	1900-09-16	sssww	68	2015-07-17 10:00:00	2020-08-12 10:30:00	2012-08-27 16:45:00	1988-10-19 10:00:00	2017-09-28 07:30:00	1900-09-21	sssws	2.04447
13009	1992-08-22 21:45:00	2009-07-06 14:00:00	1994-10-20 10:15:00	2021-08-06 09:45:00	1990-06-06 22:15:00	1900-08-30	sswss	62	2015-07-17 07:30:00	1985-08-14 21:00:00	2009-07-06 14:00:00	2012-08-27 14:30:00	1992-08-22 21:45:00	1900-09-10	sssss	35.0719
13010	2007-03-07 05:30:00	2020-08-12 06:30:00	2011-08-06 23:30:00	2019-08-09 15:45:00	2005-01-08 08:00:00	1900-08-15 12:00:00	wsssw	84	2019-08-09 16:15:00	2005-01-08 08:00:00	2011-08-06 23:45:00	2007-03-07 05:30:00	2020-10-22 04:30:00	1900-08-16 12:00:00	swsww	0.680982
13012	1999-12-22 12:15:00	2015-12-30 08:15:00	2002-11-03 01:45:00	1997-11-18 14:15:00	2018-11-28 23:00:00	1900-08-31 12:00:00	wwwww	73	2015-12-30 13:15:00	2018-11-28 23:00:00	2015-07-17 15:00:00	2002-11-03 01:45:00	1997-11-18 14:15:00	1900-09-08	wwsww	0.226061
13017	2011-07-06 10:30:00	2019-08-09 14:30:00	2007-01-11 02:45:00	2005-01-08 07:00:00	2020-08-12 05:45:00	1900-09-02	sswws	94	2011-07-06 10:30:00	2020-10-03 19:00:00	2009-09-03 19:45:00	2009-11-01 16:15:00	2007-01-11 02:45:00	1900-08-09	swsww	4.85714
14001	2002-07-31 01:30:00	2008-08-10 02:30:00	2000-10-09 18:00:00	1999-12-24 21:45:00	1995-11-15 10:30:00	1900-07-17 12:00:00	sswww	93	2009-07-06 11:30:00	2008-08-10 02:30:00	2002-07-31 01:30:00	2013-05-20 16:30:00	2009-11-01 15:30:00	1900-07-12 12:00:00	ssssw	0.846154
14002	2021-07-28 00:15:00	1991-11-18 20:30:00	2002-07-30 23:15:00	2004-08-16 17:00:00	2008-08-13	1900-08-15 12:00:00	swsss	77	2021-07-28 00:15:00	2004-08-16 17:00:00	2019-08-10 22:45:00	2009-09-04 08:30:00	2002-07-30 23:15:00	1900-08-17	sssss	1.59504
14005	1993-10-07 12:30:00	1998-04-03 11:45:00	1992-03-31 16:15:00	2009-11-01 17:45:00	2002-12-01 11:15:00	1900-10-11 12:00:00	wwwww	122	1993-10-07 12:30:00	1993-01-15 17:00:00	1992-04-01 04:15:00	2008-08-13 19:00:00	2012-12-21 04:15:00	1900-10-06	wwwsw	0.188525
14009	2009-07-06 10:30:00	2016-08-03 07:00:00	2005-06-04 16:00:00	2005-10-24 13:00:00	2001-10-08 00:30:00	1900-08-17	sssww	103	2000-04-26 21:15:00	2005-10-24 13:00:00	1999-09-23 05:00:00	1993-01-15 09:45:00	2005-06-04 16:00:00	1900-08-26 12:00:00	wwsws	7.05556
15003	2002-07-30 04:30:00	2010-09-29 16:15:00	2009-08-20 14:15:00	2005-11-11 12:00:00	1997-11-18 06:30:00	1900-09-21 12:00:00	sssww	92	2005-11-11 12:00:00	1993-01-17 06:15:00	1997-02-17 23:30:00	2003-11-29 18:30:00	2002-07-30 04:30:00	1900-09-25 12:00:00	wwwws	0.215088
15006	1962-09-30 10:30:00	2014-10-06 16:30:00	1952-11-07 00:45:00	1981-09-18 12:30:00	2000-09-20 08:45:00	1900-10-05	swwss	97	1993-01-17 13:30:00	2003-11-29 19:15:00	1990-01-10 15:15:00	2005-11-11 14:30:00	2006-12-13 18:45:00	1900-10-03	wwwww	0.119134
15007	2009-08-20 11:15:00	1997-11-18 03:15:00	1991-12-22 10:45:00	2004-10-21 11:00:00	2005-11-11 08:30:00	1900-08-23	swwww	102	2004-08-11 10:30:00	1993-01-16 23:00:00	2002-07-30 19:00:00	2015-07-17 07:30:00	2004-10-21 11:00:00	1900-09-20 12:00:00	swssw	0.131004
15010	2021-08-06 13:15:00	2007-10-28 07:00:00	2014-10-06 13:00:00	2009-06-17 14:45:00	2013-12-05 11:30:00	1900-09-21 12:00:00	swwsw	57	2020-08-12 06:15:00	2021-08-06 13:15:00	2021-10-31 16:30:00	2015-07-17 08:00:00	2007-10-28 07:00:00	1900-09-23 12:00:00	sswsw	6.39604
15011	2007-06-22 16:15:00	2015-11-08 15:00:00	2009-07-03 20:15:00	1994-08-23 10:15:00	2012-08-17 09:45:00	1900-07-23 12:00:00	swsss	84	2002-07-30 17:00:00	1997-02-19 16:45:00	2007-06-22 16:15:00	2004-08-09 11:45:00	2010-10-29 20:00:00	1900-08-23	swssw	2.90902
15012	2020-11-05 19:45:00	2000-02-27 06:45:00	2001-02-11 14:30:00	2015-12-30 04:00:00	1997-02-17 19:45:00	1900-10-16	wwwww	116	2006-11-20 01:00:00	1995-10-26 08:00:00	2001-10-15 19:00:00	2000-01-30 21:45:00	2008-03-08 13:30:00	1900-10-25	wwwww	1.39906
15013	2006-09-01 12:30:00	2015-06-01 22:30:00	2021-03-10 01:15:00	1994-10-20 08:00:00	1993-10-01 12:15:00	1900-09-13	sswww	92	1993-10-01 12:15:00	2015-06-01 22:30:00	2006-11-19 22:30:00	2020-02-08 22:00:00	1993-01-15 09:30:00	1900-09-28	wswww	30.7037
15014	2006-08-19 15:45:00	2009-06-13 22:00:00	2014-08-09 00:30:00	2017-06-21 21:45:00	2015-08-10 16:00:00	1900-08-13	sssss	71	2005-06-19 05:45:00	2015-08-10 16:15:00	2016-07-20 10:30:00	2012-08-15 22:00:00	2019-07-24 07:00:00	1900-09-03 12:00:00	sssss	18.9722		18.97		18.97
15015	2002-10-22 01:00:00	2006-09-01 08:00:00	2018-06-02 19:30:00	2016-07-20 10:45:00	2014-10-06 08:00:00	1900-09-01 12:00:00	wsssw	81	2001-12-03 23:15:00	2006-09-01 08:15:00	2006-11-19 21:00:00	2005-06-19 06:00:00	1999-09-20 18:00:00	1900-09-15 12:00:00	wswss	15.5891
15016	2011-12-08 14:15:00	1993-01-15 19:00:00	1998-11-10 03:15:00	2015-11-11 17:30:00	1994-01-27 11:45:00	1900-07-21	wwwww	136	1993-01-15 19:00:00	2018-09-19 10:45:00	2008-01-08 20:45:00	2011-12-08 14:15:00	2015-12-30 08:45:00	1900-04-15	wswww	0.0907066
15021	2013-12-31 10:45:00	2000-09-20 14:00:00	2011-01-15 13:30:00	2014-11-07 11:45:00	2018-12-18 21:00:00	1900-09-04	wswww	118	2016-01-07 19:30:00	2013-12-31 10:45:00	2004-08-12 02:00:00	1999-02-05 11:00:00	2012-12-23 03:45:00	1900-04-23	wwsww	0.140845
15023	2020-08-11 18:45:00	1996-01-01 19:45:00	2002-08-06 21:30:00	2007-07-01 19:00:00	2010-12-10 15:30:00	1900-09-01	swssw	89	2004-08-11 08:15:00	1996-01-01 19:45:00	2010-12-10 15:30:00	1997-02-19 15:15:00	2001-10-20 16:45:00	1900-08-05 12:00:00	swsws	2.08608
15024	1994-08-03 21:30:00	1997-11-16 16:00:00	1992-02-12 13:45:00	2002-07-30 15:30:00	2011-09-21 12:15:00	1900-08-07 12:00:00	swwss	73	2007-07-14 01:30:00	2004-08-18 17:15:00	1992-02-12 13:45:00	2002-07-30 15:30:00	1997-05-18 16:00:00	1900-09-04	sswss	0.432011
15025	2007-10-28 06:45:00	2005-06-19 09:30:00	2020-07-27 18:30:00	1995-10-03 03:00:00	2018-06-16 22:30:00	1900-08-19	wssws	79	2014-10-06 12:15:00	1995-10-03 03:00:00	2004-12-23 08:30:00	2007-11-28 20:00:00	2004-05-09 20:45:00	1900-09-05 12:00:00	wwwws	6.11384
15028	2013-05-03 17:45:00	2021-05-12 19:00:00	2015-07-17 05:45:00	2020-02-08 22:00:00	2008-12-12 21:30:00	1900-07-24	sssww	122	2004-08-11 11:15:00	1993-01-15 10:30:00	2005-01-08 09:30:00	2002-02-01 13:15:00	1999-12-25 01:30:00	1900-07-25 12:00:00	swwww	1.37795
15030	1992-08-31 10:45:00	2020-10-04	2002-07-31 04:30:00	2001-01-22 18:15:00	2006-10-26 07:30:00	1900-08-29 12:00:00	swsww	119	2016-01-07 15:45:00	2020-10-04	1992-08-31 10:45:00	1994-01-03 21:45:00	1993-01-15 12:00:00	1900-06-23	wwsww	0.535354
15034	2009-07-02 19:30:00	2014-07-06 22:30:00	2005-09-01 00:15:00	2019-07-24 07:30:00	2018-09-16 06:00:00	1900-09-05	sssss	69	2002-07-30 20:00:00	2018-09-16 06:00:00	2010-10-29 21:15:00	2011-10-29 18:00:00	2015-12-22 09:15:00	1900-09-21	sswww	14.4623
15039	2014-07-06 21:00:00	2018-06-03 15:30:00	2002-08-06 20:00:00	2021-08-06 12:00:00	2005-06-19 06:00:00	1900-08-06	sssss	63	2019-07-24 07:15:00	2014-07-06 21:00:00	2015-08-10 17:00:00	2004-08-06 03:00:00	2005-06-19 06:00:00	1900-08-28 12:00:00	sssss	33.2536
15046	2019-07-11 21:30:00	2011-07-16 16:15:00	2012-08-21 18:15:00	2015-07-17 04:30:00	2010-07-14 23:45:00	1900-07-17	sssss	88	2015-12-04 23:30:00	2019-07-11 21:30:00	2011-01-15 13:45:00	2013-01-29 00:30:00	2020-02-15 18:30:00	1900-07-14	wswww	6.68421
16001	2004-09-13 03:30:00	2012-08-04 22:00:00	2020-09-30 15:45:00	2019-02-08 11:15:00	2015-07-17 06:45:00	1900-08-04	sssws	77	1991-01-01 19:45:00	2005-06-19 09:30:00	2004-09-13 03:30:00	1992-05-12 01:30:00	2012-08-04 22:00:00	1900-08-05	wssss	0.958889
16003	2001-07-04 01:15:00	2012-08-04 18:15:00	1992-08-03 02:45:00	1994-08-23 07:45:00	2014-08-02 20:30:00	1900-08-03	sssss	91	2012-08-04 18:30:00	2001-07-04 01:15:00	2015-11-08 15:00:00	2002-02-01 09:15:00	2015-07-17 03:15:00	1900-08-23	sswws	90.7037
16004	1998-10-21 00:15:00	2015-07-17 08:45:00	2008-12-13 01:45:00	1993-03-29 22:15:00	2002-10-12 05:45:00	1900-08-20	wswww	86	2020-08-12 02:15:00	1999-11-28 11:30:00	1998-10-21 00:15:00	2000-10-29 13:00:00	2006-12-13 19:30:00	1900-08-15	swwww	0.156189
16007	2001-09-30 23:45:00	2009-07-28 23:30:00	1994-10-23 04:45:00	2015-07-17 05:15:00	2008-08-09 22:00:00	1900-09-13 12:00:00	sswss	93	2002-09-10 00:15:00	2020-08-12 03:45:00	2008-08-09 22:00:00	2001-09-30 23:45:00	2016-01-26 11:15:00	1900-08-11 12:00:00	ssssw	3.11159
17001	2016-04-01 19:15:00	2002-07-30 18:00:00	2004-08-06 03:30:00	2005-09-23 08:45:00	2007-06-20 10:15:00	1900-08-02	wssss	98	2013-04-17 15:15:00	2011-02-03 20:45:00	2011-10-17 15:45:00	2006-12-13 19:45:00	1998-10-21 02:45:00	1900-08-10	wwwww	6.24378
17003	2001-07-04 01:00:00	2018-06-02 17:15:00	2011-07-06 06:15:00	1999-05-12 19:45:00	2021-07-03 18:00:00	1900-07-19	sssss	43	2001-07-04 01:00:00	1999-05-12 19:45:00	2002-08-07 03:00:00	2018-06-02 17:15:00	2005-06-30 18:30:00	1900-07-19	sssss	2.45679
17004	2011-02-07 12:00:00	2010-07-21 05:00:00	2008-08-10 01:00:00	2012-01-04 23:30:00	2012-10-17 13:45:00	1900-07-16	wssww	86	2011-02-07 12:30:00	1999-12-03 10:30:00	2006-03-21 12:30:00	2012-01-04 23:30:00	1999-09-29 06:15:00	1900-07-20	wwwws	0.218391
17005	2019-08-04 17:15:00	1997-08-13 19:00:00	2008-08-01 10:00:00	1993-07-16 17:00:00	2020-08-12 05:00:00	1900-08-01	sssss	66	2020-08-12 05:00:00	1997-08-13 19:00:00	2000-10-29 05:30:00	1999-12-03 07:15:00	2008-08-01 10:00:00	1900-08-10	sswws	5.74405
17008	2020-08-12 01:30:00	2008-04-28 10:30:00	1998-03-29 22:00:00	2015-07-17 06:45:00	1997-02-27 16:45:00	1900-07-29	swwsw	96	2006-12-13 17:00:00	2015-12-05 08:15:00	1998-11-22 03:00:00	2008-01-25 03:15:00	1998-02-11 09:00:00	1900-09-10	wwwww	0.505576
17015	1992-11-01 03:45:00	2007-06-23 17:45:00	1997-09-16 13:00:00	2003-05-24 17:00:00	1998-07-06 22:15:00	1900-07-26	wssss	82	1998-07-06 22:15:00	1993-01-23 20:45:00	2002-09-10 01:30:00	1997-09-16 13:00:00	2000-09-22 10:00:00	1900-09-16	swsss	1.65517
17018	2000-12-12 07:00:00	2014-10-28 11:00:00	2013-10-22 03:15:00	2019-08-09 14:30:00	2002-09-08 12:00:00	1900-10-22	wwwss	125	2000-12-12 07:00:00	2009-11-01 15:30:00	2013-10-22 03:30:00	2014-10-28 11:00:00	2002-09-08 12:00:00	1900-10-22	wwwwss	2.55102
18001	2003-03-02 07:15:00	1997-05-04 11:45:00	2015-07-17 05:45:00	2011-09-25 20:00:00	2015-10-28 16:45:00	1900-08-10	wsssw	88	2003-03-02 07:15:00	2015-07-17 05:45:00	1994-12-28 18:45:00	2004-10-21 08:15:00	2015-10-28 16:45:00	1900-09-08	wswww	1.33754
18002	2002-07-30 20:00:00	2004-08-09 18:00:00	2009-09-10 09:30:00	1992-10-01 08:45:00	2020-08-04 18:30:00	1900-09-10	sssws	90	2004-08-09 18:00:00	2002-07-30 20:45:00	2020-08-04 18:30:00	2012-08-29 18:00:00	2009-11-19 08:45:00	1900-08-30	ssssw	0.193428
18003	2001-07-04 02:30:00	2004-08-18 18:30:00	1992-08-03 04:00:00	2019-08-09 14:00:00	2016-09-13 04:30:00	1900-08-09	sssss	82	2004-08-18 18:45:00	2001-07-04 02:30:00	2010-09-09 12:15:00	2005-11-11 06:15:00	2008-08-01 11:00:00	1900-08-15	sssws	2.54308
18005	2011-09-25 21:00:00	1998-09-01 15:30:00	1998-12-08 05:00:00	2012-08-29 15:45:00	2008-08-01 12:00:00	1900-07-17	sswss	72	2011-09-25 21:00:00	2012-08-29 15:45:00	2006-06-20 22:15:00	1998-09-01 15:30:00	2016-04-01 19:30:00	1900-08-10	ssssw	2.8796
18008	2016-01-29 06:45:00	2020-01-07 20:15:00	2021-10-26 22:30:00	2008-12-19 16:45:00	1993-01-17 02:45:00	1900-10-05	wwwww	137	1993-01-17 03:00:00	2016-01-29 06:45:00	2000-06-13 06:15:00	2013-05-09 08:45:00	2011-12-08 10:00:00	1900-06-14	wwssw	0.0644897
18010	2018-09-18 23:30:00	2017-09-25 09:00:00	2018-10-10 10:00:00	2019-10-07 21:30:00	2012-12-28 12:00:00	1900-09-16	sswww	100	2018-10-10 10:00:00	2018-09-18 23:30:00	2017-09-25 09:00:00	2008-02-21 22:45:00	2006-09-07 11:00:00	1900-09-07	wssws	1.46603
18011	2012-07-18 10:15:00	2004-10-21 08:30:00	2002-07-30 19:00:00	2018-01-03 16:45:00	1993-01-15 09:30:00	1900-08-05	swsww	84	2004-08-18 19:30:00	2008-08-01 11:45:00	2002-07-30 19:00:00	2001-07-04 03:45:00	2016-03-01 02:15:00	1900-08-04	ssssw	0.188909
18013	1998-07-31 22:30:00	1996-03-12 00:45:00	2011-02-04 20:30:00	2004-10-25 01:00:00	2020-08-12 07:45:00	1900-08-13	swwws	70	2011-02-04 20:30:00	2004-10-25 01:00:00	2020-08-12 07:45:00	1999-11-28 11:45:00	1993-01-23 21:15:00	1900-09-24	wwsww	0.568066
18014	2009-03-10 12:45:00	2004-01-11 06:15:00	2013-12-14 12:45:00	2002-07-30 19:00:00	1996-08-23 18:30:00	1900-07-02 12:00:00	wwwss	108	1993-01-16 12:30:00	2016-01-26 09:30:00	2008-01-05 21:15:00	1995-01-31 05:00:00	2002-07-30 19:00:00	1900-07-28 12:00:00	wwwws	1.04412
18020	2018-09-16 10:30:00	1997-12-10 14:00:00	2019-09-25 09:30:00	2009-07-03 15:15:00	2000-03-04 10:45:00	1900-08-17 12:00:00	swssw	93	2002-07-30 15:00:00	2019-08-09 12:45:00	2006-12-13 11:15:00	1998-10-20 20:15:00	1993-01-09 04:30:00	1900-08-01	sswww	15
18021	2019-02-01 03:45:00	2018-09-16 10:30:00	2005-01-19 11:15:00	2007-03-11 22:15:00	2002-07-30 13:45:00	1900-07-14	wswws	116	2002-07-30 13:45:00	1993-01-09 04:15:00	2012-11-19 06:45:00	2005-06-19 06:15:00	2009-09-08 07:15:00	1900-09-04 12:00:00	swwss	12.5
18022	2006-09-28 20:30:00	2008-01-07 16:45:00	2018-11-15 17:45:00	2002-12-04 10:30:00	2006-12-13 20:15:00	1900-10-29	swwww	106	2006-12-13 20:15:00	2002-02-07 11:15:00	2008-10-25 16:15:00	2010-04-07 00:45:00	2002-12-04 10:30:00	1900-10-23	wwwww	0.210366
19001	2002-07-30 16:15:00	2000-08-02 18:15:00	2021-07-04 18:30:00	1997-08-13 23:30:00	2010-06-05 22:00:00	1900-07-30	sssss	91	2002-07-30 17:00:00	2008-08-10 01:45:00	1994-03-14 07:30:00	1997-08-13 23:30:00	2018-06-20 02:45:00	1900-08-11	sswss	1.40211
19004	2016-06-07 12:30:00	2009-07-06 14:30:00	2019-06-24 16:15:00	2010-09-23 03:00:00	2012-08-29 14:45:00	1900-07-16	sssss	76	2016-06-07 12:30:00	2006-05-22 22:45:00	2012-08-29 14:45:00	2000-08-20 17:00:00	2010-09-23 03:00:00	1900-07-06	sssss	12.1519
19005	2021-07-04 15:45:00	2000-07-28 18:45:00	2009-06-14 16:45:00	2013-07-23 19:00:00	2002-07-30 13:00:00	1900-07-29	sssss	76	2002-07-30 14:45:00	2021-07-04 15:45:00	2008-08-10	2000-08-02 16:00:00	2009-06-14 16:45:00	1900-08-10	sssss	11.7571
19006	2004-08-11 22:00:00	2000-08-02 17:00:00	2009-07-16 19:30:00	2014-05-25 12:45:00	2007-07-23 21:45:00	1900-07-23	sssss	74	2004-08-11 22:00:00	2011-07-16 19:00:00	2019-06-24 15:30:00	2000-08-02 17:15:00	2021-07-04 16:45:00	1900-07-16	sssss	7.21633		7.22		7.22
19007	2004-08-09 22:00:00	2012-08-29 17:45:00	2011-07-16 20:45:00	2014-06-04 17:15:00	1993-10-06 04:45:00	1900-07-16	ssssw	73	2012-08-29 17:45:00	2004-08-09 22:00:00	2000-04-26 22:15:00	1993-10-07 17:00:00	2001-02-06 18:45:00	1900-07-16	sswww	1.4554
19010	2011-07-08 13:45:00	2018-07-28 10:00:00	2013-07-27 16:45:00	2016-06-10 04:45:00	2000-07-27 15:00:00	1900-07-28	sssss	42	2021-07-04 17:00:00	2011-07-08 13:45:00	2014-05-25 12:30:00	2020-08-11 22:00:00	2012-08-29 14:00:00	1900-07-26	sssss	73.1667
19012	2000-08-02 17:00:00	2011-07-16 18:15:00	2004-08-11 21:00:00	2007-07-01 12:15:00	2005-03-30 13:45:00	1900-07-03 12:00:00	ssssw	84	2011-07-16 18:15:00	2004-08-11 21:00:00	2019-06-24 14:30:00	2000-08-02 17:15:00	2007-07-01 12:15:00	1900-08-07 12:00:00	sssss	4.3033
19014	2013-07-23 19:30:00	2010-06-05 17:45:00	2016-07-20 08:30:00	2006-07-26 06:15:00	2002-07-30 13:45:00	1900-07-27 12:00:00	sssss	43	2002-07-30 13:45:00	2008-08-10 00:15:00	2013-07-23 19:30:00	2020-08-27 17:30:00	2014-05-25 13:15:00	1900-08-06 12:00:00	sssss	23.9375
19017	2021-07-04 16:15:00	2016-06-25 00:45:00	2006-07-02 14:30:00	2000-08-02 16:30:00	1995-07-14 13:30:00	1900-07-29 12:00:00	sssss	52	2021-07-04 16:15:00	2019-06-24 14:00:00	2000-08-02 16:30:00	2016-06-25 00:45:00	2011-07-08 14:15:00	1900-07-11	sssss	76.1		76.1		76.1`
19020	1998-09-02 16:45:00	2021-08-09 13:30:00	2019-08-07 18:30:00	2008-08-19 22:00:00	2018-09-19 11:00:00	1900-08-04	sssss	64	1997-08-13 16:30:00	2020-08-04 15:30:00	2003-09-21 23:30:00	1998-09-02 16:45:00	2010-10-30 01:15:00	1900-08-10	ssssw	4.44681
19021	2012-08-05 12:00:00	2013-05-20 18:15:00	2018-06-19 22:30:00	2006-07-02 14:45:00	2008-07-29 21:00:00	1900-07-16	sssss	57	1993-10-07 17:45:00	2000-04-26 20:00:00	2014-12-22 03:30:00	2011-10-17 15:45:00	2014-06-04 16:15:00	1900-08-10	wwwws	1.69347
20001	2020-08-12 02:15:00	2008-04-28 00:15:00	2000-08-28 11:45:00	2021-10-05 17:45:00	2014-06-04 18:15:00	1900-09-03	swsws	106	2020-08-12 02:15:00	1993-10-06 07:00:00	2014-06-04 18:30:00	2021-10-05 19:15:00	2000-10-09 22:00:00	1900-09-23	swsww	10.7578		10.75		10.75
20002	2011-10-17 17:45:00	2007-07-22 03:30:00	2011-02-07 08:15:00	2015-12-03 21:15:00	2008-01-10 13:00:00	1900-08-01 12:00:00	wswww	88	2011-10-17 17:30:00	2018-01-24 07:15:00	2007-07-22 03:30:00	2021-10-28 07:45:00	2019-10-19 08:15:00	1900-09-08	wwsww	0.423077
20003	2020-08-11 22:15:00	2008-04-27 20:30:00	2000-08-28 10:15:00	2005-10-30 14:30:00	1998-04-06 21:45:00	1900-09-03	swsww	84	2020-08-11 22:15:00	2008-04-27 20:30:00	1993-10-06 06:30:00	2012-09-26 10:30:00	2000-08-28 10:15:00	1900-09-03	swwss	6.44531
20007	2011-07-09 06:30:00	2000-11-06 17:00:00	2013-05-20 20:15:00	2000-08-28 08:30:00	2016-07-20 21:15:00	1900-08-29	swsss	90	2000-11-06 17:00:00	2008-08-07 01:00:00	2010-01-16 09:00:00	2020-12-04 19:00:00	2011-07-09 06:30:00	1900-08-31	wswws	6.73418
21003	1959-07-27 14:15:00	2004-08-09 04:00:00	1970-09-08 14:15:00	1972-05-26 03:15:00	1961-01-27 13:15:00	1900-08-18 12:00:00	ssssw	86	1979-01-07 12:30:00	1965-11-01 00:30:00	1962-08-03 19:00:00	1959-07-27 14:15:00	1982-12-19 14:45:00	1900-09-27	wwssw	1.87102
21005	2004-08-09 02:45:00	2018-09-19 14:00:00	1996-10-24 23:30:00	2015-06-01 21:45:00	1998-08-17 04:30:00	1900-08-14	sswss	77	2004-08-09 02:45:00	2000-09-11 11:45:00	1987-10-18 14:45:00	2021-02-20 23:00:00	2018-09-19 14:00:00	1900-08-17	sswss	5.02287		5.02		5.02
21006	2004-08-04 04:30:00	1986-07-31 01:00:00	1987-07-10 17:30:00	1988-07-10 09:45:00	1989-09-18 20:15:00	1900-07-22	sssss	78	2004-08-04 04:30:00	2002-03-04 06:45:00	2003-05-30 16:15:00	2007-02-27 09:45:00	2000-09-11 10:00:00	1900-08-04	swsws	10.8039
21007	1967-07-14 15:45:00	1963-03-05 19:45:00	2008-05-10 18:45:00	2020-03-03 17:15:00	1983-10-04 07:45:00	1900-08-06 12:00:00	swsww	84	2003-05-30 16:45:00	1963-03-05 19:45:00	1976-01-02 20:15:00	1967-07-14 15:45:00	1975-05-13 19:45:00	1900-08-14 12:00:00	swwss	9.47059
21008	2005-06-28 04:00:00	2013-04-14 12:15:00	2009-03-08 03:00:00	2007-06-16 22:15:00	2016-12-23 17:00:00	1900-08-20	swwsw	108	2005-06-28 04:00:00	1991-02-24 03:00:00	2020-02-15 23:15:00	2007-06-16 22:15:00	2016-12-23 17:00:00	1900-03-10	swwsw	16.3938
21009	1985-12-21 09:30:00	2001-03-07 12:45:00	2011-10-18 01:30:00	1982-12-19 17:45:00	2016-12-23 22:15:00	1900-09-19	wwwww	106	1985-12-21 09:30:00	1982-01-11 11:30:00	1959-10-27 12:15:00	1962-08-04 06:45:00	1985-07-27 02:30:00	1900-10-11	wwwss	1.23188
21011	2008-05-10 17:30:00	2003-05-30 15:45:00	1997-06-13 16:15:00	2007-06-22 18:00:00	2004-08-09 17:15:00	1900-08-06	sssss	74	2003-05-30 15:45:00	2008-05-10 17:30:00	2005-01-08 06:45:00	2015-12-30 12:00:00	2009-11-19 20:45:00	1900-07-11 12:00:00	sswww	14.1167
21012	2000-07-09 18:30:00	1988-07-10 07:30:00	2013-04-14 08:15:00	2002-08-30 15:15:00	2004-08-09 17:30:00	1900-08-15	sswss	66	2007-06-16 18:15:00	2013-04-14 08:15:00	2000-07-09 18:30:00	2004-08-09 17:45:00	2016-01-27 09:15:00	1900-08-18	swssw	13.4591
21013	2002-01-03 16:45:00	1972-12-12 02:15:00	2012-08-29 15:00:00	1988-07-22 04:15:00	1974-01-05 17:15:00	1900-07-30	wwssw	92	1984-11-03 21:45:00	1972-12-12 02:15:00	2012-08-29 15:00:00	2002-01-03 16:45:00	1986-03-04 19:45:00	1900-09-24	wwsww	7.13665
21014	2004-08-09	2011-05-07 02:30:00	1996-07-03 11:30:00	2002-08-07 08:30:00	1997-10-10 04:15:00	1900-07-26	ssssw	48	2004-08-09	2015-12-30 08:45:00	1987-10-18 06:45:00	2013-12-30 10:45:00	1996-10-24 21:15:00	1900-08-15	swwww	4.65056		4.65		4.65
21015	2009-06-14 22:30:00	2002-10-20 19:00:00	1990-09-24 16:45:00	2021-10-05 15:15:00	1992-08-30 11:45:00	1900-08-29	swsws	56	2002-10-20 19:00:00	1990-10-06 20:15:00	1990-09-24 16:45:00	2009-06-14 22:30:00	1992-08-30 11:45:00	1900-09-14	wwsss	21.2353
21016	1986-06-17 14:15:00	2000-08-28 10:30:00	1987-08-17 17:30:00	2019-07-11 17:00:00	1988-04-18 20:45:00	1900-08-03	ssssw	100	1987-08-17 17:30:00	2000-08-28 10:30:00	1984-11-03 13:15:00	1986-06-17 14:15:00	2021-12-04 22:00:00	1900-08-18	sswsw	23.9545
21017	2017-05-27 16:15:00	2008-08-01 06:00:00	2018-06-02 15:15:00	2007-07-18 15:00:00	2002-05-13 18:45:00	1900-08-06	sssss	75	2017-05-27 16:15:00	2008-08-01 06:00:00	2005-10-11 20:00:00	2007-07-18 15:00:00	2009-07-29 00:30:00	1900-09-11	sswss	117.056		117.05		117.05
21018	2021-11-10 12:30:00	2003-05-30 16:30:00	1998-07-31 21:30:00	1999-11-05 10:30:00	2001-08-20 12:30:00	1900-08-09	wssws	89	2021-11-10 12:30:00	2003-05-30 16:30:00	2001-08-20 12:30:00	1998-07-31 21:30:00	1999-11-05 11:00:00	1900-08-10	wsssw	4.90811
21019	2000-07-29 19:15:00	2006-08-18 16:30:00	2007-10-28 06:45:00	1992-08-13	2001-09-30 23:45:00	1900-08-15	sswss	68	2005-10-11 22:15:00	2000-09-11 10:00:00	2015-12-30 09:15:00	2011-12-08 11:00:00	2018-01-24 06:00:00	1900-07-20	wswww	0.857383
21020	2008-05-10 15:30:00	1998-07-31 17:45:00	2007-07-03 19:15:00	2012-08-29 11:30:00	2016-12-23 13:00:00	1900-07-13	ssssw	66	2008-05-10 15:45:00	1997-02-19 16:30:00	2002-03-10 12:00:00	1986-10-04 19:15:00	2015-12-30 07:45:00	1900-08-10	swwww	0.754972
21021	2005-04-18 17:30:00	1989-01-18 08:15:00	1985-07-26 19:45:00	1997-12-18 23:00:00	1982-12-19 14:00:00	1900-08-25 12:00:00	wwsww	108	2005-04-18 17:30:00	1982-12-19 14:00:00	1989-01-18 08:15:00	1985-07-26 19:45:00	1997-12-11 11:00:00	1900-08-25 12:00:00	wwwsw	2.05944
21023	2007-12-22 14:15:00	1990-10-06 20:45:00	1994-12-08 14:30:00	2010-12-10 20:00:00	1993-12-29 18:00:00	1900-07-30	wwwww	124	2010-12-10 20:00:00	2000-11-07 02:45:00	2016-01-27 15:45:00	2007-12-22 14:15:00	1993-01-24 05:00:00	1900-05-02	wwwww	2.54478
21024	2000-07-09 20:15:00	2020-07-27 19:30:00	2015-07-17 11:45:00	2019-07-31 14:00:00	2011-09-06 09:00:00	1900-08-13	sssss	59	2016-06-07 15:45:00	2012-08-05 08:00:00	2011-09-06 09:00:00	2014-08-08 21:00:00	2016-12-23 15:00:00	1900-08-08	ssssw	7.54545
21025	2003-05-30 22:00:00	1993-10-03 01:45:00	2004-08-04 09:30:00	2013-04-14 13:15:00	2015-05-03 17:45:00	1900-08-05	swsws	89	2003-05-30 22:00:00	2012-08-05 08:30:00	2007-06-22 17:45:00	2013-04-14 13:15:00	1993-10-03 01:45:00	1900-07-21	sssww	19.1277
21026	1992-08-03 02:45:00	2018-08-12 22:15:00	1988-07-10 03:15:00	1997-07-03 17:30:00	2010-12-10 17:15:00	1900-08-14	ssssw	99	2005-10-30 12:45:00	2008-08-06 22:45:00	2015-11-08 15:45:00	1992-08-03 02:45:00	2004-08-09 15:15:00	1900-08-17	wswss	14.1739
21027	2013-05-21 02:30:00	2002-11-02 23:45:00	2002-07-31 02:30:00	1990-10-06 17:45:00	2014-06-13 17:00:00	1900-07-17	swsws	82	2002-11-02 23:45:00	2002-07-31 02:30:00	1987-06-06 06:00:00	2012-06-16 20:00:00	1998-11-03 03:00:00	1900-08-03 12:00:00	wsssw	1.34652
77002	2019-08-06 06:00:00	2009-07-15 23:15:00	2002-07-30 17:30:00	1996-10-12 06:30:00	1995-10-03 06:30:00	1900-08-02	sssww	85	2002-07-30 17:30:00	2005-10-11 22:30:00	1995-10-03 06:30:00	2002-10-27 07:45:00	1991-07-20 18:15:00	1900-08-24	swwws	8.16038
77003	1993-11-09 17:45:00	2002-08-02 14:30:00	1997-11-18 11:00:00	2012-08-04 17:15:00	2019-07-27 16:30:00	1900-08-10	wswss	94	2002-08-02 14:30:00	1988-07-22 05:15:00	2004-08-09 17:45:00	2008-08-01 09:30:00	2000-07-09 20:45:00	1900-08-05	sssss	10.4869
77004	2002-09-07 07:15:00	2010-08-10 13:45:00	1995-10-03 06:00:00	2009-07-27 07:30:00	1989-09-21 07:15:00	1900-08-14	sswss	73	2007-06-28 19:30:00	2004-08-08 23:30:00	2002-08-02 15:15:00	2000-08-18 02:00:00	2011-07-16 09:00:00	1900-08-19	sssss	14.0323
78003	1989-08-21 01:00:00	2016-12-23 15:00:00	1990-10-03 00:15:00	2005-10-24 11:45:00	2000-10-25 00:15:00	1900-07-31	swwww	73	2013-04-14 12:30:00	1999-07-10 18:15:00	2015-06-01 22:00:00	2007-10-28 11:45:00	2004-08-18 20:00:00	1900-09-06	wssws	0.354949
78004	1989-05-03 10:15:00	2002-05-13 20:45:00	1996-05-22 17:00:00	1998-09-08 04:15:00	2005-04-06 04:00:00	1900-06-19	ssssw	87	1992-01-01 18:15:00	1989-05-03 10:15:00	2015-06-01 20:00:00	2014-03-20 14:45:00	2000-08-14 00:45:00	1900-07-23	wssws	28.8286
78005	2012-08-27 15:15:00	2004-08-08 23:30:00	2015-06-01 21:00:00	1990-06-06 18:15:00	1994-09-06 13:15:00	1900-08-04	sssss	81	1992-08-03 06:00:00	2012-08-27 15:15:00	1990-06-06 18:30:00	2015-06-01 21:00:00	2004-08-08 23:30:00	1900-08-02	sssss	2.01685
78006	2002-07-30 18:15:00	1995-01-31 07:00:00	2015-06-01 19:15:00	1988-02-01 11:30:00	2005-08-24 07:15:00	1900-08-09	swsws	104	1995-01-31 07:00:00	1997-11-18 06:45:00	1991-11-10 20:30:00	1996-10-27 05:15:00	1995-10-24 21:15:00	1900-10-21	wwwww	0.847887
79002	2001-05-14 14:30:00	1999-01-13 11:45:00	2000-02-10 11:00:00	1988-12-18 20:30:00	1963-09-26 04:45:00	1900-09-21 12:00:00	swwws	118	2000-02-10 11:00:00	1967-02-27 14:15:00	1999-01-13 11:45:00	1972-12-11 18:45:00	1962-08-03 17:30:00	1900-10-01	wwwws	11.8134
79003	1993-03-18 14:30:00	1988-12-18 16:45:00	1988-02-01 09:00:00	2005-11-07 20:45:00	2015-06-01 18:45:00	1900-08-10	wwwws	109	1993-03-31 13:30:00	2013-12-30 11:00:00	1988-02-01 09:00:00	1988-12-18 16:45:00	2015-12-30 12:00:00	1900-08-22	wwwww	2.60916
79004	2007-06-12 15:30:00	2008-05-10 18:45:00	2015-07-17 05:15:00	2013-10-03 00:45:00	1988-07-10 03:45:00	1900-08-04	sssws	75	1990-06-06 16:45:00	2001-07-03 23:45:00	2015-07-17 05:15:00	2014-03-20 11:45:00	2007-06-12 15:30:00	1900-08-23	sssws	64.1698
79005	1979-10-19 08:45:00	1982-11-12 09:15:00	1970-08-16 10:00:00	1971-10-17 13:45:00	1987-04-10 19:00:00	1900-08-16	wwsww	80	1982-11-12 09:30:00	2018-08-12 22:30:00	1985-09-21 07:30:00	2020-06-16 21:45:00	1990-08-29 14:45:00	1900-09-20 12:00:00	wssss	0.724129
79006	1968-09-12 09:45:00	2001-07-04 00:45:00	1972-11-09 15:00:00	1982-10-26 13:30:00	2015-06-01 20:00:00	1900-09-15 12:00:00	sswws	93	2001-07-04 01:00:00	1985-09-21 07:45:00	2018-11-29 12:15:00	2003-01-17 05:30:00	1967-10-20 09:15:00	1900-10-04 12:00:00	sswww	2.83816
80001	1999-07-10 21:30:00	1995-03-01 06:15:00	2003-01-17 07:15:00	1992-03-09 12:15:00	1995-10-13 00:15:00	1900-06-22	swwww	95	1999-07-10 21:30:00	2015-12-30 12:00:00	2001-07-04 02:45:00	2019-12-10 18:00:00	2011-01-11 04:00:00	1900-07-10	swsww	18.2447		18.24		18.24
80002	1994-04-05 04:45:00	1988-02-24 15:30:00	1989-02-12 06:15:00	1990-08-23 05:30:00	1990-11-03 06:15:00	1900-06-05	wwwsw	117	1994-04-05 04:45:00	2007-12-27 08:30:00	2009-11-05 17:00:00	2008-12-05 08:30:00	2013-11-20 07:45:00	1900-08-04	wwwww	0.582903
80003	2006-07-31 18:45:00	2012-08-04 14:30:00	2007-07-19 13:45:00	2000-09-11 04:30:00	1991-09-21 14:15:00	1900-09-07	sssss	53	2012-08-04 14:30:00	2006-07-31 18:45:00	1992-08-02 23:45:00	1991-09-21 14:15:00	2002-09-07 14:30:00	1900-08-27	sssss	18.2
80004	2010-01-16 03:30:00	2003-01-12 19:00:00	2020-08-12 18:15:00	2012-08-04 14:45:00	2002-09-07 14:15:00	1900-08-24	wwsss	89	2002-09-07 14:45:00	2010-01-16 03:30:00	2003-01-12 19:00:00	1998-09-01 09:45:00	1988-09-04 23:00:00	1900-09-01	swwss	18
80005	2001-02-10 15:30:00	2012-08-29 04:45:00	2010-10-02 12:45:00	2014-08-06 18:15:00	1994-09-06 07:15:00	1900-08-26 12:00:00	wswss	67	2005-11-07 20:15:00	1994-09-06 07:15:00	2010-10-02 12:45:00	2001-02-10 15:30:00	2012-08-04 15:00:00	1900-08-18	wswws	4.35714
80006	1996-02-16 13:30:00	1998-10-17 09:45:00	2013-12-30 02:00:00	2015-12-30 02:00:00	2012-11-19 05:45:00	1900-08-14	wwwww	130	1996-02-16 13:30:00	2015-12-30 05:45:00	2009-04-27 05:30:00	1998-10-17 09:45:00	1999-12-03 03:45:00	1900-10-03	wwwww	0.316667
81002	1993-06-26 21:15:00	1979-09-01 23:15:00	1983-10-04 01:00:00	2011-08-10 08:15:00	1980-07-27 04:15:00	1900-08-01	sswss	58	1993-06-26 21:15:00	1982-10-01 20:45:00	1980-07-27 04:15:00	1978-08-02 21:30:00	1966-09-02 06:30:00	1900-08-27 12:00:00	swsss	10.5559
81003	1999-11-05 02:30:00	1995-07-11 20:00:00	2011-07-07 06:15:00	2003-11-02 01:15:00	2021-05-03 15:15:00	1900-08-30	wssws	83	1998-10-24 10:15:00	1994-10-23 01:45:00	1988-08-18 02:15:00	2021-05-03 15:15:00	1999-11-05 02:30:00	1900-10-22	wwssw	3.48815
81004	1991-11-01 06:00:00	1988-01-19 05:00:00	1989-08-11 10:15:00	1990-07-19 14:30:00	1990-10-02 18:45:00	1900-10-11	wwssw	104	1991-11-01 06:00:00	1994-12-08 07:15:00	2001-01-05 10:30:00	2016-11-12 14:15:00	2012-11-19 19:00:00	1900-10-25	wwwww	0.157661
81006	1991-08-09 05:30:00	1988-10-18 14:00:00	1991-10-16 06:00:00	2003-09-22 03:45:00	2005-09-19 17:45:00	1900-09-12	swwss	74	1993-05-17 15:15:00	2000-10-25 06:45:00	1991-10-16 06:00:00	1988-10-18 14:00:00	2020-06-17 20:00:00	1900-09-22	swwws	22.925
81007	2015-07-17 03:00:00	1998-09-01 09:45:00	1992-09-12 22:00:00	2006-09-29 14:00:00	1994-07-10 00:15:00	1900-08-29	sssss	73	1992-09-12 22:00:00	2015-07-17 03:00:00	1998-08-03 10:30:00	2002-10-24 19:15:00	2004-03-19 07:30:00	1900-08-21	sssww	2.07718
82001	1996-04-03 09:30:00	1980-07-26 03:30:00	1988-08-30 09:00:00	1980-11-14 09:00:00	2000-09-11 09:30:00	1900-08-20	wssws	112	1996-04-03 09:30:00	1985-09-21 04:30:00	2000-09-11 09:30:00	1980-11-14 09:00:00	1980-07-26 03:30:00	1900-08-31	wssws	65.1143
82002	1994-08-01 20:45:00	2000-09-11 08:45:00	1999-05-12 16:45:00	1981-09-17 23:45:00	1985-12-31 17:15:00	1900-09-17	ssssw	85	2000-09-11 08:45:00	1994-08-01 20:45:00	1981-09-20 00:45:00	1982-12-19 02:45:00	1985-12-31 17:15:00	1900-09-12	sssww	4.76296
82003	1980-07-26 04:30:00	1999-06-19 20:15:00	1991-08-09 08:15:00	2007-09-16 12:00:00	2015-06-28 11:30:00	1900-08-14	sssss	65	1979-12-19 13:30:00	2001-11-21 16:00:00	1983-10-12 09:30:00	2012-06-23 09:30:00	1982-10-17 13:30:00	1900-08-14	wwwsw	4.34957
83003	2001-07-04 01:45:00	1971-09-01 15:45:00	1993-06-09 18:45:00	2004-08-09 03:45:00	1999-05-12 16:45:00	1900-07-22	sssss	101	2001-07-04 01:45:00	1994-10-23 05:15:00	2010-01-15 22:30:00	1990-05-16 17:30:00	1971-09-01 15:45:00	1900-08-04	swwss	40.8939		40.89		40.89
83004	2008-01-26 15:30:00	2011-08-26 17:30:00	2001-07-04 01:30:00	1983-03-05 19:45:00	1988-07-22 02:30:00	1900-08-24	wssws	87	1985-09-21 02:30:00	1982-09-27 17:30:00	1980-07-26 22:30:00	2001-07-04 01:45:00	1982-11-05 22:45:00	1900-10-08	ssssw	10.8733
83005	1999-11-28 09:00:00	2015-07-17 07:30:00	2012-08-06 16:15:00	1986-05-10 05:45:00	2016-05-02 10:45:00	1900-08-19	wssss	77	1986-05-10 05:45:00	1982-11-23 10:45:00	2012-08-06 16:15:00	1999-11-28 09:00:00	1991-11-11 09:00:00	1900-09-16	swsww	6.82239
83006	2001-07-04 05:30:00	2008-08-01 12:30:00	1987-06-06 08:45:00	2012-06-22 13:30:00	2007-07-26 10:15:00	1900-08-24	sssss	70	2001-07-04 05:30:00	2007-07-26 10:15:00	2007-10-04 01:45:00	2000-09-20 06:00:00	2012-06-22 13:30:00	1900-10-03	sswss	20.5009		20.5		20.5
83007	2005-09-23 08:30:00	2014-05-19 21:45:00	1992-08-30 14:30:00	2004-05-10 00:30:00	2010-01-15 20:45:00	1900-06-29	ssssw	88	1992-08-30 14:30:00	2005-09-23 08:30:00	2019-07-31 18:45:00	2014-05-19 21:45:00	2011-02-07 07:15:00	1900-06-19	sssss	5.2971
83008	2005-05-19 13:15:00	2012-08-06 18:00:00	2016-11-16 08:15:00	2007-09-16 12:30:00	2004-04-15 11:15:00	1900-08-20 12:00:00	sswsw	96	1985-10-01 08:00:00	2000-07-29 21:15:00	1999-03-28 18:30:00	2005-05-19 13:15:00	2012-08-06 18:15:00	1900-08-17	wswss	22.225
83009	2020-09-30 11:15:00	1991-08-08 07:00:00	2019-08-30 02:45:00	2016-03-01 01:15:00	2005-09-19 16:30:00	1900-08-15	sssws	77	1987-12-27 13:45:00	1983-10-15 08:00:00	1986-08-13 23:15:00	2020-09-30 11:15:00	2016-03-01 01:15:00	1900-08-14	wwssw	16.2118
83010	2003-05-30 15:30:00	1995-09-13 16:30:00	1997-09-14 04:30:00	2002-08-06 23:45:00	2001-07-04 00:30:00	1900-09-09	sssss	79	1987-12-26 06:45:00	2007-12-02 00:30:00	1990-03-06 03:45:00	2003-09-22 00:15:00	1985-09-21 03:30:00	1900-09-21	wwwss	4.03371
83011	2000-09-11 07:45:00	2001-07-03 23:15:00	2021-12-08 12:45:00	1999-05-12 12:45:00	2017-10-04 09:45:00	1900-10-09	sswsw	67	2010-01-16 08:30:00	2000-10-25 02:15:00	1994-01-14 01:00:00	2000-09-20 05:30:00	1994-12-08 07:15:00	1900-10-09	wwwsw	1.44843
83013	2010-12-28 10:00:00	2012-08-06 14:30:00	2005-05-26 09:30:00	2015-11-12 18:00:00	2009-11-25 13:15:00	1900-10-08	wssww	74	2012-08-06 14:30:00	2005-05-26 09:30:00	2010-12-28 10:00:00	2009-11-25 13:15:00	2007-07-18 17:30:00	1900-09-30	sswws	1.34073
84001	1960-07-12 13:30:00	1985-10-01 05:45:00	1956-08-13 09:15:00	1966-09-04 06:30:00	2000-09-11 13:30:00	1900-09-04 12:00:00	swsss	105	1985-10-01 05:45:00	1960-07-12 13:30:00	1956-08-13 09:15:00	1994-02-01 11:15:00	1983-10-18 10:15:00	1900-08-12 12:00:00	wssww	2.36415
84003	1999-07-21 13:00:00	1972-01-24 11:00:00	1975-12-02 16:15:00	1968-10-03 10:00:00	1973-02-20 17:15:00	1900-08-16	swwww	110	1999-07-21 13:00:00	2008-02-05 15:15:00	2009-05-04 08:15:00	1972-01-24 11:00:00	2006-01-22 22:30:00	1900-09-11	swsww	2.14894
84004	1995-03-25 09:00:00	2017-11-07 15:30:00	2010-01-16 04:00:00	1982-12-19 09:15:00	1979-01-15 23:15:00	1900-10-03	wwwww	107	1995-03-25 09:00:00	2013-12-30 20:00:00	1981-09-20 08:30:00	1982-02-09 00:30:00	1979-11-25 18:00:00	1900-09-20	wwsww	0.793948
84005	1987-08-20 21:30:00	1985-09-21 04:00:00	2009-05-06 23:45:00	1973-12-11 11:45:00	1995-10-22 11:15:00	1900-09-10	sssww	101	1985-09-21 04:00:00	1973-12-11 11:45:00	1982-12-19 07:45:00	1987-08-20 21:30:00	1991-12-22 08:15:00	1900-09-11 12:00:00	swwsw	0.510686
84006	1976-05-22 03:00:00	1981-09-18 03:00:00	2020-08-04 13:00:00	2021-09-30 08:15:00	2009-09-08 07:15:00	1900-06-01 12:00:00	sssss	67	1981-09-18 03:00:00	1976-05-22 03:15:00	1982-09-27 15:30:00	1999-04-20 09:00:00	2020-08-04 14:15:00	1900-06-26 12:00:00	sssws	0.475884
84008	2011-08-26 16:00:00	2004-08-08 22:00:00	2020-06-10 16:15:00	1994-07-31 19:15:00	2016-07-20 09:45:00	1900-07-31	sssss	89	2008-09-02 21:15:00	2004-12-14 12:30:00	2012-08-04 19:45:00	2006-05-04 22:00:00	1994-02-01 07:15:00	1900-09-20	swssw	14.44
84009	2001-07-04 00:15:00	1978-06-22 20:15:00	2007-07-18 18:00:00	2018-06-01 16:00:00	1999-07-10 19:15:00	1900-08-05	sssss	87	2001-07-04 00:15:00	2007-07-18 18:00:00	1982-09-27 14:15:00	1982-12-19 04:15:00	2000-09-11 09:45:00	1900-08-20	sssws	14
84011	2008-07-31 04:00:00	1994-07-31 21:00:00	2014-05-20	1988-10-19 04:15:00	1981-09-17 03:45:00	1900-08-05	sssws	90	1981-01-01	1999-11-26 12:15:00	1983-02-04 18:30:00	1980-09-07 09:45:00	1986-08-14 02:45:00	1900-08-09	wwwss	34.1429
84012	1994-12-28 14:00:00	1985-09-30 23:45:00	1990-02-06 09:45:00	1981-09-20 04:30:00	1989-03-19 13:30:00	1900-09-20	wswsw	116	1994-12-28 14:00:00	1981-09-20 04:30:00	1981-10-01 09:00:00	1985-09-30 23:45:00	1979-12-26 23:45:00	1900-08-05	wswsw	3.48645
84013	1995-03-25 09:00:00	1981-01-18 00:30:00	1982-12-19 07:30:00	1987-12-26 14:15:00	1985-10-01 04:45:00	1900-09-13	wwwww	105	1981-01-18 00:30:00	1992-11-02 10:00:00	1995-03-25 09:00:00	1989-09-04 11:45:00	1985-10-01 04:45:00	1900-10-11	wwwsw	0.904294
84014	1993-07-08 18:15:00	1979-03-25 09:00:00	1997-04-24 02:00:00	1984-10-04 02:30:00	1989-09-22 09:00:00	1900-08-05	swwws	86	1994-03-03 06:00:00	2002-08-07 01:45:00	1984-01-13 03:30:00	1980-11-20 16:15:00	1979-03-08 09:00:00	1900-09-04	wswww	13.2887
84016	2002-07-30 16:15:00	2005-06-09 08:30:00	2001-07-04	1997-09-16 11:15:00	1988-08-18 15:30:00	1900-08-01	sssss	91	2002-07-30 16:15:00	1988-08-18 15:30:00	1997-09-16 11:15:00	2012-06-22 13:45:00	2005-06-09 08:30:00	1900-08-14	sssss	11.4375		11.43		11.43
84017	2008-01-13 09:00:00	1979-12-27 12:45:00	2006-09-20 09:45:00	2005-04-06 14:45:00	2015-10-24 05:45:00	1900-08-07	wwsww	91	2008-01-13 09:00:00	1979-12-27 12:45:00	1991-06-14 09:45:00	1987-08-16 05:00:00	1982-12-14 10:00:00	1900-09-08	wwssw	1.85789
84018	1995-03-25 09:00:00	1995-11-16 02:15:00	1988-07-22 10:30:00	2012-01-05 00:15:00	2007-01-03 15:30:00	1900-08-24 12:00:00	wwsww	139	1995-03-25 09:00:00	1992-05-13 00:45:00	2012-01-05 00:15:00	2012-11-22 19:15:00	1995-11-16 02:15:00	1900-03-28	wswww	1.0331
84019	2001-07-03 22:45:00	2005-06-30 17:00:00	2020-08-12 05:15:00	2016-07-20 08:45:00	1995-07-14 12:30:00	1900-08-06	sssss	60	2000-09-12 08:45:00	2001-07-03 22:45:00	1992-05-21 08:00:00	2003-11-29 19:15:00	2020-08-12 05:15:00	1900-08-06	sssws	17.6842
84020	2019-07-31 20:00:00	2015-10-06 10:30:00	2007-06-22 19:15:00	2009-05-09 14:00:00	2002-08-15 04:00:00	1900-08-26	swsss	68	2002-07-30 16:45:00	1991-01-01 16:45:00	1984-10-29 10:00:00	1986-08-16 03:00:00	2009-05-09 14:00:00	1900-09-20	swwss	20.8542
84022	1992-11-12 10:45:00	2020-06-17 22:00:00	2000-08-09 15:30:00	1994-08-24 18:30:00	1988-08-18 06:00:00	1900-08-09	wssss	80	2007-06-22 17:45:00	2010-12-28 13:00:00	1988-08-18 06:00:00	2010-01-15 19:30:00	1999-05-12 17:15:00	1900-08-05	swsws	14.8958
84023	1991-08-09 04:00:00	2000-08-02 16:45:00	1989-10-31 07:45:00	2003-01-26 05:00:00	1998-04-29 21:00:00	1900-08-09	sswww	81	2019-08-31 10:00:00	2005-06-30 17:15:00	1988-08-18 16:00:00	1993-03-17 04:00:00	1992-08-12 23:15:00	1900-08-07	sssws	0.884058
84025	2000-08-02 15:45:00	2001-07-04 01:15:00	2010-12-28 06:30:00	2002-07-30 16:00:00	2016-07-20 10:30:00	1900-08-14	sswss	67	2010-12-28 06:30:00	1986-12-30 11:45:00	2002-07-30 16:00:00	1988-11-30 01:45:00	2001-07-04 01:15:00	1900-08-14	wwsws	0.80274
84026	2021-07-04 14:00:00	1980-07-26 01:15:00	2004-08-17 14:30:00	2011-07-17 17:30:00	2008-07-03 15:30:00	1900-08-14	sssss	71	1998-09-02 17:30:00	2002-07-30 15:30:00	2000-09-24 17:30:00	1987-08-16	2011-07-17 17:30:00	1900-08-15	sssss	15.9474
84029	2003-05-30 14:30:00	1992-08-30 14:30:00	1993-09-10 19:30:00	2002-07-30 16:15:00	2015-02-28 18:15:00	1900-08-06	ssssw	94	2002-07-30 16:30:00	2003-05-30 14:45:00	2000-09-20 04:30:00	2011-10-17 15:00:00	2016-01-10 18:15:00	1900-09-17	sssww	5.77273
84035	2011-08-26 14:45:00	1997-07-13 15:45:00	2016-07-20 08:15:00	2019-08-03 18:15:00	2000-09-01 15:15:00	1900-07-27	sssss	50	2001-07-03 23:45:00	1997-07-13 15:45:00	1991-07-08 12:30:00	1994-11-14 15:30:00	2006-08-01 17:30:00	1900-08-03	sssws	27.0741
84037	2010-01-16 07:30:00	1989-09-24 15:15:00	2021-05-13 17:00:00	2001-07-04 02:30:00	1994-10-23 02:45:00	1900-07-11	wsssw	115	2010-01-16 07:30:00	2001-07-04 02:30:00	2013-12-30 08:00:00	2002-02-22 06:00:00	2015-01-15 03:45:00	1900-07-14 12:00:00	wswww	14.0797
84040	2010-12-29 18:30:00	2015-06-01 20:15:00	2007-10-28 05:15:00	2017-11-07 07:30:00	2020-08-25 14:00:00	1900-08-25	wswws	86	2015-12-30 09:45:00	2015-06-01 20:15:00	2006-11-19 21:15:00	2010-12-29 18:30:00	2009-11-19 17:45:00	1900-09-07 12:00:00	wswww	0.587826
85001	1990-07-17 05:45:00	1981-09-18 08:00:00	1978-10-03 13:15:00	1978-04-17 17:30:00	1980-05-30 14:45:00	1900-08-01	sswws	74	1992-03-18 16:00:00	1990-07-17 05:45:00	1982-07-01	2009-07-21 12:15:00	2004-03-19 04:15:00	1900-08-07	wsssw	28.2471
85002	1982-09-10 11:15:00	1985-10-01 03:15:00	1986-12-05 01:45:00	1988-10-19 04:30:00	1981-09-23 16:45:00	1900-08-22	swwws	109	1982-09-10 11:15:00	1986-12-05 01:45:00	1993-05-18 09:30:00	1981-05-01	1985-10-01 03:15:00	1900-08-23	swssw	34.3433		34.34		34.34
85003	2008-07-30 01:30:00	2005-08-31 19:00:00	2015-08-10 14:30:00	2000-09-06 05:00:00	1991-07-01 14:00:00	1900-08-19	sssss	76	2012-06-28 17:15:00	2006-09-29 16:00:00	2019-08-04 18:15:00	2005-08-31 19:00:00	2000-09-06 05:00:00	1900-09-10	sssss	7.4386
85004	2013-07-03 09:00:00	2010-09-11 06:15:00	2011-07-07 17:30:00	1994-08-24 16:15:00	1986-03-08 16:15:00	1900-08-01	ssssw	77	2000-06-08 10:45:00	1998-02-11 09:00:00	1994-08-24 16:15:00	1986-01-10 03:00:00	2000-10-17 23:45:00	1900-09-10	swsww	6.54352
88001	2010-09-11 06:00:00	2018-12-18 10:30:00	2000-09-11 07:45:00	1996-02-05 07:45:00	2010-10-01 11:00:00	1900-10-11	swsww	108	2018-12-18 10:30:00	1997-11-17 23:30:00	2012-11-19 02:15:00	1998-10-24 11:00:00	2019-10-06 01:15:00	1900-10-26	wwwww	8.50476
89002	2001-07-06 17:30:00	2004-05-10 17:15:00	1999-05-21 07:00:00	1995-03-23 09:00:00	1996-07-03 10:15:00	1900-07-04	sssws	93	2001-07-06 17:30:00	1995-03-23 09:00:00	1996-07-03 10:15:00	2004-05-10 17:15:00	2015-08-10 14:15:00	1900-09-11	swsss	27.5795
89003	2018-12-18 15:15:00	1994-08-03 20:00:00	1995-03-23 09:00:00	1996-10-04 10:30:00	2015-08-10 14:30:00	1900-08-08 12:00:00	wswws	102	1996-10-04 10:30:00	2018-12-18 15:15:00	1983-01-01 08:00:00	1995-03-23 09:00:00	1991-04-01 08:30:00	1900-09-27	wwwww	12.472
89004	2004-05-10 19:00:00	2003-04-01 01:30:00	2010-04-05 06:30:00	2013-10-03 01:30:00	2006-01-09 19:15:00	1900-07-22 12:00:00	swwww	93	1995-07-20 05:30:00	1997-04-23 15:45:00	1995-10-02 19:15:00	1999-06-19 14:30:00	1997-12-05 22:15:00	1900-08-30	swwsw	13.5
89005	2000-09-06 04:45:00	2004-10-06 05:45:00	1995-03-23 09:00:00	2006-09-01 05:30:00	2011-02-03 18:00:00	1900-08-11 12:00:00	swwsw	101	2014-10-28 05:45:00	2004-10-06 05:45:00	2010-10-29 18:00:00	1983-12-27 12:45:00	2010-09-13 15:30:00	1900-10-09	wwwws	2.28068
89006	1991-04-11 05:00:00	1992-05-05 22:00:00	1998-02-12 11:15:00	2012-11-19 05:15:00	1980-08-11 14:45:00	1900-08-10	wswws	87	1991-04-11 05:00:00	1998-02-12 11:15:00	2018-09-15 12:30:00	1992-05-05 22:00:00	2019-09-08 10:15:00	1900-09-18	wwsss	0.389558
89007	2007-06-12 18:45:00	1991-10-16 01:45:00	2000-09-06 04:15:00	1994-02-01 09:00:00	1986-08-13 22:30:00	1900-08-17	swsws	76	1983-10-15 06:45:00	2007-06-12 18:45:00	2017-08-23 04:15:00	1988-09-06 18:45:00	1991-10-16 01:45:00	1900-09-07	wsssw	19.2
89008	2018-06-03 17:30:00	2003-07-19 13:00:00	2012-06-26 16:15:00	2014-08-03 15:00:00	2021-08-08 14:45:00	1900-08-27	sssss	76	2012-06-26 16:15:00	2002-08-15 02:00:00	2004-08-09 08:30:00	1985-10-04 03:45:00	2005-08-31 17:30:00	1900-08-20	sssws	17.4667
90003	2021-08-11 16:45:00	2012-06-28 19:30:00	2013-04-14 01:45:00	2014-10-03 05:30:00	2007-07-14 02:30:00	1900-08-23 12:00:00	sswws	78	2008-07-31 04:30:00	2001-09-12 11:30:00	2001-10-01	1995-07-19 17:00:00	2020-01-02 13:15:00	1900-09-10	sswsw	10.5828
91002	1998-12-15 05:45:00	1998-03-01 06:30:00	2006-10-06 02:45:00	1980-10-28 13:15:00	1992-01-01 04:45:00	1900-08-09	wwwww	87	2012-06-28 21:45:00	1998-12-15 06:00:00	1980-07-26 02:00:00	1998-03-01 06:30:00	2017-12-06 10:15:00	1900-09-27 12:00:00	swsww	1.35751
92001	2015-01-09 01:30:00	2002-01-28 05:30:00	2016-01-29 07:15:00	2010-11-08 07:00:00	1999-11-30 03:00:00	1900-10-19 12:00:00	wwwww	124	2020-10-15 14:45:00	2002-01-28 05:30:00	2011-12-08 15:15:00	2013-12-05 06:30:00	2016-12-26 06:15:00	1900-02-16	wwwww	0.0606923
92002	2003-07-18 13:45:00	2007-06-21 15:45:00	2009-07-17 18:45:00	2012-07-22 17:15:00	2004-08-26 18:30:00	1900-08-14	sssss	66	2007-06-21 15:45:00	2005-11-14 16:45:00	2003-07-18 13:45:00	2017-08-23 05:00:00	1987-08-20 13:45:00	1900-09-10	swsss	144.5
92003	2005-11-20 13:45:00	2003-05-07 18:30:00	2004-08-10 12:45:00	2002-02-21 15:00:00	2000-09-11 09:15:00	1900-07-29	wssws	78	2005-11-11 22:15:00	2001-12-03 16:30:00	2005-01-11 14:00:00	2004-09-12 21:15:00	2000-12-02 02:45:00	1900-08-28	wwwsw	28.9194
92004	2021-10-26 22:00:00	2008-07-31 04:45:00	2009-07-26 09:45:00	2010-07-01 10:30:00	2011-05-07 20:30:00	1900-07-26	wssss	88	2014-02-06 15:45:00	2021-08-08 18:45:00	2010-12-27 15:30:00	2012-01-18 02:30:00	2019-08-31 09:15:00	1900-08-31	wswws	0.0871548
93001	2013-09-15 07:30:00	2012-01-18 01:30:00	2011-09-06 08:15:00	2014-10-19 09:00:00	2019-07-24 07:45:00	1900-09-13	swsws	107	1983-12-31 09:30:00	2007-01-15 01:00:00	1990-09-18 19:15:00	1990-12-11 09:00:00	2008-10-20 02:00:00	1900-09-14 12:00:00	wwsww	0.748072
93002	2007-06-21 18:00:00	2006-09-24 20:45:00	2004-08-18 16:45:00	2013-09-15 07:45:00	2016-06-24 19:45:00	1900-07-20	sssss	68	2005-09-13 10:45:00	2018-10-23 05:15:00	2016-02-01 02:45:00	2004-08-18 16:45:00	2013-09-15 07:45:00	1900-09-07	swwss	8.63342
94001	2009-10-03 10:45:00	2021-11-27 02:30:00	1986-11-05 06:15:00	1972-04-14 13:15:00	1972-12-11 19:15:00	1900-10-25	wwwww	107	2011-12-26 15:15:00	2015-01-12 10:30:00	2016-01-29 07:30:00	2006-12-04 05:00:00	2008-11-14 16:45:00	1900-04-15	wwwww	0.0877627
94003	2016-08-03 15:15:00	2011-12-19 15:15:00	2013-07-29 19:00:00	2021-11-04 15:15:00	2011-07-13 12:00:00	1900-08-26 12:00:00	swsws	101	2013-07-29 19:00:00	2016-08-03 15:15:00	2011-12-19 15:15:00	2014-08-11 12:45:00	2020-09-13 12:00:00	1900-08-28	sswss	1.74494
95001	2008-10-29 12:30:00	1981-09-20 17:30:00	2011-10-18 13:30:00	1991-10-18 12:30:00	2015-12-09 14:15:00	1900-10-18	wswww	85	2008-10-29 12:30:00	2002-05-28 15:15:00	1981-09-20 17:45:00	2011-10-18 13:15:00	2004-01-19 12:30:00	1900-10-04	wssww	0.545076
95002	2011-07-10 15:15:00	2003-04-01 01:00:00	2012-02-04 15:15:00	2014-08-03 19:00:00	2007-07-05 20:00:00	1900-08-25	swwss	110	2015-08-10 16:30:00	2015-12-30 04:45:00	2003-04-01 01:00:00	1990-01-14 21:15:00	1992-01-06 09:00:00	1900-09-14	swwww	21.631
95003	2015-08-10 16:30:00	2014-08-06 14:30:00	2011-07-10 06:30:00	2019-09-27 14:00:00	2021-07-10 17:15:00	1900-08-08 12:00:00	sssss	50	2014-08-06 14:30:00	2018-10-23 02:15:00	2015-08-10 16:30:00	2017-10-07 07:30:00	2011-07-10 06:30:00	1900-08-08	swsws	30.3409
95004	2017-08-25 14:30:00	2015-08-10 17:15:00	2014-08-06 14:30:00	2019-07-24 09:15:00	2010-08-23 21:15:00	1900-08-10	sssss	68	2017-08-25 14:30:00	2015-08-10 17:30:00	2019-07-24 09:15:00	2016-02-01 04:15:00	2021-10-26 11:45:00	1900-08-23	ssssw	14		14		14
95005	2006-10-26 23:15:00	2009-02-16 18:00:00	2013-12-05 02:15:00	2005-11-14 18:15:00	2019-05-26 17:00:00	1900-10-09	wwwws	129	2006-10-26 23:15:00	2009-02-16 18:00:00	2005-11-14 18:15:00	2021-11-20 09:45:00	2014-08-11 09:00:00	1900-09-15	wwwws	0.372342
95006	2014-08-11 10:30:00	2014-10-08 01:45:00	2013-09-16 21:30:00	2019-01-13 01:45:00	2016-01-29 04:45:00	1900-08-11	swsww	129	2019-01-13 03:45:00	2010-12-10 20:00:00	2014-10-08 01:45:00	2008-01-27 03:15:00	2014-08-11 10:45:00	1900-03-15	wwwws	0.196074
96001	1980-08-01 18:45:00	1988-07-07 13:00:00	1982-05-22 19:15:00	1985-12-31 13:30:00	1987-01-19 10:00:00	1900-08-01	sssww	86	1987-01-19 10:00:00	2010-01-13 14:45:00	1988-07-07 13:15:00	1980-07-26 04:00:00	1985-12-31 13:30:00	1900-08-24	wwssw	3.57878
96002	2010-01-14 11:15:00	1998-06-27 16:30:00	1996-01-02 11:00:00	1985-12-01 06:30:00	2013-05-13 23:00:00	1900-07-30	wswws	100	2010-01-14 11:15:00	1998-06-27 16:30:00	1983-10-04 18:30:00	2006-10-26 18:00:00	1985-12-01 06:30:00	1900-09-07 12:00:00	wswww	1.00644
96003	1998-06-27 18:15:00	2010-12-28 13:30:00	1996-01-02 06:45:00	1985-12-31 15:00:00	2005-06-13 04:15:00	1900-07-01	swwws	100	1998-06-27 18:30:00	2010-12-28 13:30:00	1996-01-02 06:45:00	1985-12-31 15:00:00	1989-04-12 04:30:00	1900-08-01	swwww	2.30124
96004	2002-09-25 14:15:00	2013-06-22 18:00:00	2006-07-11 07:15:00	2011-07-16 13:30:00	2007-07-03 14:45:00	1900-08-25	sssss	78	2016-07-20 04:45:00	2017-08-25 16:00:00	1995-09-08	2015-08-10 18:15:00	2014-08-11 04:45:00	1900-08-25	sssss	34.8947
96005	2015-08-10 19:00:00	2010-12-10 15:00:00	2016-11-16 03:45:00	2010-09-20 03:00:00	2011-11-23 05:15:00	1900-08-17	swwsw	77	2010-12-10 15:00:00	2016-11-16 03:45:00	2015-08-10 19:15:00	2011-11-23 05:15:00	2007-12-07 04:30:00	1900-09-15 12:00:00	wwsww	1.36256
96006	2019-07-11 16:00:00	2012-01-21 05:30:00	2014-10-28 05:30:00	2017-06-06 21:30:00	2016-01-08 03:00:00	1900-08-28	swwsw	109	2014-08-11 06:00:00	2019-07-11 16:00:00	2012-01-21 05:30:00	2021-08-04 23:15:00	2008-09-01 15:30:00	1900-08-11	sswss	0.305122
97002	2010-12-28 10:15:00	1978-02-23 05:00:00	1985-12-31 15:15:00	2010-01-14 12:30:00	2014-08-11 04:45:00	1900-09-24	wwwws	125	2006-10-26 14:00:00	1978-02-23 05:00:00	2010-01-14 12:30:00	2010-12-28 10:15:00	1985-12-31 15:15:00	1900-08-14 12:00:00	wwwww	1.0971
105001	2010-01-15 08:30:00	2008-04-25 23:30:00	2016-02-16 11:15:00	2019-02-15 22:15:00	2012-02-04 13:30:00	1900-05-27	wwwww	115	2010-01-15 08:30:00	2016-09-24 09:00:00	2001-06-19 12:30:00	2010-12-04 21:00:00	2001-10-29 03:30:00	1900-09-14	wssww	6.58974
106001	1998-07-21 20:15:00	2011-10-24 01:15:00	2000-10-03 20:45:00	1998-11-06 18:30:00	2013-12-05 05:00:00	1900-10-04	swwww	118	1998-07-21 21:00:00	2010-01-16 07:45:00	2007-08-06 22:00:00	2011-10-24 01:15:00	2000-02-10 03:45:00	1900-10-15	swsww	0.261663
106002	2021-09-09 12:45:00	2014-10-03 01:30:00	2013-08-02	2016-09-23 16:45:00	2007-10-26 07:15:00	1900-09-26	swssw	67	2013-10-22 19:45:00	2011-11-22 23:45:00	2015-03-28 07:00:00	2019-08-28 02:45:00	2013-08-02	1900-09-17	wwwss	2.24194
106003	2011-08-04 08:30:00	2013-07-26 14:15:00	2012-08-07 12:15:00	2014-07-31 07:30:00	2010-07-01 09:00:00	1900-08-08	sssss	37	2017-08-23 00:30:00	2021-11-12 10:30:00	2019-08-28 01:00:00	2014-10-19 04:00:00	2020-10-31 08:15:00	1900-08-23	swsww	38.5
107001	2007-12-03 12:00:00	2017-06-07 12:30:00	2015-01-13 00:15:00	2012-10-20 05:15:00	2006-10-26 15:15:00	1900-09-01 12:00:00	wswww	112	2005-03-16 09:00:00	2017-06-07 12:30:00	2006-10-26 15:15:00	2013-11-03 06:45:00	2011-08-28 13:00:00	1900-09-15	wswws	0.233766
108001	2002-06-26 06:15:00	2006-05-24 19:15:00	2009-10-27 11:30:00	2008-11-04 15:30:00	2003-10-22 10:30:00	1900-09-07	sswww	94	2007-08-20 10:45:00	2005-08-31 23:45:00	2008-10-04 10:45:00	2010-07-11 06:15:00	2011-12-08 14:00:00	1900-09-25	sswsw	1.19892

## Sheet: qmed
																Max for
																current		Peak 15 m for Hmax
	Level	Dates							Discharge	Dates						Rank1 Q/qmed
1001	2010-12-28 06:45:00	2012-10-20 04:30:00	1999-04-21 04:00:00	2020-02-29 08:00:00	1996-01-01 18:15:00	1900-07-09	wwwws	95	2006-10-12 01:45:00	1997-07-01 09:30:00	2010-08-05 23:30:00	2012-10-20 04:30:00	2016-06-24 15:45:00	1900-10-07	wssws	0.102121
2001	1980-07-26 04:45:00	1978-02-23 02:45:00	1981-12-13 16:30:00	2001-02-11 14:30:00	1988-10-26 04:15:00	1900-08-31	swwww	118	1980-07-26 05:00:00	1978-02-23 02:45:00	2001-02-11 14:30:00	1988-01-20 11:45:00	1980-11-24 17:15:00	1900-10-04	swwww	0.201486
2002	2013-02-05 15:15:00	2014-08-11 08:30:00	2006-10-02 05:30:00	2014-10-07 18:00:00	2002-02-22 00:45:00	1900-09-24 12:00:00	wswww	105	2013-02-05 15:15:00	2014-08-11 10:00:00	2005-11-26 02:15:00	2006-10-26 07:15:00	2002-01-28 14:15:00	1900-08-31 12:00:00	wswww	0.198858
3002	2004-09-12 06:15:00	2017-11-07 00:30:00	2016-08-08 02:45:00	2011-09-06 12:00:00	1975-07-15 01:00:00	1900-09-06	swsss	86	2018-10-23 04:45:00	2017-11-07 00:30:00	2014-10-07 14:00:00	2016-08-08 02:45:00	2005-12-15 19:45:00	1900-09-26	wwwsw	0.354171
3003	2014-08-29 15:30:00	2015-08-10 17:30:00	2012-08-21 20:30:00	2013-07-29 19:30:00	2001-01-24 14:15:00	1900-08-10	ssssw	92	2015-08-10 17:45:00	1978-10-05 11:30:00	1990-03-10 13:15:00	2013-07-29 19:30:00	2014-08-29 15:30:00	1900-09-11	swwss	0.221842	ok
3004	2006-07-11 09:15:00	2013-04-16 20:45:00	2011-07-16 15:15:00	2019-07-31 10:45:00	2001-05-29 03:00:00	1900-08-02	swsss	90	2014-08-06 18:00:00	2019-07-31 10:45:00	2006-07-11 09:15:00	2001-05-29 03:00:00	2010-12-30 11:45:00	1900-08-02	ssssw	0.275786	x	0.234
3006	2014-08-11 06:15:00	2013-09-03 10:00:00	2008-03-21 14:30:00	2021-11-18 04:45:00	2016-12-23 20:15:00	1900-08-22 12:00:00	sswww	122	2014-08-11 06:15:00	2013-09-03 10:00:00	2018-10-23 03:00:00	2012-01-12 01:00:00	2021-11-18 04:45:00	1900-09-15	sswww	0.167785
4001	1979-02-26 15:30:00	2010-11-03 12:45:00	1982-10-01 09:00:00	1987-01-13 17:00:00	2016-01-29 09:30:00	1900-06-18	wwwww	130	1979-02-26 15:30:00	1980-12-14 18:30:00	1981-10-28 17:30:00	1979-10-22 07:45:00	1982-10-01 09:00:00	1900-05-04	wwwww	0.43971
4003	1975-07-15	1977-08-25 08:15:00	1974-07-12 21:30:00	2019-07-10 14:30:00	1980-06-06 19:45:00	1900-08-06	sssss	64	1975-07-15	2019-07-10 14:30:00	1977-08-25 08:15:00	2012-08-06 23:15:00	2006-10-26 08:15:00	1900-08-17 12:00:00	ssssw	0.300563	ok
4005	2007-07-03 14:15:00	2019-07-30 21:30:00	2004-08-16 18:15:00	1988-07-07 15:45:00	1992-01-06 08:15:00	1900-07-30	ssssw	87	2004-12-21 21:15:00	2004-02-02 17:15:00	2003-03-09 11:00:00	2019-07-30 21:30:00	2007-07-03 14:15:00	1900-07-30	wwwss	0.438453
4006	2010-01-16 06:30:00	1990-12-11 06:00:00	2010-12-29 22:45:00	2001-01-24 14:15:00	1996-01-04 08:30:00	1900-09-11	wwwww	120	2010-01-16 06:30:00	2013-12-14 15:45:00	2013-01-02 19:00:00	2014-10-21 06:00:00	2010-12-29 22:45:00	1900-05-05	wwwww	0.934759
4007	2002-08-06 22:00:00	2020-01-11 03:30:00	2018-10-23 07:00:00	2005-12-15 21:00:00	2017-08-25 18:15:00	1900-09-15	swwws	111	2020-01-11 03:45:00	2010-12-10 12:30:00	2018-01-28 22:45:00	2005-12-15 21:00:00	2017-08-25 18:30:00	1900-07-28	wwwws	0.370687
4008	2015-08-10 19:30:00	2011-06-13 11:00:00	2006-10-24 05:15:00	1998-05-14 18:30:00	2000-08-27 23:45:00	1900-08-10	sswss	90	2006-10-24 05:15:00	2011-12-08 15:00:00	2015-01-15 13:00:00	1997-05-19 04:00:00	2017-11-21 21:15:00	1900-08-20	wwwsw	1.1782
4009	1997-07-01 08:00:00	2000-08-18 21:30:00	1995-11-26 23:30:00	2010-12-10 13:45:00	1998-06-25 13:30:00	1900-07-11	sswws	56	2013-12-28 09:00:00	2014-10-28 05:15:00	2000-08-18 21:30:00	2004-08-18 17:45:00	2002-02-21 20:00:00	1900-08-19	wwssw	0.185874
4010	2016-02-01 05:00:00	2019-07-30 20:30:00	2020-01-07 14:30:00	2016-12-23 12:15:00	2014-12-09 12:45:00	1900-10-24 12:00:00	wswww	134	2020-01-07 14:30:00	2016-01-29 05:45:00	2013-12-05 05:30:00	2019-07-30 20:45:00	2015-01-09 23:45:00	1900-08-06 12:00:00	wwwsw	0.0929364
4011	2016-06-07 14:30:00	2012-07-22 16:30:00	2019-07-30 19:30:00	2015-06-25 17:15:00	2013-09-15 07:30:00	1900-08-12 12:00:00	sssss	83	2016-06-07 14:30:00	2019-07-30 19:30:00	2012-07-22 16:30:00	2016-10-18 00:45:00	2011-09-25 17:45:00	1900-07-26 12:00:00	sssws	0.49575
5003	1989-04-13 01:45:00	1990-02-14 13:45:00	1990-11-12 17:30:00	1991-10-28 17:30:00	1993-04-23 04:45:00	1900-06-18	wwwww	103	1990-02-14 13:45:00	1993-04-23 04:45:00	2009-02-13 09:45:00	2009-12-06 17:00:00	2018-08-27 17:15:00	1900-04-27 12:00:00	wwwws	0.255278
5004	2021-07-05 20:00:00	2008-12-03 22:00:00	2017-08-26 01:45:00	2013-04-14 04:15:00	2005-09-26 14:45:00	1900-08-19 12:00:00	swsws	82	2008-10-25 10:15:00	1997-03-01 09:00:00	2015-11-08 16:00:00	1995-09-23 19:30:00	2021-07-05 20:00:00	1900-09-03	wwwss	0.317179
6007	2013-02-04 13:45:00	1977-11-08 19:45:00	2020-10-24 07:30:00	2002-03-10 22:00:00	2020-02-09 15:15:00	1900-10-06	wwwww	130	2016-05-05 12:30:00	1976-01-27 07:00:00	1995-10-25 01:30:00	1977-11-08 19:45:00	1972-12-04 21:45:00	1900-08-31	swwww	0.0980371
6008	1981-11-20 06:45:00	1992-01-06 11:15:00	2015-12-04 19:15:00	1990-12-28 12:00:00	1999-01-15 11:45:00	1900-08-19	wwwww	126	1980-07-27 09:00:00	2015-03-07 05:30:00	2006-12-01 01:15:00	1990-02-05 02:15:00	1994-03-05 01:00:00	1900-10-01	swwww	0.058781
6011	2018-06-02 18:30:00	2012-06-28 18:30:00	2004-05-09 19:30:00	2006-09-01 08:00:00	2016-08-07 17:30:00	1900-08-10 12:00:00	sssss	84	2012-06-28 18:45:00	2016-08-07 17:30:00	2000-08-02 18:30:00	2018-06-02 18:30:00	2004-08-17 20:00:00	1900-08-05 12:00:00	sssss	0.773482
6012	2009-07-06 18:45:00	2016-07-20 05:00:00	2011-06-07 20:45:00	2012-02-04 15:30:00	2021-02-15 04:30:00	1900-07-08 12:00:00	sssww	90	2016-07-20 05:00:00	2009-02-15 03:45:00	2011-01-13 09:15:00	2010-01-16 12:00:00	2014-02-26 14:45:00	1900-05-09 12:00:00	swwww	0.253257
6013	2013-06-22 13:45:00	2020-06-26 15:30:00	2019-08-07 01:15:00	2021-07-04 15:30:00	2004-06-20 14:00:00	1900-07-21	sssss	64	2002-09-08 03:00:00	2019-08-07 01:15:00	1998-11-14 15:30:00	2009-07-02 15:30:00	2016-05-21 12:00:00	1900-07-13	sswss	1.55172
7001	1994-08-04 02:15:00	2019-08-01 02:15:00	1986-08-14 07:15:00	2016-07-20 07:45:00	2005-08-31 22:30:00	1900-09-17	sssss	86	2014-08-11 07:45:00	2014-11-14 18:15:00	2005-08-31 22:30:00	1980-07-26 04:30:00	2019-08-01 02:15:00	1900-09-09 12:00:00	swsss	0.705535
7002	1990-06-07 03:30:00	1980-07-26 09:00:00	2011-07-07 03:15:00	2005-09-01 03:15:00	2006-07-03 10:00:00	1900-09-21	sssss	89	1990-06-07 03:30:00	2014-08-17 21:30:00	1980-07-26 09:00:00	2016-01-26 16:30:00	1958-09-07 02:00:00	1900-09-18	sssws	0.610153
7003	2004-08-19 11:30:00	2009-07-24 14:45:00	2015-09-02 01:15:00	2002-07-30 18:45:00	2014-08-11 03:30:00	1900-08-26	sssss	68	2004-08-19 11:30:00	2014-08-11 07:00:00	2004-10-17 16:45:00	2009-11-01 23:15:00	1997-07-01 10:30:00	1900-09-02	sswws	0.19945
7004	2006-08-01 21:45:00	2000-08-28 03:45:00	2011-07-16 16:45:00	1990-06-07 01:30:00	1981-09-20 08:15:00	1900-08-12	sssss	78	2006-08-01 21:45:00	1981-09-20 13:15:00	1981-10-03 03:30:00	1990-06-07 01:30:00	1990-10-28 19:30:00	1900-08-12 12:00:00	sswsw	0.246489
7005	1985-07-27 17:15:00	1999-06-28 16:45:00	1986-03-04 15:15:00	1983-05-07 19:00:00	1989-09-23 06:15:00	1900-08-11 12:00:00	sswss	84	2004-08-19 03:00:00	1985-12-01 08:00:00	2014-08-11 04:45:00	1984-09-23 18:30:00	1985-07-27 17:15:00	1900-09-03	swsss	0.198618
7008	2008-08-03 21:45:00	2006-08-01 16:30:00	2009-07-06 23:15:00	2007-08-18 18:30:00	2004-12-14 20:15:00	1900-08-07	ssssw	76	2006-08-01 16:30:00	2008-08-03 21:45:00	2009-07-06 23:15:00	2007-08-18 18:30:00	1997-08-13 20:00:00	1900-08-10	sssss	0.197047
7009	2019-08-07 02:15:00	2004-10-17 13:30:00	1999-06-28 18:30:00	2008-08-21 14:15:00	1999-11-28 19:45:00	1900-08-20 12:00:00	swssw	73	2004-10-17 13:30:00	2014-08-11 05:30:00	2002-11-16 13:00:00	2009-09-04 06:00:00	2020-12-08 04:15:00	1900-08-10 12:00:00	wswsw	0.624633
7010	2011-07-16 20:45:00	2021-07-27 19:15:00	2009-07-14 22:45:00	2020-06-06 04:30:00	2014-08-17 20:15:00	1900-07-21 12:00:00	sssss	72	2011-07-16 20:45:00	2005-06-13 07:00:00	2021-07-27 19:15:00	2014-08-11 05:45:00	2014-10-08 04:15:00	1900-07-15	ssssw	0.19116
7011	2020-12-31 08:15:00	2016-01-10 05:15:00	2013-06-23 19:30:00	2012-08-25 06:30:00	2014-08-11 02:15:00	1900-08-11	wwsss	109	2014-08-11 08:15:00	2017-06-07 01:30:00	2020-12-08 02:30:00	2016-01-10 05:15:00	2014-10-07 20:00:00	1900-08-26	sswww	0.397674
7012	2015-09-01 21:15:00	2019-04-03 11:00:00	2017-06-07 00:15:00	2020-12-08 02:15:00	2021-11-01 06:30:00	1900-08-18	swsww	99	2017-06-07 03:00:00	2020-12-08 03:45:00	2019-04-03 11:00:00	2015-09-01 22:45:00	2016-08-03 15:45:00	1900-10-11 12:00:00	swwss	0.555018
8002	2021-10-31 17:15:00	1987-09-24 21:45:00	1988-08-12 20:45:00	1989-09-20 08:00:00	1989-12-24 15:45:00	1900-09-27 12:00:00	wsssw	56	2019-12-23 03:45:00	2012-08-05 23:45:00	2019-07-24 10:00:00	1999-09-08 21:15:00	2015-07-17 09:45:00	1900-10-03	wssss	0.0992034
8004	2011-07-09 19:15:00	2004-08-04 08:00:00	1980-06-06 19:15:00	1989-01-13 21:30:00	1993-10-01 10:30:00	1900-09-12 12:00:00	sssww	91	1980-06-06 19:15:00	1990-10-28 19:45:00	2015-07-17 10:30:00	2000-10-28 22:45:00	1989-01-13 21:30:00	1900-09-19 12:00:00	swsww	0.684002
8005	2019-12-10 16:45:00	2011-08-10 16:30:00	2004-10-21 13:45:00	2005-10-30 20:45:00	2016-12-23 19:30:00	1900-10-22	wswww	102	2003-11-29 17:45:00	2019-12-10 16:45:00	2019-07-24 14:15:00	1990-02-05 10:15:00	2001-10-31 04:15:00	1900-09-18	wwsww	0.111762
8006	2006-09-15 03:15:00	1982-08-07 03:15:00	1978-08-05 00:45:00	1980-06-06 22:15:00	1992-08-30 18:00:00	1900-08-31 12:00:00	sssss	83	1982-08-07 03:15:00	1980-06-06 22:15:00	1982-10-04 23:30:00	1975-11-16 09:45:00	1958-07-28 23:15:00	1900-09-07	sswws	0.30153
8007	2000-08-02 20:00:00	2001-01-22 20:30:00	2004-10-19 16:30:00	1991-09-21 17:00:00	2001-10-01 01:45:00	1900-09-21	swwsw	106	2021-11-09 13:15:00	1998-10-16 15:45:00	2009-07-02 19:30:00	2001-10-01 01:45:00	2011-10-29 18:15:00	1900-08-21 12:00:00	wwsww	0.14321
8008	2005-01-01 14:15:00	2009-08-20 10:00:00	2018-09-18 00:30:00	2007-06-22 17:15:00	2015-06-01 21:15:00	1900-09-07 12:00:00	wssss	97	1993-01-17 09:00:00	2002-07-30 18:45:00	2009-08-20 10:00:00	2005-11-07 23:00:00	2005-01-01 14:15:00	1900-08-24	wssww	0.880152
8009	1981-09-18 10:15:00	2016-06-07 19:00:00	1990-06-07 01:30:00	2005-09-01 00:15:00	1998-08-10 22:00:00	1900-08-30	sssss	103	1981-09-20 10:30:00	1958-08-11 02:45:00	1985-12-01 07:15:00	1990-06-07 01:30:00	1963-03-05 22:15:00	1900-08-10 12:00:00	sswsw	0.291495
8010	1989-01-13 22:00:00	1992-10-01 08:00:00	2012-10-12 16:15:00	2002-11-15 12:30:00	1988-08-13 01:00:00	1900-09-03	wwwws	76	1990-06-07 03:30:00	1989-01-13 22:00:00	1993-01-16 21:15:00	2015-12-05 05:45:00	2007-06-21 18:45:00	1900-09-01	swwws	0.0650851
8011	2016-06-24 16:45:00	2001-06-27 19:30:00	2002-08-06 13:45:00	2005-06-03 20:45:00	1999-07-10 15:45:00	1900-08-08	sssss	46	2002-08-06 13:45:00	2004-08-19 02:00:00	2014-08-11 06:00:00	2001-06-27 19:30:00	1999-07-10 15:45:00	1900-08-11 12:00:00	sssss	0.669867
8013	2015-07-17 08:30:00	2005-08-24 07:15:00	2015-10-24 09:00:00	2020-07-27 17:45:00	2012-08-05 22:30:00	1900-08-26	sswss	51	2015-12-30 12:15:00	2016-12-23 19:30:00	2019-07-24 08:45:00	2015-07-17 08:30:00	2002-07-30 20:30:00	1900-08-29 12:00:00	wwsss	0.690364
9001	2009-07-06 23:00:00	1977-08-26 14:30:00	2013-10-10 01:30:00	1992-08-30 17:00:00	2007-06-24 00:30:00	1900-08-26	sswss	78	1962-01-05 20:15:00	1970-08-16 14:00:00	2009-07-06 23:00:00	1972-05-27 16:15:00	1977-08-26 14:30:00	1900-08-26	wssss	0.292352
9002	2009-07-07 04:00:00	1984-09-24 00:30:00	1977-08-26 19:15:00	1967-10-04 13:45:00	1972-05-27 23:30:00	1900-08-21	sssws	72	2009-11-01 21:45:00	1960-08-25 21:45:00	1972-05-27 23:30:00	1970-08-16 18:30:00	1960-11-04 07:30:00	1900-08-26	wsssw	0.247164
9003	1996-01-01 09:00:00	2021-07-11 18:45:00	1991-11-04 04:45:00	2002-07-30 23:30:00	2004-08-18 16:15:00	1900-08-15	wswss	96	2009-11-01 22:30:00	2021-07-11 19:00:00	2017-10-22 08:30:00	2014-08-11 00:45:00	2005-11-25 11:15:00	1900-08-26 12:00:00	wswsw	0.242193
9004	2002-07-30 22:15:00	2010-09-23 04:30:00	2016-07-20 20:00:00	2000-04-23 15:15:00	1993-09-11 14:30:00	1900-08-14	sssws	81	2002-07-30 22:15:00	2016-07-20 20:00:00	1998-04-04 09:00:00	2002-11-15 12:45:00	2007-11-22 12:00:00	1900-09-07	sswww	0.115545
9005	2009-07-06 19:00:00	2010-04-01 09:15:00	2015-07-17 10:00:00	2013-11-02 19:30:00	2004-08-18 13:15:00	1900-08-07	swsws	89	2009-07-06 19:00:00	2004-08-18 13:15:00	2021-08-10 19:45:00	1995-09-07 23:00:00	2001-08-19 22:45:00	1900-09-07	sssss	0.417485
9006	2021-05-10 17:45:00	2010-09-23 05:00:00	2002-07-19 10:15:00	2020-07-27 20:00:00	2014-08-10 23:15:00	1900-08-19 12:00:00	sssss	87	2010-09-23 09:00:00	1995-09-12 09:00:00	2014-08-10 23:45:00	2009-09-04 00:30:00	2014-10-08 03:30:00	1900-09-08	ssssw	0.758603
9010	2009-07-06 21:30:00	2012-10-12 15:30:00	2015-07-17 14:15:00	2021-05-19 00:45:00	2013-10-09 23:30:00	1900-07-19	swssw	71	2009-07-06 21:45:00	2012-10-12 15:30:00	2015-12-30 12:15:00	2009-11-02 00:45:00	2021-08-07 07:30:00	1900-08-07	swwws	0.207733
10002	2014-01-19 18:00:00	1998-11-26 15:15:00	1995-09-12 05:30:00	2016-01-08 07:00:00	2009-11-02 05:15:00	1900-08-11	wwsww	118	2016-01-08 07:00:00	1991-10-20 09:00:00	2010-12-11 06:15:00	1996-09-26 09:00:00	2009-11-02 05:15:00	1900-09-19 12:00:00	wwwsw	0.80927
10003	2020-10-22 02:45:00	2017-08-18 18:00:00	1999-12-25 00:30:00	1985-08-30 09:45:00	1987-10-21 08:15:00	1900-10-21	wswsw	96	2016-01-08 00:30:00	1996-02-10 09:00:00	2020-10-22 06:15:00	2009-11-01 20:15:00	2008-04-08 15:45:00	1900-10-07 12:00:00	wwwww	0.198058
11001	2003-12-24 20:00:00	2007-06-24 07:15:00	2001-10-21 02:15:00	2012-10-12 19:15:00	2016-01-08 00:30:00	1900-08-09	wswww	75	2016-01-08 04:00:00	2012-09-25 19:45:00	2009-10-22 18:15:00	2003-12-24 20:00:00	2002-10-23 07:00:00	1900-08-12	wswww	0.0788994
11002	1973-12-03 09:45:00	1982-08-07 10:45:00	1999-07-11 00:30:00	1986-03-04 22:00:00	1979-01-15 00:15:00	1900-08-06 12:00:00	wssww	97	1973-12-03 09:45:00	1981-12-31 01:30:00	1979-01-15 00:15:00	1999-07-11 00:30:00	1984-09-24 01:30:00	1900-08-19 12:00:00	wwwwss	0.348451
11003	1982-08-07 06:15:00	1999-07-10 19:15:00	1995-12-30 19:15:00	1985-01-27 18:15:00	1984-09-23 21:45:00	1900-08-06 12:00:00	sswws	80	1995-12-30 19:15:00	1982-08-07 06:15:00	1999-07-10 19:15:00	2004-08-19 03:30:00	1985-01-27 18:15:00	1900-09-04	wsssw	0.317388
11004	1990-11-18 03:00:00	2002-09-07 17:30:00	2013-11-03 06:45:00	2020-10-22 06:30:00	2010-11-19 06:15:00	1900-09-09	wswww	90	1995-09-08 09:00:00	2009-11-02 00:15:00	2016-01-08 00:30:00	1990-11-18 03:00:00	2015-07-07 16:45:00	1900-09-04	swwws	0.204795
11006	2007-06-21 19:00:00	2011-06-21 04:45:00	2004-01-01 09:00:00	1999-07-10 14:45:00	2019-07-10 19:45:00	1900-07-22 12:00:00	sswss	84	2009-11-02 01:15:00	2021-02-21 00:30:00	1999-07-10 14:45:00	2007-06-22 19:00:00	2001-08-19 21:30:00	1900-08-04	wwsss	0.254403
12001	2007-10-28 12:30:00	1989-09-20 17:45:00	2019-07-24 20:00:00	1993-10-01 13:00:00	1990-01-10 18:45:00	1900-09-18	wssww	88	2015-12-30 14:30:00	1981-10-03 01:30:00	1989-09-20 17:45:00	2002-07-31 03:45:00	1990-01-10 18:45:00	1900-09-24	swwssw	0.387084
12002	1982-08-07 04:00:00	1993-10-01 15:30:00	1990-01-10 20:15:00	1989-09-20 19:30:00	2000-01-31 04:00:00	1900-09-10 12:00:00	swwsw	99	1982-09-25 02:30:00	1993-10-01 15:30:00	2002-07-31 05:30:00	2014-10-06 17:45:00	1992-02-27 20:45:00	1900-09-22 12:00:00	swsww	0.166891
12003	1991-09-21 23:00:00	1990-09-07 00:15:00	1999-09-09 01:00:00	2020-07-27 21:15:00	2019-07-24 13:45:00	1900-08-25 12:00:00	sssss	90	1982-08-06 20:15:00	2021-02-20 20:00:00	2018-12-18 12:45:00	1990-09-07 00:15:00	2014-10-06 12:15:00	1900-09-08	swwsw	0.349633
12004	2000-07-29 16:00:00	2020-08-12 06:00:00	2004-08-04 04:30:00	1996-07-23 16:30:00	1999-05-12 14:00:00	1900-08-04	sssss	101	1995-09-09 22:15:00	1993-01-15 05:15:00	1998-06-07 14:00:00	1996-01-08 23:15:00	2002-07-31 00:30:00	1900-07-17	swsws	1.90531
12005	2001-07-03 21:15:00	2018-06-02 16:15:00	2007-06-08 00:30:00	2020-08-12 06:45:00	2021-08-06 10:30:00	1900-08-08	sssss	66	1999-09-20 23:15:00	2004-08-18 09:00:00	2007-06-08 00:30:00	2018-06-02 16:15:00	2001-07-03 21:15:00	1900-08-06	sssss	0.464345
12006	2006-02-03 13:15:00	2001-10-14 21:00:00	2000-08-08 16:15:00	1991-06-30 18:15:00	1993-01-01 12:15:00	1900-07-24	wwssw	120	2001-10-14 21:00:00	2021-02-24 15:15:00	1993-01-15 09:00:00	1990-10-28 21:30:00	2015-07-17 09:00:00	1900-07-11	wwwws	0.526072
12007	2019-07-24 09:00:00	1999-09-08 19:30:00	1984-09-23 14:30:00	1991-09-21 17:00:00	1990-09-06 19:00:00	1900-09-01	sssss	99	2019-07-24 09:00:00	2015-07-17 07:30:00	1999-09-08 19:30:00	1988-10-07 13:45:00	2020-06-17 02:30:00	1900-09-10	sssws	0.255747
12008	2000-07-30 16:45:00	2015-07-17 08:15:00	2003-04-22 05:00:00	1988-10-19 08:30:00	2011-10-25 12:15:00	1900-08-25 12:00:00	sswww	66	1987-07-11 17:30:00	2015-12-30 11:45:00	2015-07-07 18:15:00	1988-10-19 08:30:00	2012-08-16	1900-10-02 12:00:00	swsws	0.215344
12009	1991-06-23 16:15:00	2004-08-18 07:15:00	2015-07-07 16:00:00	2012-08-27 15:15:00	2011-07-10 11:30:00	1900-09-11	sssss	58	2000-07-30 15:00:00	2015-07-07 16:45:00	2006-10-19 15:30:00	1991-06-23 16:15:00	1995-09-07 20:15:00	1900-10-04	sswss	0.477766
13001	1987-07-11 17:00:00	1991-06-23 20:00:00	2005-05-03 16:00:00	2019-08-09 16:45:00	2021-05-12 09:15:00	1900-09-15 12:00:00	sssss	106	2012-12-23 04:00:00	2010-11-19 10:15:00	1979-10-04 15:30:00	2009-11-01 23:30:00	2020-10-04 03:30:00	1900-09-05 12:00:00	wwwww	0.503693
13002	2019-07-10 18:15:00	1993-07-17 14:30:00	1987-10-18 13:00:00	1987-07-11 19:00:00	2017-07-26 17:15:00	1900-08-28	sswss	94	1985-12-01 05:15:00	2019-07-10 18:15:00	1988-04-18 23:30:00	1984-11-10 03:30:00	1988-10-26 04:30:00	1900-08-04 12:00:00	wswww	0.221774
13004	2021-09-10 18:00:00	1998-06-26 20:15:00	2000-06-22 18:30:00	2010-09-07 16:00:00	2007-10-28 05:45:00	1900-08-23	ssssw	57	2015-07-17 06:30:00	2021-09-10 18:00:00	2005-06-04 14:00:00	2005-10-30 15:00:00	2004-08-19 12:15:00	1900-09-09	sssws	0.462574
13005	2002-10-22 08:45:00	1998-10-16 14:15:00	2019-08-09 16:30:00	1994-01-03 20:45:00	2012-11-22 14:15:00	1900-09-18 12:00:00	wwsww	110	2002-10-22 08:45:00	2020-10-22 04:30:00	2001-02-28 16:00:00	2004-10-21 11:00:00	2019-08-09 17:00:00	1900-06-13	wwwws	0.173134
13007	1992-08-22 23:45:00	1997-11-18 08:45:00	2021-08-06 12:00:00	2010-09-07 18:30:00	2012-08-27 16:15:00	1900-09-07	swsss	95	2015-07-17 09:15:00	1997-11-18 08:45:00	2018-11-10 04:45:00	2010-10-01 17:00:00	2000-09-20 03:30:00	1900-09-20	swwws	0.236559
13008	2020-08-12 10:30:00	2015-07-17 10:00:00	2017-09-28 07:30:00	2011-10-25 13:45:00	2009-04-08 09:15:00	1900-09-16	sssww	68	2015-07-17 10:00:00	2020-08-12 10:30:00	2012-08-27 16:45:00	1988-10-19 10:00:00	2017-09-28 07:30:00	1900-09-21	sssws	0.277
13009	1992-08-22 21:45:00	2009-07-06 14:00:00	1994-10-20 10:15:00	2021-08-06 09:45:00	1990-06-06 22:15:00	1900-08-30	sswss	62	2015-07-17 07:30:00	1985-08-14 21:00:00	2009-07-06 14:00:00	2012-08-27 14:30:00	1992-08-22 21:45:00	1900-09-10	sssss	0.604946
13010	2007-03-07 05:30:00	2020-08-12 06:30:00	2011-08-06 23:30:00	2019-08-09 15:45:00	2005-01-08 08:00:00	1900-08-15 12:00:00	wsssw	84	2019-08-09 16:15:00	2005-01-08 08:00:00	2011-08-06 23:45:00	2007-03-07 05:30:00	2020-10-22 04:30:00	1900-08-16 12:00:00	swsww	0.184187
13012	1999-12-22 12:15:00	2015-12-30 08:15:00	2002-11-03 01:45:00	1997-11-18 14:15:00	2018-11-28 23:00:00	1900-08-31 12:00:00	wwwww	73	2015-12-30 13:15:00	2018-11-28 23:00:00	2015-07-17 15:00:00	2002-11-03 01:45:00	1997-11-18 14:15:00	1900-09-08	wwsww	0.229916
13017	2011-07-06 10:30:00	2019-08-09 14:30:00	2007-01-11 02:45:00	2005-01-08 07:00:00	2020-08-12 05:45:00	1900-09-02	sswws	94	2011-07-06 10:30:00	2020-10-03 19:00:00	2009-09-03 19:45:00	2009-11-01 16:15:00	2007-01-11 02:45:00	1900-08-09	swsww	1.60882
14001	2002-07-31 01:30:00	2008-08-10 02:30:00	2000-10-09 18:00:00	1999-12-24 21:45:00	1995-11-15 10:30:00	1900-07-17 12:00:00	sswww	93	2009-07-06 11:30:00	2008-08-10 02:30:00	2002-07-31 01:30:00	2013-05-20 16:30:00	2009-11-01 15:30:00	1900-07-12 12:00:00	ssssw	0.1305
14002	2021-07-28 00:15:00	1991-11-18 20:30:00	2002-07-30 23:15:00	2004-08-16 17:00:00	2008-08-13	1900-08-15 12:00:00	swsss	77	2021-07-28 00:15:00	2004-08-16 17:00:00	2019-08-10 22:45:00	2009-09-04 08:30:00	2002-07-30 23:15:00	1900-08-17	sssss	0.210641
14005	1993-10-07 12:30:00	1998-04-03 11:45:00	1992-03-31 16:15:00	2009-11-01 17:45:00	2002-12-01 11:15:00	1900-10-11 12:00:00	wwwww	122	1993-10-07 12:30:00	1993-01-15 17:00:00	1992-04-01 04:15:00	2008-08-13 19:00:00	2012-12-21 04:15:00	1900-10-06	wwwsw	0.1104
14009	2009-07-06 10:30:00	2016-08-03 07:00:00	2005-06-04 16:00:00	2005-10-24 13:00:00	2001-10-08 00:30:00	1900-08-17	sssww	103	2000-04-26 21:15:00	2005-10-24 13:00:00	1999-09-23 05:00:00	1993-01-15 09:45:00	2005-06-04 16:00:00	1900-08-26 12:00:00	wwsws	0.264368
15003	2002-07-30 04:30:00	2010-09-29 16:15:00	2009-08-20 14:15:00	2005-11-11 12:00:00	1997-11-18 06:30:00	1900-09-21 12:00:00	sssww	92	2005-11-11 12:00:00	1993-01-17 06:15:00	1997-02-17 23:30:00	2003-11-29 18:30:00	2002-07-30 04:30:00	1900-09-25 12:00:00	wwwws	0.0770046
15006	1962-09-30 10:30:00	2014-10-06 16:30:00	1952-11-07 00:45:00	1981-09-18 12:30:00	2000-09-20 08:45:00	1900-10-05	swwss	97	1993-01-17 13:30:00	2003-11-29 19:15:00	1990-01-10 15:15:00	2005-11-11 14:30:00	2006-12-13 18:45:00	1900-10-03	wwwww	0.0607447
15007	2009-08-20 11:15:00	1997-11-18 03:15:00	1991-12-22 10:45:00	2004-10-21 11:00:00	2005-11-11 08:30:00	1900-08-23	swwww	102	2004-08-11 10:30:00	1993-01-16 23:00:00	2002-07-30 19:00:00	2015-07-17 07:30:00	2004-10-21 11:00:00	1900-09-20 12:00:00	swssw	0.0739561
15010	2021-08-06 13:15:00	2007-10-28 07:00:00	2014-10-06 13:00:00	2009-06-17 14:45:00	2013-12-05 11:30:00	1900-09-21 12:00:00	swwsw	57	2020-08-12 06:15:00	2021-08-06 13:15:00	2021-10-31 16:30:00	2015-07-17 08:00:00	2007-10-28 07:00:00	1900-09-23 12:00:00	sswsw	0.20928
15011	2007-06-22 16:15:00	2015-11-08 15:00:00	2009-07-03 20:15:00	1994-08-23 10:15:00	2012-08-17 09:45:00	1900-07-23 12:00:00	swsss	84	2002-07-30 17:00:00	1997-02-19 16:45:00	2007-06-22 16:15:00	2004-08-09 11:45:00	2010-10-29 20:00:00	1900-08-23	swssw	0.251436
15012	2020-11-05 19:45:00	2000-02-27 06:45:00	2001-02-11 14:30:00	2015-12-30 04:00:00	1997-02-17 19:45:00	1900-10-16	wwwww	116	2006-11-20 01:00:00	1995-10-26 08:00:00	2001-10-15 19:00:00	2000-01-30 21:45:00	2008-03-08 13:30:00	1900-10-25	wwwww	0.440106
15013	2006-09-01 12:30:00	2015-06-01 22:30:00	2021-03-10 01:15:00	1994-10-20 08:00:00	1993-10-01 12:15:00	1900-09-13	sswww	92	1993-10-01 12:15:00	2015-06-01 22:30:00	2006-11-19 22:30:00	2020-02-08 22:00:00	1993-01-15 09:30:00	1900-09-28	wswww	0.590949
15014	2006-08-19 15:45:00	2009-06-13 22:00:00	2014-08-09 00:30:00	2017-06-21 21:45:00	2015-08-10 16:00:00	1900-08-13	sssss	71	2005-06-19 05:45:00	2015-08-10 16:15:00	2016-07-20 10:30:00	2012-08-15 22:00:00	2019-07-24 07:00:00	1900-09-03 12:00:00	sssss	0.491001
15015	2002-10-22 01:00:00	2006-09-01 08:00:00	2018-06-02 19:30:00	2016-07-20 10:45:00	2014-10-06 08:00:00	1900-09-01 12:00:00	wsssw	81	2001-12-03 23:15:00	2006-09-01 08:15:00	2006-11-19 21:00:00	2005-06-19 06:00:00	1999-09-20 18:00:00	1900-09-15 12:00:00	wswss	0.475579
15016	2011-12-08 14:15:00	1993-01-15 19:00:00	1998-11-10 03:15:00	2015-11-11 17:30:00	1994-01-27 11:45:00	1900-07-21	wwwww	136	1993-01-15 19:00:00	2018-09-19 10:45:00	2008-01-08 20:45:00	2011-12-08 14:15:00	2015-12-30 08:45:00	1900-04-15	wswww	0.0490529
15021	2013-12-31 10:45:00	2000-09-20 14:00:00	2011-01-15 13:30:00	2014-11-07 11:45:00	2018-12-18 21:00:00	1900-09-04	wswww	118	2016-01-07 19:30:00	2013-12-31 10:45:00	2004-08-12 02:00:00	1999-02-05 11:00:00	2012-12-23 03:45:00	1900-04-23	wwsww	0.254777
15023	2020-08-11 18:45:00	1996-01-01 19:45:00	2002-08-06 21:30:00	2007-07-01 19:00:00	2010-12-10 15:30:00	1900-09-01	swssw	89	2004-08-11 08:15:00	1996-01-01 19:45:00	2010-12-10 15:30:00	1997-02-19 15:15:00	2001-10-20 16:45:00	1900-08-05 12:00:00	swsws	0.65212
15024	1994-08-03 21:30:00	1997-11-16 16:00:00	1992-02-12 13:45:00	2002-07-30 15:30:00	2011-09-21 12:15:00	1900-08-07 12:00:00	swwss	73	2007-07-14 01:30:00	2004-08-18 17:15:00	1992-02-12 13:45:00	2002-07-30 15:30:00	1997-05-18 16:00:00	1900-09-04	sswss	0.0834043
15025	2007-10-28 06:45:00	2005-06-19 09:30:00	2020-07-27 18:30:00	1995-10-03 03:00:00	2018-06-16 22:30:00	1900-08-19	wssws	79	2014-10-06 12:15:00	1995-10-03 03:00:00	2004-12-23 08:30:00	2007-11-28 20:00:00	2004-05-09 20:45:00	1900-09-05 12:00:00	wwwws	0.324367
15028	2013-05-03 17:45:00	2021-05-12 19:00:00	2015-07-17 05:45:00	2020-02-08 22:00:00	2008-12-12 21:30:00	1900-07-24	sssww	122	2004-08-11 11:15:00	1993-01-15 10:30:00	2005-01-08 09:30:00	2002-02-01 13:15:00	1999-12-25 01:30:00	1900-07-25 12:00:00	swwww	0.157942
15030	1992-08-31 10:45:00	2020-10-04	2002-07-31 04:30:00	2001-01-22 18:15:00	2006-10-26 07:30:00	1900-08-29 12:00:00	swsww	119	2016-01-07 15:45:00	2020-10-04	1992-08-31 10:45:00	1994-01-03 21:45:00	1993-01-15 12:00:00	1900-06-23	wwsww	0.252567
15034	2009-07-02 19:30:00	2014-07-06 22:30:00	2005-09-01 00:15:00	2019-07-24 07:30:00	2018-09-16 06:00:00	1900-09-05	sssss	69	2002-07-30 20:00:00	2018-09-16 06:00:00	2010-10-29 21:15:00	2011-10-29 18:00:00	2015-12-22 09:15:00	1900-09-21	sswww	0.338862
15039	2014-07-06 21:00:00	2018-06-03 15:30:00	2002-08-06 20:00:00	2021-08-06 12:00:00	2005-06-19 06:00:00	1900-08-06	sssss	63	2019-07-24 07:15:00	2014-07-06 21:00:00	2015-08-10 17:00:00	2004-08-06 03:00:00	2005-06-19 06:00:00	1900-08-28 12:00:00	sssss	0.767891
15046	2019-07-11 21:30:00	2011-07-16 16:15:00	2012-08-21 18:15:00	2015-07-17 04:30:00	2010-07-14 23:45:00	1900-07-17	sssss	88	2015-12-04 23:30:00	2019-07-11 21:30:00	2011-01-15 13:45:00	2013-01-29 00:30:00	2020-02-15 18:30:00	1900-07-14	wswww	0.241325
16001	2004-09-13 03:30:00	2012-08-04 22:00:00	2020-09-30 15:45:00	2019-02-08 11:15:00	2015-07-17 06:45:00	1900-08-04	sssws	77	1991-01-01 19:45:00	2005-06-19 09:30:00	2004-09-13 03:30:00	1992-05-12 01:30:00	2012-08-04 22:00:00	1900-08-05	wssss	0.126351
16003	2001-07-04 01:15:00	2012-08-04 18:15:00	1992-08-03 02:45:00	1994-08-23 07:45:00	2014-08-02 20:30:00	1900-08-03	sssss	91	2012-08-04 18:30:00	2001-07-04 01:15:00	2015-11-08 15:00:00	2002-02-01 09:15:00	2015-07-17 03:15:00	1900-08-23	sswws	0.640507
16004	1998-10-21 00:15:00	2015-07-17 08:45:00	2008-12-13 01:45:00	1993-03-29 22:15:00	2002-10-12 05:45:00	1900-08-20	wswww	86	2020-08-12 02:15:00	1999-11-28 11:30:00	1998-10-21 00:15:00	2000-10-29 13:00:00	2006-12-13 19:30:00	1900-08-15	swwww	0.0690716
16007	2001-09-30 23:45:00	2009-07-28 23:30:00	1994-10-23 04:45:00	2015-07-17 05:15:00	2008-08-09 22:00:00	1900-09-13 12:00:00	sswss	93	2002-09-10 00:15:00	2020-08-12 03:45:00	2008-08-09 22:00:00	2001-09-30 23:45:00	2016-01-26 11:15:00	1900-08-11 12:00:00	ssssw	0.304254
17001	2016-04-01 19:15:00	2002-07-30 18:00:00	2004-08-06 03:30:00	2005-09-23 08:45:00	2007-06-20 10:15:00	1900-08-02	wssss	98	2013-04-17 15:15:00	2011-02-03 20:45:00	2011-10-17 15:45:00	2006-12-13 19:45:00	1998-10-21 02:45:00	1900-08-10	wwwww	0.333333
17003	2001-07-04 01:00:00	2018-06-02 17:15:00	2011-07-06 06:15:00	1999-05-12 19:45:00	2021-07-03 18:00:00	1900-07-19	sssss	43	2001-07-04 01:00:00	1999-05-12 19:45:00	2002-08-07 03:00:00	2018-06-02 17:15:00	2005-06-30 18:30:00	1900-07-19	sssss	0.19358
17004	2011-02-07 12:00:00	2010-07-21 05:00:00	2008-08-10 01:00:00	2012-01-04 23:30:00	2012-10-17 13:45:00	1900-07-16	wssww	86	2011-02-07 12:30:00	1999-12-03 10:30:00	2006-03-21 12:30:00	2012-01-04 23:30:00	1999-09-29 06:15:00	1900-07-20	wwwws	0.147151
17005	2019-08-04 17:15:00	1997-08-13 19:00:00	2008-08-01 10:00:00	1993-07-16 17:00:00	2020-08-12 05:00:00	1900-08-01	sssss	66	2020-08-12 05:00:00	1997-08-13 19:00:00	2000-10-29 05:30:00	1999-12-03 07:15:00	2008-08-01 10:00:00	1900-08-10	sswws	0.494829
17008	2020-08-12 01:30:00	2008-04-28 10:30:00	1998-03-29 22:00:00	2015-07-17 06:45:00	1997-02-27 16:45:00	1900-07-29	swwsw	96	2006-12-13 17:00:00	2015-12-05 08:15:00	1998-11-22 03:00:00	2008-01-25 03:15:00	1998-02-11 09:00:00	1900-09-10	wwwww	0.242308
17015	1992-11-01 03:45:00	2007-06-23 17:45:00	1997-09-16 13:00:00	2003-05-24 17:00:00	1998-07-06 22:15:00	1900-07-26	wssss	82	1998-07-06 22:15:00	1993-01-23 20:45:00	2002-09-10 01:30:00	1997-09-16 13:00:00	2000-09-22 10:00:00	1900-09-16	swsss	0.409756
17018	2000-12-12 07:00:00	2014-10-28 11:00:00	2013-10-22 03:15:00	2019-08-09 14:30:00	2002-09-08 12:00:00	1900-10-22	wwwss	125	2000-12-12 07:00:00	2009-11-01 15:30:00	2013-10-22 03:30:00	2014-10-28 11:00:00	2002-09-08 12:00:00	1900-10-22	wwwwss	0.316456
18001	2003-03-02 07:15:00	1997-05-04 11:45:00	2015-07-17 05:45:00	2011-09-25 20:00:00	2015-10-28 16:45:00	1900-08-10	wsssw	88	2003-03-02 07:15:00	2015-07-17 05:45:00	1994-12-28 18:45:00	2004-10-21 08:15:00	2015-10-28 16:45:00	1900-09-08	wswww	0.170521
18002	2002-07-30 20:00:00	2004-08-09 18:00:00	2009-09-10 09:30:00	1992-10-01 08:45:00	2020-08-04 18:30:00	1900-09-10	sssws	90	2004-08-09 18:00:00	2002-07-30 20:45:00	2020-08-04 18:30:00	2012-08-29 18:00:00	2009-11-19 08:45:00	1900-08-30	ssssw	0.0670702
18003	2001-07-04 02:30:00	2004-08-18 18:30:00	1992-08-03 04:00:00	2019-08-09 14:00:00	2016-09-13 04:30:00	1900-08-09	sssss	82	2004-08-18 18:45:00	2001-07-04 02:30:00	2010-09-09 12:15:00	2005-11-11 06:15:00	2008-08-01 11:00:00	1900-08-15	sssws	0.403215
18005	2011-09-25 21:00:00	1998-09-01 15:30:00	1998-12-08 05:00:00	2012-08-29 15:45:00	2008-08-01 12:00:00	1900-07-17	sswss	72	2011-09-25 21:00:00	2012-08-29 15:45:00	2006-06-20 22:15:00	1998-09-01 15:30:00	2016-04-01 19:30:00	1900-08-10	ssssw	0.242197
18008	2016-01-29 06:45:00	2020-01-07 20:15:00	2021-10-26 22:30:00	2008-12-19 16:45:00	1993-01-17 02:45:00	1900-10-05	wwwww	137	1993-01-17 03:00:00	2016-01-29 06:45:00	2000-06-13 06:15:00	2013-05-09 08:45:00	2011-12-08 10:00:00	1900-06-14	wwssw	0.0461721
18010	2018-09-18 23:30:00	2017-09-25 09:00:00	2018-10-10 10:00:00	2019-10-07 21:30:00	2012-12-28 12:00:00	1900-09-16	sswww	100	2018-10-10 10:00:00	2018-09-18 23:30:00	2017-09-25 09:00:00	2008-02-21 22:45:00	2006-09-07 11:00:00	1900-09-07	wssws	0.325408
18011	2012-07-18 10:15:00	2004-10-21 08:30:00	2002-07-30 19:00:00	2018-01-03 16:45:00	1993-01-15 09:30:00	1900-08-05	swsww	84	2004-08-18 19:30:00	2008-08-01 11:45:00	2002-07-30 19:00:00	2001-07-04 03:45:00	2016-03-01 02:15:00	1900-08-04	ssssw	0.0983964
18013	1998-07-31 22:30:00	1996-03-12 00:45:00	2011-02-04 20:30:00	2004-10-25 01:00:00	2020-08-12 07:45:00	1900-08-13	swwws	70	2011-02-04 20:30:00	2004-10-25 01:00:00	2020-08-12 07:45:00	1999-11-28 11:45:00	1993-01-23 21:15:00	1900-09-24	wwsww	0.520093
18014	2009-03-10 12:45:00	2004-01-11 06:15:00	2013-12-14 12:45:00	2002-07-30 19:00:00	1996-08-23 18:30:00	1900-07-02 12:00:00	wwwss	108	1993-01-16 12:30:00	2016-01-26 09:30:00	2008-01-05 21:15:00	1995-01-31 05:00:00	2002-07-30 19:00:00	1900-07-28 12:00:00	wwwws	0.142445
18020	2018-09-16 10:30:00	1997-12-10 14:00:00	2019-09-25 09:30:00	2009-07-03 15:15:00	2000-03-04 10:45:00	1900-08-17 12:00:00	swssw	93	2002-07-30 15:00:00	2019-08-09 12:45:00	2006-12-13 11:15:00	1998-10-20 20:15:00	1993-01-09 04:30:00	1900-08-01	sswww	0.517647
18021	2019-02-01 03:45:00	2018-09-16 10:30:00	2005-01-19 11:15:00	2007-03-11 22:15:00	2002-07-30 13:45:00	1900-07-14	wswws	116	2002-07-30 13:45:00	1993-01-09 04:15:00	2012-11-19 06:45:00	2005-06-19 06:15:00	2009-09-08 07:15:00	1900-09-04 12:00:00	swwss	0.350467
18022	2006-09-28 20:30:00	2008-01-07 16:45:00	2018-11-15 17:45:00	2002-12-04 10:30:00	2006-12-13 20:15:00	1900-10-29	swwww	106	2006-12-13 20:15:00	2002-02-07 11:15:00	2008-10-25 16:15:00	2010-04-07 00:45:00	2002-12-04 10:30:00	1900-10-23	wwwww	0.308866
19001	2002-07-30 16:15:00	2000-08-02 18:15:00	2021-07-04 18:30:00	1997-08-13 23:30:00	2010-06-05 22:00:00	1900-07-30	sssss	91	2002-07-30 17:00:00	2008-08-10 01:45:00	1994-03-14 07:30:00	1997-08-13 23:30:00	2018-06-20 02:45:00	1900-08-11	sswss	0.151373
19004	2016-06-07 12:30:00	2009-07-06 14:30:00	2019-06-24 16:15:00	2010-09-23 03:00:00	2012-08-29 14:45:00	1900-07-16	sssss	76	2016-06-07 12:30:00	2006-05-22 22:45:00	2012-08-29 14:45:00	2000-08-20 17:00:00	2010-09-23 03:00:00	1900-07-06	sssss	0.396203
19005	2021-07-04 15:45:00	2000-07-28 18:45:00	2009-06-14 16:45:00	2013-07-23 19:00:00	2002-07-30 13:00:00	1900-07-29	sssss	76	2002-07-30 14:45:00	2021-07-04 15:45:00	2008-08-10	2000-08-02 16:00:00	2009-06-14 16:45:00	1900-08-10	sssss	0.262635
19006	2004-08-11 22:00:00	2000-08-02 17:00:00	2009-07-16 19:30:00	2014-05-25 12:45:00	2007-07-23 21:45:00	1900-07-23	sssss	74	2004-08-11 22:00:00	2011-07-16 19:00:00	2019-06-24 15:30:00	2000-08-02 17:15:00	2021-07-04 16:45:00	1900-07-16	sssss	0.581388				0.58
19007	2004-08-09 22:00:00	2012-08-29 17:45:00	2011-07-16 20:45:00	2014-06-04 17:15:00	1993-10-06 04:45:00	1900-07-16	ssssw	73	2012-08-29 17:45:00	2004-08-09 22:00:00	2000-04-26 22:15:00	1993-10-07 17:00:00	2001-02-06 18:45:00	1900-07-16	sswww	0.174053
19010	2011-07-08 13:45:00	2018-07-28 10:00:00	2013-07-27 16:45:00	2016-06-10 04:45:00	2000-07-27 15:00:00	1900-07-28	sssss	42	2021-07-04 17:00:00	2011-07-08 13:45:00	2014-05-25 12:30:00	2020-08-11 22:00:00	2012-08-29 14:00:00	1900-07-26	sssss	1.55987
19012	2000-08-02 17:00:00	2011-07-16 18:15:00	2004-08-11 21:00:00	2007-07-01 12:15:00	2005-03-30 13:45:00	1900-07-03 12:00:00	ssssw	84	2011-07-16 18:15:00	2004-08-11 21:00:00	2019-06-24 14:30:00	2000-08-02 17:15:00	2007-07-01 12:15:00	1900-08-07 12:00:00	sssss	0.626722
19014	2013-07-23 19:30:00	2010-06-05 17:45:00	2016-07-20 08:30:00	2006-07-26 06:15:00	2002-07-30 13:45:00	1900-07-27 12:00:00	sssss	43	2002-07-30 13:45:00	2008-08-10 00:15:00	2013-07-23 19:30:00	2020-08-27 17:30:00	2014-05-25 13:15:00	1900-08-06 12:00:00	sssss	0.768868
19017	2021-07-04 16:15:00	2016-06-25 00:45:00	2006-07-02 14:30:00	2000-08-02 16:30:00	1995-07-14 13:30:00	1900-07-29 12:00:00	sssss	52	2021-07-04 16:15:00	2019-06-24 14:00:00	2000-08-02 16:30:00	2016-06-25 00:45:00	2011-07-08 14:15:00	1900-07-11	sssss	0.608557				0.6
19020	1998-09-02 16:45:00	2021-08-09 13:30:00	2019-08-07 18:30:00	2008-08-19 22:00:00	2018-09-19 11:00:00	1900-08-04	sssss	64	1997-08-13 16:30:00	2020-08-04 15:30:00	2003-09-21 23:30:00	1998-09-02 16:45:00	2010-10-30 01:15:00	1900-08-10	ssssw	0.240987
19021	2012-08-05 12:00:00	2013-05-20 18:15:00	2018-06-19 22:30:00	2006-07-02 14:45:00	2008-07-29 21:00:00	1900-07-16	sssss	57	1993-10-07 17:45:00	2000-04-26 20:00:00	2014-12-22 03:30:00	2011-10-17 15:45:00	2014-06-04 16:15:00	1900-08-10	wwwws	0.434564
20001	2020-08-12 02:15:00	2008-04-28 00:15:00	2000-08-28 11:45:00	2021-10-05 17:45:00	2014-06-04 18:15:00	1900-09-03	swsws	106	2020-08-12 02:15:00	1993-10-06 07:00:00	2014-06-04 18:30:00	2021-10-05 19:15:00	2000-10-09 22:00:00	1900-09-23	swsww	0.207849				0.21
20002	2011-10-17 17:45:00	2007-07-22 03:30:00	2011-02-07 08:15:00	2015-12-03 21:15:00	2008-01-10 13:00:00	1900-08-01 12:00:00	wswww	88	2011-10-17 17:30:00	2018-01-24 07:15:00	2007-07-22 03:30:00	2021-10-28 07:45:00	2019-10-19 08:15:00	1900-09-08	wwsww	0.0848896
20003	2020-08-11 22:15:00	2008-04-27 20:30:00	2000-08-28 10:15:00	2005-10-30 14:30:00	1998-04-06 21:45:00	1900-09-03	swsww	84	2020-08-11 22:15:00	2008-04-27 20:30:00	1993-10-06 06:30:00	2012-09-26 10:30:00	2000-08-28 10:15:00	1900-09-03	swwss	0.325192
20007	2011-07-09 06:30:00	2000-11-06 17:00:00	2013-05-20 20:15:00	2000-08-28 08:30:00	2016-07-20 21:15:00	1900-08-29	swsss	90	2000-11-06 17:00:00	2008-08-07 01:00:00	2010-01-16 09:00:00	2020-12-04 19:00:00	2011-07-09 06:30:00	1900-08-31	wswws	0.829295
21003	1959-07-27 14:15:00	2004-08-09 04:00:00	1970-09-08 14:15:00	1972-05-26 03:15:00	1961-01-27 13:15:00	1900-08-18 12:00:00	ssssw	86	1979-01-07 12:30:00	1965-11-01 00:30:00	1962-08-03 19:00:00	1959-07-27 14:15:00	1982-12-19 14:45:00	1900-09-27	wwssw	0.164493
21005	2004-08-09 02:45:00	2018-09-19 14:00:00	1996-10-24 23:30:00	2015-06-01 21:45:00	1998-08-17 04:30:00	1900-08-14	sswss	77	2004-08-09 02:45:00	2000-09-11 11:45:00	1987-10-18 14:45:00	2021-02-20 23:00:00	2018-09-19 14:00:00	1900-08-17	sswss	0.164432				0.16
21006	2004-08-04 04:30:00	1986-07-31 01:00:00	1987-07-10 17:30:00	1988-07-10 09:45:00	1989-09-18 20:15:00	1900-07-22	sssss	78	2004-08-04 04:30:00	2002-03-04 06:45:00	2003-05-30 16:15:00	2007-02-27 09:45:00	2000-09-11 10:00:00	1900-08-04	swsws	0.295276
21007	1967-07-14 15:45:00	1963-03-05 19:45:00	2008-05-10 18:45:00	2020-03-03 17:15:00	1983-10-04 07:45:00	1900-08-06 12:00:00	swsww	84	2003-05-30 16:45:00	1963-03-05 19:45:00	1976-01-02 20:15:00	1967-07-14 15:45:00	1975-05-13 19:45:00	1900-08-14 12:00:00	swwss	0.229009
21008	2005-06-28 04:00:00	2013-04-14 12:15:00	2009-03-08 03:00:00	2007-06-16 22:15:00	2016-12-23 17:00:00	1900-08-20	swwsw	108	2005-06-28 04:00:00	1991-02-24 03:00:00	2020-02-15 23:15:00	2007-06-16 22:15:00	2016-12-23 17:00:00	1900-03-10	swwsw	0.148434
21009	1985-12-21 09:30:00	2001-03-07 12:45:00	2011-10-18 01:30:00	1982-12-19 17:45:00	2016-12-23 22:15:00	1900-09-19	wwwww	106	1985-12-21 09:30:00	1982-01-11 11:30:00	1959-10-27 12:15:00	1962-08-04 06:45:00	1985-07-27 02:30:00	1900-10-11	wwwss	0.234256
21011	2008-05-10 17:30:00	2003-05-30 15:45:00	1997-06-13 16:15:00	2007-06-22 18:00:00	2004-08-09 17:15:00	1900-08-06	sssss	74	2003-05-30 15:45:00	2008-05-10 17:30:00	2005-01-08 06:45:00	2015-12-30 12:00:00	2009-11-19 20:45:00	1900-07-11 12:00:00	sswww	0.462933
21012	2000-07-09 18:30:00	1988-07-10 07:30:00	2013-04-14 08:15:00	2002-08-30 15:15:00	2004-08-09 17:30:00	1900-08-15	sswss	66	2007-06-16 18:15:00	2013-04-14 08:15:00	2000-07-09 18:30:00	2004-08-09 17:45:00	2016-01-27 09:15:00	1900-08-18	swssw	0.181079
21013	2002-01-03 16:45:00	1972-12-12 02:15:00	2012-08-29 15:00:00	1988-07-22 04:15:00	1974-01-05 17:15:00	1900-07-30	wwssw	92	1984-11-03 21:45:00	1972-12-12 02:15:00	2012-08-29 15:00:00	2002-01-03 16:45:00	1986-03-04 19:45:00	1900-09-24	wwsww	0.450903
21014	2004-08-09	2011-05-07 02:30:00	1996-07-03 11:30:00	2002-08-07 08:30:00	1997-10-10 04:15:00	1900-07-26	ssssw	48	2004-08-09	2015-12-30 08:45:00	1987-10-18 06:45:00	2013-12-30 10:45:00	1996-10-24 21:15:00	1900-08-15	swwww	0.223692				0.22
21015	2009-06-14 22:30:00	2002-10-20 19:00:00	1990-09-24 16:45:00	2021-10-05 15:15:00	1992-08-30 11:45:00	1900-08-29	swsws	56	2002-10-20 19:00:00	1990-10-06 20:15:00	1990-09-24 16:45:00	2009-06-14 22:30:00	1992-08-30 11:45:00	1900-09-14	wwsss	0.365881
21016	1986-06-17 14:15:00	2000-08-28 10:30:00	1987-08-17 17:30:00	2019-07-11 17:00:00	1988-04-18 20:45:00	1900-08-03	ssssw	100	1987-08-17 17:30:00	2000-08-28 10:30:00	1984-11-03 13:15:00	1986-06-17 14:15:00	2021-12-04 22:00:00	1900-08-18	sswsw	0.396281
21017	2017-05-27 16:15:00	2008-08-01 06:00:00	2018-06-02 15:15:00	2007-07-18 15:00:00	2002-05-13 18:45:00	1900-08-06	sssss	75	2017-05-27 16:15:00	2008-08-01 06:00:00	2005-10-11 20:00:00	2007-07-18 15:00:00	2009-07-29 00:30:00	1900-09-11	sswss	0.578687				0.58
21018	2021-11-10 12:30:00	2003-05-30 16:30:00	1998-07-31 21:30:00	1999-11-05 10:30:00	2001-08-20 12:30:00	1900-08-09	wssws	89	2021-11-10 12:30:00	2003-05-30 16:30:00	2001-08-20 12:30:00	1998-07-31 21:30:00	1999-11-05 11:00:00	1900-08-10	wsssw	0.516643
21019	2000-07-29 19:15:00	2006-08-18 16:30:00	2007-10-28 06:45:00	1992-08-13	2001-09-30 23:45:00	1900-08-15	sswss	68	2005-10-11 22:15:00	2000-09-11 10:00:00	2015-12-30 09:15:00	2011-12-08 11:00:00	2018-01-24 06:00:00	1900-07-20	wswww	0.226923
21020	2008-05-10 15:30:00	1998-07-31 17:45:00	2007-07-03 19:15:00	2012-08-29 11:30:00	2016-12-23 13:00:00	1900-07-13	ssssw	66	2008-05-10 15:45:00	1997-02-19 16:30:00	2002-03-10 12:00:00	1986-10-04 19:15:00	2015-12-30 07:45:00	1900-08-10	swwww	0.219363
21021	2005-04-18 17:30:00	1989-01-18 08:15:00	1985-07-26 19:45:00	1997-12-18 23:00:00	1982-12-19 14:00:00	1900-08-25 12:00:00	wwsww	108	2005-04-18 17:30:00	1982-12-19 14:00:00	1989-01-18 08:15:00	1985-07-26 19:45:00	1997-12-11 11:00:00	1900-08-25 12:00:00	wwwsw	0.242318
21023	2007-12-22 14:15:00	1990-10-06 20:45:00	1994-12-08 14:30:00	2010-12-10 20:00:00	1993-12-29 18:00:00	1900-07-30	wwwww	124	2010-12-10 20:00:00	2000-11-07 02:45:00	2016-01-27 15:45:00	2007-12-22 14:15:00	1993-01-24 05:00:00	1900-05-02	wwwww	0.116502
21024	2000-07-09 20:15:00	2020-07-27 19:30:00	2015-07-17 11:45:00	2019-07-31 14:00:00	2011-09-06 09:00:00	1900-08-13	sssss	59	2016-06-07 15:45:00	2012-08-05 08:00:00	2011-09-06 09:00:00	2014-08-08 21:00:00	2016-12-23 15:00:00	1900-08-08	ssssw	0.316521
21025	2003-05-30 22:00:00	1993-10-03 01:45:00	2004-08-04 09:30:00	2013-04-14 13:15:00	2015-05-03 17:45:00	1900-08-05	swsws	89	2003-05-30 22:00:00	2012-08-05 08:30:00	2007-06-22 17:45:00	2013-04-14 13:15:00	1993-10-03 01:45:00	1900-07-21	sssww	0.292325				0.29
21026	1992-08-03 02:45:00	2018-08-12 22:15:00	1988-07-10 03:15:00	1997-07-03 17:30:00	2010-12-10 17:15:00	1900-08-14	ssssw	99	2005-10-30 12:45:00	2008-08-06 22:45:00	2015-11-08 15:45:00	1992-08-03 02:45:00	2004-08-09 15:15:00	1900-08-17	wswss	0.278069
21027	2013-05-21 02:30:00	2002-11-02 23:45:00	2002-07-31 02:30:00	1990-10-06 17:45:00	2014-06-13 17:00:00	1900-07-17	swsws	82	2002-11-02 23:45:00	2002-07-31 02:30:00	1987-06-06 06:00:00	2012-06-16 20:00:00	1998-11-03 03:00:00	1900-08-03 12:00:00	wsssw	0.238752
77002	2019-08-06 06:00:00	2009-07-15 23:15:00	2002-07-30 17:30:00	1996-10-12 06:30:00	1995-10-03 06:30:00	1900-08-02	sssww	85	2002-07-30 17:30:00	2005-10-11 22:30:00	1995-10-03 06:30:00	2002-10-27 07:45:00	1991-07-20 18:15:00	1900-08-24	swwws	0.349094
77003	1993-11-09 17:45:00	2002-08-02 14:30:00	1997-11-18 11:00:00	2012-08-04 17:15:00	2019-07-27 16:30:00	1900-08-10	wswss	94	2002-08-02 14:30:00	1988-07-22 05:15:00	2004-08-09 17:45:00	2008-08-01 09:30:00	2000-07-09 20:45:00	1900-08-05	sssss	0.339441				0.34
77004	2002-09-07 07:15:00	2010-08-10 13:45:00	1995-10-03 06:00:00	2009-07-27 07:30:00	1989-09-21 07:15:00	1900-08-14	sswss	73	2007-06-28 19:30:00	2004-08-08 23:30:00	2002-08-02 15:15:00	2000-08-18 02:00:00	2011-07-16 09:00:00	1900-08-19	sssss	0.36786
78003	1989-08-21 01:00:00	2016-12-23 15:00:00	1990-10-03 00:15:00	2005-10-24 11:45:00	2000-10-25 00:15:00	1900-07-31	swwww	73	2013-04-14 12:30:00	1999-07-10 18:15:00	2015-06-01 22:00:00	2007-10-28 11:45:00	2004-08-18 20:00:00	1900-09-06	wssws	0.152987
78004	1989-05-03 10:15:00	2002-05-13 20:45:00	1996-05-22 17:00:00	1998-09-08 04:15:00	2005-04-06 04:00:00	1900-06-19	ssssw	87	1992-01-01 18:15:00	1989-05-03 10:15:00	2015-06-01 20:00:00	2014-03-20 14:45:00	2000-08-14 00:45:00	1900-07-23	wssws	0.687692
78005	2012-08-27 15:15:00	2004-08-08 23:30:00	2015-06-01 21:00:00	1990-06-06 18:15:00	1994-09-06 13:15:00	1900-08-04	sssss	81	1992-08-03 06:00:00	2012-08-27 15:15:00	1990-06-06 18:30:00	2015-06-01 21:00:00	2004-08-08 23:30:00	1900-08-02	sssss	0.130094
78006	2002-07-30 18:15:00	1995-01-31 07:00:00	2015-06-01 19:15:00	1988-02-01 11:30:00	2005-08-24 07:15:00	1900-08-09	swsws	104	1995-01-31 07:00:00	1997-11-18 06:45:00	1991-11-10 20:30:00	1996-10-27 05:15:00	1995-10-24 21:15:00	1900-10-21	wwwww	0.344497
79002	2001-05-14 14:30:00	1999-01-13 11:45:00	2000-02-10 11:00:00	1988-12-18 20:30:00	1963-09-26 04:45:00	1900-09-21 12:00:00	swwws	118	2000-02-10 11:00:00	1967-02-27 14:15:00	1999-01-13 11:45:00	1972-12-11 18:45:00	1962-08-03 17:30:00	1900-10-01	wwwws	0.302899
79003	1993-03-18 14:30:00	1988-12-18 16:45:00	1988-02-01 09:00:00	2005-11-07 20:45:00	2015-06-01 18:45:00	1900-08-10	wwwws	109	1993-03-31 13:30:00	2013-12-30 11:00:00	1988-02-01 09:00:00	1988-12-18 16:45:00	2015-12-30 12:00:00	1900-08-22	wwwww	0.684389
79004	2007-06-12 15:30:00	2008-05-10 18:45:00	2015-07-17 05:15:00	2013-10-03 00:45:00	1988-07-10 03:45:00	1900-08-04	sssws	75	1990-06-06 16:45:00	2001-07-03 23:45:00	2015-07-17 05:15:00	2014-03-20 11:45:00	2007-06-12 15:30:00	1900-08-23	sssws	0.280032
79005	1979-10-19 08:45:00	1982-11-12 09:15:00	1970-08-16 10:00:00	1971-10-17 13:45:00	1987-04-10 19:00:00	1900-08-16	wwsww	80	1982-11-12 09:30:00	2018-08-12 22:30:00	1985-09-21 07:30:00	2020-06-16 21:45:00	1990-08-29 14:45:00	1900-09-20 12:00:00	wssss	0.262561
79006	1968-09-12 09:45:00	2001-07-04 00:45:00	1972-11-09 15:00:00	1982-10-26 13:30:00	2015-06-01 20:00:00	1900-09-15 12:00:00	sswws	93	2001-07-04 01:00:00	1985-09-21 07:45:00	2018-11-29 12:15:00	2003-01-17 05:30:00	1967-10-20 09:15:00	1900-10-04 12:00:00	sswww	0.231019
80001	1999-07-10 21:30:00	1995-03-01 06:15:00	2003-01-17 07:15:00	1992-03-09 12:15:00	1995-10-13 00:15:00	1900-06-22	swwww	95	1999-07-10 21:30:00	2015-12-30 12:00:00	2001-07-04 02:45:00	2019-12-10 18:00:00	2011-01-11 04:00:00	1900-07-10	swsww	0.182992				0.18
80002	1994-04-05 04:45:00	1988-02-24 15:30:00	1989-02-12 06:15:00	1990-08-23 05:30:00	1990-11-03 06:15:00	1900-06-05	wwwsw	117	1994-04-05 04:45:00	2007-12-27 08:30:00	2009-11-05 17:00:00	2008-12-05 08:30:00	2013-11-20 07:45:00	1900-08-04	wwwww	0.250097
80003	2006-07-31 18:45:00	2012-08-04 14:30:00	2007-07-19 13:45:00	2000-09-11 04:30:00	1991-09-21 14:15:00	1900-09-07	sssss	53	2012-08-04 14:30:00	2006-07-31 18:45:00	1992-08-02 23:45:00	1991-09-21 14:15:00	2002-09-07 14:30:00	1900-08-27	sssss	0.516224
80004	2010-01-16 03:30:00	2003-01-12 19:00:00	2020-08-12 18:15:00	2012-08-04 14:45:00	2002-09-07 14:15:00	1900-08-24	wwsss	89	2002-09-07 14:45:00	2010-01-16 03:30:00	2003-01-12 19:00:00	1998-09-01 09:45:00	1988-09-04 23:00:00	1900-09-01	swwss	0.646067
80005	2001-02-10 15:30:00	2012-08-29 04:45:00	2010-10-02 12:45:00	2014-08-06 18:15:00	1994-09-06 07:15:00	1900-08-26 12:00:00	wswss	67	2005-11-07 20:15:00	1994-09-06 07:15:00	2010-10-02 12:45:00	2001-02-10 15:30:00	2012-08-04 15:00:00	1900-08-18	wswws	0.414435
80006	1996-02-16 13:30:00	1998-10-17 09:45:00	2013-12-30 02:00:00	2015-12-30 02:00:00	2012-11-19 05:45:00	1900-08-14	wwwww	130	1996-02-16 13:30:00	2015-12-30 05:45:00	2009-04-27 05:30:00	1998-10-17 09:45:00	1999-12-03 03:45:00	1900-10-03	wwwww	0.115152
81002	1993-06-26 21:15:00	1979-09-01 23:15:00	1983-10-04 01:00:00	2011-08-10 08:15:00	1980-07-27 04:15:00	1900-08-01	sswss	58	1993-06-26 21:15:00	1982-10-01 20:45:00	1980-07-27 04:15:00	1978-08-02 21:30:00	1966-09-02 06:30:00	1900-08-27 12:00:00	swsss	0.343465
81003	1999-11-05 02:30:00	1995-07-11 20:00:00	2011-07-07 06:15:00	2003-11-02 01:15:00	2021-05-03 15:15:00	1900-08-30	wssws	83	1998-10-24 10:15:00	1994-10-23 01:45:00	1988-08-18 02:15:00	2021-05-03 15:15:00	1999-11-05 02:30:00	1900-10-22	wwssw	0.155244
81004	1991-11-01 06:00:00	1988-01-19 05:00:00	1989-08-11 10:15:00	1990-07-19 14:30:00	1990-10-02 18:45:00	1900-10-11	wwssw	104	1991-11-01 06:00:00	1994-12-08 07:15:00	2001-01-05 10:30:00	2016-11-12 14:15:00	2012-11-19 19:00:00	1900-10-25	wwwww	0.127972
81006	1991-08-09 05:30:00	1988-10-18 14:00:00	1991-10-16 06:00:00	2003-09-22 03:45:00	2005-09-19 17:45:00	1900-09-12	swwss	74	1993-05-17 15:15:00	2000-10-25 06:45:00	1991-10-16 06:00:00	1988-10-18 14:00:00	2020-06-17 20:00:00	1900-09-22	swwws	0.285704
81007	2015-07-17 03:00:00	1998-09-01 09:45:00	1992-09-12 22:00:00	2006-09-29 14:00:00	1994-07-10 00:15:00	1900-08-29	sssss	73	1992-09-12 22:00:00	2015-07-17 03:00:00	1998-08-03 10:30:00	2002-10-24 19:15:00	2004-03-19 07:30:00	1900-08-21	sssww	0.175735
82001	1996-04-03 09:30:00	1980-07-26 03:30:00	1988-08-30 09:00:00	1980-11-14 09:00:00	2000-09-11 09:30:00	1900-08-20	wssws	112	1996-04-03 09:30:00	1985-09-21 04:30:00	2000-09-11 09:30:00	1980-11-14 09:00:00	1980-07-26 03:30:00	1900-08-31	wssws	0.528954
82002	1994-08-01 20:45:00	2000-09-11 08:45:00	1999-05-12 16:45:00	1981-09-17 23:45:00	1985-12-31 17:15:00	1900-09-17	ssssw	85	2000-09-11 08:45:00	1994-08-01 20:45:00	1981-09-20 00:45:00	1982-12-19 02:45:00	1985-12-31 17:15:00	1900-09-12	sssww	0.355589
82003	1980-07-26 04:30:00	1999-06-19 20:15:00	1991-08-09 08:15:00	2007-09-16 12:00:00	2015-06-28 11:30:00	1900-08-14	sssss	65	1979-12-19 13:30:00	2001-11-21 16:00:00	1983-10-12 09:30:00	2012-06-23 09:30:00	1982-10-17 13:30:00	1900-08-14	wwwsw	0.367453
83003	2001-07-04 01:45:00	1971-09-01 15:45:00	1993-06-09 18:45:00	2004-08-09 03:45:00	1999-05-12 16:45:00	1900-07-22	sssss	101	2001-07-04 01:45:00	1994-10-23 05:15:00	2010-01-15 22:30:00	1990-05-16 17:30:00	1971-09-01 15:45:00	1900-08-04	swwss	0.519788				0.52
83004	2008-01-26 15:30:00	2011-08-26 17:30:00	2001-07-04 01:30:00	1983-03-05 19:45:00	1988-07-22 02:30:00	1900-08-24	wssws	87	1985-09-21 02:30:00	1982-09-27 17:30:00	1980-07-26 22:30:00	2001-07-04 01:45:00	1982-11-05 22:45:00	1900-10-08	ssssw	0.36564
83005	1999-11-28 09:00:00	2015-07-17 07:30:00	2012-08-06 16:15:00	1986-05-10 05:45:00	2016-05-02 10:45:00	1900-08-19	wssss	77	1986-05-10 05:45:00	1982-11-23 10:45:00	2012-08-06 16:15:00	1999-11-28 09:00:00	1991-11-11 09:00:00	1900-09-16	swsww	0.271837
83006	2001-07-04 05:30:00	2008-08-01 12:30:00	1987-06-06 08:45:00	2012-06-22 13:30:00	2007-07-26 10:15:00	1900-08-24	sssss	70	2001-07-04 05:30:00	2007-07-26 10:15:00	2007-10-04 01:45:00	2000-09-20 06:00:00	2012-06-22 13:30:00	1900-10-03	sswss	0.404675				0.4
83007	2005-09-23 08:30:00	2014-05-19 21:45:00	1992-08-30 14:30:00	2004-05-10 00:30:00	2010-01-15 20:45:00	1900-06-29	ssssw	88	1992-08-30 14:30:00	2005-09-23 08:30:00	2019-07-31 18:45:00	2014-05-19 21:45:00	2011-02-07 07:15:00	1900-06-19	sssss	0.282286
83008	2005-05-19 13:15:00	2012-08-06 18:00:00	2016-11-16 08:15:00	2007-09-16 12:30:00	2004-04-15 11:15:00	1900-08-20 12:00:00	sswsw	96	1985-10-01 08:00:00	2000-07-29 21:15:00	1999-03-28 18:30:00	2005-05-19 13:15:00	2012-08-06 18:15:00	1900-08-17	wswss	0.469512
83009	2020-09-30 11:15:00	1991-08-08 07:00:00	2019-08-30 02:45:00	2016-03-01 01:15:00	2005-09-19 16:30:00	1900-08-15	sssws	77	1987-12-27 13:45:00	1983-10-15 08:00:00	1986-08-13 23:15:00	2020-09-30 11:15:00	2016-03-01 01:15:00	1900-08-14	wwssw	0.278662
83010	2003-05-30 15:30:00	1995-09-13 16:30:00	1997-09-14 04:30:00	2002-08-06 23:45:00	2001-07-04 00:30:00	1900-09-09	sssss	79	1987-12-26 06:45:00	2007-12-02 00:30:00	1990-03-06 03:45:00	2003-09-22 00:15:00	1985-09-21 03:30:00	1900-09-21	wwwss	0.34191
83011	2000-09-11 07:45:00	2001-07-03 23:15:00	2021-12-08 12:45:00	1999-05-12 12:45:00	2017-10-04 09:45:00	1900-10-09	sswsw	67	2010-01-16 08:30:00	2000-10-25 02:15:00	1994-01-14 01:00:00	2000-09-20 05:30:00	1994-12-08 07:15:00	1900-10-09	wwwsw	0.359123
83013	2010-12-28 10:00:00	2012-08-06 14:30:00	2005-05-26 09:30:00	2015-11-12 18:00:00	2009-11-25 13:15:00	1900-10-08	wssww	74	2012-08-06 14:30:00	2005-05-26 09:30:00	2010-12-28 10:00:00	2009-11-25 13:15:00	2007-07-18 17:30:00	1900-09-30	sswws	0.270099
84001	1960-07-12 13:30:00	1985-10-01 05:45:00	1956-08-13 09:15:00	1966-09-04 06:30:00	2000-09-11 13:30:00	1900-09-04 12:00:00	swsss	105	1985-10-01 05:45:00	1960-07-12 13:30:00	1956-08-13 09:15:00	1994-02-01 11:15:00	1983-10-18 10:15:00	1900-08-12 12:00:00	wssww	0.520692
84003	1999-07-21 13:00:00	1972-01-24 11:00:00	1975-12-02 16:15:00	1968-10-03 10:00:00	1973-02-20 17:15:00	1900-08-16	swwww	110	1999-07-21 13:00:00	2008-02-05 15:15:00	2009-05-04 08:15:00	1972-01-24 11:00:00	2006-01-22 22:30:00	1900-09-11	swsww	0.418505
84004	1995-03-25 09:00:00	2017-11-07 15:30:00	2010-01-16 04:00:00	1982-12-19 09:15:00	1979-01-15 23:15:00	1900-10-03	wwwww	107	1995-03-25 09:00:00	2013-12-30 20:00:00	1981-09-20 08:30:00	1982-02-09 00:30:00	1979-11-25 18:00:00	1900-09-20	wwsww	0.0983007
84005	1987-08-20 21:30:00	1985-09-21 04:00:00	2009-05-06 23:45:00	1973-12-11 11:45:00	1995-10-22 11:15:00	1900-09-10	sssww	101	1985-09-21 04:00:00	1973-12-11 11:45:00	1982-12-19 07:45:00	1987-08-20 21:30:00	1991-12-22 08:15:00	1900-09-11 12:00:00	swwsw	0.148235
84006	1976-05-22 03:00:00	1981-09-18 03:00:00	2020-08-04 13:00:00	2021-09-30 08:15:00	2009-09-08 07:15:00	1900-06-01 12:00:00	sssss	67	1981-09-18 03:00:00	1976-05-22 03:15:00	1982-09-27 15:30:00	1999-04-20 09:00:00	2020-08-04 14:15:00	1900-06-26 12:00:00	sssws	0.252382
84008	2011-08-26 16:00:00	2004-08-08 22:00:00	2020-06-10 16:15:00	1994-07-31 19:15:00	2016-07-20 09:45:00	1900-07-31	sssss	89	2008-09-02 21:15:00	2004-12-14 12:30:00	2012-08-04 19:45:00	2006-05-04 22:00:00	1994-02-01 07:15:00	1900-09-20	swssw	0.306697
84009	2001-07-04 00:15:00	1978-06-22 20:15:00	2007-07-18 18:00:00	2018-06-01 16:00:00	1999-07-10 19:15:00	1900-08-05	sssss	87	2001-07-04 00:15:00	2007-07-18 18:00:00	1982-09-27 14:15:00	1982-12-19 04:15:00	2000-09-11 09:45:00	1900-08-20	sssws	0.981319
84011	2008-07-31 04:00:00	1994-07-31 21:00:00	2014-05-20	1988-10-19 04:15:00	1981-09-17 03:45:00	1900-08-05	sssws	90	1981-01-01	1999-11-26 12:15:00	1983-02-04 18:30:00	1980-09-07 09:45:00	1986-08-14 02:45:00	1900-08-09	wwwss	0.722807
[truncated: 57 more rows]

## Sheet: summary
Stat no	15m H max	Hmax/Hmed	15m Q max	Qmax/Qmed	15 qmax/Qmed	Prop Q rise	15m Qmax/area		Rise to Peak time	Max Q date		n	n+1	n+2	n+3	Area	Qmed FF	Qmed NRFA
[truncated: 98 more rows]
