# Supplementary material for: Characteristics of gauged abrupt wave fronts (walls of water) in flash floods in Scotland
Source: Copernicus journal article supplement (doi:10.5194/hess-29-5777-2025), 2025-10-28
Supplement: Supplementary file 3 [file Supplementary data.xlsx]

## Sheet: Sheet1
Stat no	15m H max	Hmax/Hmed	15m Q max	Qmax/Qmed	15 qmax/Qmed	Prop Q rise	15m Qmax/area		Rise time to pk	latitude	longitude	river	location	station-level	Area
3003	0.9	2.64706	61.79	2.26	0.176543	21.99	0.187		45	57.9618	-4.70086	Oykel	Easter Turnaig	15.6	330.7
3004	1.42	2.12	43.73	1.69	0.234679	63.34	0.233227		60	57.9821	-4.58615	Cassley	Rosehall	3.3	187.5
4003	0.79	3.76	24.03	3.33	0.298139	20.54	0.119552		105	57.696	-4.25876	Alness	Alness	11.9	201
4007	0.5	2.9	13.1	2.5	0.1	8.34	0.0453287		30	57.6167	-4.68803	Blackwater	Garve	71	289
4011	0.68	2.52	27.41	2.89	0.49575	19.17	0.469349		30	57.5135	-5.00188	Meig	Corrievuic	158	58.4
6011	1.38	2.53	69.83	4.16	0.773482	28.51	0.920026		45	57.1295	-4.6782	Tarff	Ardachy Bridge	33.1	75.9
6012	0.64	3.2	8.36	3.2	0.2375	50.08	0.148754		120	57.3335	-4.67308	Enrick	White Bridge	144.1	56.2
7001	1.16	1.71	123.4	2.47	0.450365	43.91	0.29692		15	57.3772	-3.95482	Findhorn	Shenachie	252.4	415.6
7002	1.87	2.34	209.02	2.47	0.593807	28.0564	0.267323		195	57.6048	-3.64408	Findhorn	Forres	9.6	781.9
7004	0.65	3.42	24	2.82	0.246914	15.26	0.0766773		60	57.5717	-3.87026	Nairn	Firhall	7.2	313
8004	1.41	2.37	144.02	3.38	0.682559	12.86	0.265328		30	57.3999	-3.35705	Avon	Delnashaugh	156	542.8
8006	0.7	3.68	151.87	3.86	0.301329	2.2	0.0530791		105	57.551	-3.14039	Spey	Boat o Brig	43.1	2861.2
8008	0.96	2.04	33.94	3.74	0.669428	5.61	0.260476		60	57.0717	-3.99864	Tromie	Tromie Bridge	240	130.3
8009	0.68	2.62	15.42	2.44	0.174237	10.08	0.0566495		90	57.302	-3.69912	Dulnain	Balnaan Bridge	223.7	272.2
8011	0.73	4.87	22.33	8.05	0.660651	4.29	0.214712		15	57.3445	-3.32822	Livet	Minmore	215.1	104
8013	0.76	2.14	40	3.84	0.34188	6.28	0.17316		75	57.1189	-3.90108	Feshie	Feshie Bridge	231.9	231
9001	0.69	2.88	34.28	2.61	0.267813	10.11	0.0776268		60	57.5057	-2.78238	Deveron	Avochie	81.8	441.6
9002	0.6	2.5	31.9	3.79	0.120833	5.24	0.0334066		45	57.5377	-2.49353	Deveron	Muiresk	25.3	954.9
9010	0.83	2.02	22.94	1.85	0.257753	18.56	0.101729		105	57.455	-2.80756	Deveron	Huntly	117.5	225.5
11003	0.64	2.4	25.59	4.77	0.274571	5.29	0.0512826		270	57.2423	-2.71712	Don	Bridge of Alford	133.2	499
12001	0.87	2.49	107.75	3.67	0.246568	6.34	0.0786496		45	57.0501	-2.60357	Dee	Woodend	70.5	1370
12003	0.69	2.13	64	2.89	0.211221	6.98	0.0927536		90	57.0551	-3.08318	Dee	Polhollick	216.7	690
12005	0.46	2	22.97	2.94	0.326743	7.32	0.208818		60	57.0395	-3.04931	Muick	Invermuick	200.7	110
12007	0.62	2.82	46.84	2.11	0.255956	8.05	0.162076		60	56.988	-3.4862	Dee	Mar Lodge	331.9	289
12008	0.72	1.94	29.36	1.78	0.219104	3.55	0.12821		75	57.0252	-2.51716	Feugh	Heugh Head	69	229
12009	0.81	2.19	15.1	2.11	0.409436	10.85	0.36211		75	56.9408	-2.6194	Water of Dye	Charr	239	41.7
13004	0.67	2.27	28.15	2.43	0.425677	18.89	0.270673		15	56.7147	-2.98876	Prosen Water	Prosen Bridge	109.3	104
13007	0.61	2	36.03	2.15	0.107291	5.85	0.048558		120	56.7669	-2.49337	North Esk	Logie Mill	10.6	742
13008	0.56	2.95	28	2.79	0.210875	2.32	0.057377		90	56.7269	-2.6559	South Esk	Brechin	18	488
13009	1.02	1.91	48.74	2.19	0.491009	35.07	0.383176		45	56.8022	-2.67048	West Water	Dalhouse Bridge	49.2	127.2
15010	1.04	2.21	21.79	2.23	0.176752	6.25	0.0594543		105	56.6059	-3.15123	Isla	Wester Cardean	41.5	366.5
15011	0.55	2.39	35.49	2.74	0.162055	2.91	0.0907441		30	56.6142	-3.98086	Lyon	Comrie Bridge	92.1	391.1
15013	1.55	2.24	62.21	2.52	0.514132	24.49	0.355892		30	56.4153	-3.5136	Almond	Almondbank	20.4	174.8
15014	0.91	2.53	28.51	2.71	0.491001	4.51	0.276796		135	56.7493	-3.54493	Ardle	Kindrogan	248	103
15023	0.33	3.62	10.15	5.7	0.0805556	3.64	0.0483333			56.561	-3.6072	Braan	Hermitage	52.6	210
15025	0.57	1.78	45.23	2.28	0.235567	5.94	0.104699		210	56.6091	-3.34718	Ericht	Craighall	76.2	432
15034	0.99	1.92	95.74	2	0.243344	24.49	0.12851		30	56.7503	-3.7991	Garry	Killiecrankie	135	745
15039	1.24	2.48	69.5	3.38	0.463751	33.25	0.421212		15	56.8224	-3.81654	Tilt	Marble Lodge	237.6	165
16003	1.88	2.29	104.55	2.74	0.670192	42.64	1.05075		45	56.3597	-4.00144	Ruchill Water	Cultybraggan	62.3	99.5
18003	0.56	2.83	62.28	3.83	0.274361	2.54	0.120301		45	56.1857	-4.05557	Teith	Bridge of Teith	14.8	517.7
18005	0.48	2.4	20.33	2.53	0.264714	2.88	0.0968095		135	56.159	-3.95637	Allan Water	Bridge of Allan	11.2	210
19005	0.6	4	20.81	3.75	0.22473	11.76	0.0908734		15	55.9018	-3.46302	Almond	Almondell	73.6	229
19006	0.83	4.37	17.68	5.31	0.570323	7.22	0.165234		45	55.9456	-3.23779	Water of Leith	Murrayfield	37.5	107
19012	0.46	4.18	14.33	5.2	0.626859	4.3	0.199028		45	55.9058	-3.26214	Water of Leith	Colinton	92.2	72
19017	0.65	2.55	6.35	3.07	0.508	33.42	0.16366		30	55.9453	-3.34512	Gogar Burn	Turnhouse	32.1	38.8
20001	0.75	5.36	13.77	3.35	0.237824	10.75	0.0448534		120	55.9825	-2.6572	Tyne	East Linton	16.5	307
21005	0.61	4.07	24.16	3.11	0.172571	5.02	0.259785		75	55.6448	-3.26315	Tweed	Lyne Ford	167	93
21007	0.48	2.27	38.64	2.4	0.170973	9.47	0.60375		135	55.5747	-2.81754	Ettrick Water	Lindean	99.1	64
21011	0.71	5.92	40.59	4.34	0.455556	13.62	0.175714		75	55.5397	-2.89034	Yarrow Water	Philiphaugh	128	231
21012	0.75	2.42	37.86	1.84	0.194154	4.4	0.117214		105	55.4344	-2.75646	Teviot	Hawick	90.1	323
21014	0.66	2.54	25.02	2.96	0.223692	4.65	0.18		75	55.5424	-3.41395	Tweed	Kingledores	214	139
21015	0.52	4	14.41	4.19	0.239369	8.48	0.0602929		195	55.6408	-2.69291	Leader Water	Earlston	103	239
21016	0.77	5.92	10.54	5.23	0.2635	23.95	0.0885714		30	55.8652	-2.09448	Eye Water	Eyemouth Mill	2.9	119
21017	1.3	2.48	42.14	3.86	0.697682	117.05	1.12373		30	55.4063	-3.21106	Ettrick Water	Brockhoperig	259	37.5
21024	1.11	2.92	21.4	2.75	0.310595		0.153957		45	55.4849	-2.54606	Jed Water	Jedburgh	65.6	139
21025	0.87	3.78	15.73	4.23	0.304255	15.89	0.0904023		90	55.5123	-2.58084	Ale Water	Ancrum	61.2	174
77002	1.36	3.32	130.02	3.62	0.357198	6.53	0.262667		45	55.0663	-2.94623	Esk	Canonbie	22.4	495
77003	1.35	2.05	103	2.14	0.346801	11.04	0.322884		60	55.0744	-2.9184	Liddel Water	Rowanburnfoot	27.1	319
77004	0.82	1.61	14.29	2.13	0.36786	4.82	0.198472		180	55.0128	-3.11959	Kirtle Water	Mossknowe	20.8	72
78005	0.59	1.97	16.12	1.59	0.13	11.19	0.070393		60	55.1463	-3.42823	Kinnel Water	Bridgemuir	44.9	229
79004	0.95	2.11	34.01	1.79	0.237832	64.17	0.239507		30	55.2274	-3.81704	Scar Water	Capenoch	48.5	142
79006	0.93	1.79	81.27	2.1	0.225125	8.02	0.172548		60	55.2746	-3.79952	Nith	Drumlanrig	52.2	471
80001	0.83	4.15	17.15	3.36	0.196224	18.24	0.0861809		180	54.9299	-3.84097	Urr	Dalbeattie	10.3	199
81002	0.92	2.48	39.69	3.83	0.185467	10.56	0.107853		30	54.9573	-4.48053	Cree	Newton Stewart	4.8	368
82001	0.77	7.22	32.91	6.2	0.379147	3.44	0.134053		120	55.2588	-4.80772	Girvan	Robstone	9.1	245.5
82002	1.23	5	19.29	3.98	0.318002	4.76	0.059537		30	55.41	-4.62705	Doon	Auchendrane	22.2	324
82003	1.22	3.15	53.13	3.41	0.264328	15.72	0.155806		30	55.1072	-4.96832	Stinchar	Balnowlart	8.6	341
83003	1.22	3.87	53.98	3.98	0.519038	40.89	0.324594		120	55.5046	-4.33659	Ayr	Catrine	89.9	166.3
83004	0.72	2.48	17.7	4.21	0.133083	5.65	0.0977901		60	55.4668	-4.36207	Lugar Water	Langholm	80.7	181
83005	0.85	4	45.87	3.91	0.22935	3.07	0.120489		90	55.5971	-4.62779	Irvine	Shewalton	4.8	380.7
83006	1.77	3.4	114.6	3.77	0.449412	20.5	0.199652		60	55.461	-4.59255	Ayr	Mainholm	2.5	574
83008	0.98	2.39	17.78	3.08	0.196247	22.22	0.195385		15	55.6114	-4.61938	Annick Water	Dreghorn	14	91
83009	0.56	2.07	27.56	2.69	0.221579	16.21	0.149946		165	55.6456	-4.69206	Garnock	Kilwinning	4.4	183.8
83013	0.38	2.62	25.97	2.81	0.295449	2.98	0.119128		45	55.6012	-4.49356	Irvine	Glenfield	20.6	218
84008	0.53	1.96	12.32	2.28	0.306697	3.38	0.240156		30	55.8191	-4.10898	Rotten Calder Water	Redlees	16.8	51.3
84009	1.05	4.67	34.67	6.37	0.981319	12.51	0.525303		60	55.6651	-3.89367	Nethan	Kirkmuirhill	121.8	66
84014	0.68	2.34	25.77	2.56	0.158098	13	0.0970621		30	55.7442	-3.98682	Avon Water	Fairholm	53.9	265.5
84016	0.64	4.57	8.59	4.38	0.499419	1.65	0.253392		60	55.9295	-4.0196	Luggie Water	Condorrat	68	33.9
84035	0.62	1.82	7.31	2.19	0.363682	27.07	0.435119		30	55.7787	-4.24066	Kittoch Water	Waterside	100.4	16.8
85001	??	??	49.5	11.43	0.399194	5.34	0.0631136		15	55.9888	-4.57598	Leven	Linnbrane	5.3	784.3
85002	1.26	4.67	45.76	4.84	0.387797	5.21	0.208095		135	56.0481	-4.43451	Endrick Water	Gaidrew	9.5	219.9
85003	0.72	2.24	55.1	2.32	0.344375	7.45	0.686177		45	56.3377	-4.71764	Falloch	Glen Falloch	9.5	80.3
85004	0.38	2.09	30.82	3.56	0.564572	6.54	0.873088		30	56.1003	-4.64412	Luss Water	Luss	16.2	35.3
89002	0.59	2.95	24.27	2.41	0.265449	27.58	0.480594		45	56.5398	-4.81356	Linne nam Beathach	Victoria Bridge	168.3	50.5
89007	0.61	2.77	23.04	3.2	0.657534	19.33	0.956017		45	56.2164	-5.29625	Abhainn a' Bhealaich	Braevallich	46.1	24.1
90003	0.88	1.63	33.29	1.64	0.272869	5.72	0.481069		30	56.8215	-5.08884	Nevis	Claggan	3.6	69.2
91002	1.13	4.52	128	3.78	0.194083	6.6	0.102236		45	56.8785	-5.04652	Lochy	Camisky	12.3	1252
92002	0.8	2.29	10.04	2.77	0.743704	62.75	1.23951		30	56.7585	-5.61366	Allt Coire nan Con	Polloch	18.8	8.1
92003	0.98	1.8	59.09	1.48	1.4791	15.71	2.34484		45	56.7072	-5.55678	Strontian	Ariundle	12	25.2
93002	0.69	1.73	34.68	1.69	0.195855	5.87	0.261145		60	57.3188	-5.42484	Ling	Killilan	2	132.8
95002	0.52	2.23	18.17	3.12	0.123011	21.63	0.128501		30	57.8105	-5.05824	Broom	Inverbroom	4.6	141.4
95003	0.56	2.15	14.06	2.37	0.416716	15.28	0.455016		45	57.9748	-5.10059	Langwell	Langwell Lodge	28.3	30.9
96004	1.08	2.3	73.06	2.1	0.367136		0.69581		45	58.3472	-4.64462	Strathmore	Allnabad	21.9	105
