# Supplementary material for: Characteristics of gauged abrupt wave fronts (walls of water) in flash floods in Scotland
Source: Copernicus journal article supplement (doi:10.5194/hess-29-5777-2025), 2025-10-28
Supplement: Supplementary file [file hess-29-5777-2025-supplement-title-page.pdf › hess-29-5777-2025-supplement-title-page.pdf]

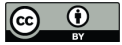

*Supplement of*

## **Characteristics of gauged abrupt wave fronts (walls of water) in flash floods in Scotland**

**David R. Archer et al.**

*Correspondence to:* David R. Archer (d.r.archer@ncl.ac.uk)

- [hess-29-5777-2025-supplement-title-page.pdf](#)
- [Supplementary data B.xlsx](#)
- [Supplementary data.xlsx](#)

The copyright of individual parts of the supplement might differ from the article licence.
